# Supplementary material for: Novel and Known Gene-Smoking Interactions With cIMT Identified as Potential Drivers for Atherosclerosis Risk in West-African Populations of the AWI-Gen Study
Source: Front Genet. 2020 Feb 7;10:1354. doi: 10.3389/fgene.2019.01354 (PMC7025492; doi:10.3389/fgene.2019.01354)
Supplement: Supplementary file 1 [file DataSheet_1.xlsx]

## Sheet: SuppTable_1
Supplementary Table 1. Summary of suggestive and significant SNPs with betas in non-smokers and smokers group.
SNP	CHR	POS	A1	A2	All.BETA_NonSmokers	All.SE_NonSmokers	All.Freq__NonSmokers	All.BETA_Smokers	All.SE_Smokers	All.Freq_Smokers	Beta Interaction	All.P_GXE	Nanoro.BETA_NonSmokers	Nanoro.SE_NonSmokers	Nanoro.Freq_NonSmokers	Nanoro.BETA_Smokers	Nanoro.SE_Smokers	Nanoro.Freq_Smokers	Beta Interaction	Nanoro.P_GXE	Navrongo.BETA_NonSmokers	Navrongo.SE_NonSmokers	Navrongo.Freq_NonSmokers	Navrongo.BETA_Smokers	Navrongo.SE_Smokers	Navrongo.Freq_Smokers	Beta Interaction	Navrongo.P_GXE	Num	MAPPED_TRAIT	Publi	GeneName
rs6685095	1	6502548	T	C	-0.005461	0.00631	0.1312	0.04694	0.00973	0.135	-4.51852	6.225e-06	-0.007357	0.007716	0.1515	0.04163	0.01822	0.1429	-2.47578	0.01329	-0.001246	0.01098	0.1231	0.04856	0.01144	0.12	-3.14101	0.001677	31	-	-	-
rs11121879	1	6505671	A	G	-0.00662	0.006247	0.1301	0.04472	0.009775	0.1384	-4.4256	9.623e-06	-0.008365	0.007601	0.1515	0.04163	0.01822	0.1487	-2.53243	0.01133	-0.0028	0.01101	0.1216	0.04544	0.01152	0.1189	-3.02726	0.002457	5	macrophage inflammatory protein 1b measurement	Ahola-Olli AV, Am J Hum Genet, 2016	GABRD
rs1192824	2	101821934	T	C	0.01153	0.004696	0.6742	-0.03864	0.007228	0.6983	5.8205	5.902e-09	0.01619	0.005869	0.697	-0.03576	0.01373	0.7067	3.47916	0.0005006	0.003377	0.0078	0.6652	-0.03832	0.008456	0.6822	3.62454	0.0002895	6	-	-	-
rs79414964	5	107950880	T	C	-0.02111	0.00896	0.04516	0.06598	0.01648	0.0595	-4.64276	3.44e-06	-0.008625	0.01104	0.04924	0.1274	0.02853	0.06272	-4.44649	8.741e-06	-0.04468	0.01524	0.04354	0.03879	0.01976	0.05333	-3.34492	0.000823	36	-	-	-
rs77655815	5	107952834	A	T	-0.01555	0.008462	0.05591	0.06814	0.01491	0.06789	-4.88162	1.056e-06	-0.0003257	0.01063	0.05682	0.1182	0.02684	0.06911	-4.10573	4.012e-05	-0.04232	0.01383	0.05556	0.04696	0.01764	0.06556	-3.98302	6.826e-05	33	-	-	-
rs205478	1	10811672	C	T	-0.009733	0.006338	0.8688	0.03406	0.01004	0.8642	-3.6884	0.000225	-0.01254	0.007801	0.8144	0.06752	0.01625	0.8583	-4.44149	8.905e-06	-0.004604	0.01086	0.8904	0.01664	0.01265	0.8756	-1.27422	0.2026	22	systolic blood pressure; diastolic blood pressure; hypertension; mean arterial pressure; pulse pressure measurement; small vessel stroke; stroke; Ischemic stroke; atrial fibrillation; systolic blood pressure, alcohol consumption measurement; diastolic blood pressure, alcohol drinking; diastolic blood pressure, alcohol consumption measurement; pulse pressure measurement, alcohol drinking; mean art…	Lu X, Hum Mol Genet, 2014; Levy D, Nat Genet, 2009; Kato N, Nat Genet, 2011; Liu C, Nat Genet, 2016; Wain LV, Hypertension, 2017; Malik R, Nat Genet, 2018; Kanai M, Nat Genet, 2018; Surendran P, Nat Genet, 2016; Roselli C, Nat Genet, 2018; Feitosa MF, PLoS One, 2018; Sung YJ, Am J Hum Genet, 2018	RP5-857K21.3; RP5-857K21.5; MTND2P28; RP11-206L10.9; SAMD11; AL645608.1; WI2-2994D6.1; AL121992.1; RP11-169K16.8; C1orf64; IGSF21; AKR7A3; NBL1; TMCO4; RP11-91K11.2; PLA2G2D; PLA2G2F; UBXN10; RP3-340N1.6; MUL1; PFN1P10; RP11-63N8.3; RAP1GAP; LDLRAD2; CELA3A; CDC42-IT1; ZBTB40; EPHA8; C1QB; MIR4253; C1orf234; LUZP1
rs205482	1	10813675	G	T	-0.01262	0.006032	0.8516	0.03239	0.009377	0.8494	-4.03692	5.419e-05	-0.01642	0.007443	0.7992	0.06281	0.01571	0.842	-4.55765	5.163e-06	-0.00626	0.01028	0.8724	0.01861	0.01158	0.8633	-1.60611	0.1083	23	systolic blood pressure; diastolic blood pressure; hypertension; mean arterial pressure; pulse pressure measurement; small vessel stroke; stroke; Ischemic stroke; atrial fibrillation; systolic blood pressure, alcohol consumption measurement; diastolic blood pressure, alcohol drinking; diastolic blood pressure, alcohol consumption measurement; pulse pressure measurement, alcohol drinking; mean art…	Lu X, Hum Mol Genet, 2014; Levy D, Nat Genet, 2009; Kato N, Nat Genet, 2011; Liu C, Nat Genet, 2016; Wain LV, Hypertension, 2017; Malik R, Nat Genet, 2018; Kanai M, Nat Genet, 2018; Surendran P, Nat Genet, 2016; Roselli C, Nat Genet, 2018; Feitosa MF, PLoS One, 2018; Sung YJ, Am J Hum Genet, 2018	RP5-857K21.3; RP5-857K21.5; MTND2P28; RP11-206L10.9; SAMD11; AL645608.1; WI2-2994D6.1; AL121992.1; RP11-169K16.8; C1orf64; IGSF21; AKR7A3; NBL1; TMCO4; RP11-91K11.2; PLA2G2D; PLA2G2F; UBXN10; RP3-340N1.6; MUL1; PFN1P10; RP11-63N8.3; RAP1GAP; LDLRAD2; CELA3A; CDC42-IT1; ZBTB40; EPHA8; C1QB; MIR4253; C1orf234; LUZP1
rs11588151	1	55487648	G	A	-0.02379	0.007778	0.0871	0.04018	0.01183	0.08314	-4.51832	6.216e-06	-0.0225	0.009659	0.05303	0.03026	0.02954	0.08246	-1.69761	0.08955	-0.02563	0.01307	0.1006	0.04251	0.01283	0.08444	-3.72048	0.0001986	9	myocardial infarction; coronary heart disease; coronary artery disease; percutaneous transluminal coronary angioplasty, coronary artery bypass, angina pectoris, ischemic cardiomyopathy, myocardial infarction, coronary artery disease	Kathiresan S, Nat Genet, 2009; Schunkert H, Nat Genet, 2011; Nikpay M, Nat Genet, 2015; van der Harst P, Circ Res, 2017; Nelson CP, Nat Genet, 2017	MTATP6P1; RP11-206L10.10; MIB2; GNB1; PLOD1; AGMAT; NBPF1; RNU1-4
rs616472	1	84737302	T	C	0.003561	0.004508	0.3376	-0.01101	0.007237	0.3562	1.70897	0.08746	0.008433	0.005572	0.3636	-0.05912	0.01357	0.3624	4.60502	4.093e-06	-0.004948	0.007635	0.3273	0.004713	0.008309	0.3444	-0.856154	0.3919	30	-	-	-
rs11161454	1	85262902	A	G	-0.0005356	0.007617	0.9194	0.04205	0.01181	0.9123	-3.0303	0.002444	-0.009696	0.009426	0.9015	0.08421	0.01807	0.9111	-4.60759	4.077e-06	0.01569	0.01286	0.9264	0.0109	0.0151	0.9144	0.241504	0.8089	6	smoking cessation	Argos M, J Med Genet, 2014	KLHL17
rs12564032	1	85264974	G	A	-0.005055	0.00751	0.9151	0.03675	0.01134	0.91	-3.0736	0.002124	-0.01402	0.009374	0.9053	0.07814	0.0185	0.9117	-4.44372	8.866e-06	0.01055	0.01247	0.9189	0.009923	0.014	0.9067	0.0334429	0.9732	13	smoking cessation	Argos M, J Med Genet, 2014	KLHL17
rs10873658	1	85271091	T	C	-0.005443	0.007488	0.9151	0.03675	0.01134	0.9092	-3.1049	0.001911	-0.0156	0.009349	0.9053	0.07814	0.0185	0.9111	-4.52237	6.141e-06	0.01069	0.01242	0.9189	0.009923	0.014	0.9056	0.0409829	0.9674	4	smoking cessation	Argos M, J Med Genet, 2014	KLHL17
rs4256829	1	85274012	A	T	-0.005443	0.007488	0.9151	0.03675	0.01134	0.9092	-3.1049	0.001911	-0.0156	0.009349	0.9053	0.07814	0.0185	0.9111	-4.52237	6.141e-06	0.01069	0.01242	0.9189	0.009923	0.014	0.9056	0.0409829	0.9674	26	smoking cessation	Argos M, J Med Genet, 2014	KLHL17
rs2892844	1	85275714	G	A	-0.00535	0.007534	0.9151	0.03675	0.01134	0.9096	-3.09227	0.001995	-0.01564	0.009439	0.9053	0.07814	0.0185	0.9117	-4.51542	6.337e-06	0.01069	0.01242	0.9189	0.009923	0.014	0.9056	0.0409829	0.9674	25	smoking cessation	Argos M, J Med Genet, 2014	KLHL17
rs9729018	1	85279077	T	C	-0.006224	0.006418	0.8667	0.02279	0.009136	0.8699	-2.59866	0.009348	-0.01192	0.008027	0.8561	0.07101	0.01559	0.8769	-4.72936	2.241e-06	0.003607	0.01065	0.8709	-0.00246	0.01091	0.8567	0.397932	0.6907	41	smoking cessation	Argos M, J Med Genet, 2014	KLHL17
rs12743305	1	102039804	T	G	-0.003352	0.00584	0.1591	0.01925	0.009382	0.1499	-2.04522	0.04081	0.00835	0.007012	0.1742	-0.02	0.0165	0.1626	1.58131	0.1139	-0.03238	0.01051	0.1532	0.03956	0.01117	0.1256	-4.69056	2.72e-06	14	-	-	-
rs7549104	1	102039854	A	G	-0.0001539	0.006032	0.1527	0.02329	0.009617	0.1373	-2.06515	0.03894	0.01042	0.007201	0.1629	-0.0163	0.01719	0.1516	1.43368	0.1516	-0.02861	0.01106	0.1486	0.04324	0.01136	0.11	-4.53176	5.868e-06	36	-	-	-
rs7538987	1	102039858	T	A	-2.957e-05	0.006036	0.1527	0.02329	0.009617	0.1369	-2.05381	0.04003	0.01061	0.007206	0.1629	-0.0163	0.01719	0.151	1.44373	0.1488	-0.02861	0.01106	0.1486	0.04324	0.01136	0.11	-4.53176	5.868e-06	35	-	-	-
rs9662096	1	85283089	T	A	-0.0058	0.005475	0.8172	0.0222	0.008079	0.8089	-2.86903	0.004123	-0.005954	0.006704	0.8068	0.06496	0.01451	0.8107	-4.4366	9.12e-06	-0.005342	0.009472	0.8213	0.002821	0.009473	0.8056	-0.609355	0.5423	39	smoking cessation	Argos M, J Med Genet, 2014	KLHL17
rs74115213	1	115054290	G	T	-0.01205	0.007321	0.08065	0.05065	0.01208	0.09535	-4.43885	9.022e-06	-0.008417	0.008854	0.07955	0.05063	0.02324	0.1005	-2.37428	0.01758	-0.01795	0.01304	0.08108	0.05231	0.01399	0.08556	-3.67375	0.0002388	32	-	-	-
rs2427805	1	158672353	C	T	-0.02366	0.008121	0.9323	0.03503	0.01323	0.9237	-3.78068	0.0001557	-0.01087	0.009941	0.9394	0.02643	0.02788	0.9199	-1.26017	0.2076	-0.05428	0.01396	0.9294	0.03612	0.01488	0.9311	-4.43065	9.417e-06	24	-	-	-
rs857924	1	158696300	A	G	-0.0236	0.008771	0.943	0.04142	0.01411	0.9363	-3.91358	9.086e-05	-0.01111	0.01077	0.9508	0.02617	0.03056	0.9332	-1.15054	0.2498	-0.05308	0.01501	0.9399	0.04342	0.01575	0.9422	-4.43537	9.186e-06	38	-	-	-
rs452108	1	158716549	A	C	-0.0232	0.008649	0.943	0.04345	0.01383	0.934	-4.086	4.385e-05	-0.01003	0.01062	0.9583	0.02828	0.03294	0.9309	-1.10692	0.2684	-0.05378	0.01477	0.9369	0.04464	0.01509	0.94	-4.66105	3.169e-06	28	-	-	-
rs9727725	1	85286679	T	C	-0.004751	0.006583	0.8763	0.02578	0.009441	0.8764	-2.65268	0.007986	-0.01393	0.008247	0.8598	0.07252	0.01563	0.8815	-4.89184	1.006e-06	0.01107	0.01086	0.8829	-0.0008681	0.01145	0.8667	0.756482	0.4494	40	smoking cessation	Argos M, J Med Genet, 2014	KLHL17
rs11161464	1	85298111	G	A	-0.005152	0.006559	0.8753	0.02855	0.009403	0.8749	-2.93966	0.003288	-0.01482	0.008163	0.8598	0.07252	0.01563	0.8775	-4.95314	7.335e-07	0.01161	0.01094	0.8814	0.003356	0.01141	0.87	0.522163	0.6014	7	smoking cessation	Argos M, J Med Genet, 2014	KLHL17
rs1057305	1	175126223	A	T	-0.0004163	0.004921	0.2656	0.01139	0.007753	0.2574	-1.28569	0.1986	-0.005727	0.006103	0.25	0.063	0.01361	0.2607	-4.60769	4.077e-06	0.01119	0.008272	0.2718	-0.006834	0.009079	0.2511	1.46748	0.1423	3	diastolic blood pressure	Warren HR, Nat Genet, 2017	RP13-436F16.1
rs112334626	1	210976504	A	G	-0.00678	0.007027	0.1237	0.01551	0.01041	0.1026	-1.77472	0.07602	-0.01057	0.008398	0.1136	0.08116	0.01882	0.1098	-4.45103	8.554e-06	0.001493	0.01288	0.1276	-0.007927	0.0121	0.08889	0.533043	0.594	8	-	-	-
rs79936010	1	210977179	G	C	-0.00678	0.007027	0.1237	0.01551	0.01041	0.1026	-1.77472	0.07602	-0.01057	0.008398	0.1136	0.08116	0.01882	0.1098	-4.45103	8.554e-06	0.001493	0.01288	0.1276	-0.007927	0.0121	0.08889	0.533043	0.594	37	-	-	-
rs76252315	10	367258	C	T	0.01038	0.008039	0.07527	-0.03798	0.01249	0.07666	3.2558	0.001132	-0.001423	0.009923	0.04924	0.01297	0.02644	0.07898	-0.509654	0.6103	0.03494	0.01361	0.08559	-0.05276	0.01399	0.07222	4.49329	6.981e-06	32	-	-	-
rs74509340	10	480774	C	T	0.01793	0.008749	0.05914	-0.06469	0.01427	0.06636	4.93592	7.97e-07	0.01555	0.01068	0.04924	-0.03697	0.03047	0.06969	1.62664	0.1038	0.02581	0.01524	0.06306	-0.07175	0.01596	0.06	4.42096	9.788e-06	29	-	-	-
1:235418559	1	235418559	G	T	-0.003184	0.007303	0.08817	0.009244	0.01242	0.09382	-0.862577	0.3883	-0.01123	0.009028	0.09091	0.0909	0.0211	0.09466	-4.45006	8.558e-06	0.01217	0.01235	0.08709	-0.02466	0.01471	0.09222	1.91754	0.05519	2	-	-	-
rs1854462	10	91991941	C	T	-0.01594	0.007134	0.1022	0.04209	0.01103	0.1026	-4.41763	9.949e-06	-0.01807	0.008555	0.1136	0.01672	0.02007	0.1109	-1.59461	0.1108	-0.01061	0.01299	0.0976	0.05248	0.01308	0.08667	-3.42241	0.0006201	17	-	-	-
rs114248843	10	91995070	T	A	-0.01594	0.007134	0.1022	0.04209	0.01103	0.1026	-4.41763	9.949e-06	-0.01807	0.008555	0.1136	0.01672	0.02007	0.1109	-1.59461	0.1108	-0.01061	0.01299	0.0976	0.05248	0.01308	0.08667	-3.42241	0.0006201	5	-	-	-
rs7095209	10	106781929	A	G	0.004346	0.004367	0.414	-0.0112	0.006809	0.4249	1.92185	0.0546	0.009119	0.005489	0.428	-0.06449	0.01279	0.4251	5.28873	1.233e-07	-0.002956	0.00716	0.4084	0.006672	0.007747	0.4244	-0.912692	0.3614	25	-	-	-
rs7083262	10	106789694	C	T	0.003061	0.00447	0.3548	-0.01612	0.00708	0.368	2.29081	0.02199	0.008627	0.00565	0.3939	-0.05532	0.01314	0.3659	4.47081	7.836e-06	-0.004543	0.007258	0.3393	-0.001211	0.008223	0.3722	-0.303794	0.7613	24	-	-	-
rs116631300	10	120123809	A	G	-0.01641	0.009163	0.05484	0.05995	0.01418	0.05835	-4.52291	6.092e-06	-0.02822	0.01119	0.06818	0.05203	0.02463	0.05865	-2.96642	0.003009	0.01056	0.01586	0.04955	0.0671	0.01721	0.05778	-2.41588	0.0157	12	vascular endothelial growth factor measurement; coronary artery calcification, type II diabetes mellitus	Ahola-Olli AV, Am J Hum Genet, 2016; Divers J, BMC Genet, 2017	RP11-401E9.3; C1QL3
rs55729345	10	115390091	C	T	-0.009195	0.004375	0.3839	0.01913	0.007114	0.3898	-3.39156	0.0006953	-0.007022	0.005358	0.3674	0.05687	0.01263	0.4071	-4.65702	3.184e-06	-0.01491	0.007614	0.3904	0.003357	0.008375	0.3567	-1.61387	0.1066	21	-	-	-
rs56273432	10	115390182	C	T	-0.009195	0.004375	0.3839	0.01913	0.007114	0.3898	-3.39156	0.0006953	-0.007022	0.005358	0.3674	0.05687	0.01263	0.4071	-4.65702	3.184e-06	-0.01491	0.007614	0.3904	0.003357	0.008375	0.3567	-1.61387	0.1066	22	-	-	-
rs2270182	10	115392919	A	T	-0.009821	0.004435	0.3742	0.0198	0.007099	0.3791	-3.53874	0.0004026	-0.006788	0.005433	0.3636	0.05466	0.01264	0.3972	-4.46629	8.009e-06	-0.01769	0.007711	0.3784	0.0051	0.008363	0.3444	-2.00345	0.04516	19	-	-	-
rs112148169	10	133210477	A	T	-0.01253	0.008217	0.07527	0.05676	0.01295	0.07551	-4.51785	6.255e-06	-0.01017	0.01033	0.09091	0.07494	0.02274	0.07259	-3.40763	0.0006556	-0.01762	0.01351	0.06907	0.04568	0.01564	0.08111	-3.06284	0.002198	1	-	-	-
rs11043124	11	11184095	T	C	0.004369	0.004724	0.271	-0.02911	0.007616	0.2899	3.73561	0.0001871	-0.001033	0.005857	0.2803	-0.001969	0.01348	0.2979	0.0636845	0.9493	0.01323	0.007964	0.2673	-0.0429	0.009078	0.2744	4.64797	3.356e-06	3	-	-	-
rs11043125	11	11184154	T	C	0.004369	0.004724	0.271	-0.02911	0.007616	0.2899	3.73561	0.0001871	-0.001033	0.005857	0.2803	-0.001969	0.01348	0.2979	0.0636845	0.9493	0.01323	0.007964	0.2673	-0.0429	0.009078	0.2744	4.64797	3.356e-06	4	-	-	-
rs7105882	11	11187349	C	T	0.005671	0.004666	0.2806	-0.0242	0.00763	0.2998	3.33992	0.0008369	-9.479e-05	0.005778	0.2955	0.005112	0.01312	0.3089	-0.363198	0.7164	0.01504	0.007887	0.2748	-0.04031	0.009213	0.2822	4.56389	5.008e-06	17	-	-	-
rs10840599	11	11189231	T	C	0.005818	0.004686	0.2806	-0.02431	0.007629	0.2975	3.36504	0.000766	0.0006921	0.005795	0.2992	0.004693	0.01314	0.3095	-0.278593	0.7805	0.01392	0.007961	0.2733	-0.04033	0.009209	0.2744	4.45657	8.342e-06	2	-	-	-
rs885117	11	11189537	G	A	0.00441	0.004649	0.2957	-0.02397	0.007592	0.3097	3.18793	0.001435	-0.001615	0.00576	0.3106	0.003951	0.013	0.3217	-0.39145	0.6955	0.01417	0.007859	0.2898	-0.03951	0.009194	0.2867	4.43813	9.095e-06	19	-	-	-
rs1939309	11	100421331	T	C	0.01077	0.004964	0.7312	-0.03169	0.007591	0.7403	4.68138	2.844e-06	0.003735	0.006103	0.7273	-0.04419	0.01364	0.7422	3.20717	0.001341	0.0242	0.008479	0.7327	-0.02383	0.009057	0.7367	3.87134	0.0001084	15	diastolic blood pressure	Warren HR, Nat Genet, 2017	INS-IGF2
rs1939308	11	100421428	G	T	0.01054	0.004883	0.7129	-0.02947	0.007439	0.7296	4.49629	6.917e-06	0.004116	0.005967	0.697	-0.03857	0.01367	0.7317	2.86184	0.004205	0.02295	0.008453	0.7192	-0.02387	0.008803	0.7256	3.83634	0.0001248	14	diastolic blood pressure	Warren HR, Nat Genet, 2017	INS-IGF2
rs891290	11	119245010	A	T	-0.01054	0.008463	0.08065	0.03919	0.01235	0.06903	-3.32165	0.0008932	0.006251	0.01053	0.07955	0.02342	0.02357	0.06911	-0.665073	0.506	-0.04382	0.01404	0.08108	0.04519	0.01436	0.06889	-4.43208	9.334e-06	20	-	-	-
rs12797802	11	132031224	C	T	-0.01093	0.004466	0.3333	0.01788	0.007012	0.3211	-3.46547	0.0005305	-0.006265	0.005533	0.322	-0.01865	0.01365	0.3287	0.840871	0.4003	-0.01936	0.007539	0.3378	0.03027	0.00799	0.3067	-4.51786	6.243e-06	10	-	-	-
rs7358623	12	59151544	G	A	-0.0131	0.004409	0.3344	0.01741	0.007088	0.3623	-3.65503	0.0002573	-0.006826	0.005516	0.3409	-0.006184	0.01369	0.3537	-0.0434975	0.9653	-0.02326	0.007297	0.3318	0.02581	0.008162	0.3789	-4.48199	7.421e-06	5	-	-	-
rs11067175	12	115013760	A	T	-0.005256	0.006694	0.1161	0.03232	0.01064	0.1182	-2.9892	0.002803	0.009892	0.008608	0.07955	0.003849	0.02366	0.1115	0.240018	0.8103	-0.03146	0.01049	0.1306	0.04093	0.01182	0.1311	-4.58061	4.638e-06	2	atrial fibrillation	Roselli C, Nat Genet, 2018	RN7SL676P; RPL30P11; ATF7IP
rs57884356	13	50133656	C	G	-0.005704	0.008822	0.04946	0.03447	0.01465	0.06217	-2.3492	0.01879	-0.01108	0.01068	0.04545	0.1186	0.02728	0.06504	-4.42653	9.507e-06	0.00559	0.01566	0.05105	0.004216	0.01692	0.05667	0.0595972	0.9525	39	cardiac hypertrophy	Parsa A, Clin Transl Sci, 2011	GXYLT1P1
rs112017404	13	50165471	T	C	-0.01129	0.007786	0.08065	0.0286	0.01223	0.08467	-2.7514	0.005951	-0.016	0.00965	0.06061	0.1202	0.02396	0.08479	-5.27288	1.349e-07	0.001335	0.01313	0.08859	0.003041	0.01384	0.08444	-0.0894258	0.9288	2	cardiac hypertrophy	Parsa A, Clin Transl Sci, 2011	GXYLT1P1
rs144170770	13	50169651	G	A	-0.01129	0.007786	0.08065	0.0286	0.01223	0.08467	-2.7514	0.005951	-0.016	0.00965	0.06061	0.1202	0.02396	0.08479	-5.27288	1.349e-07	0.001335	0.01313	0.08859	0.003041	0.01384	0.08444	-0.0894258	0.9288	7	cardiac hypertrophy	Parsa A, Clin Transl Sci, 2011	GXYLT1P1
rs4941649	13	50170562	C	A	-0.01129	0.007786	0.07957	0.02822	0.0123	0.08467	-2.71412	0.006636	-0.016	0.00965	0.06061	0.1202	0.02396	0.08479	-5.27288	1.349e-07	0.001335	0.01313	0.08709	0.001923	0.01393	0.08444	-0.0307167	0.9755	36	cardiac hypertrophy	Parsa A, Clin Transl Sci, 2011	GXYLT1P1
rs4942852	13	50172436	G	A	-0.01094	0.0078	0.08172	0.02631	0.01219	0.08429	-2.57395	0.01004	-0.01544	0.009675	0.06439	0.1059	0.02384	0.0842	-4.71619	2.423e-06	0.001335	0.01313	0.08859	0.003041	0.01384	0.08444	-0.0894258	0.9288	37	cardiac hypertrophy	Parsa A, Clin Transl Sci, 2011	GXYLT1P1
rs186255622	13	50358384	A	T	-0.02509	0.009327	0.05161	0.03095	0.01573	0.05568	-3.06442	0.002176	-0.02773	0.01165	0.05303	0.1083	0.02809	0.05459	-4.47319	7.668e-06	-0.01838	0.01551	0.05105	-0.004329	0.0185	0.05778	-0.582028	0.5607	16	-	-	-
rs2639514	13	83633344	T	A	0.01833	0.006174	0.8484	-0.01344	0.009201	0.8654	2.86721	0.004147	0.02464	0.008127	0.8598	-0.06224	0.01697	0.8815	4.61743	3.885e-06	0.009417	0.009513	0.8438	0.003479	0.01069	0.8344	0.414957	0.6781	24	-	-	-
rs1388984	13	83645801	T	C	0.01739	0.006145	0.8441	-0.01564	0.009211	0.8627	2.98303	0.002855	0.02332	0.008108	0.8485	-0.06556	0.01654	0.8804	4.82508	1.408e-06	0.009514	0.009452	0.8423	0.002654	0.01078	0.8289	0.478483	0.6323	4	-	-	-
rs2639471	13	83647538	G	A	0.01739	0.006145	0.8441	-0.01564	0.009211	0.8627	2.98303	0.002855	0.02332	0.008108	0.8485	-0.06556	0.01654	0.8804	4.82508	1.408e-06	0.009514	0.009452	0.8423	0.002654	0.01078	0.8289	0.478483	0.6323	23	-	-	-
rs1492727	13	83651664	G	C	0.01682	0.00612	0.8441	-0.01518	0.009139	0.8604	2.90938	0.003624	0.02298	0.008053	0.8409	-0.06169	0.01599	0.8775	4.72928	2.245e-06	0.008391	0.009443	0.8453	0.003476	0.01083	0.8278	0.342063	0.7323	11	-	-	-
rs1907811	13	83654140	T	G	0.01739	0.006145	0.8462	-0.01531	0.00924	0.8627	2.9468	0.003205	0.02332	0.008108	0.8485	-0.06556	0.01654	0.8804	4.82508	1.408e-06	0.009514	0.009452	0.8453	0.003476	0.01083	0.8289	0.420046	0.6744	17	-	-	-
rs2262463	13	83655252	T	C	0.01647	0.006419	0.8613	-0.01654	0.009623	0.8757	2.8537	0.004313	0.02364	0.008473	0.8636	-0.06474	0.0176	0.8926	4.52457	6.049e-06	0.00652	0.009866	0.8604	0.0001085	0.01122	0.8433	0.429128	0.6678	21	-	-	-
rs265704	13	83669281	C	T	0.01724	0.006141	0.843	-0.0169	0.009192	0.8623	3.0883	0.002013	0.02332	0.008108	0.8485	-0.06556	0.01654	0.8804	4.82508	1.408e-06	0.009272	0.009441	0.8408	0.000901	0.01076	0.8278	0.584784	0.5587	29	-	-	-
rs2996568	13	83686781	T	C	0.01841	0.006274	0.1516	-0.01541	0.009269	0.1331	3.0216	0.002513	0.02429	0.008294	0.1477	-0.06501	0.01666	0.115	4.7984	1.607e-06	0.01082	0.009636	0.1532	0.003027	0.01085	0.1678	0.537033	0.5911	35	-	-	-
rs265676	13	83687737	C	T	0.01827	0.006279	0.1516	-0.01541	0.009269	0.1327	3.00834	0.00262	0.02429	0.008294	0.1477	-0.06501	0.01666	0.115	4.7984	1.607e-06	0.01035	0.00965	0.1532	0.003027	0.01085	0.1667	0.504321	0.6139	26	-	-	-
rs265677	13	83688524	A	G	0.01827	0.006279	0.1516	-0.01541	0.009269	0.1327	3.00834	0.00262	0.02429	0.008294	0.1477	-0.06501	0.01666	0.115	4.7984	1.607e-06	0.01035	0.00965	0.1532	0.003027	0.01085	0.1667	0.504321	0.6139	27	-	-	-
rs265678	13	83689060	C	T	0.01827	0.006279	0.1516	-0.01541	0.009269	0.1327	3.00834	0.00262	0.02429	0.008294	0.1477	-0.06501	0.01666	0.115	4.7984	1.607e-06	0.01035	0.00965	0.1532	0.003027	0.01085	0.1667	0.504321	0.6139	28	-	-	-
rs2137437	13	83706474	C	T	0.01868	0.006278	0.1505	-0.01413	0.009288	0.1327	2.92666	0.003431	0.02478	0.008305	0.1477	-0.06501	0.01666	0.1144	4.82346	1.417e-06	0.01082	0.009636	0.1517	0.00482	0.01087	0.1678	0.413048	0.6795	18	-	-	-
rs2669204	13	83709021	A	C	0.01868	0.006278	0.1505	-0.01413	0.009288	0.1327	2.92666	0.003431	0.02478	0.008305	0.1477	-0.06501	0.01666	0.1144	4.82346	1.417e-06	0.01082	0.009636	0.1517	0.00482	0.01087	0.1678	0.413048	0.6795	30	-	-	-
rs2819241	13	83709519	C	T	0.01901	0.006096	0.157	-0.01657	0.008981	0.1396	3.27791	0.001046	0.02553	0.00799	0.1515	-0.06166	0.01616	0.1231	4.83654	1.327e-06	0.009877	0.009451	0.1592	0.0002706	0.01053	0.1711	0.678932	0.4972	32	-	-	-
rs1828632	13	83710918	C	G	0.01868	0.006278	0.1505	-0.01413	0.009288	0.1327	2.92666	0.003431	0.02478	0.008305	0.1477	-0.06501	0.01666	0.1144	4.82346	1.417e-06	0.01082	0.009636	0.1517	0.00482	0.01087	0.1678	0.413048	0.6795	14	-	-	-
rs2175644	13	83711342	A	T	0.01804	0.006075	0.157	-0.01657	0.008981	0.14	3.19201	0.001409	0.02381	0.007943	0.1515	-0.06166	0.01616	0.1237	4.7466	2.081e-06	0.009877	0.009451	0.1592	0.0002706	0.01053	0.1711	0.678932	0.4972	19	-	-	-
rs2257208	13	83713133	T	C	0.01636	0.006277	0.1505	-0.01413	0.009288	0.1316	2.71985	0.006541	0.02084	0.008283	0.1477	-0.06501	0.01666	0.1138	4.61423	3.965e-06	0.01065	0.009663	0.1517	0.00482	0.01087	0.1656	0.40085	0.6884	20	-	-	-
rs2669209	13	83714499	A	C	0.01681	0.006094	0.157	-0.01657	0.008981	0.1384	3.07555	0.002098	0.02187	0.007971	0.1515	-0.06166	0.01616	0.1225	4.63568	3.58e-06	0.009707	0.009475	0.1592	0.0002706	0.01053	0.1689	0.666162	0.5053	31	-	-	-
rs2819251	13	83716171	A	G	0.01681	0.006094	0.157	-0.01657	0.008981	0.1384	3.07555	0.002098	0.02187	0.007971	0.1515	-0.06166	0.01616	0.1225	4.63568	3.58e-06	0.009707	0.009475	0.1592	0.0002706	0.01053	0.1689	0.666162	0.5053	33	-	-	-
rs9531489	13	84254985	A	G	0.01818	0.005124	0.2054	-0.02814	0.008232	0.2128	4.777	1.783e-06	0.02297	0.006312	0.1894	-0.02625	0.01621	0.2247	2.82946	0.004657	0.008705	0.008775	0.2117	-0.02885	0.009474	0.19	2.90821	0.003637	44	-	-	-
rs9546478	13	84256323	A	C	0.01814	0.005128	0.2011	-0.02777	0.008311	0.2109	4.70114	2.584e-06	0.02342	0.006314	0.1894	-0.02625	0.01621	0.2224	2.85521	0.004294	0.007719	0.008784	0.2057	-0.02829	0.009596	0.1889	2.76794	0.005635	46	-	-	-
rs9546479	13	84256394	C	T	0.01542	0.004824	0.2634	-0.02944	0.007647	0.2696	4.9616	7.011e-07	0.01803	0.005993	0.2462	-0.03257	0.01471	0.2816	3.1856	0.001447	0.009056	0.008135	0.2703	-0.02955	0.008865	0.2467	3.20864	0.001333	47	-	-	-
rs7492237	13	84258581	T	C	0.01542	0.004824	0.2634	-0.02944	0.007647	0.2696	4.9616	7.011e-07	0.01803	0.005993	0.2462	-0.03257	0.01471	0.2816	3.1856	0.001447	0.009056	0.008135	0.2703	-0.02955	0.008865	0.2467	3.20864	0.001333	40	-	-	-
rs2329285	13	84258896	T	G	0.01814	0.005128	0.2011	-0.02777	0.008311	0.2109	4.70114	2.584e-06	0.02342	0.006314	0.1894	-0.02625	0.01621	0.2224	2.85521	0.004294	0.007719	0.008784	0.2057	-0.02829	0.009596	0.1889	2.76794	0.005635	22	-	-	-
rs9531490	13	84261739	A	G	0.01667	0.004951	0.2323	-0.02635	0.008007	0.2407	4.56976	4.879e-06	0.02162	0.006096	0.2197	-0.03292	0.01583	0.2561	3.2152	0.001302	0.006225	0.008507	0.2372	-0.02462	0.009195	0.2111	2.46235	0.01379	45	-	-	-
rs17077104	13	84278490	C	T	0.018	0.005127	0.2054	-0.02814	0.008232	0.2117	4.75766	1.954e-06	0.0232	0.006313	0.1894	-0.02625	0.01621	0.2236	2.84262	0.004471	0.007844	0.008784	0.2117	-0.02885	0.009474	0.1889	2.84019	0.00451	13	-	-	-
rs76474731	13	83716572	T	G	0.01636	0.006277	0.1505	-0.01413	0.009288	0.1316	2.71985	0.006541	0.02084	0.008283	0.1477	-0.06501	0.01666	0.1138	4.61423	3.965e-06	0.01065	0.009663	0.1517	0.00482	0.01087	0.1656	0.40085	0.6884	41	-	-	-
rs265643	13	83722227	A	T	0.01636	0.006277	0.1505	-0.01413	0.009288	0.1316	2.71985	0.006541	0.02084	0.008283	0.1477	-0.06501	0.01666	0.1138	4.61423	3.965e-06	0.01065	0.009663	0.1517	0.00482	0.01087	0.1656	0.40085	0.6884	25	-	-	-
rs970635	14	40123072	C	T	0.01077	0.00435	0.5032	-0.02534	0.006746	0.4836	4.49863	6.853e-06	0.01644	0.005409	0.4962	-0.02524	0.01348	0.489	2.86959	0.004102	-0.0008181	0.007275	0.506	-0.02459	0.007726	0.4733	2.24007	0.0251	27	-	-	-
rs8019297	14	40138562	C	T	0.01082	0.004325	0.5118	-0.02482	0.006784	0.4958	4.42987	9.449e-06	0.01554	0.005339	0.5076	-0.02966	0.01307	0.5058	3.20149	0.001367	0.001351	0.007355	0.5135	-0.02265	0.007868	0.4767	2.22842	0.02585	25	-	-	-
rs17109607	14	40145606	T	C	0.01093	0.004369	0.4903	-0.02536	0.006779	0.4809	4.49973	6.815e-06	0.01629	0.005403	0.4886	-0.02509	0.01326	0.4884	2.88996	0.003846	-0.0001405	0.00739	0.491	-0.02479	0.007821	0.4667	2.29082	0.02199	13	-	-	-
rs56382477	14	40147348	T	C	0.01093	0.004369	0.4903	-0.02536	0.006779	0.4809	4.49973	6.815e-06	0.01629	0.005403	0.4886	-0.02509	0.01326	0.4884	2.88996	0.003846	-0.0001405	0.00739	0.491	-0.02479	0.007821	0.4667	2.29082	0.02199	21	-	-	-
rs1950629	14	40148761	A	G	0.01068	0.00437	0.4903	-0.02536	0.006779	0.4802	4.46843	7.872e-06	0.01594	0.005405	0.4886	-0.02509	0.01326	0.4872	2.86537	0.004162	-0.0001405	0.00739	0.491	-0.02479	0.007821	0.4667	2.29082	0.02199	14	-	-	-
rs1546993	14	40153203	A	G	0.0128	0.004325	0.5118	-0.02558	0.006809	0.4947	4.75796	1.961e-06	0.01669	0.005328	0.5076	-0.02966	0.01307	0.5029	3.28391	0.001022	0.004924	0.007383	0.5135	-0.02356	0.007909	0.4789	2.63266	0.008463	12	-	-	-
rs2819255	13	83723963	A	G	0.01681	0.006094	0.157	-0.01657	0.008981	0.1384	3.07555	0.002098	0.02187	0.007971	0.1515	-0.06166	0.01616	0.1225	4.63568	3.58e-06	0.009707	0.009475	0.1592	0.0002706	0.01053	0.1689	0.666162	0.5053	34	-	-	-
rs201818410	14	47817368	G	A	-0.003721	0.004949	0.2505	0.03285	0.007841	0.2479	-3.94415	8.016e-05	0.003775	0.006158	0.1932	0.02325	0.01581	0.2445	-1.14782	0.2511	-0.01823	0.008245	0.2733	0.03653	0.009016	0.2544	-4.48208	7.385e-06	17	-	-	-
rs1956135	14	40159598	A	T	0.01168	0.00433	0.5183	-0.02427	0.006857	0.4958	4.43296	9.325e-06	0.01571	0.005338	0.5114	-0.03157	0.01315	0.5046	3.33142	0.000865	0.003467	0.007385	0.521	-0.02114	0.007964	0.4789	2.26561	0.02348	15	-	-	-
rs1956136	14	40159629	G	A	0.01168	0.00433	0.5183	-0.02427	0.006857	0.4958	4.43296	9.325e-06	0.01571	0.005338	0.5114	-0.03157	0.01315	0.5046	3.33142	0.000865	0.003467	0.007385	0.521	-0.02114	0.007964	0.4789	2.26561	0.02348	16	-	-	-
rs4902252	14	64347625	C	T	0.007099	0.004263	0.628	-0.01158	0.006774	0.6342	2.33378	0.01963	0.01315	0.005225	0.6932	-0.04909	0.01225	0.6376	4.67345	2.95e-06	-0.00532	0.007323	0.6021	0.0004347	0.007981	0.6278	-0.53129	0.5953	19	-	-	-
rs7153723	14	64347631	C	G	0.007099	0.004263	0.628	-0.01158	0.006774	0.6342	2.33378	0.01963	0.01315	0.005225	0.6932	-0.04909	0.01225	0.6376	4.67345	2.95e-06	-0.00532	0.007323	0.6021	0.0004347	0.007981	0.6278	-0.53129	0.5953	23	-	-	-
rs12435958	14	64352150	C	G	0.006909	0.004262	0.6032	-0.01502	0.006735	0.6205	2.75136	0.00593	0.01402	0.00519	0.6629	-0.05174	0.0122	0.6249	4.96	7.007e-07	-0.008391	0.007409	0.5796	-0.003993	0.007919	0.6122	-0.40555	0.685	7	-	-	-
rs2357001	14	64352814	G	A	0.006909	0.004262	0.6022	-0.01486	0.006745	0.6205	2.72839	0.006354	0.01402	0.00519	0.6629	-0.05174	0.0122	0.6249	4.96	7.007e-07	-0.008391	0.007409	0.5781	-0.003634	0.007936	0.6122	-0.438152	0.6613	18	-	-	-
rs12894053	14	64353440	C	A	0.007473	0.004409	0.643	-0.01512	0.006904	0.6571	2.75802	0.005813	0.01487	0.005423	0.7045	-0.04734	0.0129	0.6632	4.44563	8.772e-06	-0.00753	0.007509	0.6186	-0.006166	0.00807	0.6456	-0.12374	0.9015	8	-	-	-
rs12895879	14	64353738	C	T	0.00687	0.004258	0.6022	-0.01486	0.006745	0.6201	2.72423	0.006433	0.01394	0.005182	0.6629	-0.05174	0.0122	0.6243	4.95514	7.185e-07	-0.008391	0.007409	0.5781	-0.003634	0.007936	0.6122	-0.438152	0.6613	10	-	-	-
rs12894864	14	64353862	G	A	0.007956	0.004451	0.6527	-0.01382	0.006915	0.6682	2.64797	0.008102	0.01538	0.005492	0.7083	-0.04808	0.01286	0.6731	4.53817	5.686e-06	-0.006599	0.007535	0.6306	-0.003866	0.008074	0.6589	-0.247469	0.8045	9	-	-	-
rs11158732	14	68825191	C	A	-0.005343	0.004301	0.4022	0.01694	0.006711	0.4458	-2.79552	0.005183	0.00426	0.005427	0.4432	-0.005293	0.01242	0.4297	0.704815	0.4808	-0.02128	0.006992	0.3859	0.02741	0.007874	0.4767	-4.62378	3.765e-06	3	-	-	-
rs8004989	14	64354638	T	C	0.006461	0.004263	0.6011	-0.01538	0.006722	0.6205	2.74391	0.006075	0.01354	0.005189	0.6629	-0.05174	0.0122	0.6254	4.92394	8.427e-07	-0.008788	0.007417	0.5766	-0.004469	0.007904	0.6111	-0.398466	0.6903	24	-	-	-
rs945031	14	64355183	C	T	0.006265	0.00424	0.557	-0.01708	0.0066	0.5896	2.97594	0.002924	0.0121	0.005214	0.625	-0.04844	0.01254	0.6005	4.45777	8.32e-06	-0.004937	0.00726	0.53	-0.009045	0.007674	0.5689	0.388868	0.6974	26	-	-	-
rs10873486	14	98256752	C	T	0.01269	0.004571	0.3441	-0.01148	0.007275	0.3238	2.81314	0.004909	0.00148	0.005811	0.3598	-0.0005689	0.01326	0.3142	0.141524	0.8874	0.03305	0.007274	0.3378	-0.01681	0.008624	0.3422	4.41941	9.9e-06	2	-	-	-
rs1000904	14	64361496	A	T	0.007473	0.004319	0.5882	-0.01607	0.00671	0.6209	2.95031	0.003179	0.01374	0.005324	0.6477	-0.04726	0.01272	0.6318	4.42374	9.719e-06	-0.004209	0.007353	0.5646	-0.007923	0.007797	0.6	0.346544	0.7289	1	-	-	-
rs11851487	14	88284233	A	T	-0.01789	0.004557	0.3656	0.01104	0.006793	0.3398	-3.53671	0.0004057	-0.02055	0.005629	0.3485	0.04171	0.01282	0.3339	-4.44671	8.781e-06	-0.01111	0.007746	0.3724	-0.0007723	0.007858	0.3511	-0.936897	0.349	6	-	-	-
rs60889063	16	54371831	G	A	0.01146	0.005127	0.2333	-0.03184	0.007912	0.2349	4.59274	4.386e-06	0.008125	0.006334	0.2538	-0.02263	0.01456	0.2422	1.93695	0.05274	0.01478	0.008728	0.2252	-0.03349	0.009379	0.2211	3.7676	0.000165	5	-	-	-
rs77506474	16	6068251	G	A	-0.006744	0.006336	0.1301	0.02301	0.01033	0.1281	-2.45529	0.01411	-0.008612	0.008108	0.1136	0.08643	0.01948	0.1214	-4.50436	6.677e-06	-0.003132	0.01011	0.1366	0.001709	0.01188	0.1411	-0.310329	0.7563	9	intraocular pressure measurement; smoking behavior, 3-hydroxypropylmercapturic acid measurement	Ozel AB, Hum Genet, 2013; Park SL, PLoS One, 2015	HBA2; LA16c-349E10.1
rs73522138	16	6069280	A	G	-0.006533	0.006341	0.1301	0.02301	0.01033	0.1278	-2.43735	0.01483	-0.008271	0.008119	0.1136	0.08643	0.01948	0.1208	-4.4873	7.235e-06	-0.003132	0.01011	0.1366	0.001709	0.01188	0.1411	-0.310329	0.7563	6	intraocular pressure measurement; smoking behavior, 3-hydroxypropylmercapturic acid measurement	Ozel AB, Hum Genet, 2013; Park SL, PLoS One, 2015	HBA2; LA16c-349E10.1
rs934166	16	84631300	G	A	-0.004917	0.004241	0.4817	0.03034	0.006422	0.4771	-4.58122	4.633e-06	-0.009406	0.005214	0.4848	0.0291	0.01229	0.4861	-2.88428	0.003915	0.004707	0.007265	0.4805	0.03199	0.007448	0.46	-2.62224	0.008737	10	-	-	-
rs12444312	16	87097284	A	G	-0.01431	0.008253	0.06559	0.06526	0.01315	0.07246	-5.12519	2.951e-07	-0.009198	0.009837	0.06061	0.07452	0.0238	0.08072	-3.25083	0.001153	-0.0307	0.01527	0.06757	0.05802	0.01566	0.05667	-4.05623	4.994e-05	2	congenital left-sided heart lesions	Mitchell LE, Hum Mol Genet, 2014	RP11-616M22.10
rs11657498	17	6983315	T	G	-0.01924	0.007412	0.07849	0.04719	0.01242	0.09649	-4.59293	4.346e-06	-0.01318	0.008731	0.1061	0.03907	0.02111	0.1086	-2.28722	0.02219	-0.03892	0.01422	0.06757	0.05122	0.01535	0.07333	-4.30789	1.649e-05	7	congenital heart disease	Agopian AJ, Circ Cardiovasc Genet, 2017	CTB-162E12.1
rs55835902	17	6983467	G	A	-0.01924	0.007412	0.07849	0.04719	0.01242	0.09649	-4.59293	4.346e-06	-0.01318	0.008731	0.1061	0.03907	0.02111	0.1086	-2.28722	0.02219	-0.03892	0.01422	0.06757	0.05122	0.01535	0.07333	-4.30789	1.649e-05	17	congenital heart disease	Agopian AJ, Circ Cardiovasc Genet, 2017	CTB-162E12.1
rs11653290	17	6983529	C	A	-0.01935	0.007422	0.07849	0.04719	0.01242	0.09611	-4.5989	4.224e-06	-0.01327	0.008747	0.1061	0.03907	0.02111	0.108	-2.29055	0.022	-0.03892	0.01422	0.06757	0.05122	0.01535	0.07333	-4.30789	1.649e-05	6	congenital heart disease	Agopian AJ, Circ Cardiovasc Genet, 2017	CTB-162E12.1
rs74032742	16	78725080	G	A	-0.00824	0.007791	0.06452	0.009795	0.01406	0.07895	-1.12198	0.2618	-0.01975	0.009405	0.07576	0.09588	0.02257	0.08537	-4.72902	2.257e-06	0.01549	0.01387	0.06006	-0.03659	0.01712	0.06667	2.36368	0.0181	7	peripheral arterial disease, traffic air pollution measurement; idiopathic dilated cardiomyopathy	Ward-Caviness CK, PLoS One, 2016; Xu H, J Pers Med, 2018	LA16c-306A4.2; RP11-161M6.2; SOX8; RP11-304L19.1
rs8067970	17	35145662	A	G	0.0213	0.007503	0.1	-0.04196	0.01139	0.09191	4.63811	3.519e-06	0.02209	0.009865	0.1326	-0.04183	0.01826	0.08304	3.07983	0.002071	0.01966	0.01152	0.08709	-0.04293	0.01458	0.1089	3.36833	0.0007584	23	macrophage inflammatory protein 1b measurement	Ahola-Olli AV, Am J Hum Genet, 2016	AL450226.2
rs116720528	17	40505531	A	T	-0.01255	0.008327	0.08172	0.03539	0.0125	0.06979	-3.19183	0.001411	0.0018	0.01057	0.07955	-0.02339	0.02488	0.06852	0.931852	0.3513	-0.0347	0.01339	0.08258	0.05492	0.01415	0.07222	-4.60035	4.244e-06	9	pulse pressure measurement	Warren HR, Nat Genet, 2017	CTD-3060P21.1; OR1E3
rs7215170	17	40814212	C	A	-0.006075	0.007417	0.09677	0.03353	0.01144	0.08963	-2.90487	0.003666	0.00905	0.009207	0.1023	-0.005219	0.02165	0.08943	0.60651	0.5441	-0.03408	0.01237	0.09459	0.04825	0.01327	0.09	-4.53824	5.677e-06	18	-	-	-
rs7225801	17	41060364	G	A	-0.006155	0.007235	0.1108	0.03692	0.01066	0.1014	-3.34346	0.0008254	0.002958	0.00962	0.1136	-0.008625	0.01941	0.08943	0.534687	0.5928	-0.01846	0.01094	0.1096	0.0564	0.0125	0.1244	-4.50658	6.617e-06	19	-	-	-
rs10401037	17	52235347	G	C	0.006795	0.004997	0.2613	-0.03491	0.007507	0.2227	4.62462	3.76e-06	0.01119	0.006488	0.2273	-0.02705	0.01484	0.205	2.36103	0.01823	0.001599	0.007838	0.2748	-0.03576	0.008665	0.2567	3.19744	0.001385	3	-	-	-
rs73994621	17	64784939	C	T	-0.01293	0.004525	0.3505	0.02676	0.007121	0.3341	-4.70424	2.559e-06	-0.00761	0.005533	0.3788	0.0284	0.01377	0.3362	-2.42654	0.01522	-0.02356	0.007833	0.3393	0.02497	0.008274	0.33	-4.25939	2.046e-05	20	systolic blood pressure, smoking behaviour measurement	Taylor JY, Sci Rep, 2016	BHLHA9
rs2228945	17	64785022	A	G	-0.01308	0.004522	0.3473	0.02631	0.007104	0.3333	-4.67752	2.893e-06	-0.007852	0.005527	0.3788	0.0284	0.01377	0.3351	-2.44322	0.01454	-0.02356	0.007833	0.3348	0.02435	0.00825	0.33	-4.21142	2.541e-05	13	systolic blood pressure, smoking behaviour measurement	Taylor JY, Sci Rep, 2016	BHLHA9
rs9898776	17	64785203	A	G	-0.01293	0.004525	0.3473	0.02631	0.007104	0.3341	-4.65882	3.185e-06	-0.00761	0.005533	0.3788	0.0284	0.01377	0.3362	-2.42654	0.01522	-0.02356	0.007833	0.3348	0.02435	0.00825	0.33	-4.21142	2.541e-05	24	systolic blood pressure, smoking behaviour measurement	Taylor JY, Sci Rep, 2016	BHLHA9
rs9904795	17	64785493	A	G	-0.01293	0.004525	0.3473	0.02631	0.007104	0.3341	-4.65882	3.185e-06	-0.00761	0.005533	0.3788	0.0284	0.01377	0.3362	-2.42654	0.01522	-0.02356	0.007833	0.3348	0.02435	0.00825	0.33	-4.21142	2.541e-05	26	systolic blood pressure, smoking behaviour measurement	Taylor JY, Sci Rep, 2016	BHLHA9
rs9904689	17	64785689	G	A	-0.01293	0.004525	0.3473	0.02631	0.007104	0.3341	-4.65882	3.185e-06	-0.00761	0.005533	0.3788	0.0284	0.01377	0.3362	-2.42654	0.01522	-0.02356	0.007833	0.3348	0.02435	0.00825	0.33	-4.21142	2.541e-05	25	systolic blood pressure, smoking behaviour measurement	Taylor JY, Sci Rep, 2016	BHLHA9
rs9905531	17	64785767	A	G	-0.01293	0.004525	0.3473	0.02631	0.007104	0.3341	-4.65882	3.185e-06	-0.00761	0.005533	0.3788	0.0284	0.01377	0.3362	-2.42654	0.01522	-0.02356	0.007833	0.3348	0.02435	0.00825	0.33	-4.21142	2.541e-05	27	systolic blood pressure, smoking behaviour measurement	Taylor JY, Sci Rep, 2016	BHLHA9
rs4791040	17	64787573	C	T	-0.01293	0.004525	0.3505	0.02676	0.007121	0.3341	-4.70424	2.559e-06	-0.00761	0.005533	0.3788	0.0284	0.01377	0.3362	-2.42654	0.01522	-0.02356	0.007833	0.3393	0.02497	0.008274	0.33	-4.25939	2.046e-05	16	systolic blood pressure, smoking behaviour measurement	Taylor JY, Sci Rep, 2016	BHLHA9
rs4791039	17	64787600	A	G	-0.01342	0.004519	0.3505	0.02676	0.007121	0.3349	-4.76413	1.895e-06	-0.008352	0.005522	0.3788	0.0284	0.01377	0.3374	-2.47723	0.01322	-0.02356	0.007833	0.3393	0.02497	0.008274	0.33	-4.25939	2.046e-05	15	systolic blood pressure, smoking behaviour measurement	Taylor JY, Sci Rep, 2016	BHLHA9
17:64787606	17	64787606	A	G	-0.01342	0.004519	0.3505	0.02676	0.007121	0.3349	-4.76413	1.895e-06	-0.008352	0.005522	0.3788	0.0284	0.01377	0.3374	-2.47723	0.01322	-0.02356	0.007833	0.3393	0.02497	0.008274	0.33	-4.25939	2.046e-05	2	systolic blood pressure, smoking behaviour measurement	Taylor JY, Sci Rep, 2016	BHLHA9
rs4791037	17	64787894	G	A	-0.01293	0.004525	0.3473	0.02631	0.007104	0.3341	-4.65882	3.185e-06	-0.00761	0.005533	0.3788	0.0284	0.01377	0.3362	-2.42654	0.01522	-0.02356	0.007833	0.3348	0.02435	0.00825	0.33	-4.21142	2.541e-05	14	systolic blood pressure, smoking behaviour measurement	Taylor JY, Sci Rep, 2016	BHLHA9
rs16960228	17	64788827	A	G	-0.01293	0.004525	0.3473	0.02631	0.007104	0.3341	-4.65882	3.185e-06	-0.00761	0.005533	0.3788	0.0284	0.01377	0.3362	-2.42654	0.01522	-0.02356	0.007833	0.3348	0.02435	0.00825	0.33	-4.21142	2.541e-05	12	systolic blood pressure, smoking behaviour measurement	Taylor JY, Sci Rep, 2016	BHLHA9
17:21509395	17	21509395	T	C	-0.01453	0.007705	0.09032	0.04865	0.0116	0.08581	-4.53691	5.733e-06	-0.01945	0.009552	0.08712	0.06897	0.02208	0.09059	-3.67535	0.0002378	-0.005584	0.01301	0.09159	0.04225	0.01349	0.07667	-2.55232	0.01067	1	-	-	-
rs9949325	18	8641331	G	A	-0.01212	0.006282	0.1301	0.01055	0.01017	0.135	-1.89647	0.05798	-0.01798	0.00765	0.1591	0.06849	0.01798	0.1434	-4.42533	9.59e-06	0.002064	0.01101	0.1186	-0.01321	0.01201	0.1189	0.937461	0.3484	36	-	-	-
rs2160909	18	8645907	T	C	-0.007202	0.007142	0.08172	0.01901	0.01239	0.1014	-1.83287	0.06683	-0.01429	0.008527	0.1136	0.08323	0.01959	0.1103	-4.5644	5.005e-06	0.01191	0.01312	0.06907	-0.0162	0.01545	0.08444	1.38684	0.1655	18	-	-	-
rs9960217	18	8648368	T	C	-0.007202	0.007142	0.08172	0.01901	0.01239	0.1014	-1.83287	0.06683	-0.01429	0.008527	0.1136	0.08323	0.01959	0.1103	-4.5644	5.005e-06	0.01191	0.01312	0.06907	-0.0162	0.01545	0.08444	1.38684	0.1655	37	-	-	-
rs9304018	18	8652809	C	T	-0.006062	0.006746	0.08925	0.02149	0.01199	0.1167	-2.00269	0.04519	-0.01297	0.008122	0.1212	0.08637	0.01903	0.1272	-4.80118	1.569e-06	0.011	0.01216	0.07658	-0.01224	0.01487	0.09667	1.20985	0.2264	32	-	-	-
rs9304019	18	8652881	A	G	-0.006062	0.006746	0.08925	0.02149	0.01199	0.1167	-2.00269	0.04519	-0.01297	0.008122	0.1212	0.08637	0.01903	0.1272	-4.80118	1.569e-06	0.011	0.01216	0.07658	-0.01224	0.01487	0.09667	1.20985	0.2264	33	-	-	-
rs9304020	18	8652965	A	G	-0.005742	0.006753	0.08925	0.02149	0.01199	0.1163	-1.97894	0.0478	-0.01251	0.008134	0.1212	0.08637	0.01903	0.1266	-4.77786	1.76e-06	0.011	0.01216	0.07658	-0.01224	0.01487	0.09667	1.20985	0.2264	34	-	-	-
rs551160836	18	41413084	G	T	-0.01396	0.008543	0.07849	0.05836	0.01195	0.06941	-4.9232	8.488e-07	-0.009653	0.01099	0.06061	0.04536	0.02436	0.06504	-2.05854	0.03956	-0.02188	0.0135	0.08559	0.06198	0.01359	0.07778	-4.37783	1.203e-05	21	ICAM-1 measurement	Comuzzie AG, PLoS One, 2012	RP11-703M24.5
rs9304021	18	8652971	C	T	-0.004493	0.006668	0.09032	0.02096	0.01194	0.1213	-1.86118	0.06267	-0.009598	0.008044	0.1212	0.08637	0.01903	0.1318	-4.64505	3.383e-06	0.008384	0.01198	0.07808	-0.01273	0.01476	0.1011	1.11068	0.2666	35	-	-	-
rs11663276	18	8653957	T	G	-0.001918	0.006389	0.1108	0.02229	0.01086	0.1323	-1.92128	0.05476	-0.009886	0.007772	0.1364	0.08265	0.01701	0.144	-4.94807	7.527e-07	0.01652	0.01124	0.1006	-0.01047	0.01347	0.11	1.53845	0.1238	13	-	-	-
rs60637140	18	13808717	G	A	-0.01833	0.00766	0.0871	0.01347	0.01165	0.08467	-2.28077	0.02255	-0.02468	0.01027	0.07197	0.09659	0.02459	0.07317	-4.55073	5.359e-06	-0.005561	0.0115	0.09309	-0.005974	0.01293	0.1067	0.0238671	0.981	22	systolic blood pressure	Surendran P, Nat Genet, 2016	SNORA48
rs7245961	19	4843612	G	A	0.01467	0.004761	0.6968	-0.01897	0.007568	0.7059	3.76244	0.0001686	0.004789	0.00601	0.6705	-0.01701	0.01424	0.7015	1.41036	0.1586	0.03383	0.007678	0.7072	-0.0189	0.008879	0.7144	4.49212	7.041e-06	3	smoking status measurement, lung carcinoma	McKay JD, Nat Genet, 2017	SLC39A3
rs8111212	19	6166665	T	C	-0.01537	0.004321	0.6022	0.02152	0.006795	0.5995	-4.58118	4.649e-06	-0.01317	0.005289	0.5644	0.02235	0.01268	0.5796	-2.58537	0.009731	-0.01919	0.007557	0.6171	0.02067	0.00801	0.6378	-3.61962	0.0002956	4	-	-	-
rs67256262	19	1778023	A	G	-0.009839	0.005165	0.2204	0.01739	0.008188	0.2334	-2.81264	0.004912	-0.01786	0.006378	0.2008	0.05883	0.0154	0.2369	-4.60089	4.198e-06	0.006344	0.008736	0.2282	0.002938	0.009467	0.2267	0.264403	0.7915	2	-	-	-
rs36010337	19	44530696	C	A	-0.0121	0.007498	0.0871	0.03541	0.01186	0.09382	-3.38598	0.0007094	-0.02111	0.009499	0.1136	0.07622	0.01981	0.09001	-4.4302	9.406e-06	0.001981	0.01214	0.07658	0.01642	0.01455	0.1011	-0.761974	0.4459	1	-	-	-
rs148751085	2	38310007	T	G	0.01159	0.004994	0.2355	-0.006939	0.007898	0.2387	1.98289	0.04732	0.02148	0.006213	0.2159	-0.05514	0.01578	0.2468	4.51794	6.268e-06	-0.006416	0.008315	0.2432	0.007454	0.008918	0.2233	-1.13754	0.2553	10	-	-	-
rs187829394	2	38310986	C	T	0.01339	0.00515	0.2129	-0.0113	0.008397	0.2231	2.50647	0.01219	0.0238	0.006381	0.2008	-0.05472	0.01639	0.2334	4.46432	8.053e-06	-0.005831	0.00865	0.2177	0.003323	0.00958	0.2033	-0.70921	0.4782	11	-	-	-
rs11126201	2	69084017	A	G	-0.01157	0.004331	0.5054	0.008479	0.006529	0.4943	-2.55894	0.0105	-0.01865	0.005316	0.5076	0.0417	0.01164	0.4919	-4.71615	2.389e-06	0.001958	0.007407	0.5045	-0.006655	0.007677	0.4989	0.80739	0.4195	1	-	-	-
rs62163508	2	78134360	C	T	-0.008599	0.005867	0.1591	0.03029	0.009165	0.156	-3.57368	0.0003521	-0.007785	0.007261	0.1667	0.07091	0.016	0.1614	-4.47882	7.541e-06	-0.01015	0.009942	0.1562	0.009676	0.01092	0.1456	-1.34251	0.1794	15	venous thromboembolism	Heit JA, Thromb Haemost, 2017	MYCNUN
rs77461169	2	101816286	C	T	-0.01245	0.008803	0.05806	0.0638	0.0141	0.06445	-4.58719	4.482e-06	-0.01736	0.01127	0.04167	0.07493	0.03238	0.06098	-2.69183	0.007099	-0.008078	0.01402	0.06456	0.05972	0.01554	0.07111	-3.23932	0.001196	21	-	-	-
rs62163509	2	78134368	T	C	-0.008372	0.005877	0.1591	0.03029	0.009165	0.1548	-3.55106	0.0003838	-0.007415	0.007278	0.1667	0.07091	0.016	0.1597	-4.45598	8.392e-06	-0.01015	0.009942	0.1562	0.009676	0.01092	0.1456	-1.34251	0.1794	16	venous thromboembolism	Heit JA, Thromb Haemost, 2017	MYCNUN
rs59236450	2	78139879	A	C	-0.007739	0.005891	0.157	0.0327	0.009174	0.1552	-3.70912	0.0002083	-0.007785	0.007261	0.1629	0.07419	0.01597	0.1614	-4.67276	2.983e-06	-0.007463	0.01007	0.1547	0.01161	0.01093	0.1433	-1.28337	0.1994	14	venous thromboembolism	Heit JA, Thromb Haemost, 2017	MYCNUN
rs6747064	2	78141022	T	C	-0.007739	0.005891	0.157	0.0327	0.009174	0.1552	-3.70912	0.0002083	-0.007785	0.007261	0.1629	0.07419	0.01597	0.1614	-4.67276	2.983e-06	-0.007463	0.01007	0.1547	0.01161	0.01093	0.1433	-1.28337	0.1994	17	venous thromboembolism	Heit JA, Thromb Haemost, 2017	MYCNUN
rs73047627	2	189842214	A	G	0.01807	0.00921	0.06237	-0.05706	0.0135	0.05759	4.59724	4.265e-06	0.02348	0.01112	0.03788	-0.05776	0.03413	0.05981	2.26321	0.02362	0.003137	0.01643	0.07207	-0.05558	0.01459	0.05333	2.67223	0.007524	19	-	-	-
rs11695675	2	200607333	A	G	-0.02224	0.00584	0.1548	0.03296	0.009125	0.1667	-5.09517	3.484e-07	-0.02451	0.007179	0.1553	0.03003	0.01828	0.1765	-2.77711	0.005481	-0.01553	0.01006	0.1547	0.0335	0.01043	0.1478	-3.38348	0.0007187	4	-	-	-
rs12465362	2	230587448	T	G	0.01003	0.005029	0.2258	-0.03273	0.008124	0.2376	4.47534	7.627e-06	0.009409	0.006404	0.2614	-0.02979	0.01509	0.2323	2.39125	0.01678	0.0132	0.008075	0.2117	-0.03209	0.00962	0.2478	3.60593	0.000311	7	-	-	-
rs6750660	2	230587794	T	A	0.01003	0.005029	0.2258	-0.03273	0.008124	0.2376	4.47534	7.627e-06	0.009409	0.006404	0.2614	-0.02979	0.01509	0.2323	2.39125	0.01678	0.0132	0.008075	0.2117	-0.03209	0.00962	0.2478	3.60593	0.000311	18	-	-	-
rs2253860	20	14570465	A	G	0.01214	0.009656	0.943	-0.02851	0.01475	0.9466	2.30579	0.02113	0.02454	0.01221	0.9432	-0.1076	0.02718	0.9483	4.43474	9.183e-06	-0.00767	0.01565	0.9429	0.003177	0.01712	0.9433	-0.46764	0.6401	22	-	-	-
rs6079503	20	14575919	C	T	0.01214	0.009656	0.943	-0.02851	0.01475	0.9466	2.30579	0.02113	0.02454	0.01221	0.9432	-0.1076	0.02718	0.9483	4.43474	9.183e-06	-0.00767	0.01565	0.9429	0.003177	0.01712	0.9433	-0.46764	0.6401	45	-	-	-
rs6513631	20	35303796	T	G	0.008094	0.004779	0.257	-0.02441	0.007769	0.2754	3.56357	0.0003656	0.01034	0.006006	0.25	-0.05925	0.01439	0.2631	4.46288	8.132e-06	0.003344	0.007884	0.2598	-0.01188	0.009045	0.2989	1.2688	0.2044	47	-	-	-
rs7261719	20	35307015	G	A	0.008094	0.004779	0.257	-0.02441	0.007769	0.2754	3.56357	0.0003656	0.01034	0.006006	0.25	-0.05925	0.01439	0.2631	4.46288	8.132e-06	0.003344	0.007884	0.2598	-0.01188	0.009045	0.2989	1.2688	0.2044	48	-	-	-
rs6028725	20	35308104	A	G	0.008094	0.004779	0.257	-0.02441	0.007769	0.2754	3.56357	0.0003656	0.01034	0.006006	0.25	-0.05925	0.01439	0.2631	4.46288	8.132e-06	0.003344	0.007884	0.2598	-0.01188	0.009045	0.2989	1.2688	0.2044	43	-	-	-
rs113096000	20	35308843	G	A	0.008863	0.00474	0.2634	-0.02507	0.007725	0.2807	3.744	0.0001814	0.0117	0.005922	0.2576	-0.06349	0.01426	0.2695	4.86957	1.115e-06	0.002761	0.007897	0.2658	-0.01145	0.008983	0.3022	1.18815	0.2349	7	-	-	-
rs6016198	20	35309601	C	G	0.008094	0.004779	0.257	-0.02441	0.007769	0.2754	3.56357	0.0003656	0.01034	0.006006	0.25	-0.05925	0.01439	0.2631	4.46288	8.132e-06	0.003344	0.007884	0.2598	-0.01188	0.009045	0.2989	1.2688	0.2044	41	-	-	-
rs6101818	20	35319473	C	T	0.008491	0.00478	0.2591	-0.02462	0.007724	0.2765	3.64521	0.0002671	0.01088	0.006006	0.25	-0.05925	0.01439	0.2636	4.49751	6.906e-06	0.003922	0.007892	0.2628	-0.01227	0.008976	0.3011	1.35474	0.1754	46	-	-	-
rs112804534	20	35320975	G	A	0.008237	0.00478	0.2591	-0.02462	0.007724	0.2761	3.61725	0.0002977	0.01088	0.006006	0.25	-0.05925	0.01439	0.2636	4.49751	6.906e-06	0.00325	0.007888	0.2628	-0.01227	0.008976	0.3	1.29881	0.1939	5	-	-	-
rs111711947	20	35322244	A	G	0.008237	0.00478	0.2591	-0.02462	0.007724	0.2761	3.61725	0.0002977	0.01088	0.006006	0.25	-0.05925	0.01439	0.2636	4.49751	6.906e-06	0.00325	0.007888	0.2628	-0.01227	0.008976	0.3	1.29881	0.1939	2	-	-	-
rs60705727	20	35323378	G	A	0.007255	0.004981	0.2258	-0.02648	0.008173	0.2365	3.52463	0.0004237	0.009442	0.006283	0.2386	-0.06002	0.01438	0.2288	4.42639	9.597e-06	0.003466	0.008144	0.2207	-0.0124	0.00972	0.2511	1.25118	0.2108	44	-	-	-
rs1275255	20	35335891	G	A	0.007255	0.004981	0.2258	-0.02648	0.008173	0.2365	3.52463	0.0004237	0.009442	0.006283	0.2386	-0.06002	0.01438	0.2288	4.42639	9.597e-06	0.003466	0.008144	0.2207	-0.0124	0.00972	0.2511	1.25118	0.2108	12	-	-	-
rs112890847	20	35341056	T	C	0.008237	0.00478	0.2591	-0.02462	0.007724	0.2761	3.61725	0.0002977	0.01088	0.006006	0.25	-0.05925	0.01439	0.2636	4.49751	6.906e-06	0.00325	0.007888	0.2628	-0.01227	0.008976	0.3	1.29881	0.1939	6	-	-	-
rs1631651	20	35341762	T	C	0.008237	0.00478	0.2591	-0.02462	0.007724	0.2761	3.61725	0.0002977	0.01088	0.006006	0.25	-0.05925	0.01439	0.2636	4.49751	6.906e-06	0.00325	0.007888	0.2628	-0.01227	0.008976	0.3	1.29881	0.1939	16	-	-	-
rs1275257	20	35361489	G	A	0.008841	0.004786	0.2581	-0.02449	0.007724	0.2746	3.66816	0.0002445	0.01135	0.006003	0.2462	-0.05881	0.01441	0.2619	4.49444	6.962e-06	0.004052	0.007926	0.2628	-0.01227	0.008976	0.2989	1.36306	0.1728	13	-	-	-
rs1275259	20	35362636	T	C	0.008767	0.004787	0.2581	-0.02449	0.007724	0.275	3.6598	0.0002525	0.01124	0.006004	0.2462	-0.05881	0.01441	0.2625	4.48729	7.207e-06	0.004052	0.007926	0.2628	-0.01227	0.008976	0.2989	1.36306	0.1728	14	-	-	-
rs2425268	20	35372702	G	T	0.008767	0.004787	0.257	-0.02459	0.007723	0.275	3.67115	0.0002416	0.01124	0.006004	0.2462	-0.05881	0.01441	0.2625	4.48729	7.207e-06	0.004052	0.007926	0.2613	-0.01246	0.008974	0.2989	1.3791	0.1679	23	-	-	-
rs1782475	20	35373223	C	T	0.008767	0.004787	0.257	-0.02459	0.007723	0.275	3.67115	0.0002416	0.01124	0.006004	0.2462	-0.05881	0.01441	0.2625	4.48729	7.207e-06	0.004052	0.007926	0.2613	-0.01246	0.008974	0.2989	1.3791	0.1679	21	-	-	-
rs78454987	20	35384734	A	G	0.01035	0.005038	0.2215	-0.02144	0.008217	0.2273	3.29823	0.0009738	0.01383	0.006409	0.1932	-0.06344	0.01625	0.2143	4.42347	9.73e-06	0.004443	0.008143	0.2327	-0.008804	0.009366	0.2522	1.06737	0.2858	52	-	-	-
rs2425275	20	35385487	C	T	0.008638	0.004784	0.2527	-0.02487	0.007719	0.2727	3.68979	0.0002249	0.0115	0.006002	0.2462	-0.05881	0.01441	0.2607	4.50416	6.662e-06	0.003209	0.007914	0.2553	-0.01296	0.008967	0.2956	1.35194	0.1763	24	-	-	-
rs2425276	20	35387536	C	T	0.009139	0.004784	0.2559	-0.02452	0.007723	0.2735	3.70503	0.0002116	0.0115	0.006002	0.2462	-0.05881	0.01441	0.2607	4.50416	6.662e-06	0.004586	0.007921	0.2598	-0.01246	0.008972	0.2978	1.42427	0.1544	25	-	-	-
rs2425277	20	35388369	G	A	0.008881	0.004776	0.2581	-0.02441	0.007681	0.2735	3.68069	0.0002321	0.01109	0.005985	0.2462	-0.05881	0.01441	0.2607	4.47977	7.467e-06	0.004586	0.007921	0.2628	-0.01247	0.008906	0.2978	1.43101	0.1523	26	-	-	-
rs2425278	20	35389587	C	T	0.01078	0.00504	0.2204	-0.02138	0.00822	0.2258	3.33537	0.000853	0.01415	0.006413	0.1932	-0.06344	0.01625	0.2125	4.44141	8.95e-06	0.005012	0.008142	0.2312	-0.008816	0.009369	0.2511	1.11404	0.2653	27	-	-	-
rs2425281	20	35395618	G	T	0.00898	0.00479	0.2505	-0.02566	0.007759	0.27	3.79889	0.0001451	0.01096	0.006003	0.2462	-0.05881	0.01441	0.2602	4.46946	7.839e-06	0.005159	0.007933	0.2523	-0.01388	0.009032	0.2889	1.58378	0.1132	28	-	-	-
rs2425282	20	35397901	C	T	0.008767	0.004787	0.257	-0.02459	0.007723	0.275	3.67115	0.0002416	0.01124	0.006004	0.2462	-0.05881	0.01441	0.2625	4.48729	7.207e-06	0.004052	0.007926	0.2613	-0.01246	0.008974	0.2989	1.3791	0.1679	29	-	-	-
rs2425284	20	35400776	C	T	0.008767	0.004787	0.257	-0.02459	0.007723	0.275	3.67115	0.0002416	0.01124	0.006004	0.2462	-0.05881	0.01441	0.2625	4.48729	7.207e-06	0.004052	0.007926	0.2613	-0.01246	0.008974	0.2989	1.3791	0.1679	30	-	-	-
rs2425285	20	35401299	G	C	0.01038	0.004831	0.2516	-0.02506	0.007809	0.2654	3.8595	0.0001138	0.01272	0.006087	0.2424	-0.05925	0.0144	0.2515	4.60353	4.136e-06	0.006053	0.007942	0.2553	-0.0124	0.009112	0.2922	1.52664	0.1269	31	-	-	-
rs2425292	20	35417854	C	T	0.008941	0.004786	0.2581	-0.0238	0.007729	0.275	3.60154	0.0003167	0.01124	0.006004	0.2462	-0.05881	0.01441	0.2625	4.48729	7.207e-06	0.004533	0.007925	0.2628	-0.01137	0.00898	0.2989	1.32781	0.1842	32	-	-	-
rs2425293	20	35417896	C	T	0.008941	0.004786	0.2581	-0.0238	0.007729	0.275	3.60154	0.0003167	0.01124	0.006004	0.2462	-0.05881	0.01441	0.2625	4.48729	7.207e-06	0.004533	0.007925	0.2628	-0.01137	0.00898	0.2989	1.32781	0.1842	33	-	-	-
rs8118134	20	35418762	C	T	0.008941	0.004786	0.2581	-0.0238	0.007729	0.275	3.60154	0.0003167	0.01124	0.006004	0.2462	-0.05881	0.01441	0.2625	4.48729	7.207e-06	0.004533	0.007925	0.2628	-0.01137	0.00898	0.2989	1.32781	0.1842	53	-	-	-
20:35431831	20	35431831	G	A	0.009347	0.004788	0.2602	-0.02361	0.007732	0.2765	3.62386	0.0002899	0.01196	0.006004	0.25	-0.05734	0.01445	0.2642	4.42877	9.511e-06	0.004437	0.00793	0.2643	-0.01163	0.00898	0.3	1.34113	0.18	1	-	-	-
rs2425303	20	35433414	G	A	0.008334	0.00499	0.228	-0.02715	0.008164	0.2361	3.70852	0.0002084	0.0108	0.006283	0.2348	-0.05963	0.0144	0.2276	4.48284	7.365e-06	0.004218	0.00819	0.2252	-0.01333	0.009702	0.2522	1.3821	0.1669	34	-	-	-
rs2425304	20	35433702	C	T	0.009347	0.004788	0.2624	-0.02435	0.007729	0.2765	3.70627	0.0002107	0.01196	0.006004	0.25	-0.05734	0.01445	0.2642	4.42877	9.511e-06	0.004437	0.00793	0.2673	-0.01258	0.008981	0.3	1.42034	0.1556	35	-	-	-
rs389332	21	18270964	G	C	-0.01776	0.008468	0.9387	0.05623	0.01442	0.9344	-4.42457	9.645e-06	-0.02146	0.01026	0.9356	0.05153	0.02688	0.9315	-2.53688	0.01119	-0.00858	0.01499	0.9399	0.05789	0.01694	0.94	-2.93855	0.00329	4	-	-	-
rs6025645	20	56157341	A	G	0.005817	0.004378	0.4473	-0.008828	0.006678	0.4443	1.83403	0.06666	0.008647	0.00539	0.3939	-0.05449	0.01199	0.4402	4.80282	1.564e-06	0.0008437	0.007481	0.4685	0.008071	0.007791	0.4522	-0.669123	0.5034	42	-	-	-
rs6015037	20	56157549	A	G	-0.002537	0.004301	0.5613	0.001219	0.006773	0.5984	-0.468141	0.6397	-0.003731	0.005335	0.5379	0.05693	0.01244	0.5877	-4.48155	7.424e-06	-0.001445	0.007261	0.5706	-0.01735	0.007729	0.6189	1.49981	0.1337	40	-	-	-
rs57246606	21	20455408	C	T	-0.004012	0.004645	0.2731	0.006413	0.007867	0.2929	-1.1411	0.2538	-0.008108	0.005839	0.2841	0.06016	0.01321	0.2933	-4.72674	2.281e-06	0.003689	0.00762	0.2688	-0.01928	0.009322	0.2922	1.90771	0.05644	5	-	-	-
rs9976292	21	20455886	T	C	-0.004012	0.004645	0.2731	0.006413	0.007867	0.2929	-1.1411	0.2538	-0.008108	0.005839	0.2841	0.06016	0.01321	0.2933	-4.72674	2.281e-06	0.003689	0.00762	0.2688	-0.01928	0.009322	0.2922	1.90771	0.05644	11	-	-	-
rs9982779	21	20459913	T	G	-0.004381	0.004636	0.271	0.006696	0.007862	0.2929	-1.21364	0.2249	-0.008108	0.005839	0.2841	0.06016	0.01321	0.2933	-4.72674	2.281e-06	0.002596	0.007583	0.2658	-0.01902	0.009318	0.2922	1.79929	0.07196	12	-	-	-
rs76436022	21	20464033	C	G	-0.004202	0.004641	0.271	0.006696	0.007862	0.2906	-1.1937	0.2326	-0.007874	0.005836	0.2841	0.06016	0.01321	0.2921	-4.71094	2.466e-06	0.002726	0.007609	0.2658	-0.01902	0.009318	0.2878	1.80764	0.07064	7	-	-	-
rs116592867	21	20465974	G	C	-0.003767	0.004633	0.271	0.006696	0.007862	0.291	-1.14656	0.2516	-0.007582	0.005821	0.2841	0.06016	0.01321	0.2921	-4.69269	2.695e-06	0.003253	0.007611	0.2658	-0.01902	0.009318	0.2889	1.85125	0.06412	3	-	-	-
rs9974870	21	20467128	C	T	-0.003367	0.004633	0.2753	0.006772	0.007781	0.2952	-1.11961	0.2629	-0.007532	0.00581	0.2917	0.05788	0.01279	0.2944	-4.65639	3.24e-06	0.004649	0.007632	0.2688	-0.0195	0.00932	0.2967	2.00471	0.04498	10	-	-	-
rs9680265	21	22433521	T	C	0.001323	0.005138	0.2086	0.02292	0.008199	0.2246	-2.23205	0.02562	-0.006759	0.006569	0.2083	0.06204	0.01412	0.2033	-4.41777	9.939e-06	0.01461	0.008271	0.2087	0.004759	0.009791	0.2656	0.768594	0.4422	8	-	-	-
rs9974620	21	36097794	C	T	-0.005517	0.00469	0.7129	0.03665	0.00717	0.6873	-4.92164	8.563e-07	-0.01137	0.005845	0.7045	0.03672	0.01317	0.6777	-3.33755	0.0008418	0.004458	0.007825	0.7162	0.03538	0.008493	0.7056	-2.67764	0.00741	9	coronary artery calcification, type II diabetes mellitus; atrial fibrillation	Divers J, BMC Genet, 2017; Roselli C, Nat Genet, 2018	PPP6R2P1; RNU6-1326P; AL034449.1
rs13058149	22	27831347	T	C	0.004649	0.00432	0.5043	-0.01175	0.006612	0.4687	2.07631	0.03787	0.006121	0.005351	0.5152	-0.05334	0.01205	0.4733	4.50986	6.485e-06	0.002868	0.007301	0.5	0.004449	0.00766	0.46	-0.149404	0.8813	2	-	-	-
rs73425956	22	48984237	A	G	-0.009243	0.007396	0.09247	0.02848	0.01231	0.09764	-2.62678	0.008593	-0.007055	0.009191	0.1023	0.09858	0.02092	0.0993	-4.62298	3.785e-06	-0.01095	0.01242	0.08859	-0.004756	0.01467	0.09444	-0.322244	0.7471	3	-	-	-
rs7619102	3	12728045	A	G	0.01704	0.006133	0.1495	-0.03393	0.0096	0.135	4.47426	7.65e-06	0.02045	0.007282	0.1288	-0.04611	0.01897	0.1504	3.27565	0.001056	0.007338	0.01153	0.1577	-0.02936	0.01105	0.1056	2.29792	0.02158	33	-	-	-
rs869784	3	24348008	C	T	0.009658	0.004592	0.7151	-0.02898	0.00724	0.6979	4.5067	6.569e-06	0.01145	0.005651	0.7689	-0.03258	0.01444	0.6835	2.83948	0.004518	0.006044	0.007897	0.6937	-0.02647	0.008365	0.7256	2.82639	0.004709	38	-	-	-
rs9834968	3	69552204	G	A	0.01895	0.00771	0.08602	-0.0438	0.01169	0.082	4.481	7.453e-06	0.02328	0.01015	0.08712	-0.04479	0.02152	0.07375	2.86086	0.004233	0.01439	0.01181	0.08559	-0.03815	0.01385	0.09778	2.88656	0.003897	39	-	-	-
rs17041758	3	4975451	T	C	0.007657	0.005072	0.2484	-0.005358	0.008033	0.2426	1.36997	0.1707	0.01623	0.006212	0.2727	-0.05052	0.01375	0.2451	4.42401	9.69e-06	-0.01135	0.008704	0.2387	0.01574	0.009576	0.2378	-2.09341	0.03633	20	smoking behavior, 3-hydroxypropylmercapturic acid measurement	Park SL, PLoS One, 2015	THUMPD3
rs4684453	3	4975879	T	A	0.00708	0.005029	0.2602	-0.004784	0.007897	0.2479	1.2672	0.2051	0.01528	0.006195	0.2765	-0.05161	0.01373	0.2485	4.44071	9.009e-06	-0.01079	0.008532	0.2538	0.0157	0.009324	0.2467	-2.09597	0.03605	22	smoking behavior, 3-hydroxypropylmercapturic acid measurement	Park SL, PLoS One, 2015	THUMPD3
rs7578	3	127408239	A	G	0.008558	0.004328	0.4742	-0.02737	0.006556	0.4729	4.57347	4.785e-06	0.008643	0.005402	0.4962	-0.02957	0.01236	0.475	2.83292	0.004619	0.00864	0.007206	0.4655	-0.02575	0.00768	0.4689	3.2655	0.001092	31	smoking status measurement, diastolic blood pressure	Sung YJ, Am J Hum Genet, 2018	RPL36P20
rs782444	3	127409941	C	T	0.00876	0.004332	0.4731	-0.02741	0.006571	0.4725	4.59566	4.318e-06	0.008966	0.005409	0.4962	-0.02957	0.01236	0.4744	2.85627	0.004292	0.00864	0.007206	0.464	-0.02591	0.007705	0.4689	3.27501	0.001055	36	smoking status measurement, diastolic blood pressure	Sung YJ, Am J Hum Genet, 2018	RPL36P20
rs6809960	3	166453919	T	C	0.009104	0.00482	0.2796	-0.01763	0.007233	0.2723	3.07575	0.002099	0.01597	0.006064	0.2462	-0.05028	0.01318	0.277	4.56642	4.946e-06	-0.002025	0.007885	0.2928	-0.004688	0.008493	0.2633	0.229787	0.8183	27	-	-	-
rs10428234	3	166455482	A	G	0.009109	0.004794	0.2796	-0.01763	0.007233	0.2738	3.08142	0.002059	0.01553	0.006048	0.2462	-0.05028	0.01318	0.2776	4.53818	5.658e-06	-0.0009214	0.007806	0.2928	-0.004688	0.008493	0.2667	0.326526	0.744	1	-	-	-
rs60568274	3	166457198	C	T	0.00652	0.00542	0.2118	-0.02111	0.008043	0.1945	2.84881	0.004388	0.01601	0.006791	0.197	-0.05458	0.01445	0.1986	4.42121	9.767e-06	-0.009382	0.008916	0.2177	-0.00675	0.009492	0.1867	-0.202107	0.8398	25	-	-	-
rs7649061	3	166457671	A	C	0.0104	0.004941	0.2634	-0.01966	0.007347	0.2513	3.39511	0.0006845	0.01907	0.006203	0.2311	-0.0582	0.01295	0.2549	5.38131	7.37e-08	-0.003706	0.008098	0.2763	-0.003788	0.008691	0.2444	0.00690293	0.9945	34	-	-	-
rs10513629	3	166459187	A	G	0.007719	0.004797	0.2817	-0.01885	0.007195	0.275	3.07245	0.002123	0.01432	0.006105	0.2462	-0.05028	0.01318	0.2764	4.44742	8.666e-06	-0.0008668	0.007693	0.2958	-0.006255	0.008442	0.2722	0.471761	0.6371	2	-	-	-
rs73031530	3	166464496	A	C	0.009483	0.004837	0.2763	-0.01674	0.007268	0.2712	3.00363	0.00267	0.01743	0.006165	0.2424	-0.05068	0.01317	0.2718	4.68383	2.811e-06	-0.001269	0.007729	0.2898	-0.003173	0.008544	0.27	0.165261	0.8688	28	-	-	-
rs59289839	3	166474820	T	G	0.009856	0.005768	0.1892	-0.0211	0.008365	0.169	3.04659	0.002313	0.01766	0.007193	0.178	-0.0562	0.01498	0.1702	4.44473	8.779e-06	-0.002643	0.009585	0.1937	-0.006152	0.009878	0.1667	0.254941	0.7987	24	-	-	-
rs56352015	3	166509151	C	T	0.01081	0.005849	0.1914	-0.0224	0.008344	0.1621	3.25912	0.001119	0.01889	0.007339	0.1629	-0.05778	0.01558	0.1609	4.45186	8.549e-06	-0.001634	0.009611	0.2027	-0.008878	0.009725	0.1644	0.529809	0.5962	23	-	-	-
rs73880644	3	166509632	C	T	0.01247	0.005868	0.1903	-0.02318	0.008346	0.1594	3.49427	0.0004753	0.02095	0.007368	0.1591	-0.06085	0.01557	0.1574	4.74882	2.042e-06	-0.0004853	0.009625	0.2027	-0.008878	0.009725	0.1633	0.61338	0.5396	30	-	-	-
rs7615817	3	166528151	G	A	0.007643	0.00458	0.3871	-0.02343	0.00688	0.3627	3.75957	0.0001704	0.01187	0.005774	0.322	-0.0543	0.01197	0.3647	4.97899	6.445e-07	0.001151	0.007476	0.4129	-0.01035	0.008277	0.3589	1.03116	0.3024	32	-	-	-
rs11712507	3	166533882	T	A	0.003256	0.004545	0.3634	-0.02162	0.007109	0.3444	2.94819	0.0032	0.007207	0.005743	0.3295	-0.05914	0.0128	0.3496	4.72916	2.272e-06	-0.00285	0.007395	0.3769	-0.00611	0.008347	0.3344	0.292334	0.77	5	-	-	-
rs11712538	3	166533979	T	A	0.003256	0.004545	0.3634	-0.02162	0.007109	0.3444	2.94819	0.0032	0.007207	0.005743	0.3295	-0.05914	0.0128	0.3496	4.72916	2.272e-06	-0.00285	0.007395	0.3769	-0.00611	0.008347	0.3344	0.292334	0.77	6	-	-	-
rs6803902	3	166535042	A	G	0.003123	0.004551	0.3634	-0.02162	0.007109	0.344	2.93131	0.003381	0.007207	0.005743	0.3295	-0.05914	0.0128	0.3496	4.72916	2.272e-06	-0.003314	0.007423	0.3769	-0.00611	0.008347	0.3333	0.250309	0.8023	26	-	-	-
rs9862699	3	166536048	A	G	0.003352	0.004542	0.3624	-0.02256	0.007095	0.3436	3.07586	0.002096	0.007334	0.005739	0.3295	-0.05914	0.0128	0.349	4.73877	2.168e-06	-0.002786	0.007389	0.3754	-0.007512	0.00833	0.3333	0.424431	0.6712	41	-	-	-
rs9862464	3	166536075	A	C	0.003352	0.004542	0.3624	-0.02256	0.007095	0.3436	3.07586	0.002096	0.007334	0.005739	0.3295	-0.05914	0.0128	0.349	4.73877	2.168e-06	-0.002786	0.007389	0.3754	-0.007512	0.00833	0.3333	0.424431	0.6712	40	-	-	-
rs2643063	3	191493008	C	T	-0.001428	0.007311	0.1043	0.01404	0.01124	0.09725	-1.1536	0.2485	-0.01143	0.008924	0.125	0.08585	0.0197	0.09988	-4.49808	6.838e-06	0.02023	0.01267	0.0961	-0.01539	0.01321	0.09222	1.94603	0.05165	21	-	-	-
rs779272	3	191506748	T	A	-0.01171	0.007622	0.09032	0.008081	0.01152	0.08734	-1.43276	0.1519	-0.02495	0.009554	0.125	0.07407	0.01921	0.08479	-4.61531	3.943e-06	0.01319	0.01252	0.07658	-0.02352	0.01396	0.09222	1.95767	0.05025	35	-	-	-
rs76169119	4	40556609	G	C	0.02216	0.009219	0.06344	-0.05464	0.01367	0.05835	4.65789	3.202e-06	0.02403	0.01122	0.06439	-0.03179	0.02543	0.06156	2.00826	0.04464	0.02272	0.01617	0.06306	-0.06346	0.01606	0.05222	3.78145	0.0001559	20	-	-	-
rs79243722	4	93634354	G	A	-0.0002183	0.008365	0.06559	0.05163	0.01351	0.07018	-3.26294	0.001105	-0.004771	0.0103	0.06818	0.109	0.02315	0.07143	-4.49014	7.078e-06	0.007287	0.01428	0.06456	0.02375	0.01623	0.06778	-0.761547	0.4463	22	-	-	-
rs146860029	4	93634921	C	T	-0.0002183	0.008365	0.06559	0.05163	0.01351	0.07018	-3.26294	0.001105	-0.004771	0.0103	0.06818	0.109	0.02315	0.07143	-4.49014	7.078e-06	0.007287	0.01428	0.06456	0.02375	0.01623	0.06778	-0.761547	0.4463	8	-	-	-
rs59483727	4	108724898	C	T	0.01178	0.006844	0.1065	-0.03002	0.01136	0.1125	3.15178	0.001626	0.005285	0.008303	0.09848	0.03053	0.0228	0.1208	-1.0404	0.2983	0.02573	0.01211	0.1096	-0.05244	0.01277	0.09667	4.44173	8.924e-06	15	-	-	-
rs113759206	4	116574034	T	A	0.01494	0.005947	0.1419	-0.02013	0.009812	0.1556	3.0566	0.002242	0.01143	0.007418	0.1364	-0.07993	0.01848	0.1551	4.5879	4.458e-06	0.02127	0.009904	0.1441	0.001061	0.01127	0.1567	1.34696	0.178	3	-	-	-
rs6819524	4	116593891	G	T	0.01431	0.005938	0.1452	-0.02139	0.009749	0.1568	3.12746	0.001765	0.01064	0.007406	0.1402	-0.08091	0.01828	0.1562	4.64173	3.442e-06	0.02104	0.00989	0.1471	-0.0003905	0.01121	0.1578	1.43356	0.1518	17	-	-	-
rs72899683	4	116597986	G	A	0.01395	0.005942	0.1452	-0.02139	0.009749	0.1564	3.09535	0.001965	0.01031	0.007407	0.1402	-0.08091	0.01828	0.1562	4.62491	3.737e-06	0.02058	0.009908	0.1471	-0.0003905	0.01121	0.1567	1.40167	0.161	19	-	-	-
rs112636998	4	116600034	T	G	0.01386	0.005963	0.1452	-0.02139	0.009749	0.156	3.08452	0.002044	0.01012	0.007447	0.1402	-0.08091	0.01828	0.1556	4.61175	3.979e-06	0.02058	0.009908	0.1471	-0.0003905	0.01121	0.1567	1.40167	0.161	2	-	-	-
rs2061842	4	116605864	A	G	0.01405	0.005966	0.1462	-0.02168	0.009643	0.1556	3.15098	0.001627	0.01008	0.007514	0.1402	-0.08091	0.01828	0.1527	4.60381	4.14e-06	0.02098	0.009761	0.1486	-0.001532	0.01105	0.1611	1.52688	0.1269	14	-	-	-
rs6844072	4	116606013	C	T	0.01385	0.005998	0.1452	-0.02139	0.009749	0.1541	3.07871	0.002079	0.01008	0.007514	0.1402	-0.08091	0.01828	0.1527	4.60381	4.14e-06	0.02058	0.009908	0.1471	-0.0003905	0.01121	0.1567	1.40167	0.161	18	-	-	-
rs56289397	5	38910178	T	C	0.01446	0.006457	0.1226	-0.0293	0.01048	0.1205	3.55498	0.0003794	0.00654	0.008273	0.1061	0.01061	0.02232	0.1156	-0.17098	0.8643	0.02666	0.01025	0.1291	-0.0423	0.01167	0.13	4.43979	9.022e-06	25	-	-	-
rs62352637	5	38912972	C	T	0.01446	0.006457	0.1226	-0.0293	0.01048	0.1205	3.55498	0.0003794	0.00654	0.008273	0.1061	0.01061	0.02232	0.1156	-0.17098	0.8643	0.02666	0.01025	0.1291	-0.0423	0.01167	0.13	4.43979	9.022e-06	27	-	-	-
rs73764616	5	76294836	T	C	0.001237	0.00793	0.07634	-0.04022	0.0128	0.07742	2.75327	0.005898	0.01649	0.01061	0.06818	-0.1082	0.02486	0.06911	4.61311	3.963e-06	-0.02393	0.01181	0.07958	-0.02198	0.01462	0.09333	-0.103756	0.9175	31	-	-	-
rs2407218	5	121909381	G	A	0.01348	0.008773	0.05484	0.04887	0.01488	0.06293	-2.04878	0.04047	-0.0006697	0.01126	0.04545	0.1537	0.02876	0.05981	-4.9981	5.782e-07	0.03632	0.01385	0.05856	0.01771	0.01691	0.06889	0.851406	0.3946	24	heart rate response to exercise; heart rate response to recovery post exercise	Verweij N, Nat Commun, 2018; Ramirez J, Nat Commun, 2018	RP11-374A4.1; RP11-823P9.3; CTD-2138O14.1; Y_RNA; CTD-2015B23.2; CTD-2074D8.1; CDH10; RP11-116O11.1
rs78132156	5	140120573	C	G	-0.003811	0.008087	0.08602	0.02833	0.01229	0.07666	-2.18468	0.02892	-0.007498	0.009637	0.1023	0.1014	0.02082	0.08362	-4.74663	2.077e-06	0.005406	0.01495	0.07958	-0.003217	0.01467	0.06333	0.411689	0.6806	34	-	-	-
rs78348175	5	140121450	T	G	-0.003811	0.008087	0.08602	0.02833	0.01229	0.07666	-2.18468	0.02892	-0.007498	0.009637	0.1023	0.1014	0.02082	0.08362	-4.74663	2.077e-06	0.005406	0.01495	0.07958	-0.003217	0.01467	0.06333	0.411689	0.6806	35	-	-	-
rs143822143	5	140127106	T	C	-0.003321	0.008102	0.08602	0.02833	0.01229	0.07628	-2.15016	0.03156	-0.006844	0.009662	0.1023	0.1014	0.02082	0.08304	-4.71596	2.416e-06	0.005406	0.01495	0.07958	-0.003217	0.01467	0.06333	0.411689	0.6806	17	-	-	-
rs115051266	5	140133031	G	C	-0.002585	0.008118	0.08602	0.02833	0.01229	0.0759	-2.09891	0.03584	-0.005835	0.009687	0.1023	0.1014	0.02082	0.08246	-4.66986	3.028e-06	0.005406	0.01495	0.07958	-0.003217	0.01467	0.06333	0.411689	0.6806	9	-	-	-
5:140150415	5	140150415	G	A	-0.00409	0.007494	0.1011	0.02767	0.01144	0.0942	-2.32231	0.02021	-0.007507	0.00916	0.1023	0.1014	0.02082	0.0964	-4.78797	1.692e-06	0.003693	0.01301	0.1006	0.001519	0.01325	0.09	0.117074	0.9068	1	-	-	-
5:140208927	5	140208927	A	C	-0.004582	0.007705	0.09462	0.03255	0.01168	0.08963	-2.65371	0.007984	-0.008208	0.0095	0.09848	0.1081	0.02091	0.09059	-5.06416	4.072e-07	0.003642	0.01313	0.09309	0.00532	0.0136	0.08778	-0.0887648	0.9293	2	-	-	-
5:140223827	5	140223827	A	G	-0.004275	0.00773	0.09247	0.03134	0.01179	0.08886	-2.52622	0.01152	-0.008999	0.009521	0.09091	0.1084	0.02168	0.09001	-4.95804	7.158e-07	0.006319	0.01319	0.09309	0.00532	0.0136	0.08667	0.0527299	0.958	3	-	-	-
rs2009974	5	148836328	A	G	0.02342	0.006414	0.1366	-0.02901	0.009959	0.1281	4.42607	9.602e-06	0.02013	0.007894	0.1364	-0.03364	0.01887	0.1295	2.62874	0.008562	0.03051	0.01097	0.1366	-0.02883	0.01161	0.1256	3.71505	0.0002027	22	-	-	-
rs10454990	5	148838117	T	C	0.02477	0.006399	0.1376	-0.0291	0.009937	0.1289	4.55788	5.166e-06	0.02213	0.007869	0.1364	-0.03364	0.01887	0.1307	2.72781	0.006371	0.03051	0.01097	0.1381	-0.02868	0.01158	0.1256	3.71072	0.0002057	5	-	-	-
rs180973	5	165988671	A	G	0.0187	0.00794	0.929	-0.03436	0.01279	0.9211	3.52461	0.0004239	0.02972	0.01031	0.9318	-0.08633	0.02387	0.9262	4.46322	8.079e-06	0.001717	0.01236	0.9279	-0.01537	0.01488	0.9111	0.88333	0.3771	20	-	-	-
rs239468	5	165988785	A	G	0.0187	0.00794	0.929	-0.03436	0.01279	0.9211	3.52461	0.0004239	0.02972	0.01031	0.9318	-0.08633	0.02387	0.9262	4.46322	8.079e-06	0.001717	0.01236	0.9279	-0.01537	0.01488	0.9111	0.88333	0.3771	23	-	-	-
rs1349362	5	165990209	C	T	0.0171	0.007873	0.929	-0.03436	0.01279	0.9203	3.42634	0.0006119	0.02856	0.01019	0.9318	-0.08633	0.02387	0.9257	4.42667	9.592e-06	-0.0008537	0.01231	0.9279	-0.01537	0.01488	0.91	0.751675	0.4522	13	-	-	-
5:171912171	5	171912171	T	C	0.002746	0.004465	0.5849	-0.01422	0.006867	0.6014	2.07131	0.03836	0.002508	0.005518	0.5492	-0.05736	0.01214	0.5859	4.48947	7.154e-06	0.002575	0.007625	0.5991	0.002187	0.008059	0.6311	0.0349723	0.9721	4	-	-	-
rs6934349	6	6899063	C	G	0.01031	0.004665	0.2796	-0.008064	0.007535	0.3089	2.0733	0.0381	0.01603	0.005869	0.3295	-0.04734	0.0127	0.3049	4.52949	5.886e-06	-0.0007698	0.007637	0.2598	0.01134	0.00912	0.3167	-1.01803	0.3088	18	smoking behavior, 3-hydroxy-1-methylpropylmercapturic acid measurement	Park SL, PLoS One, 2015	CAGE1
rs699402	6	122588540	C	T	-0.0128	0.008157	0.06667	0.05057	0.01368	0.06941	-3.9787	6.915e-05	-0.01496	0.00992	0.07197	0.1114	0.02411	0.07375	-4.84676	1.242e-06	-0.007514	0.01434	0.06456	0.02624	0.01622	0.06111	-1.55907	0.119	19	-	-	-
rs76515539	6	128905742	G	A	0.01317	0.007029	0.07097	-0.02365	0.01349	0.0984	2.42055	0.01546	0.009925	0.00827	0.1098	-0.09081	0.01958	0.1092	4.73939	2.147e-06	0.01968	0.01351	0.05556	0.03091	0.01775	0.07778	-0.503439	0.6146	21	-	-	-
rs76865199	6	128910715	C	T	0.01306	0.00702	0.07097	-0.02365	0.01349	0.09878	2.41398	0.01576	0.009788	0.008257	0.1098	-0.09081	0.01958	0.1098	4.73407	2.205e-06	0.01968	0.01351	0.05556	0.03091	0.01775	0.07778	-0.503439	0.6146	22	-	-	-
rs59322395	6	128914510	G	A	0.0134	0.006718	0.0828	-0.01255	0.01253	0.1095	1.82524	0.06792	0.01155	0.008033	0.1174	-0.08719	0.01922	0.1161	4.74001	2.14e-06	0.01671	0.0123	0.06907	0.03657	0.01572	0.09667	-0.994981	0.3197	15	-	-	-
rs6908852	6	130781638	C	T	0.001385	0.004373	0.5301	-0.02575	0.006634	0.5046	3.41508	0.0006387	-0.005516	0.005486	0.5114	-0.001154	0.01344	0.4925	-0.300485	0.7638	0.01405	0.007197	0.5375	-0.0336	0.007503	0.5278	4.58318	4.588e-06	17	-	-	-
rs4296898	6	153994951	T	C	0.001646	0.0073	0.9161	0.03065	0.01173	0.9085	-2.0993	0.0358	0.01679	0.008669	0.8977	-0.009075	0.02	0.9013	1.18658	0.2353	-0.03929	0.01342	0.9234	0.05254	0.01429	0.9222	-4.68435	2.802e-06	13	coronary artery calcification	Wojczynski MK, BMC Med Genet, 2013	RP11-420L9.2
rs4869800	6	154002533	G	A	0.002468	0.007259	0.9151	0.0316	0.01167	0.9069	-2.1197	0.03407	0.01763	0.008603	0.8977	-0.009075	0.02	0.899	1.22659	0.2199	-0.03929	0.01342	0.9219	0.05364	0.01417	0.9222	-4.76166	1.923e-06	14	coronary artery calcification	Wojczynski MK, BMC Med Genet, 2013	RP11-420L9.2
rs2350395	6	154005364	C	A	0.003063	0.007189	0.914	0.03005	0.01163	0.9054	-1.97381	0.0484	0.01869	0.008554	0.8977	-0.009075	0.02	0.8972	1.27641	0.2017	-0.03996	0.01313	0.9204	0.05085	0.0141	0.9211	-4.71331	2.442e-06	11	coronary artery calcification	Wojczynski MK, BMC Med Genet, 2013	RP11-420L9.2
rs7450411	6	161010354	A	C	-0.01146	0.007376	0.1086	0.01273	0.01039	0.09954	-1.89845	0.05764	-0.0108	0.0092	0.125	0.07519	0.0171	0.09698	-4.42842	9.515e-06	-0.01724	0.01229	0.1021	-0.02042	0.01252	0.1044	0.181258	0.8562	20	aortic valve calcification; coronary heart disease; stroke, coronary heart disease; large artery stroke, coronary heart disease; myocardial infarction; coronary artery disease; percutaneous transluminal coronary angioplasty, coronary artery bypass, angina pectoris, ischemic cardiomyopathy, myocardial infarction, coronary artery disease; aortic stenosis; large artery stroke	Thanassoulis G, N Engl J Med, 2013; Schunkert H, Nat Genet, 2011; Dichgans M, Stroke, 2013; Nikpay M, Nat Genet, 2015; van der Harst P, Circ Res, 2017; Nelson CP, Nat Genet, 2017; Helgadottir A, Nat Commun, 2018; Malik R, Nat Genet, 2018	RP4-668J24.2; NQO2; RNA5SP202; RP4-529N6.1; PKMP5; AL157775.1; CNN3P1; SPTLC1P2; HIST1H1D; ZNF204P; ZNF391; RP1-153G14.4; MCFD2P1; ZNF184; HIST1H2AM; HIST1H2BO; RNU7-26P; OR2B2; RPLP2P1; AL662890.3
rs2849519	6	163132372	T	C	0.01574	0.005705	0.829	-0.03112	0.009021	0.8326	4.39028	1.132e-05	0.008601	0.007064	0.8182	-0.02284	0.01596	0.8298	1.80142	0.07157	0.02971	0.009615	0.8333	-0.03579	0.01085	0.8378	4.51809	6.23e-06	12	smoking behavior, body mass index	Justice AE, Nat Commun, 2017	RNU6-141P; Y_RNA; SOX4; RP3-322L4.2
rs62435247	6	169725827	G	A	0.01392	0.004407	0.3925	-0.02434	0.006792	0.3867	4.72551	2.298e-06	0.01805	0.005478	0.3674	-0.03275	0.01282	0.3902	3.64384	0.0002693	0.006414	0.007382	0.4024	-0.01898	0.007958	0.38	2.33946	0.01931	16	left ventricular structural measurement	Wild PS, J Clin Invest, 2017	HIST1H2BH
rs4728159	7	128856192	C	T	-0.0107	0.004606	0.7108	0.01001	0.007476	0.7018	-2.3585	0.01836	-0.01822	0.005824	0.7348	0.0523	0.01288	0.7085	-4.98885	6.071e-07	0.003655	0.007463	0.7012	-0.01045	0.008878	0.6889	1.21615	0.2238	11	-	-	-
rs190614966	7	128980332	C	T	-0.01369	0.007865	0.08602	0.0445	0.01202	0.07895	-4.05096	5.073e-05	-0.02126	0.009565	0.09848	0.07726	0.01991	0.08479	-4.46026	8.19e-06	0.00569	0.0138	0.08108	0.02804	0.0148	0.06778	-1.10449	0.2694	8	-	-	-
rs79668927	7	154114710	C	T	-0.007831	0.007884	0.08602	0.04277	0.01111	0.07971	-3.71435	0.0002045	0.003043	0.01021	0.08333	0.006119	0.02044	0.07317	-0.134628	0.8929	-0.02468	0.01231	0.08709	0.05794	0.01305	0.09222	-4.60539	4.145e-06	15	-	-	-
rs28695976	7	154115307	C	G	-0.007831	0.007884	0.08602	0.04277	0.01111	0.07971	-3.71435	0.0002045	0.003043	0.01021	0.08333	0.006119	0.02044	0.07317	-0.134628	0.8929	-0.02468	0.01231	0.08709	0.05794	0.01305	0.09222	-4.60539	4.145e-06	10	-	-	-
rs10256536	7	154118117	T	C	-0.008442	0.008028	0.0828	0.04093	0.01127	0.0759	-3.56812	0.0003582	0.00291	0.01034	0.08333	0.006119	0.02044	0.07085	-0.140091	0.8886	-0.02644	0.01263	0.08258	0.05595	0.01332	0.08556	-4.48847	7.231e-06	2	-	-	-
rs10256649	7	154118200	T	C	-0.01053	0.008477	0.07419	0.04345	0.01181	0.06979	-3.71318	0.0002054	0.00192	0.01081	0.07955	0.01055	0.02069	0.0662	-0.369692	0.7116	-0.03122	0.01354	0.07207	0.05882	0.01423	0.07667	-4.58396	4.561e-06	3	-	-	-
rs62475193	7	154476372	A	G	-0.008622	0.007957	0.07204	0.06234	0.01249	0.07551	-4.79173	1.648e-06	-0.008251	0.009592	0.05303	0.006422	0.02753	0.07782	-0.503307	0.6147	-0.01041	0.01426	0.07958	0.07674	0.01375	0.07111	-4.39944	1.078e-05	12	QT interval	Jeff JM, Ann Hum Genet, 2013	AC147651.1
rs115650684	7	158660582	T	C	-0.006864	0.007675	0.08602	0.01829	0.012	0.08581	-1.76588	0.07736	-0.01162	0.009186	0.06439	0.1219	0.02508	0.09175	-4.999	5.77e-07	0.003933	0.014	0.09459	-0.01055	0.01329	0.07444	0.750279	0.4531	5	-	-	-
rs6978311	7	158665920	A	G	-0.007053	0.007651	0.08602	0.01829	0.012	0.08658	-1.78076	0.07489	-0.01183	0.009146	0.06439	0.1219	0.02508	0.09292	-5.00944	5.47e-07	0.003933	0.014	0.09459	-0.01055	0.01329	0.07444	0.750279	0.4531	14	-	-	-
rs28890775	8	52207622	T	C	0.0006709	0.008132	0.07419	0.03928	0.01255	0.07666	-2.5818	0.009829	0.005335	0.01003	0.07576	0.1257	0.02141	0.0784	-5.09095	3.561e-07	-0.008255	0.01385	0.07357	0.004434	0.01479	0.07333	-0.626232	0.5311	79	-	-	-
rs74668330	8	84964772	A	T	-0.01001	0.008299	0.06774	0.06656	0.01344	0.06941	-4.84749	1.248e-06	-0.005643	0.01082	0.08712	0.06136	0.02346	0.06446	-2.5935	0.009506	-0.01627	0.01286	0.06006	0.06469	0.01638	0.07889	-3.88762	0.0001013	110	-	-	-
rs6996227	8	88310019	A	G	-0.006356	0.004537	0.3258	0.01375	0.007129	0.3272	-2.37933	0.01732	-0.003242	0.005589	0.303	0.06564	0.01343	0.3351	-4.73528	2.204e-06	-0.01204	0.007754	0.3348	-0.001998	0.008142	0.3122	-0.893137	0.372	105	-	-	-
rs13248587	8	88310176	T	C	-0.006356	0.004537	0.3258	0.01375	0.007129	0.3272	-2.37933	0.01732	-0.003242	0.005589	0.303	0.06564	0.01343	0.3351	-4.73528	2.204e-06	-0.01204	0.007754	0.3348	-0.001998	0.008142	0.3122	-0.893137	0.372	42	-	-	-
rs4639532	8	88310577	G	T	-0.006356	0.004537	0.3258	0.01375	0.007129	0.3272	-2.37933	0.01732	-0.003242	0.005589	0.303	0.06564	0.01343	0.3351	-4.73528	2.204e-06	-0.01204	0.007754	0.3348	-0.001998	0.008142	0.3122	-0.893137	0.372	83	-	-	-
rs13250066	8	88310648	G	C	-0.006356	0.004537	0.3258	0.01375	0.007129	0.3272	-2.37933	0.01732	-0.003242	0.005589	0.303	0.06564	0.01343	0.3351	-4.73528	2.204e-06	-0.01204	0.007754	0.3348	-0.001998	0.008142	0.3122	-0.893137	0.372	44	-	-	-
rs13248225	8	88310693	A	G	-0.006356	0.004537	0.3258	0.01375	0.007129	0.3272	-2.37933	0.01732	-0.003242	0.005589	0.303	0.06564	0.01343	0.3351	-4.73528	2.204e-06	-0.01204	0.007754	0.3348	-0.001998	0.008142	0.3122	-0.893137	0.372	41	-	-	-
8:88310816	8	88310816	G	C	-0.002962	0.004405	0.3677	0.01461	0.006914	0.3833	-2.14345	0.03211	0.000271	0.005471	0.3523	0.06453	0.01263	0.3943	-4.66862	3.024e-06	-0.009296	0.007415	0.3739	-0.001535	0.007964	0.3622	-0.713227	0.4757	1	-	-	-
rs10107746	8	88311222	C	T	-0.002039	0.004404	0.372	0.01524	0.006941	0.3844	-2.102	0.03556	0.0009503	0.005462	0.3523	0.06453	0.01263	0.3949	-4.62046	3.818e-06	-0.007827	0.007435	0.3799	-0.001052	0.008014	0.3644	-0.619754	0.5354	25	-	-	-
rs7833289	8	88312116	C	T	-0.002039	0.004404	0.372	0.01524	0.006941	0.3844	-2.102	0.03556	0.0009503	0.005462	0.3523	0.06453	0.01263	0.3949	-4.62046	3.818e-06	-0.007827	0.007435	0.3799	-0.001052	0.008014	0.3644	-0.619754	0.5354	120	-	-	-
rs13250073	8	88312559	A	G	-0.002039	0.004404	0.372	0.01524	0.006941	0.3844	-2.102	0.03556	0.0009503	0.005462	0.3523	0.06453	0.01263	0.3949	-4.62046	3.818e-06	-0.007827	0.007435	0.3799	-0.001052	0.008014	0.3644	-0.619754	0.5354	45	-	-	-
rs10094598	8	88313087	C	T	-0.002039	0.004404	0.372	0.01524	0.006941	0.3844	-2.102	0.03556	0.0009503	0.005462	0.3523	0.06453	0.01263	0.3949	-4.62046	3.818e-06	-0.007827	0.007435	0.3799	-0.001052	0.008014	0.3644	-0.619754	0.5354	10	-	-	-
rs10095078	8	88313520	C	T	-0.002039	0.004404	0.372	0.01524	0.006941	0.3844	-2.102	0.03556	0.0009503	0.005462	0.3523	0.06453	0.01263	0.3949	-4.62046	3.818e-06	-0.007827	0.007435	0.3799	-0.001052	0.008014	0.3644	-0.619754	0.5354	11	-	-	-
rs13263432	8	88313610	G	A	-0.002039	0.004404	0.372	0.01524	0.006941	0.3844	-2.102	0.03556	0.0009503	0.005462	0.3523	0.06453	0.01263	0.3949	-4.62046	3.818e-06	-0.007827	0.007435	0.3799	-0.001052	0.008014	0.3644	-0.619754	0.5354	53	-	-	-
rs28804163	8	88314127	T	A	-0.002039	0.004404	0.372	0.01524	0.006941	0.3844	-2.102	0.03556	0.0009503	0.005462	0.3523	0.06453	0.01263	0.3949	-4.62046	3.818e-06	-0.007827	0.007435	0.3799	-0.001052	0.008014	0.3644	-0.619754	0.5354	77	-	-	-
rs547683637	8	88316027	C	T	-0.002656	0.004403	0.371	0.01428	0.006938	0.3856	-2.06104	0.0393	0.0007728	0.005456	0.3523	0.06453	0.01263	0.3961	-4.63416	3.574e-06	-0.009168	0.00744	0.3784	-0.002352	0.008	0.3656	-0.623895	0.5327	93	-	-	-
rs28766910	8	88316378	A	G	-0.002204	0.004402	0.372	0.01524	0.006941	0.3841	-2.12235	0.03381	0.0006932	0.005458	0.3523	0.06453	0.01263	0.3943	-4.63968	3.48e-06	-0.007827	0.007435	0.3799	-0.001052	0.008014	0.3644	-0.619754	0.5354	76	-	-	-
rs7815598	8	88316794	G	A	-0.002039	0.004404	0.372	0.01524	0.006941	0.3844	-2.102	0.03556	0.0009503	0.005462	0.3523	0.06453	0.01263	0.3949	-4.62046	3.818e-06	-0.007827	0.007435	0.3799	-0.001052	0.008014	0.3644	-0.619754	0.5354	116	-	-	-
rs7823091	8	88317134	A	T	-0.002039	0.004404	0.372	0.01524	0.006941	0.3844	-2.102	0.03556	0.0009503	0.005462	0.3523	0.06453	0.01263	0.3949	-4.62046	3.818e-06	-0.007827	0.007435	0.3799	-0.001052	0.008014	0.3644	-0.619754	0.5354	117	-	-	-
rs13250425	8	88318667	C	T	-0.008581	0.006564	0.1086	0.0241	0.0108	0.1186	-2.58587	0.009727	-0.004992	0.008016	0.1326	0.08854	0.01835	0.1196	-4.67089	2.996e-06	-0.01624	0.01141	0.0991	-0.003015	0.01289	0.1167	-0.768246	0.4425	46	-	-	-
rs10100662	8	88318918	T	C	-0.002039	0.004404	0.371	0.01502	0.006967	0.3844	-2.06971	0.03851	0.0009503	0.005462	0.3523	0.06453	0.01263	0.3949	-4.62046	3.818e-06	-0.007827	0.007435	0.3784	-0.001421	0.00805	0.3644	-0.584586	0.5589	17	-	-	-
rs10087343	8	88319236	G	A	-0.002039	0.004404	0.371	0.01502	0.006967	0.3844	-2.06971	0.03851	0.0009503	0.005462	0.3523	0.06453	0.01263	0.3949	-4.62046	3.818e-06	-0.007827	0.007435	0.3784	-0.001421	0.00805	0.3644	-0.584586	0.5589	6	-	-	-
rs10108793	8	88321805	A	G	-0.001794	0.004404	0.371	0.01502	0.006967	0.3829	-2.03998	0.04138	0.001346	0.00546	0.3523	0.06453	0.01263	0.3926	-4.59197	4.378e-06	-0.007827	0.007435	0.3784	-0.001421	0.00805	0.3644	-0.584586	0.5589	27	-	-	-
rs10106392	8	88322223	G	A	-0.001801	0.004408	0.371	0.01502	0.006967	0.3837	-2.0403	0.04135	0.001351	0.005467	0.3523	0.06453	0.01263	0.3937	-4.59068	4.407e-06	-0.007827	0.007435	0.3784	-0.001421	0.00805	0.3644	-0.584586	0.5589	21	-	-	-
rs13281574	8	88323344	G	T	-0.002039	0.004404	0.372	0.01524	0.006941	0.3844	-2.102	0.03556	0.0009503	0.005462	0.3523	0.06453	0.01263	0.3949	-4.62046	3.818e-06	-0.007827	0.007435	0.3799	-0.001052	0.008014	0.3644	-0.619754	0.5354	61	-	-	-
rs13282511	8	88323674	C	T	-0.001801	0.004408	0.371	0.01502	0.006967	0.3837	-2.0403	0.04135	0.001351	0.005467	0.3523	0.06453	0.01263	0.3937	-4.59068	4.407e-06	-0.007827	0.007435	0.3784	-0.001421	0.00805	0.3644	-0.584586	0.5589	63	-	-	-
rs13282779	8	88323726	C	T	-0.001801	0.004408	0.371	0.01502	0.006967	0.3837	-2.0403	0.04135	0.001351	0.005467	0.3523	0.06453	0.01263	0.3937	-4.59068	4.407e-06	-0.007827	0.007435	0.3784	-0.001421	0.00805	0.3644	-0.584586	0.5589	64	-	-	-
rs10089048	8	88324121	C	T	-0.00265	0.0044	0.3742	0.01433	0.006993	0.3879	-2.05517	0.03981	0.0006046	0.005442	0.3561	0.06297	0.01274	0.3978	-4.50174	6.752e-06	-0.008801	0.007466	0.3814	-0.001648	0.008076	0.3689	-0.650372	0.5155	7	-	-	-
rs10098949	8	88324192	A	G	-0.002161	0.004408	0.372	0.01486	0.006975	0.3852	-2.06287	0.03911	0.001173	0.005462	0.3523	0.06453	0.01263	0.3949	-4.60428	4.126e-06	-0.008437	0.00745	0.3799	-0.001625	0.008063	0.3667	-0.620519	0.535	14	-	-	-
rs10099177	8	88324400	C	G	-0.001801	0.004408	0.371	0.01502	0.006967	0.3837	-2.0403	0.04135	0.001351	0.005467	0.3523	0.06453	0.01263	0.3937	-4.59068	4.407e-06	-0.007827	0.007435	0.3784	-0.001421	0.00805	0.3644	-0.584586	0.5589	15	-	-	-
rs10086526	8	88324510	T	A	-0.007979	0.006523	0.1108	0.02311	0.01062	0.1198	-2.49444	0.01264	-0.004159	0.007943	0.1326	0.08854	0.01835	0.1214	-4.63603	3.548e-06	-0.01624	0.01141	0.1021	-0.00318	0.01257	0.1167	-0.76931	0.4419	5	-	-	-
rs10108387	8	88326749	A	C	-0.002062	0.004406	0.3699	0.01466	0.006961	0.3833	-2.02981	0.04241	0.000949	0.005464	0.3523	0.06453	0.01263	0.3931	-4.62029	3.82e-06	-0.007827	0.007435	0.3769	-0.001775	0.008038	0.3644	-0.552726	0.5805	26	-	-	-
rs10098053	8	88327180	G	A	-0.001923	0.00441	0.371	0.01502	0.006967	0.3841	-2.05483	0.03991	0.001153	0.005471	0.3523	0.06453	0.01263	0.3943	-4.60454	4.124e-06	-0.007827	0.007435	0.3784	-0.001421	0.00805	0.3644	-0.584586	0.5589	13	-	-	-
rs6995133	8	88327867	A	C	-0.001578	0.004404	0.372	0.01524	0.006941	0.3829	-2.04592	0.04077	0.001646	0.00546	0.3523	0.06453	0.01263	0.3926	-4.57017	4.859e-06	-0.007827	0.007435	0.3799	-0.001052	0.008014	0.3644	-0.619754	0.5354	104	-	-	-
rs6980807	8	88328054	G	A	-0.002039	0.004404	0.372	0.01524	0.006941	0.3844	-2.102	0.03556	0.0009503	0.005462	0.3523	0.06453	0.01263	0.3949	-4.62046	3.818e-06	-0.007827	0.007435	0.3799	-0.001052	0.008014	0.3644	-0.619754	0.5354	100	-	-	-
rs6985516	8	88328439	C	T	-0.001925	0.004387	0.3591	0.01424	0.006859	0.3764	-1.98539	0.04705	0.001766	0.00544	0.3409	0.06421	0.01249	0.3873	-4.58363	4.555e-06	-0.009307	0.007404	0.3664	-0.002281	0.007906	0.3556	-0.648656	0.5166	102	-	-	-
8:88328500	8	88328500	G	C	-0.001776	0.004399	0.372	0.01524	0.006941	0.3833	-2.07068	0.03838	0.001344	0.00545	0.3523	0.06453	0.01263	0.3931	-4.59344	4.349e-06	-0.007827	0.007435	0.3799	-0.001052	0.008014	0.3644	-0.619754	0.5354	2	-	-	-
rs10092073	8	88329683	T	C	-0.001976	0.004406	0.372	0.01524	0.006941	0.3848	-2.09406	0.03626	0.001049	0.005466	0.3523	0.06453	0.01263	0.3955	-4.61276	3.961e-06	-0.007827	0.007435	0.3799	-0.001052	0.008014	0.3644	-0.619754	0.5354	9	-	-	-
rs4960937	8	88330433	C	T	-0.001838	0.00441	0.372	0.01524	0.006941	0.3841	-2.07674	0.03782	0.001271	0.005471	0.3523	0.06453	0.01263	0.3943	-4.59596	4.296e-06	-0.007827	0.007435	0.3799	-0.001052	0.008014	0.3644	-0.619754	0.5354	84	-	-	-
rs13282381	8	88331067	T	A	-0.001838	0.00441	0.372	0.01524	0.006941	0.3841	-2.07674	0.03782	0.001271	0.005471	0.3523	0.06453	0.01263	0.3943	-4.59596	4.296e-06	-0.007827	0.007435	0.3799	-0.001052	0.008014	0.3644	-0.619754	0.5354	62	-	-	-
rs13255099	8	88331118	C	T	-0.001838	0.00441	0.372	0.01524	0.006941	0.3841	-2.07674	0.03782	0.001271	0.005471	0.3523	0.06453	0.01263	0.3943	-4.59596	4.296e-06	-0.007827	0.007435	0.3799	-0.001052	0.008014	0.3644	-0.619754	0.5354	48	-	-	-
rs10110391	8	88332130	T	C	-0.001838	0.00441	0.372	0.01524	0.006941	0.3841	-2.07674	0.03782	0.001271	0.005471	0.3523	0.06453	0.01263	0.3943	-4.59596	4.296e-06	-0.007827	0.007435	0.3799	-0.001052	0.008014	0.3644	-0.619754	0.5354	29	-	-	-
rs10109580	8	88332172	A	G	-0.001838	0.00441	0.372	0.01524	0.006941	0.3841	-2.07674	0.03782	0.001271	0.005471	0.3523	0.06453	0.01263	0.3943	-4.59596	4.296e-06	-0.007827	0.007435	0.3799	-0.001052	0.008014	0.3644	-0.619754	0.5354	28	-	-	-
rs6993369	8	88332734	A	C	-0.001751	0.004415	0.372	0.01524	0.006941	0.3837	-2.06548	0.03887	0.001404	0.005481	0.3523	0.06453	0.01263	0.3937	-4.58497	4.527e-06	-0.007827	0.007435	0.3799	-0.001052	0.008014	0.3644	-0.619754	0.5354	103	-	-	-
rs7824234	8	88332858	T	C	-0.001451	0.004411	0.372	0.01524	0.006941	0.3829	-2.02954	0.0424	0.001846	0.005473	0.3523	0.06453	0.01263	0.3926	-4.55392	5.251e-06	-0.007827	0.007435	0.3799	-0.001052	0.008014	0.3644	-0.619754	0.5354	118	-	-	-
rs13252255	8	88333882	G	A	-0.001451	0.004411	0.372	0.01524	0.006941	0.3829	-2.02954	0.0424	0.001846	0.005473	0.3523	0.06453	0.01263	0.3926	-4.55392	5.251e-06	-0.007827	0.007435	0.3799	-0.001052	0.008014	0.3644	-0.619754	0.5354	47	-	-	-
rs13259727	8	88334001	G	A	-0.001543	0.004413	0.372	0.01524	0.006941	0.3833	-2.04046	0.0413	0.00172	0.005477	0.3523	0.06453	0.01263	0.3931	-4.56255	5.039e-06	-0.007827	0.007435	0.3799	-0.001052	0.008014	0.3644	-0.619754	0.5354	52	-	-	-
rs144619716	8	88339741	A	G	-0.001543	0.004413	0.372	0.01524	0.006941	0.3833	-2.04046	0.0413	0.00172	0.005477	0.3523	0.06453	0.01263	0.3931	-4.56255	5.039e-06	-0.007827	0.007435	0.3799	-0.001052	0.008014	0.3644	-0.619754	0.5354	66	-	-	-
rs13275326	8	88339764	T	C	-0.001543	0.004413	0.372	0.01524	0.006941	0.3833	-2.04046	0.0413	0.00172	0.005477	0.3523	0.06453	0.01263	0.3931	-4.56255	5.039e-06	-0.007827	0.007435	0.3799	-0.001052	0.008014	0.3644	-0.619754	0.5354	57	-	-	-
rs10113842	8	88339999	G	C	-0.001543	0.004413	0.372	0.01524	0.006941	0.3833	-2.04046	0.0413	0.00172	0.005477	0.3523	0.06453	0.01263	0.3931	-4.56255	5.039e-06	-0.007827	0.007435	0.3799	-0.001052	0.008014	0.3644	-0.619754	0.5354	30	-	-	-
rs10101400	8	88340865	G	A	-0.001374	0.004417	0.372	0.01524	0.006941	0.3841	-2.01939	0.04344	0.00197	0.005484	0.3523	0.06453	0.01263	0.3943	-4.54347	5.52e-06	-0.007827	0.007435	0.3799	-0.001052	0.008014	0.3644	-0.619754	0.5354	19	-	-	-
rs10107283	8	88340896	G	T	-0.001543	0.004413	0.372	0.01524	0.006941	0.3833	-2.04046	0.0413	0.00172	0.005477	0.3523	0.06453	0.01263	0.3931	-4.56255	5.039e-06	-0.007827	0.007435	0.3799	-0.001052	0.008014	0.3644	-0.619754	0.5354	24	-	-	-
8:88341350	8	88341350	G	T	-0.002039	0.004404	0.372	0.01524	0.006941	0.3844	-2.102	0.03556	0.0009503	0.005462	0.3523	0.06453	0.01263	0.3949	-4.62046	3.818e-06	-0.007827	0.007435	0.3799	-0.001052	0.008014	0.3644	-0.619754	0.5354	3	-	-	-
rs4960938	8	88343019	G	T	-0.002039	0.004404	0.372	0.01524	0.006941	0.3844	-2.102	0.03556	0.0009503	0.005462	0.3523	0.06453	0.01263	0.3949	-4.62046	3.818e-06	-0.007827	0.007435	0.3799	-0.001052	0.008014	0.3644	-0.619754	0.5354	85	-	-	-
rs10104872	8	88343666	A	G	-0.002039	0.004404	0.372	0.01524	0.006941	0.3844	-2.102	0.03556	0.0009503	0.005462	0.3523	0.06453	0.01263	0.3949	-4.62046	3.818e-06	-0.007827	0.007435	0.3799	-0.001052	0.008014	0.3644	-0.619754	0.5354	20	-	-	-
rs4961029	8	88344210	C	T	-0.002039	0.004404	0.372	0.01524	0.006941	0.3844	-2.102	0.03556	0.0009503	0.005462	0.3523	0.06453	0.01263	0.3949	-4.62046	3.818e-06	-0.007827	0.007435	0.3799	-0.001052	0.008014	0.3644	-0.619754	0.5354	87	-	-	-
rs34239326	8	88344412	C	T	-0.002039	0.004404	0.372	0.01524	0.006941	0.3844	-2.102	0.03556	0.0009503	0.005462	0.3523	0.06453	0.01263	0.3949	-4.62046	3.818e-06	-0.007827	0.007435	0.3799	-0.001052	0.008014	0.3644	-0.619754	0.5354	80	-	-	-
rs6468771	8	88344739	C	G	-0.007932	0.006548	0.1086	0.02214	0.01081	0.1182	-2.37939	0.01733	-0.004694	0.007985	0.1288	0.08507	0.01866	0.119	-4.42259	9.775e-06	-0.01477	0.01142	0.1006	-0.003027	0.01283	0.1167	-0.683675	0.4941	97	-	-	-
rs6468772	8	88344898	T	C	-0.007932	0.006548	0.1086	0.02214	0.01081	0.1182	-2.37939	0.01733	-0.004694	0.007985	0.1288	0.08507	0.01866	0.119	-4.42259	9.775e-06	-0.01477	0.01142	0.1006	-0.003027	0.01283	0.1167	-0.683675	0.4941	98	-	-	-
rs7813217	8	88345118	A	T	-0.007932	0.006548	0.1086	0.02214	0.01081	0.1182	-2.37939	0.01733	-0.004694	0.007985	0.1288	0.08507	0.01866	0.119	-4.42259	9.775e-06	-0.01477	0.01142	0.1006	-0.003027	0.01283	0.1167	-0.683675	0.4941	114	-	-	-
rs7844017	8	88345173	C	A	-0.002039	0.004404	0.372	0.01524	0.006941	0.3844	-2.102	0.03556	0.0009503	0.005462	0.3523	0.06453	0.01263	0.3949	-4.62046	3.818e-06	-0.007827	0.007435	0.3799	-0.001052	0.008014	0.3644	-0.619754	0.5354	124	-	-	-
rs7005179	8	88346979	A	G	-0.002116	0.004379	0.3731	0.0152	0.006918	0.3905	-2.11494	0.03438	0.001118	0.005453	0.3523	0.06453	0.01263	0.3995	-4.60947	4.027e-06	-0.008405	0.007325	0.3814	-0.0009948	0.007978	0.3733	-0.684185	0.4939	106	-	-	-
rs10095774	8	88347899	C	G	-0.002039	0.004404	0.372	0.01524	0.006941	0.3844	-2.102	0.03556	0.0009503	0.005462	0.3523	0.06453	0.01263	0.3949	-4.62046	3.818e-06	-0.007827	0.007435	0.3799	-0.001052	0.008014	0.3644	-0.619754	0.5354	12	-	-	-
rs10100168	8	88349312	A	G	-0.007932	0.006548	0.1086	0.02214	0.01081	0.1182	-2.37939	0.01733	-0.004694	0.007985	0.1288	0.08507	0.01866	0.119	-4.42259	9.775e-06	-0.01477	0.01142	0.1006	-0.003027	0.01283	0.1167	-0.683675	0.4941	16	-	-	-
rs10101149	8	88349403	T	C	-0.007932	0.006548	0.1086	0.02214	0.01081	0.1182	-2.37939	0.01733	-0.004694	0.007985	0.1288	0.08507	0.01866	0.119	-4.42259	9.775e-06	-0.01477	0.01142	0.1006	-0.003027	0.01283	0.1167	-0.683675	0.4941	18	-	-	-
rs7837818	8	88350236	C	T	-0.002104	0.004406	0.372	0.01524	0.006941	0.3848	-2.10963	0.0349	0.0009503	0.005462	0.3523	0.06453	0.01263	0.3949	-4.62046	3.818e-06	-0.008051	0.007443	0.3799	-0.001052	0.008014	0.3656	-0.639926	0.5222	123	-	-	-
rs10282857	8	88355879	G	A	-0.007932	0.006548	0.1086	0.02214	0.01081	0.1182	-2.37939	0.01733	-0.004694	0.007985	0.1288	0.08507	0.01866	0.119	-4.42259	9.775e-06	-0.01477	0.01142	0.1006	-0.003027	0.01283	0.1167	-0.683675	0.4941	31	-	-	-
rs13249174	8	88362923	G	A	-0.008263	0.006535	0.1086	0.02214	0.01081	0.119	-2.40686	0.01608	-0.004636	0.007974	0.1288	0.08507	0.01866	0.1196	-4.42068	9.863e-06	-0.01595	0.01138	0.1006	-0.003027	0.01283	0.1178	-0.753539	0.4511	43	-	-	-
rs28629293	8	88364148	T	G	-0.008263	0.006535	0.1086	0.02214	0.01081	0.119	-2.40686	0.01608	-0.004636	0.007974	0.1288	0.08507	0.01866	0.1196	-4.42068	9.863e-06	-0.01595	0.01138	0.1006	-0.003027	0.01283	0.1178	-0.753539	0.4511	75	-	-	-
rs13277033	8	88366337	A	G	-0.008849	0.006541	0.1086	0.02214	0.01081	0.1186	-2.45265	0.01417	-0.005478	0.007985	0.1288	0.08507	0.01866	0.119	-4.46122	8.167e-06	-0.01595	0.01138	0.1006	-0.003027	0.01283	0.1178	-0.753539	0.4511	58	-	-	-
rs7836295	8	88368506	G	A	-0.008849	0.006541	0.1086	0.02214	0.01081	0.1186	-2.45265	0.01417	-0.005478	0.007985	0.1288	0.08507	0.01866	0.119	-4.46122	8.167e-06	-0.01595	0.01138	0.1006	-0.003027	0.01283	0.1178	-0.753539	0.4511	121	-	-	-
rs67620422	8	88371229	G	A	0.007744	0.004283	0.4301	-0.01221	0.006933	0.4138	2.44856	0.01433	0.003049	0.005405	0.4242	-0.05432	0.0117	0.3984	4.4513	8.511e-06	0.01523	0.007009	0.4324	0.006312	0.008261	0.4433	0.823168	0.4104	99	-	-	-
rs10106994	8	88376921	G	A	-0.007782	0.004307	0.4516	0.008631	0.006668	0.4462	-2.06764	0.03867	-0.005845	0.005354	0.428	0.05365	0.012	0.4588	-4.5277	5.927e-06	-0.0118	0.007248	0.461	-0.007839	0.00774	0.4222	-0.373544	0.709	22	-	-	-
rs11990638	8	88377224	C	T	-0.008013	0.004311	0.4505	0.008511	0.006657	0.4458	-2.08348	0.0372	-0.005845	0.005354	0.428	0.05365	0.012	0.4588	-4.5277	5.927e-06	-0.01251	0.007267	0.4595	-0.007887	0.007721	0.4211	-0.43601	0.6629	38	-	-	-
rs10283270	8	88377699	G	A	-0.007782	0.004307	0.4516	0.008631	0.006668	0.4462	-2.06764	0.03867	-0.005845	0.005354	0.428	0.05365	0.012	0.4588	-4.5277	5.927e-06	-0.0118	0.007248	0.461	-0.007839	0.00774	0.4222	-0.373544	0.709	32	-	-	-
rs71504322	8	88382045	A	C	-0.008263	0.006535	0.1086	0.02214	0.01081	0.119	-2.40686	0.01608	-0.004636	0.007974	0.1288	0.08507	0.01866	0.1196	-4.42068	9.863e-06	-0.01595	0.01138	0.1006	-0.003027	0.01283	0.1178	-0.753539	0.4511	107	-	-	-
rs10091075	8	88383745	G	A	-0.007587	0.004319	0.4624	0.009304	0.00667	0.4508	-2.12566	0.03352	-0.005094	0.005377	0.447	0.05336	0.01178	0.464	-4.51412	6.353e-06	-0.01257	0.007246	0.4685	-0.007807	0.007792	0.4256	-0.44763	0.6547	8	-	-	-
rs2337042	8	88385793	A	T	-0.007587	0.004319	0.4624	0.009304	0.00667	0.4508	-2.12566	0.03352	-0.005094	0.005377	0.447	0.05336	0.01178	0.464	-4.51412	6.353e-06	-0.01257	0.007246	0.4685	-0.007807	0.007792	0.4256	-0.44763	0.6547	74	-	-	-
rs6981957	8	88386459	C	A	-0.008263	0.006535	0.1086	0.02214	0.01081	0.119	-2.40686	0.01608	-0.004636	0.007974	0.1288	0.08507	0.01866	0.1196	-4.42068	9.863e-06	-0.01595	0.01138	0.1006	-0.003027	0.01283	0.1178	-0.753539	0.4511	101	-	-	-
rs13256194	8	88389204	C	T	-0.008296	0.006529	0.1086	0.02214	0.01081	0.1194	-2.41007	0.01594	-0.004691	0.007964	0.1288	0.08507	0.01866	0.1202	-4.42424	9.698e-06	-0.01595	0.01138	0.1006	-0.003027	0.01283	0.1178	-0.753539	0.4511	50	-	-	-
rs13268575	8	88391237	C	A	-0.00737	0.005177	0.2194	0.01374	0.008206	0.2262	-2.17571	0.02958	-0.005469	0.006351	0.2159	0.07829	0.01501	0.2288	-5.13912	2.769e-07	-0.01215	0.008917	0.2207	-0.007716	0.009399	0.2211	-0.342239	0.732	55	-	-	-
rs13259432	8	88392706	C	G	-0.007212	0.004318	0.4645	0.009527	0.006665	0.4497	-2.10779	0.03505	-0.004684	0.00538	0.4508	0.055	0.0118	0.4628	-4.6022	4.174e-06	-0.01233	0.007235	0.47	-0.007772	0.007767	0.4244	-0.429405	0.6678	51	-	-	-
rs13265042	8	88396054	G	A	-0.007581	0.004327	0.4656	0.009143	0.006678	0.45	-2.10172	0.03558	-0.005072	0.005392	0.4583	0.05308	0.01183	0.4628	-4.47293	7.731e-06	-0.01257	0.007246	0.4685	-0.007807	0.007792	0.4256	-0.44763	0.6547	54	-	-	-
8:88397882	8	88397882	C	G	-0.008296	0.006529	0.1097	0.02274	0.01077	0.1194	-2.46426	0.01375	-0.004691	0.007964	0.1288	0.08507	0.01866	0.1202	-4.42424	9.698e-06	-0.01595	0.01138	0.1021	-0.002125	0.01277	0.1178	-0.808248	0.419	4	-	-	-
rs7827859	8	88398670	A	G	-0.007587	0.004319	0.4634	0.009633	0.00668	0.4508	-2.16478	0.03041	-0.005094	0.005377	0.4508	0.055	0.0118	0.464	-4.63426	3.578e-06	-0.01257	0.007246	0.4685	-0.007807	0.007792	0.4256	-0.44763	0.6547	119	-	-	-
rs13281007	8	88401572	T	A	-0.007715	0.006536	0.1097	0.02274	0.01077	0.119	-2.41743	0.01565	-0.004691	0.007964	0.1288	0.08507	0.01866	0.1202	-4.42424	9.698e-06	-0.0142	0.01142	0.1021	-0.002125	0.01277	0.1167	-0.704841	0.4808	60	-	-	-
rs13277952	8	88401583	T	G	-0.007318	0.004317	0.4634	0.009633	0.00668	0.4504	-2.13125	0.03307	-0.005094	0.005377	0.4508	0.055	0.0118	0.464	-4.63426	3.578e-06	-0.01178	0.007237	0.4685	-0.007807	0.007792	0.4244	-0.373601	0.7085	59	-	-	-
rs184121830	8	88402262	T	A	-0.007587	0.004319	0.4634	0.009633	0.00668	0.4508	-2.16478	0.03041	-0.005094	0.005377	0.4508	0.055	0.0118	0.464	-4.63426	3.578e-06	-0.01257	0.007246	0.4685	-0.007807	0.007792	0.4256	-0.44763	0.6547	71	-	-	-
rs13255866	8	88403517	C	T	-0.007587	0.004319	0.4634	0.009633	0.00668	0.4508	-2.16478	0.03041	-0.005094	0.005377	0.4508	0.055	0.0118	0.464	-4.63426	3.578e-06	-0.01257	0.007246	0.4685	-0.007807	0.007792	0.4256	-0.44763	0.6547	49	-	-	-
rs4961032	8	88405129	G	C	-0.008967	0.006534	0.1097	0.02274	0.01077	0.119	-2.51701	0.01186	-0.00566	0.007974	0.1288	0.08507	0.01866	0.1196	-4.47114	7.796e-06	-0.01595	0.01138	0.1021	-0.002125	0.01277	0.1178	-0.808248	0.419	88	-	-	-
rs13275312	8	88405893	A	C	-0.008967	0.006534	0.1086	0.02214	0.01081	0.119	-2.4627	0.01378	-0.00566	0.007974	0.1288	0.08507	0.01866	0.1196	-4.47114	7.796e-06	-0.01595	0.01138	0.1006	-0.003027	0.01283	0.1178	-0.753539	0.4511	56	-	-	-
rs3922614	8	88413427	C	T	-0.004883	0.008381	0.06344	0.03539	0.01407	0.06979	-2.45912	0.01393	0.0007486	0.01038	0.07955	0.1121	0.02295	0.06852	-4.42077	9.782e-06	-0.01732	0.01415	0.05706	0.0008133	0.01712	0.07222	-0.81642	0.4144	81	-	-	-
rs10107014	8	88421332	A	G	-0.009562	0.00657	0.1097	0.02303	0.01077	0.1182	-2.58343	0.009793	-0.006479	0.008037	0.1288	0.08507	0.01866	0.1185	-4.50598	6.622e-06	-0.01595	0.01138	0.1021	-0.00154	0.01277	0.1178	-0.842449	0.3996	23	-	-	-
rs4961034	8	88439189	A	G	-0.009562	0.00657	0.1108	0.02465	0.01073	0.1182	-2.7192	0.00655	-0.006479	0.008037	0.1326	0.08921	0.01832	0.1185	-4.78316	1.734e-06	-0.01595	0.01138	0.1021	-0.00154	0.01277	0.1178	-0.842449	0.3996	89	-	-	-
rs4961035	8	88446402	G	A	-0.009634	0.006576	0.1108	0.02465	0.01073	0.1178	-2.72424	0.006451	-0.006551	0.008048	0.1326	0.08921	0.01832	0.1179	-4.7857	1.712e-06	-0.01595	0.01138	0.1021	-0.00154	0.01277	0.1178	-0.842449	0.3996	90	-	-	-
rs4418360	8	88452971	C	G	-0.008188	0.004398	0.4129	0.009026	0.006719	0.4016	-2.1436	0.03207	-0.005208	0.005499	0.4167	0.05421	0.01157	0.4082	-4.6383	3.517e-06	-0.01459	0.007292	0.4114	-0.009985	0.007904	0.3889	-0.428217	0.6688	82	-	-	-
rs28841989	8	88453028	A	C	-0.008481	0.004392	0.4118	0.009208	0.00671	0.3993	-2.20572	0.0274	-0.005662	0.005487	0.4167	0.05421	0.01157	0.4048	-4.67562	2.934e-06	-0.01459	0.007292	0.4099	-0.009672	0.00789	0.3889	-0.45776	0.6475	78	-	-	-
rs4960940	8	88454380	G	A	-0.009634	0.006576	0.1097	0.02378	0.01077	0.1178	-2.64793	0.0081	-0.006551	0.008048	0.1326	0.08921	0.01832	0.1179	-4.7857	1.712e-06	-0.01595	0.01138	0.1006	-0.003027	0.01283	0.1178	-0.753539	0.4511	86	-	-	-
rs9792389	8	88461083	T	A	-0.008661	0.004308	0.4613	0.009055	0.006802	0.4416	-2.20035	0.02778	-0.008124	0.005374	0.4432	0.04955	0.01183	0.4501	-4.43871	9.052e-06	-0.009907	0.00719	0.4685	-0.008017	0.008029	0.4256	-0.17536	0.8608	126	-	-	-
rs73338657	8	126648227	G	C	-0.006331	0.004738	0.2731	0.03257	0.007338	0.283	-4.45362	8.444e-06	-0.008071	0.005797	0.2348	0.02891	0.01511	0.2805	-2.28505	0.02231	-0.000668	0.008206	0.2883	0.03352	0.00834	0.2878	-2.92201	0.003479	108	-	-	-
rs60074719	8	126648484	G	A	-0.006365	0.004738	0.2731	0.03257	0.007338	0.2834	-4.45751	8.296e-06	-0.008112	0.005798	0.2348	0.02891	0.01511	0.2811	-2.28754	0.02216	-0.000668	0.008206	0.2883	0.03352	0.00834	0.2878	-2.92201	0.003479	96	-	-	-
rs16900764	8	126648806	C	T	-0.006365	0.004738	0.2731	0.03257	0.007338	0.2834	-4.45751	8.296e-06	-0.008112	0.005798	0.2348	0.02891	0.01511	0.2811	-2.28754	0.02216	-0.000668	0.008206	0.2883	0.03352	0.00834	0.2878	-2.92201	0.003479	68	-	-	-
rs16900766	8	126649041	G	A	-0.006365	0.004738	0.2731	0.03257	0.007338	0.2834	-4.45751	8.296e-06	-0.008112	0.005798	0.2348	0.02891	0.01511	0.2811	-2.28754	0.02216	-0.000668	0.008206	0.2883	0.03352	0.00834	0.2878	-2.92201	0.003479	69	-	-	-
rs56883151	8	126649098	A	C	-0.006353	0.004738	0.2742	0.03252	0.007341	0.283	-4.44913	8.616e-06	-0.008112	0.005798	0.2348	0.02891	0.01511	0.2811	-2.28754	0.02216	-0.0007642	0.008202	0.2898	0.03347	0.008346	0.2867	-2.92559	0.003435	94	-	-	-
rs59352476	8	126649240	T	C	-0.006365	0.004738	0.2731	0.03257	0.007338	0.2834	-4.45751	8.296e-06	-0.008112	0.005798	0.2348	0.02891	0.01511	0.2811	-2.28754	0.02216	-0.000668	0.008206	0.2883	0.03352	0.00834	0.2878	-2.92201	0.003479	95	-	-	-
rs74815096	8	128577675	C	T	-0.002365	0.005237	0.2032	0.003398	0.00829	0.1937	-0.587724	0.5567	-0.005894	0.006479	0.2424	0.06323	0.01393	0.1922	-4.49938	6.793e-06	0.005322	0.00886	0.1877	-0.02555	0.009828	0.1967	2.33311	0.01965	111	-	-	-
rs112963694	9	12039550	T	G	-0.008985	0.009705	0.07204	0.03805	0.0129	0.05378	-2.91364	0.003571	0.01377	0.01198	0.06439	0.008265	0.02418	0.05575	0.204002	0.8383	-0.05547	0.0163	0.07508	0.04777	0.0151	0.05	-4.6464	3.375e-06	7	-	-	-
rs58190827	9	12041806	G	C	-0.009068	0.009735	0.07097	0.04005	0.01318	0.05339	-2.99766	0.002715	0.01381	0.01203	0.06061	0.01105	0.02616	0.05517	0.0958549	0.9237	-0.05547	0.0163	0.07508	0.04777	0.0151	0.05	-4.6464	3.375e-06	17	-	-	-
rs112304174	9	12042584	G	C	-0.009068	0.009735	0.07097	0.04005	0.01318	0.05339	-2.99766	0.002715	0.01381	0.01203	0.06061	0.01105	0.02616	0.05517	0.0958549	0.9237	-0.05547	0.0163	0.07508	0.04777	0.0151	0.05	-4.6464	3.375e-06	5	-	-	-
rs116544389	9	20914358	C	A	-0.009913	0.007737	0.08387	0.04779	0.0121	0.08734	-4.01772	5.893e-05	-0.004841	0.00913	0.06818	0.01175	0.02502	0.0993	-0.622931	0.5334	-0.03056	0.01478	0.09009	0.0597	0.01363	0.06444	-4.48935	7.121e-06	10	-	-	-
rs10964835	9	21099991	A	G	0.006599	0.004396	0.4194	-0.0231	0.006889	0.4058	3.6342	0.0002782	-0.00205	0.005464	0.4205	-0.0195	0.01304	0.4158	1.23422	0.217	0.02405	0.007322	0.4189	-0.02481	0.008039	0.3867	4.49341	7.033e-06	2	-	-	-
rs10964836	9	21100141	T	C	0.007239	0.00442	0.4194	-0.0231	0.006889	0.3989	3.70664	0.0002097	-0.0009439	0.005484	0.4205	-0.0195	0.01304	0.4077	1.31173	0.1894	0.02408	0.007391	0.4189	-0.02481	0.008039	0.3822	4.47699	7.603e-06	3	-	-	-
rs10964838	9	21100743	A	G	0.008059	0.004392	0.4301	-0.01974	0.006927	0.4138	3.38929	0.0007006	-0.000894	0.005448	0.4356	-0.0155	0.01296	0.4239	1.03894	0.2989	0.02718	0.007332	0.4279	-0.02172	0.008123	0.3944	4.46876	7.891e-06	4	-	-	-
rs78358165	9	78492036	T	C	0.008704	0.005067	0.2398	-0.02068	0.007795	0.2326	3.16055	0.001574	0.01118	0.006271	0.2159	-0.06069	0.01482	0.2364	4.46615	7.978e-06	0.001715	0.008575	0.2492	-0.009192	0.00898	0.2256	0.878423	0.3797	23	smoking behavior, BMI-adjusted waist circumference	Justice AE, Nat Commun, 2017	RP11-109M17.1; HMGN2P16
rs7867553	9	78492815	C	G	0.009647	0.005077	0.2398	-0.02068	0.007795	0.2323	3.26006	0.001113	0.01226	0.006288	0.2159	-0.06069	0.01482	0.2369	4.53139	5.868e-06	0.002564	0.00858	0.2492	-0.009192	0.00898	0.2233	0.946537	0.3439	26	smoking behavior, BMI-adjusted waist circumference	Justice AE, Nat Commun, 2017	RP11-109M17.1; HMGN2P16
rs7863217	9	78495308	C	A	0.00944	0.005101	0.2376	-0.02105	0.007841	0.2311	3.25949	0.001118	0.01208	0.00631	0.2159	-0.06069	0.01482	0.2364	4.5178	6.259e-06	0.002158	0.008642	0.2462	-0.009623	0.009049	0.2211	0.941521	0.3465	24	smoking behavior, BMI-adjusted waist circumference	Justice AE, Nat Commun, 2017	RP11-109M17.1; HMGN2P16
rs7866449	9	78495438	C	T	0.009489	0.005112	0.2387	-0.02077	0.007796	0.2311	3.24578	0.001168	0.01217	0.006309	0.2159	-0.06069	0.01482	0.2369	4.5235	6.084e-06	0.001941	0.008702	0.2477	-0.009502	0.008979	0.22	0.915155	0.3601	25	smoking behavior, BMI-adjusted waist circumference	Justice AE, Nat Commun, 2017	RP11-109M17.1; HMGN2P16
rs28687781	9	78496674	G	A	0.009766	0.005088	0.2376	-0.02162	0.007792	0.2319	3.37264	0.0007447	0.01255	0.006266	0.2159	-0.06069	0.01482	0.2381	4.55183	5.325e-06	0.001941	0.008702	0.2462	-0.01061	0.008975	0.22	1.004	0.3152	15	smoking behavior, BMI-adjusted waist circumference	Justice AE, Nat Commun, 2017	RP11-109M17.1; HMGN2P16
rs7022215	9	78501459	C	G	0.009431	0.005077	0.2376	-0.02162	0.007792	0.2326	3.33879	0.0008417	0.01224	0.006246	0.2159	-0.06069	0.01482	0.2387	4.53476	5.777e-06	0.001523	0.008699	0.2462	-0.01061	0.008975	0.2211	0.970723	0.3315	20	smoking behavior, BMI-adjusted waist circumference	Justice AE, Nat Commun, 2017	RP11-109M17.1; HMGN2P16
rs58733878	9	126968674	C	G	-0.00226	0.006297	0.1344	0.03529	0.01016	0.1362	-3.14143	0.001682	-0.005478	0.007739	0.1136	0.09281	0.02021	0.144	-4.54173	5.591e-06	0.004046	0.01083	0.1426	0.0192	0.01154	0.1211	-0.957542	0.3382	18	smoking behavior, 3-hydroxy-1-methylpropylmercapturic acid measurement	Park SL, PLoS One, 2015	HNRNPA1P41
rs11793060	9	133407956	C	T	-0.02099	0.007606	0.0957	0.02185	0.01113	0.08162	-3.17789	0.001484	-0.004729	0.009315	0.09091	0.001626	0.02158	0.08304	-0.270373	0.7869	-0.0551	0.01301	0.0976	0.02753	0.01286	0.07889	-4.51699	6.28e-06	11	-	-	-
rs112473634	9	136780781	T	C	-0.001584	0.008101	0.09355	0.04489	0.01149	0.07742	-3.30572	0.0009481	-0.007109	0.009637	0.09848	0.09267	0.02037	0.08362	-4.42781	9.516e-06	0.01456	0.01501	0.09159	0.02374	0.01362	0.06556	-0.452924	0.6506	6	-	-	-

## Sheet: SuppTable_2a_FuncAnnNan
Supplementary Table 2a. Functional annotation for suggestive SNPs associated with Gene-Smoking interaction for cIMT in Nanoro sample
Note: ANNOVAR = functional variant classification based on position in or outside of a gene; CADD = Combined Annotation-Dependent depletion score, a marker of deleteriousness of SNP's effect on a protein product (higher scores are more deleterious); RDB = RegulomeDB scores, which predict likelihood that a SNP has a regulatory role (lower scores are more likely); minChrState = minimum chromatin st…
uniqID	rsID	chr	pos	non_effect_allele	effect_allele	MAF	gwasP	beta	r2	IndSigSNP	GenomicLocus	nearestGene	dist	func	CADD	RDB	minChrState	commonChrState
1:10807369:A:G	1:10807369	1	10807369	A	G	0.2254	0.005067	-2.803	0.700706	rs205482	1	CASZ1	0	intronic	3.247	5	5	15
1:10807936:C:T	rs451911	1	10807936	C	T	0.205	0.002058	-3.082	0.67021	rs205482	1	CASZ1	0	intronic	0.189	5	4	15
1:10811672:C:T	rs205478	1	10811672	C	T	0.149	8.905e-06	-4.442	0.790246	rs205482	1	CASZ1	0	intronic	15.35	5	4	15
1:10813675:G:T	rs205482	1	10813675	G	T	0.1702	5.163e-06	-4.558	1	rs205482	1	CASZ1	0	intronic	12.61	2b	5	15
1:84737302:C:T	rs616472	1	84737302	T	C	0.3782	4.093e-06	4.607	1	rs616472	2	SNORA2	5701	intergenic	7.828	NA	2	15
1:85262902:A:G	rs11161454	1	85262902	A	G	0.1082	4.077e-06	-4.607	1	rs11161454	2	AC104169.1	4019	intergenic	3.578	6	1	15
1:85264974:A:G	rs12564032	1	85264974	G	A	0.1036	8.866e-06	-4.443	0.900152	rs11161454	2	AC104169.1	6091	intergenic	3.741	7	5	15
1:85271091:C:T	rs10873658	1	85271091	T	C	0.09985	6.141e-06	-4.521	0.75196	rs11161454	2	LPAR3	6193	intergenic	2.57	5	5	15
1:85274012:A:T	rs4256829	1	85274012	A	T	0.09682	6.141e-06	-4.521	0.795979	rs11161454	2	LPAR3	3272	intergenic	4.759	6	5	15
1:85275714:A:G	rs2892844	1	85275714	G	A	0.1014	6.337e-06	-4.515	0.737737	rs11161454	2	LPAR3	1570	intergenic	3.159	6	5	15
1:85276032:A:T	rs4243771	1	85276032	T	A	0.1021	1.176e-05	-4.382	0.730775	rs11161454	2	LPAR3	1252	intergenic	2.32	5	5	15
1:85278665:A:G	rs11161462	1	85278665	G	A	0.2095	0.0002271	-3.687	0.811838	rs9662096	2	LPAR3	0	UTR3	4.518	6	5	15
1:85279077:C:T	rs9729018	1	85279077	T	C	0.1225	2.241e-06	-4.73	0.84037	rs11161464	2	LPAR3	0	UTR3	3.847	7	5	15
1:85283089:A:T	rs9662096	1	85283089	T	A	0.1831	9.12e-06	-4.437	1	rs9662096	2	LPAR3	0	intronic	0.701	7	5	15
1:85286679:C:T	rs9727725	1	85286679	T	C	0.115	1.006e-06	-4.891	0.910139	rs11161464	2	LPAR3	0	intronic	8.388	5	5	15
1:85298111:A:G	rs11161464	1	85298111	G	A	0.118	7.335e-07	-4.952	1	rs11161464	2	LPAR3	0	intronic	3.493	6	5	15
1:85305485:G:T	rs9725247	1	85305485	T	G	0.1225	3.175e-05	-4.161	0.788913	rs11161464	2	LPAR3	0	intronic	5.625	5	5	15
1:85308830:C:G	rs9726895	1	85308830	C	G	0.1278	3.129e-05	-4.164	0.729459	rs11161464	2	LPAR3	0	intronic	6.5	5	2	15
1:85312366:C:T	rs1325272	1	85312366	C	T	0.1225	1.967e-05	-4.269	0.777504	rs11161464	2	LPAR3	0	intronic	20.2	4	5	15
1:175118895:C:T	rs12747817	1	175118895	T	C	0.32	8.534e-05	-3.929	0.915218	rs1057305	3	TNN	1692	intergenic	1.903	5	5	14
1:175120079:A:C	rs6701037	1	175120079	C	A	0.32	2.17e-05	-4.247	0.915218	rs1057305	3	TNN	2876	intergenic	0.875	1f	5	14
1:175120469:C:T	rs10912898	1	175120469	T	C	0.416	0.001498	-3.175	0.621209	rs1057305	3	TNN	3266	intergenic	4.325	3a	5	14
1:175120715:A:G	rs10912899	1	175120715	A	G	0.4168	0.001498	-3.175	0.620397	rs1057305	3	TNN	3512	intergenic	0.314	4	5	14
1:175122123:A:G	rs7514749	1	175122123	G	A	0.32	2.17e-05	-4.247	0.915218	rs1057305	3	KIAA0040	3999	intergenic	2.015	5	5	14
1:175122759:A:G	rs34493921	1	175122759	G	A	0.32	2.388e-05	-4.225	0.915218	rs1057305	3	KIAA0040	3363	intergenic	3.805	4	2	14
1:175123186:C:G	rs11585617	1	175123186	G	C	0.32	2.17e-05	-4.247	0.915218	rs1057305	3	KIAA0040	2936	intergenic	0.151	4	1	14
1:175123288:C:T	rs11580331	1	175123288	C	T	0.32	2.17e-05	-4.247	0.915218	rs1057305	3	KIAA0040	2834	intergenic	1.863	5	5	14
1:175123858:A:C	rs6702010	1	175123858	A	C	0.32	2.17e-05	-4.247	0.915218	rs1057305	3	KIAA0040	2264	intergenic	3.383	7	5	14
1:175123897:C:G	rs6677097	1	175123897	C	G	0.3192	2.237e-05	-4.24	0.911823	rs1057305	3	KIAA0040	2225	intergenic	0.819	1f	5	14
1:175124789:C:T	rs7512413	1	175124789	T	C	0.326	8.22e-05	-3.938	0.947786	rs1057305	3	KIAA0040	1333	intergenic	3.123	5	5	14
1:175125036:C:T	rs6425323	1	175125036	T	C	0.326	7.707e-05	-3.953	0.947786	rs1057305	3	KIAA0040	1086	intergenic	0.099	7	5	5
1:175125264:A:G	rs6681020	1	175125264	A	G	0.326	7.707e-05	-3.953	0.947786	rs1057305	3	KIAA0040	858	downstream	3.951	5	5	5
1:175125378:A:C	rs6659824	1	175125378	A	C	0.326	7.707e-05	-3.953	0.947786	rs1057305	3	KIAA0040	744	downstream	0.009	5	5	5
1:175125440:A:G	rs6683533	1	175125440	A	G	0.326	7.707e-05	-3.953	0.947786	rs1057305	3	KIAA0040	682	downstream	3.148	5	5	5
1:175126223:A:T	rs1057305	1	175126223	A	T	0.323	4.077e-06	-4.607	1	rs1057305	3	KIAA0040	0	UTR3	5.474	5	5	5
1:175126423:A:G	rs1057302	1	175126423	G	A	0.2542	0.0003177	-3.6	0.68984	rs1057305	3	KIAA0040	0	UTR3	2.658	NA	1	5
1:210924696:C:T	rs116310770	1	210924696	T	C	0.09228	0.002257	-3.054	0.616644	rs79936010	4	KCNH1	0	intronic	0.935	5	5	15
1:210924698:C:G	rs115681985	1	210924698	G	C	0.09228	0.002257	-3.054	0.616644	rs79936010	4	KCNH1	0	intronic	0.171	5	5	15
1:210925043:C:T	rs113088189	1	210925043	T	C	0.09153	0.002257	-3.054	0.610577	rs79936010	4	KCNH1	0	intronic	5.501	7	5	15
1:210927258:A:T	rs113320275	1	210927258	A	T	0.09002	0.002431	-3.032	0.609432	rs79936010	4	KCNH1	0	intronic	0.749	6	5	15
1:210929484:C:T	rs111297000	1	210929484	T	C	0.09153	0.0003704	-3.56	0.712902	rs79936010	4	KCNH1	0	intronic	1.398	5	5	15
1:210930198:G:T	rs61061348	1	210930198	G	T	0.08548	0.0005958	-3.434	0.648582	rs79936010	4	KCNH1	0	intronic	10.23	6	5	15
1:210931925:A:G	rs111563365	1	210931925	A	G	0.08396	0.0006845	-3.396	0.64963	rs79936010	4	KCNH1	0	intronic	9.122	5	5	15
1:210935286:A:G	rs60130015	1	210935286	G	A	0.08472	0.0006845	-3.396	0.655699	rs79936010	4	KCNH1	0	intronic	6.087	7	5	15
1:210940415:A:G	rs57144255	1	210940415	G	A	0.1059	0.001573	-3.161	0.782217	rs79936010	4	KCNH1	0	intronic	5.808	6	5	15
1:210941597:G:T	rs77593758	1	210941597	G	T	0.1203	0.00147	-3.181	0.714454	rs79936010	4	KCNH1	0	intronic	4.949	7	5	15
1:210941894:A:T	rs76744842	1	210941894	A	T	0.08245	0.0003244	-3.595	0.691451	rs79936010	4	KCNH1	0	intronic	6.401	7	5	15
1:210942798:C:T	rs59843981	1	210942798	C	T	0.121	0.001249	-3.227	0.720966	rs79936010	4	KCNH1	0	intronic	NA	7	5	15
1:210947488:C:G	rs12562303	1	210947488	G	C	0.121	0.0009146	-3.316	0.720966	rs79936010	4	KCNH1	0	intronic	1.802	7	4	15
1:210952451:A:G	rs59441822	1	210952451	A	G	0.1097	0.00124	-3.23	0.817538	rs79936010	4	KCNH1	0	intronic	13.33	7	5	15
1:210968576:C:T	rs56849437	1	210968576	C	T	0.1036	3.743e-05	-4.123	0.911551	rs79936010	4	KCNH1	0	intronic	1.93	7	5	15
1:210976504:A:G	rs112334626	1	210976504	A	G	0.112	8.554e-06	-4.451	0.986382	rs79936010	4	KCNH1	0	intronic	1.884	6	4	15
1:210977179:C:G	rs79936010	1	210977179	G	C	0.112	8.554e-06	-4.451	1	rs79936010	4	KCNH1	0	intronic	5.448	7	4	15
1:210983123:C:T	rs73069566	1	210983123	T	C	0.1377	0.003967	-2.881	0.703649	rs79936010	4	KCNH1	0	intronic	0.014	5	5	15
1:210985855:C:T	rs78170084	1	210985855	T	C	0.1634	0.003421	-2.927	0.609093	rs79936010	4	KCNH1	0	intronic	1.296	7	5	15
1:210989650:C:T	rs74526850	1	210989650	T	C	0.08245	0.0008713	-3.329	0.612301	rs79936010	4	KCNH1	0	intronic	19.24	5	5	15
2:38310007:G:T	rs148751085	2	38310007	T	G	0.2118	6.268e-06	4.517	1	rs148751085	5	CYP1B1:CYP1B1-AS1	00:00:00	ncRNA_intronic	0.319	5	1	14
2:38310986:C:T	rs187829394	2	38310986	C	T	0.2171	8.053e-06	4.464	1	rs187829394	5	CYP1B1:CYP1B1-AS1	00:00:00	ncRNA_intronic	2.688	6	1	14
2:69084017:A:G	rs11126201	2	69084017	A	G	0.4758	2.389e-06	-4.717	1	rs11126201	6	BMP10	8595	intergenic	0.865	6	5	15
2:69094921:C:G	rs2312077	2	69094921	C	G	0.4826	7.619e-05	-3.956	0.807454	rs11126201	6	BMP10	0	intronic	0.268	6	1	15
2:69095152:A:G	rs2312078	2	69095152	A	G	0.4932	1.539e-05	-4.323	0.845232	rs11126201	6	BMP10	0	intronic	2.859	6	1	15
2:69100735:A:G	rs12616397	2	69100735	A	G	0.4834	0.0001318	-3.823	0.745275	rs11126201	6	BMP10	2085	intergenic	1.282	5	5	15
2:78134360:C:T	rs62163508	2	78134360	C	T	0.1815	7.541e-06	-4.478	0.990075	rs6747064	7	AC073628.1	8699	intergenic	7.666	6	9	15
2:78134368:C:T	rs62163509	2	78134368	T	C	0.1793	8.392e-06	-4.455	0.975078	rs6747064	7	AC073628.1	8691	intergenic	8.06	7	9	15
2:78139879:A:C	rs59236450	2	78139879	A	C	0.1793	2.983e-06	-4.672	0.994968	rs6747064	7	AC073628.1	3180	intergenic	9.002	7	9	15
2:78141022:C:T	rs6747064	2	78141022	T	C	0.18	2.983e-06	-4.672	1	rs6747064	7	AC073628.1	2037	intergenic	1.203	6	15	15
2:78147175:C:T	rs1405580	2	78147175	C	T	0.1732	0.000157	-3.78	0.69646	rs6747064	7	AC073628.1	2039	intergenic	2.004	6	9	15
2:78149258:A:T	rs13417484	2	78149258	T	A	0.1725	0.0003383	-3.584	0.700647	rs6747064	7	AC073628.1	4122	intergenic	0.648	6	9	15
2:78150948:C:T	rs62164723	2	78150948	C	T	0.1536	0.0003436	-3.58	0.785721	rs6747064	7	AC073628.1	5812	intergenic	1.811	7	9	15
2:78154370:C:T	rs11892993	2	78154370	C	T	0.1793	0.000344	-3.58	0.742932	rs6747064	7	AC073628.1	9234	intergenic	1.732	5	9	15
2:78158365:C:T	rs62164730	2	78158365	T	C	0.1528	0.0003711	-3.56	0.781384	rs6747064	7	AC073628.1	13229	intergenic	0.704	6	15	15
2:78159558:A:C	rs62164731	2	78159558	C	A	0.1536	0.0003436	-3.58	0.786319	rs6747064	7	AC073628.1	14422	intergenic	12.29	6	5	15
2:78161893:A:G	rs13391449	2	78161893	G	A	0.1725	0.0003646	-3.564	0.700647	rs6747064	7	AC073628.1	16757	intergenic	0.137	6	9	15
2:78164757:C:G	rs62164735	2	78164757	G	C	0.1611	0.0002589	-3.653	0.812714	rs6747064	7	AC073628.1	19621	intergenic	0.024	7	9	15
2:241139141:A:G	rs4854101	2	241139141	A	G	0.05219	3.896e-06	-4.617	1	rs4854101	8	AC124861.1	27835	intergenic	0.057	NA	5	14
3:4975451:C:T	rs17041758	3	4975451	T	C	0.2716	9.69e-06	4.424	0.916715	rs4684453	9	BHLHE40-AS1	0	ncRNA_intronic	1.612	7	5	15
3:4975624:A:T	rs17041760	3	4975624	A	T	0.2776	1.073e-05	4.402	0.958239	rs4684453	9	BHLHE40-AS1	0	ncRNA_intronic	7.005	7	5	15
3:4975879:A:T	rs4684453	3	4975879	T	A	0.2776	9.009e-06	4.44	1	rs4684453	9	BHLHE40-AS1	0	ncRNA_intronic	8.606	5	5	15
3:4976785:C:G	rs7615679	3	4976785	C	G	0.3101	0.001016	3.286	0.686301	rs4684453	9	BHLHE40-AS1	0	ncRNA_intronic	0.076	7	5	15
3:166453919:C:T	rs6809960	3	166453919	T	C	0.3245	4.946e-06	4.567	0.874316	rs7649061	10	RP11-450H5.3	14520	intergenic	4.589	6	7	15
3:166454603:A:G	rs7623355	3	166454603	G	A	0.3343	7.37e-05	3.964	0.847121	rs7649061	10	RP11-450H5.3	15204	intergenic	1.884	6	5	15
3:166455482:A:G	rs10428234	3	166455482	A	G	0.3268	5.658e-06	4.539	0.872382	rs7649061	10	RP11-450H5.3	16083	intergenic	1.194	5	5	15
3:166456227:A:G	rs73031513	3	166456227	A	G	0.2405	1.087e-05	4.399	0.7504	rs73880644	10	RP11-450H5.3	16828	intergenic	1.55	7	5	15
3:166456615:C:T	rs73031515	3	166456615	T	C	0.2405	1.087e-05	4.399	0.7504	rs73880644	10	RP11-450H5.3	17216	intergenic	2.529	6	5	15
3:166457003:C:T	rs58905691	3	166457003	T	C	0.2405	1.087e-05	4.399	0.7504	rs73880644	10	RP11-450H5.3	17604	intergenic	3.294	6	5	15
3:166457198:C:T	rs60568274	3	166457198	C	T	0.2405	9.767e-06	4.422	0.7504	rs73880644	10	RP11-450H5.3	17799	intergenic	0.867	5	5	15
3:166457671:A:C	rs7649061	3	166457671	A	C	0.2995	7.37e-08	5.382	1	rs7649061	10	RP11-450H5.3	18272	intergenic	3.805	7	5	15
3:166459187:A:G	rs10513629	3	166459187	A	G	0.3169	8.666e-06	4.448	0.889126	rs7649061	10	RP11-450H5.3	19788	intergenic	1.685	6	5	15
3:166460968:A:G	rs61640888	3	166460968	A	G	0.2436	1.604e-05	4.314	0.748059	rs73880644	10	RP11-450H5.3	21569	intergenic	0.799	7	5	15
3:166462427:G:T	rs73031524	3	166462427	G	T	0.2436	1.604e-05	4.314	0.748059	rs73880644	10	RP11-450H5.3	23028	intergenic	3.884	6	9	15
3:166464496:A:C	rs73031530	3	166464496	A	C	0.3162	2.811e-06	4.684	0.885616	rs7649061	10	RP11-450H5.3	25097	intergenic	2.628	7	5	15
3:166464720:C:G	rs73031532	3	166464720	C	G	0.2436	1.214e-05	4.375	0.748059	rs73880644	10	RP11-450H5.3	25321	intergenic	0.976	4	5	15
3:166465528:G:T	rs55796002	3	166465528	T	G	0.2436	1.214e-05	4.375	0.748059	rs73880644	10	RP11-450H5.3	26129	intergenic	0.216	4	5	15
3:166474820:G:T	rs59289839	3	166474820	T	G	0.2201	8.779e-06	4.445	0.851719	rs73880644	10	RP11-450H5.3	35421	intergenic	0.232	7	9	15
3:166509151:C:T	rs56352015	3	166509151	C	T	0.2163	8.549e-06	4.451	0.936115	rs73880644	10	CBX1P5	19645	intergenic	0.624	6	9	15
3:166509632:C:T	rs73880644	3	166509632	C	T	0.205	2.042e-06	4.749	1	rs73880644	10	CBX1P5	19164	intergenic	2.298	6	9	15
3:166527655:C:T	rs13320297	3	166527655	T	C	0.416	0.0001288	3.829	0.753101	rs7615817	10	CBX1P5	1141	intergenic	4.392	4	5	15
3:166527674:C:T	rs13324094	3	166527674	C	T	0.4168	0.0001434	3.802	0.761127	rs7615817	10	CBX1P5	1122	intergenic	0.706	3a	5	15
3:166528151:A:G	rs7615817	3	166528151	G	A	0.4062	6.445e-07	4.977	1	rs7615817	10	CBX1P5	645	upstream	4.772	6	5	15
3:166529957:A:T	rs7428595	3	166529957	T	A	0.3661	1.048e-05	4.407	0.872457	rs9862464	10	CBX1P5	601	downstream	1.002	6	9	15
3:166530633:A:G	rs9821611	3	166530633	G	A	0.3238	5.458e-05	4.035	0.752503	rs9862464	10	CBX1P5	1277	intergenic	1.765	3a	9	15
3:166533427:C:T	rs9290297	3	166533427	C	T	0.3616	1.779e-05	4.291	0.909353	rs9862464	10	CBX1P5	4071	intergenic	3.588	7	9	15
3:166533882:A:T	rs11712507	3	166533882	T	A	0.379	2.272e-06	4.728	1	rs9862464	10	CBX1P5	4526	intergenic	0.722	7	9	15
3:166533979:A:T	rs11712538	3	166533979	T	A	0.379	2.272e-06	4.728	1	rs9862464	10	CBX1P5	4623	intergenic	1.299	6	9	15
3:166535042:A:G	rs6803902	3	166535042	A	G	0.379	2.272e-06	4.728	1	rs9862464	10	CBX1P5	5686	intergenic	1.617	7	9	15
3:166536048:A:G	rs9862699	3	166536048	A	G	0.379	2.168e-06	4.737	1	rs9862464	10	CBX1P5	6692	intergenic	1.137	6	9	15
3:166536075:A:C	rs9862464	3	166536075	A	C	0.379	2.168e-06	4.737	1	rs9862464	10	CBX1P5	6719	intergenic	2.874	6	9	15
3:166537994:A:G	rs28451209	3	166537994	A	G	0.388	0.0004763	3.494	0.752704	rs9862464	10	CBX1P5	8638	intergenic	0.771	7	5	15
3:166538318:C:T	rs6772629	3	166538318	T	C	0.3903	0.0004849	3.489	0.740329	rs9862464	10	CBX1P5	8962	intergenic	0.75	6	5	15
3:166538324:C:T	rs6787835	3	166538324	C	T	0.3903	0.0005197	3.47	0.740329	rs9862464	10	CBX1P5	8968	intergenic	0.997	6	5	15
3:166538495:A:G	rs6796651	3	166538495	A	G	0.3835	0.0005099	3.475	0.734772	rs9862464	10	CBX1P5	9139	intergenic	2.34	7	5	15
3:166539040:A:C	rs6788483	3	166539040	C	A	0.3835	0.0005099	3.475	0.734772	rs9862464	10	CBX1P5	9684	intergenic	0.198	7	5	15
3:166539863:A:T	rs9827930	3	166539863	A	T	0.3835	0.0005099	3.475	0.734772	rs9862464	10	CBX1P5	10507	intergenic	1.047	7	5	15
3:166541004:C:T	rs10936504	3	166541004	T	C	0.3533	4.141e-05	4.099	0.792263	rs9862464	10	CBX1P5	11648	intergenic	0.634	7	5	15
3:166541341:C:T	rs6798317	3	166541341	C	T	0.3865	0.000447	3.511	0.635813	rs9862464	10	RP11-12K11.2	11467	intergenic	1.246	7	5	15
3:191493008:C:T	rs2643063	3	191493008	C	T	0.1067	6.838e-06	-4.499	1	rs2643063	11	Y_RNA	133794	intergenic	1.716	NA	5	15
3:191506526:C:T	rs779273	3	191506526	C	T	0.07262	6.842e-05	-3.982	0.736239	rs779272	11	Y_RNA	147312	intergenic	0.546	NA	8	15
3:191506748:A:T	rs779272	3	191506748	T	A	0.09909	3.943e-06	-4.614	1	rs779272	11	Y_RNA	147534	intergenic	0.15	5	8	15
4:93634354:A:G	rs79243722	4	93634354	G	A	0.0711	7.078e-06	-4.491	1	rs79243722	12	GRID2	0	intronic	7.214	6	5	15
4:93634921:C:T	rs146860029	4	93634921	C	T	0.07186	7.078e-06	-4.491	1	rs146860029	12	GRID2	0	intronic	0.083	7	5	15
4:99722261:A:T	rs7684429	4	99722261	A	T	0.05446	1.387e-05	-4.346	0.734335	rs6822279	13	BTF3P13	59878	intergenic	7.847	3a	2	15
4:99745705:A:C	rs6822279	4	99745705	C	A	0.05749	9.876e-06	-4.42	1	rs6822279	13	EIF4E	47129	intergenic	3.81	7	14	15
4:116574034:A:T	rs113759206	4	116574034	T	A	0.1301	4.458e-06	4.589	0.949023	rs6819524	14	RPF2P2	23170	intergenic	0.271	7	14	15
4:116593891:G:T	rs6819524	4	116593891	G	T	0.1286	3.442e-06	4.643	1	rs6819524	14	RPF2P2	43027	intergenic	5.931	7	5	15
4:116597986:A:G	rs72899683	4	116597986	G	A	0.1286	3.737e-06	4.625	1	rs6819524	14	RPF2P2	47122	intergenic	9.666	7	14	15
4:116599011:A:G	rs6840832	4	116599011	A	G	0.1679	1.333e-05	4.355	0.742959	rs6819524	14	RPF2P2	48147	intergenic	1.371	6	9	15
4:116600034:G:T	rs112636998	4	116600034	T	G	0.1286	3.979e-06	4.612	1	rs6819524	14	RPF2P2	49170	intergenic	2.906	5	9	15
4:116604144:C:T	rs112597960	4	116604144	T	C	0.1823	1.953e-05	4.27	0.660829	rs6819524	14	RPF2P2	53280	intergenic	2.144	7	9	15
4:116604452:G:T	rs116238692	4	116604452	G	T	0.1762	4.062e-05	4.104	0.676566	rs6819524	14	RPF2P2	53588	intergenic	0.018	6	9	15
4:116605864:A:G	rs2061842	4	116605864	A	G	0.1271	4.14e-06	4.604	0.948705	rs6819524	14	RPF2P2	55000	intergenic	0.204	7	14	15
4:116606013:C:T	rs6844072	4	116606013	C	T	0.1271	4.14e-06	4.604	0.948705	rs6819524	14	RPF2P2	55149	intergenic	1.242	7	14	15
4:116611097:A:G	rs4257715	4	116611097	G	A	0.1891	1.513e-05	4.327	0.604111	rs6819524	14	RPF2P2	60233	intergenic	0.718	6	9	15
4:116611663:A:G	rs113513522	4	116611663	A	G	0.149	0.004877	2.815	0.736535	rs6819524	14	RPF2P2	60799	intergenic	12.09	7	9	15
4:116613408:A:G	rs72901611	4	116613408	A	G	0.149	0.005591	2.771	0.736535	rs6819524	14	RPF2P2	62544	intergenic	2.203	6	14	15
4:116616209:A:G	rs72901619	4	116616209	G	A	0.1483	0.005135	2.798	0.730529	rs6819524	14	RPF2P2	65345	intergenic	6.676	7	14	15
4:116619843:G:T	rs6850090	4	116619843	G	T	0.1483	0.005135	2.798	0.730529	rs6819524	14	PGAM4P2	65411	intergenic	0.957	6	14	15
4:116622793:C:T	4:116622793	4	116622793	C	T	0.1483	0.005135	2.798	0.730529	rs6819524	14	PGAM4P2	62461	intergenic	0.634	NA	9	15
4:116623757:C:T	rs6851674	4	116623757	T	C	0.1483	0.005135	2.798	0.730529	rs6819524	14	PGAM4P2	61497	intergenic	8.461	7	9	15
4:116623869:A:T	rs6851725	4	116623869	T	A	0.1483	0.005135	2.798	0.730529	rs6819524	14	PGAM4P2	61385	intergenic	2.183	7	9	15
4:116628896:C:T	rs72901632	4	116628896	C	T	0.1483	0.004834	2.818	0.730529	rs6819524	14	PGAM4P2	56358	intergenic	3.094	7	9	15
4:116640891:A:T	rs72901645	4	116640891	A	T	0.149	0.005951	2.75	0.728365	rs6819524	14	PGAM4P2	44363	intergenic	10.62	5	7	15
4:116641953:C:T	rs6836282	4	116641953	C	T	0.149	0.005951	2.75	0.728365	rs6819524	14	PGAM4P2	43301	intergenic	2.396	2b	7	15
4:116642292:C:T	rs72901648	4	116642292	T	C	0.149	0.005951	2.75	0.728365	rs6819524	14	PGAM4P2	42962	intergenic	1.356	5	7	15
4:116646225:C:G	rs72901660	4	116646225	C	G	0.1619	0.00336	2.933	0.653738	rs6819524	14	PGAM4P2	39029	intergenic	0.283	6	9	15
4:116665355:A:G	rs77871582	4	116665355	G	A	0.1604	0.003226	2.945	0.665764	rs6819524	14	PGAM4P2	19899	intergenic	3.683	6	9	15
4:116673644:C:T	rs17048072	4	116673644	C	T	0.1604	0.004347	2.852	0.665764	rs6819524	14	PGAM4P2	11610	intergenic	5.789	7	1	15
4:116679693:C:T	rs75456213	4	116679693	T	C	0.1604	0.00462	2.832	0.665764	rs6819524	14	PGAM4P2	5561	intergenic	0.621	6	9	15
4:116681395:A:C	rs17048077	4	116681395	C	A	0.1483	0.0063	2.732	0.730529	rs6819524	14	PGAM4P2	3859	intergenic	3.974	5	9	15
4:116682110:C:T	rs72903820	4	116682110	C	T	0.1604	0.004347	2.852	0.665764	rs6819524	14	PGAM4P2	3144	intergenic	1.321	7	9	15
4:116683222:C:T	rs6827259	4	116683222	C	T	0.149	0.0063	2.732	0.726222	rs6819524	14	PGAM4P2	2032	intergenic	1.712	7	9	15
4:116687428:G:T	rs72903833	4	116687428	T	G	0.1604	0.004347	2.852	0.665764	rs6819524	14	PGAM4P2	1452	intergenic	0.845	7	9	15
5:76294836:C:T	rs73764616	5	76294836	T	C	0.06203	3.963e-06	4.613	1	rs73764616	15	CRHBP	17852	intergenic	0.084	7	5	15
5:107938080:C:G	rs79340769	5	107938080	G	C	0.08094	0.001082	-3.268	0.720534	rs79414964	16	RP11-120B7.1	8411	intergenic	6.854	5	14	15
5:107950880:C:T	rs79414964	5	107950880	T	C	0.05976	8.741e-06	-4.446	1	rs79414964	16	RP11-120B7.1	21211	intergenic	0.497	7	2	15
5:107952834:A:T	rs77655815	5	107952834	A	T	0.06354	4.012e-05	-4.107	0.93589	rs79414964	16	RP11-120B7.1	23165	intergenic	2.942	6	5	15
5:121876491:A:G	rs11747827	5	121876491	A	G	0.08018	0.0001546	-3.784	0.870695	rs2407218	17	CTC-210G5.1	61708	intergenic	13.94	7	5	15
5:121882871:C:T	rs9327254	5	121882871	C	T	0.1225	3.03e-05	-4.171	0.621625	rs2407218	17	CTC-210G5.1	68088	intergenic	2.914	6	14	15
5:121883343:G:T	rs10037762	5	121883343	T	G	0.07943	0.0003724	-3.559	0.879487	rs2407218	17	CTC-210G5.1	68560	intergenic	0.328	6	14	15
5:121887253:A:G	rs2045903	5	121887253	A	G	0.1188	0.0002613	-3.651	0.613678	rs2407218	17	CTC-210G5.1	72470	intergenic	1.804	NA	14	15
5:121895777:A:C	rs4438871	5	121895777	A	C	0.09834	7.208e-05	-3.969	0.77844	rs2407218	17	RP11-166A12.1	68869	intergenic	2.825	5	7	15
5:121896600:A:G	rs7727702	5	121896600	A	G	0.09228	0.001461	-3.182	0.750295	rs2407218	17	RP11-166A12.1	68046	intergenic	0.839	7	5	15
5:121908191:A:T	rs10051269	5	121908191	T	A	0.0885	4.554e-05	-4.077	0.851515	rs2407218	17	RP11-166A12.1	56455	intergenic	6.54	7	5	15
5:121909381:A:G	rs2407218	5	121909381	G	A	0.08321	5.782e-07	-4.998	1	rs2407218	17	RP11-166A12.1	55265	intergenic	6.378	6	5	15
5:140120573:C:G	rs78132156	5	140120573	C	G	0.07262	2.077e-06	-4.746	0.797289	5:140208927	18	RP11-515C16.7	8124	intergenic	0.436	3a	9	15
5:140121450:G:T	rs78348175	5	140121450	T	G	0.07262	2.077e-06	-4.746	0.797289	5:140208927	18	RP11-515C16.7	9001	intergenic	0.189	6	9	15
5:140124724:A:T	rs76336192	5	140124724	A	T	0.059	5.629e-05	-4.028	0.61442	5:140208927	18	RP11-515C16.7	12275	intergenic	7.588	5	9	15
5:140127106:C:T	rs143822143	5	140127106	T	C	0.07262	2.416e-06	-4.715	0.797289	5:140208927	18	RP11-515C16.7	14657	intergenic	8.361	7	9	15
5:140133031:C:G	rs115051266	5	140133031	G	C	0.0711	3.028e-06	-4.669	0.816395	5:140208927	18	AC005609.2	10663	intergenic	13.6	7	8	9
5:140134865:C:T	rs116649345	5	140134865	T	C	0.05673	6.88e-05	-3.98	0.643201	5:140208927	18	AC005609.2	8829	intergenic	8.14	7	8	9
5:140144922:C:T	5:140144922	5	140144922	T	C	0.05673	6.842e-05	-3.982	0.643201	5:140208927	18	AC005609.2	515	downstream	1.749	5	8	9
5:140150415:A:G	5:140150415	5	140150415	G	A	0.08321	1.692e-06	-4.787	0.970647	5:140208927	18	AC005609.2	6008	intergenic	4.794	7	8	9
5:140151570:A:G	5:140151570	5	140151570	G	A	0.05673	6.684e-05	-3.987	0.643201	5:140208927	18	AC005609.2	7163	intergenic	6.688	7	8	15
5:140208927:A:C	5:140208927	5	140208927	A	C	0.08245	4.072e-07	-5.066	1	5:140208927	18	PCDHA1:PCDHA2:PCDHA3:PCDHA4:PCDHA5:PCDHA6	0:0:0:0:0:0	exonic	4.428	5	5	9
5:140223827:A:G	5:140223827	5	140223827	A	G	0.0885	7.158e-07	-4.957	0.936955	5:140208927	18	PCDHA1:PCDHA2:PCDHA3:PCDHA4:PCDHA5:PCDHA6:PCDHA7:PCDHA8	0:0:0:0:0:0:0:0	intronic	1.245	5	5	15
5:165984684:A:G	rs2923169	5	165984684	G	A	0.07262	7.754e-05	3.952	0.796407	rs180973	19	CTB-63M22.1	175079	intergenic	0.483	NA	9	15
5:165985356:C:T	rs349606	5	165985356	T	C	0.07489	7.754e-05	3.952	0.833253	rs180973	19	CTB-63M22.1	175751	intergenic	1.943	NA	9	15
5:165988671:A:G	rs180973	5	165988671	A	G	0.0643	8.079e-06	4.463	1	rs180973	19	CTB-63M22.1	179066	intergenic	2.411	NA	5	15
5:165988785:A:G	rs239468	5	165988785	A	G	0.06808	8.079e-06	4.463	0.942404	rs180973	19	CTB-63M22.1	179180	intergenic	1.301	NA	5	15
5:165990209:C:T	rs1349362	5	165990209	C	T	0.06657	9.592e-06	4.426	0.917132	rs180973	19	CTB-63M22.1	180604	intergenic	3.408	NA	9	15
5:166010888:A:G	rs17474643	5	166010888	A	G	0.07262	2.344e-05	4.229	0.714419	rs180973	19	CTB-63M22.1	201283	intergenic	2.276	7	9	15
5:166020904:A:G	rs10516019	5	166020904	A	G	0.05749	0.0002188	3.696	0.60941	rs180973	19	CTB-63M22.1	211299	intergenic	2.836	6	7	15
5:171903310:C:T	rs10042482	5	171903310	C	T	0.1407	0.0004018	3.539	0.710171	5:171912171	20	SH3PXD2B	21782	intergenic	4.721	6	13	15
5:171912167:C:T	rs112691204	5	171912167	T	C	0.1823	4.184e-05	4.097	1	5:171912171	20	SH3PXD2B	30639	intergenic	1.667	5	1	15
5:171912171:C:T	5:171912171	5	171912171	T	C	0.1823	7.154e-06	4.489	1	5:171912171	20	SH3PXD2B	30643	intergenic	1.059	5	1	15
5:171915978:A:G	rs4867677	5	171915978	A	G	0.1664	0.0006944	3.392	0.869578	5:171912171	20	SH3PXD2B	34450	intergenic	3.648	5	5	15
5:171916696:A:G	rs11134752	5	171916696	A	G	0.1672	0.0006944	3.392	0.855205	5:171912171	20	SH3PXD2B	35168	intergenic	5.749	5	5	15
6:6899063:C:G	rs6934349	6	6899063	C	G	0.357	5.886e-06	4.53	1	rs6934349	21	RP3-429O6.1	2191	intergenic	0.292	7	5	15
6:122427846:A:C	rs1456700	6	122427846	C	A	0.1051	0.0009807	-3.296	0.843273	rs699402	22	RNU1-18P	104947	intergenic	5.871	7	7	15
6:122446543:A:G	rs2816155	6	122446543	G	A	0.1044	0.001406	-3.193	0.850199	rs699402	22	RNU1-18P	86250	intergenic	3.932	NA	14	15
6:122524353:C:T	rs2816161	6	122524353	T	C	0.1112	0.00138	-3.199	0.837579	rs699402	22	RNU1-18P	8440	intergenic	4.287	NA	5	15
6:122588540:C:T	rs699402	6	122588540	C	T	0.09758	1.242e-06	-4.849	1	rs699402	22	RNU1-18P	55582	intergenic	2.518	6	9	15
6:128853214:C:T	rs6912881	6	128853214	C	T	0.07791	0.0003694	3.561	0.605105	rs59322395	23	PTPRK	11343	intergenic	4.601	7	5	15
6:128905742:A:G	rs76515539	6	128905742	G	A	0.06354	2.147e-06	4.739	1	rs76515539	23	Y_RNA	105	downstream	1.751	7	5	15
6:128910715:C:T	rs76865199	6	128910715	C	T	0.06278	2.205e-06	4.734	1	rs76865199	23	Y_RNA	5078	intergenic	3.158	7	5	15
6:128914510:A:G	rs59322395	6	128914510	G	A	0.07867	2.14e-06	4.74	1	rs59322395	23	Y_RNA	8873	intergenic	3.158	6	5	15
6:128932961:A:C	rs7451451	6	128932961	C	A	0.07337	2.121e-05	4.252	0.747442	rs59322395	23	snoU13	1384	intergenic	2.007	7	14	15
6:128940768:A:G	rs74400866	6	128940768	A	G	0.07489	1.417e-05	4.341	0.801425	rs59322395	23	snoU13	6315	intergenic	1.566	7	14	15
6:128942566:A:G	rs115559381	6	128942566	G	A	0.0764	1.264e-05	4.366	0.784647	rs59322395	23	snoU13	8113	intergenic	7.463	6	14	15
6:128942634:A:G	rs115347975	6	128942634	A	G	0.07564	1.048e-05	4.407	0.792962	rs59322395	23	snoU13	8181	intergenic	2.922	5	9	15
6:128943383:A:G	rs79880050	6	128943383	A	G	0.07791	0.0001024	3.885	0.768443	rs59322395	23	snoU13	8930	intergenic	0.163	7	9	15
6:160982051:C:T	rs10945677	6	160982051	T	C	0.143	1.114e-05	-4.394	1	rs7450411	24	LPA	0	intronic	1.468	7	5	15
6:160985673:C:T	rs9365173	6	160985673	T	C	0.1309	1.12e-05	-4.393	0.897155	rs7450411	24	LPA	0	intronic	1.215	7	4	15
6:160989137:G:T	rs9347414	6	160989137	G	T	0.1331	1.12e-05	-4.393	0.879391	rs7450411	24	LPA	0	intronic	1.13	7	5	15
6:160990457:A:C	rs9364562	6	160990457	A	C	0.1309	1.12e-05	-4.393	0.897155	rs7450411	24	LPA	0	intronic	1.635	7	5	15
6:160995214:A:G	rs35358746	6	160995214	G	A	0.1452	1.25e-05	-4.369	0.982685	rs7450411	24	LPA	0	intronic	3.317	3a	4	15
6:160997603:A:G	rs9347418	6	160997603	G	A	0.1884	0.0388	-2.066	0.737085	rs7450411	24	LPA	0	intronic	0.888	6	4	15
6:160998148:G:T	rs3798221	6	160998148	T	G	0.143	1.363e-05	-4.35	1	rs7450411	24	LPA	0	intronic	0.564	6	4	15
6:161001713:C:T	rs62441908	6	161001713	T	C	0.143	1.028e-05	-4.411	1	rs7450411	24	LPA	0	intronic	6.92	6	4	15
6:161010354:A:C	rs7450411	6	161010354	A	C	0.143	9.515e-06	-4.428	1	rs7450411	24	LPA	0	intronic	NA	6	4	15
6:161013322:A:G	rs34600300	6	161013322	A	G	0.1899	0.0382	-2.073	0.723088	rs7450411	24	LPA	0	intronic	0.162	7	4	15
6:161015406:C:T	rs34620808	6	161015406	T	C	0.1437	1.297e-05	-4.361	0.994177	rs7450411	24	LPA	0	intronic	NA	6	4	15
7:128855457:C:T	rs2052962	7	128855457	C	T	0.2179	0.001025	-3.284	0.616342	rs4728159	25	SMO:RP11-286H14.8	2070:2070	intergenic	0.622	NA	4	5
7:128856192:C:T	rs4728159	7	128856192	C	T	0.3094	6.071e-07	-4.989	1	rs4728159	25	SMO:RP11-286H14.8	2805:2805	intergenic	4.078	5	5	15
7:128859284:C:T	rs2718111	7	128859284	C	T	0.261	0.0003389	-3.584	0.780546	rs4728159	25	AHCYL2	5579	intergenic	0.799	7	5	5
7:128859394:C:T	rs2465900	7	128859394	C	T	0.261	0.0003389	-3.584	0.780546	rs4728159	25	AHCYL2	5469	intergenic	1.778	7	5	5
7:128860798:G:T	rs28864519	7	128860798	G	T	0.2708	0.0001098	-3.868	0.751966	rs4728159	25	AHCYL2	4065	intergenic	6.089	5	5	5
7:128870325:A:G	rs2566875	7	128870325	A	G	0.2428	0.0001699	-3.76	0.610572	rs4728159	25	AHCYL2	0	intronic	12.84	7	5	15
7:128874068:A:G	rs2694583	7	128874068	A	G	0.2428	0.0001699	-3.76	0.610572	rs4728159	25	AHCYL2	0	intronic	1.651	NA	4	15
7:128879378:C:G	rs1549788	7	128879378	C	G	0.2428	0.000181	-3.744	0.604754	rs4728159	25	AHCYL2	0	intronic	NA	7	5	15
7:128882133:A:C	rs9641848	7	128882133	A	C	0.2451	0.000181	-3.744	0.600631	rs4728159	25	AHCYL2	0	intronic	2.641	5	5	15
7:128882296:C:T	rs143715559	7	128882296	T	C	0.09909	2.521e-05	-4.213	0.862761	rs190614966	25	AHCYL2	0	intronic	3.038	7	5	15
7:128884807:A:G	rs28399138	7	128884807	A	G	0.2458	5.164e-05	-4.048	0.602786	rs4728159	25	AHCYL2	0	intronic	0.621	7	4	15
7:128885026:C:T	rs6970267	7	128885026	C	T	0.2458	4.284e-05	-4.092	0.602786	rs4728159	25	AHCYL2	0	intronic	0.768	6	4	15
7:128885218:A:G	rs6950279	7	128885218	G	A	0.2458	4.284e-05	-4.092	0.602786	rs4728159	25	AHCYL2	0	intronic	0.801	7	4	15
7:128888544:C:T	rs2896414	7	128888544	C	T	0.2421	0.000181	-3.744	0.601628	rs4728159	25	AHCYL2	0	intronic	3.874	6	5	15
7:128892536:A:G	rs6950496	7	128892536	G	A	0.2451	0.000181	-3.744	0.600631	rs4728159	25	AHCYL2	0	intronic	1.09	7	5	15
7:128893752:A:G	rs1526898	7	128893752	G	A	0.2458	0.000181	-3.744	0.602786	rs4728159	25	AHCYL2	0	intronic	4.13	6	5	15
7:128902983:A:T	rs1991645	7	128902983	A	T	0.2451	0.000181	-3.744	0.600631	rs4728159	25	AHCYL2	0	intronic	3.421	6	5	15
7:128904334:A:G	rs2402946	7	128904334	A	G	0.2451	0.000256	-3.656	0.600631	rs4728159	25	AHCYL2	0	intronic	5.29	6	5	15
7:128980332:C:T	rs190614966	7	128980332	C	T	0.1029	8.19e-06	-4.46	1	rs190614966	25	AHCYL2	0	intronic	1.601	7	5	15
7:158660582:C:T	rs115650684	7	158660582	T	C	0.07867	5.77e-07	-4.999	0.95797	rs6978311	26	WDR60	0	intronic	1.796	5	4	5
7:158665920:A:G	rs6978311	7	158665920	A	G	0.08018	5.47e-07	-5.009	1	rs6978311	26	WDR60	0	intronic	1.656	6	4	5
7:158723463:A:G	rs114148828	7	158723463	A	G	0.0643	0.0001319	-3.823	0.786363	rs6978311	26	WDR60	0	intronic	4.212	7	4	5
7:158739922:A:G	rs114404520	7	158739922	A	G	0.0643	0.000127	-3.832	0.786363	rs6978311	26	WDR60	0	intronic	0.582	5	4	4
7:158743970:C:G	rs114051416	7	158743970	C	G	0.0643	3.628e-05	-4.13	0.786363	rs6978311	26	WDR60	0	intronic	0.656	4	4	8
8:9817684:A:T	rs113394492	8	9817684	T	A	0.05144	2.125e-06	-4.741	1	rs113394492	27	snoU13	28350	intergenic	7.463	6	5	14
8:52158173:A:G	rs116708274	8	52158173	A	G	0.0643	0.001229	-3.232	0.615321	rs28890775	28	RP11-401H2.1	12074	intergenic	1.065	7	9	15
8:52159125:A:G	rs78396106	8	52159125	G	A	0.06505	0.006353	-2.729	0.606869	rs28890775	28	RP11-401H2.1	11122	intergenic	1.964	7	9	15
8:52159319:A:T	rs77963873	8	52159319	A	T	0.06505	0.006353	-2.729	0.606869	rs28890775	28	RP11-401H2.1	10928	intergenic	5.643	7	9	15
8:52170699:G:T	rs77868776	8	52170699	T	G	0.06505	0.008167	-2.645	0.606869	rs28890775	28	RP11-401H2.1	0	ncRNA_intronic	0.125	6	9	15
8:52177365:C:T	rs79581697	8	52177365	C	T	0.06505	0.008167	-2.645	0.606869	rs28890775	28	RP11-401H2.1	0	ncRNA_intronic	1.4	7	9	15
8:52180154:C:G	rs77549246	8	52180154	G	C	0.06505	0.002605	-3.011	0.606869	rs28890775	28	RP11-401H2.1	0	ncRNA_intronic	0.071	5	9	15
8:52187739:C:G	rs79396695	8	52187739	C	G	0.06505	0.0004986	-3.481	0.606869	rs28890775	28	RP11-401H2.1	0	ncRNA_intronic	0.134	4	5	15
8:52207622:C:T	rs28890775	8	52207622	T	C	0.05068	3.561e-07	-5.091	1	rs28890775	28	RP11-401H2.1	0	ncRNA_intronic	0.162	7	9	15
8:88309814:A:G	rs6992170	8	88309814	A	G	0.3472	5.849e-05	-4.019	0.766049	rs13248225	29	CNBD1	0	intronic	2.128	7	9	15
8:88310019:A:G	rs6996227	8	88310019	A	G	0.2852	2.204e-06	-4.734	1	rs13248225	29	CNBD1	0	intronic	1.166	7	9	15
8:88310176:C:T	rs13248587	8	88310176	T	C	0.2852	2.204e-06	-4.734	1	rs13248225	29	CNBD1	0	intronic	0.568	7	9	15
8:88310577:G:T	rs4639532	8	88310577	G	T	0.2874	2.204e-06	-4.734	0.989542	rs13248225	29	CNBD1	0	intronic	2.697	7	9	15
8:88310648:C:G	rs13250066	8	88310648	G	C	0.2852	2.204e-06	-4.734	1	rs13248225	29	CNBD1	0	intronic	0.127	7	9	15
8:88310693:A:G	rs13248225	8	88310693	A	G	0.2852	2.204e-06	-4.734	1	rs13248225	29	CNBD1	0	intronic	0.922	7	9	15
8:88310816:C:G	8:88310816	8	88310816	G	C	0.3457	3.024e-06	-4.669	0.768891	rs13248225	29	CNBD1	0	intronic	1.759	6	9	15
8:88311222:C:T	rs10107746	8	88311222	C	T	0.3464	3.818e-06	-4.621	0.765472	rs13248225	29	CNBD1	0	intronic	3.464	7	9	15
8:88311545:C:T	rs28568431	8	88311545	T	C	0.3631	3.976e-05	-4.109	0.716418	rs13248225	29	CNBD1	0	intronic	3.086	7	9	15
8:88312116:C:T	rs7833289	8	88312116	C	T	0.3464	3.818e-06	-4.621	0.765472	rs13248225	29	CNBD1	0	intronic	0.177	7	9	15
8:88312559:A:G	rs13250073	8	88312559	A	G	0.3464	3.818e-06	-4.621	0.765472	rs13248225	29	CNBD1	0	intronic	0.168	7	9	15
8:88313087:C:T	rs10094598	8	88313087	C	T	0.3464	3.818e-06	-4.621	0.765472	rs13248225	29	CNBD1	0	intronic	0.882	6	9	15
8:88313520:C:T	rs10095078	8	88313520	C	T	0.3464	3.818e-06	-4.621	0.765472	rs13248225	29	CNBD1	0	intronic	0.912	6	9	15
8:88313610:A:G	rs13263432	8	88313610	G	A	0.3464	3.818e-06	-4.621	0.765472	rs13248225	29	CNBD1	0	intronic	0.824	7	9	15
8:88314127:A:T	rs28804163	8	88314127	T	A	0.3457	3.818e-06	-4.621	0.767893	rs13248225	29	CNBD1	0	intronic	0.272	6	14	15
8:88316027:C:T	rs547683637	8	88316027	C	T	0.3487	3.574e-06	-4.635	0.759274	rs13248225	29	CNBD1	0	intronic	1.121	NA	14	15
8:88316378:A:G	rs28766910	8	88316378	A	G	0.3449	3.48e-06	-4.64	0.76443	rs13248225	29	CNBD1	0	intronic	3.29	7	14	15
8:88316794:A:G	rs7815598	8	88316794	G	A	0.3457	3.818e-06	-4.621	0.767893	rs13248225	29	CNBD1	0	intronic	9.17	6	14	15
8:88316974:A:T	rs7819277	8	88316974	T	A	0.3623	3.976e-05	-4.109	0.718628	rs13248225	29	CNBD1	0	intronic	6.163	7	9	15
8:88317134:A:T	rs7823091	8	88317134	A	T	0.3457	3.818e-06	-4.621	0.767893	rs13248225	29	CNBD1	0	intronic	6.62	6	9	15
8:88318568:G:T	rs7828718	8	88318568	G	T	0.3994	0.0001273	-3.832	0.618384	rs13248225	29	CNBD1	0	intronic	3.052	5	9	15
8:88318667:C:T	rs13250425	8	88318667	C	T	0.1097	2.996e-06	-4.671	0.918965	rs4961035	29	CNBD1	0	intronic	0.178	5	9	15
8:88318918:C:T	rs10100662	8	88318918	T	C	0.3464	3.818e-06	-4.621	0.765472	rs13248225	29	CNBD1	0	intronic	1.84	7	9	15
8:88319134:C:T	rs10100909	8	88319134	T	C	0.07413	4.902e-05	-4.06	0.842621	rs3922614	29	CNBD1	0	intronic	0.375	6	9	15
8:88319236:A:G	rs10087343	8	88319236	G	A	0.3464	3.818e-06	-4.621	0.765472	rs13248225	29	CNBD1	0	intronic	7.728	6	9	15
8:88319864:G:T	rs2336992	8	88319864	T	G	0.413	0.0007783	3.36	0.719811	rs67620422	29	CNBD1	0	intronic	0.584	7	9	15
8:88320023:A:C	rs2336993	8	88320023	A	C	0.413	0.0007783	3.36	0.719811	rs67620422	29	CNBD1	0	intronic	5.855	7	9	15
8:88320518:A:G	rs59738681	8	88320518	G	A	0.413	0.0007783	3.36	0.719811	rs67620422	29	CNBD1	0	intronic	1.239	7	9	15
8:88321459:A:G	rs12547621	8	88321459	G	A	0.416	0.0008287	3.343	0.73269	rs67620422	29	CNBD1	0	intronic	1.922	7	9	15
8:88321805:A:G	rs10108793	8	88321805	A	G	0.3464	4.378e-06	-4.593	0.765472	rs13248225	29	CNBD1	0	intronic	0.765	7	9	15
8:88322114:G:T	rs10109215	8	88322114	G	T	0.3631	4.51e-05	-4.08	0.716418	rs13248225	29	CNBD1	0	intronic	3.229	6	9	15
8:88322223:A:G	rs10106392	8	88322223	G	A	0.3464	4.407e-06	-4.591	0.765472	rs13248225	29	CNBD1	0	intronic	1.561	6	9	15
8:88323344:G:T	rs13281574	8	88323344	G	T	0.3464	3.818e-06	-4.621	0.765472	rs13248225	29	CNBD1	0	intronic	3.559	7	1	15
8:88323674:C:T	rs13282511	8	88323674	C	T	0.3464	4.407e-06	-4.591	0.765472	rs13248225	29	CNBD1	0	intronic	2.862	6	9	15
8:88323718:A:G	rs13275404	8	88323718	G	A	0.0711	1.98e-05	-4.267	0.904258	rs3922614	29	CNBD1	0	intronic	0.742	6	9	15
8:88323726:C:T	rs13282779	8	88323726	C	T	0.3472	4.407e-06	-4.591	0.76306	rs13248225	29	CNBD1	0	intronic	0.367	6	9	15
8:88324121:C:T	rs10089048	8	88324121	C	T	0.3517	6.752e-06	-4.501	0.751878	rs13248225	29	CNBD1	0	intronic	2.943	7	9	15
8:88324192:A:G	rs10098949	8	88324192	A	G	0.3487	4.126e-06	-4.605	0.759274	rs13248225	29	CNBD1	0	intronic	1.666	6	9	15
8:88324194:A:G	rs10098950	8	88324194	A	G	0.3623	4.605e-05	-4.075	0.718628	rs13248225	29	CNBD1	0	intronic	1.514	6	9	15
8:88324307:A:G	rs10086296	8	88324307	G	A	0.3623	4.51e-05	-4.08	0.718628	rs13248225	29	CNBD1	0	intronic	0.49	6	9	15
8:88324400:C:G	rs10099177	8	88324400	C	G	0.3457	4.407e-06	-4.591	0.767893	rs13248225	29	CNBD1	0	intronic	1.57	6	9	15
8:88324510:A:T	rs10086526	8	88324510	T	A	0.1104	3.548e-06	-4.636	0.926389	rs4961035	29	CNBD1	0	intronic	2.366	5	9	15
8:88324519:A:T	rs10089547	8	88324519	A	T	0.3623	4.51e-05	-4.08	0.718628	rs13248225	29	CNBD1	0	intronic	3.596	5	9	15
8:88326749:A:C	rs10108387	8	88326749	A	C	0.3449	3.82e-06	-4.621	0.76443	rs13248225	29	CNBD1	0	intronic	3.221	7	9	15
8:88327180:A:G	rs10098053	8	88327180	G	A	0.3449	4.124e-06	-4.605	0.76443	rs13248225	29	CNBD1	0	intronic	0.531	6	9	15
8:88327851:A:G	rs6993978	8	88327851	A	G	0.3616	4.462e-05	-4.082	0.715189	rs13248225	29	CNBD1	0	intronic	1.706	6	9	15
8:88327867:A:C	rs6995133	8	88327867	A	C	0.3449	4.859e-06	-4.571	0.76443	rs13248225	29	CNBD1	0	intronic	4.705	7	9	15
8:88328054:A:G	rs6980807	8	88328054	G	A	0.3457	3.818e-06	-4.621	0.762006	rs13248225	29	CNBD1	0	intronic	0.691	6	9	15
8:88328439:C:T	rs6985516	8	88328439	C	T	0.3464	4.555e-06	-4.584	0.765472	rs13248225	29	CNBD1	0	intronic	1.888	6	9	15
8:88328500:C:G	8:88328500	8	88328500	G	C	0.3464	4.349e-06	-4.594	0.765472	rs13248225	29	CNBD1	0	intronic	0.179	7	9	15
8:88329420:A:G	rs67879567	8	88329420	A	G	0.3714	8.412e-05	3.932	0.881877	rs67620422	29	CNBD1	0	intronic	7.323	6	9	15
8:88329683:C:T	rs10092073	8	88329683	T	C	0.3495	3.961e-06	-4.613	0.752088	rs13248225	29	CNBD1	0	intronic	5.216	7	9	15
8:88329800:A:G	rs10091462	8	88329800	A	G	0.3623	4.408e-05	-4.085	0.712976	rs13248225	29	CNBD1	0	intronic	3.212	6	9	15
8:88330433:C:T	rs4960937	8	88330433	C	T	0.3457	4.296e-06	-4.597	0.762006	rs13248225	29	CNBD1	0	intronic	2.223	6	9	15
8:88331067:A:T	rs13282381	8	88331067	T	A	0.3457	4.296e-06	-4.597	0.762006	rs13248225	29	CNBD1	0	intronic	0.549	6	9	15
8:88331118:C:T	rs13255099	8	88331118	C	T	0.3457	4.296e-06	-4.597	0.762006	rs13248225	29	CNBD1	0	intronic	1.492	7	9	15
8:88331478:C:G	rs13280420	8	88331478	C	G	0.06959	5.342e-05	-4.04	0.922353	rs3922614	29	CNBD1	0	intronic	1.116	6	9	15
8:88332130:C:T	rs10110391	8	88332130	T	C	0.3449	4.296e-06	-4.597	0.76443	rs13248225	29	CNBD1	0	intronic	2.778	6	9	15
8:88332172:A:G	rs10109580	8	88332172	A	G	0.3449	4.296e-06	-4.597	0.76443	rs13248225	29	CNBD1	0	intronic	0.056	7	9	15
8:88332521:C:G	rs13275422	8	88332521	G	C	0.06884	5.342e-05	-4.04	0.910274	rs3922614	29	CNBD1	0	intronic	2.425	6	9	15
8:88332734:A:C	rs6993369	8	88332734	A	C	0.3449	4.527e-06	-4.586	0.76443	rs13248225	29	CNBD1	0	intronic	4.487	7	9	15
8:88332858:C:T	rs7824234	8	88332858	T	C	0.3449	5.251e-06	-4.555	0.76443	rs13248225	29	CNBD1	0	intronic	4.42	6	9	15
8:88333012:A:T	8:88333012	8	88333012	T	A	0.1089	1.142e-05	-4.388	0.926023	rs4961035	29	CNBD1	0	intronic	1.786	7	9	15
8:88333882:A:G	rs13252255	8	88333882	G	A	0.3449	5.251e-06	-4.555	0.76443	rs13248225	29	CNBD1	0	intronic	3.37	6	9	15
8:88334001:A:G	rs13259727	8	88334001	G	A	0.3457	5.039e-06	-4.563	0.767893	rs13248225	29	CNBD1	0	intronic	3.614	7	15	15
8:88339652:A:G	rs13272906	8	88339652	A	G	0.1097	1.989e-05	-4.266	0.933447	rs4961035	29	CNBD1	0	intronic	3.004	5	1	15
8:88339666:A:G	rs13272917	8	88339666	A	G	0.1097	1.989e-05	-4.266	0.933447	rs4961035	29	CNBD1	0	intronic	3.216	5	1	15
8:88339741:A:G	rs144619716	8	88339741	A	G	0.3464	5.039e-06	-4.563	0.75959	rs13248225	29	CNBD1	0	intronic	4.592	7	1	15
8:88339764:C:T	rs13275326	8	88339764	T	C	0.348	5.039e-06	-4.563	0.760657	rs13248225	29	CNBD1	0	intronic	NA	7	1	15
8:88339999:C:G	rs10113842	8	88339999	G	C	0.3464	5.039e-06	-4.563	0.765472	rs13248225	29	CNBD1	0	intronic	3.063	7	1	15
8:88340021:A:G	8:88340021	8	88340021	A	G	0.3623	5.071e-05	-4.052	0.718628	rs13248225	29	CNBD1	0	intronic	3.379	6	9	15
8:88340865:A:G	rs10101400	8	88340865	G	A	0.3464	5.52e-06	-4.544	0.765472	rs13248225	29	CNBD1	0	intronic	2.095	6	9	15
8:88340896:G:T	rs10107283	8	88340896	G	T	0.3464	5.039e-06	-4.563	0.765472	rs13248225	29	CNBD1	0	intronic	3.978	7	9	15
8:88341350:G:T	8:88341350	8	88341350	G	T	0.3464	3.818e-06	-4.621	0.765472	rs13248225	29	CNBD1	0	intronic	2.167	7	9	15
8:88341420:C:T	rs2336996	8	88341420	T	C	0.3737	8.789e-05	3.922	0.890069	rs67620422	29	CNBD1	0	intronic	5.68	6	9	15
8:88342601:C:T	rs1578907	8	88342601	C	T	0.3623	3.976e-05	-4.109	0.718628	rs13248225	29	CNBD1	0	intronic	1.323	6	9	15
8:88343019:G:T	rs4960938	8	88343019	G	T	0.3464	3.818e-06	-4.621	0.765472	rs13248225	29	CNBD1	0	intronic	0.027	7	9	15
8:88343666:A:G	rs10104872	8	88343666	A	G	0.3464	3.818e-06	-4.621	0.765472	rs13248225	29	CNBD1	0	intronic	3.541	7	9	15
8:88344210:C:T	rs4961029	8	88344210	C	T	0.3464	3.818e-06	-4.621	0.765472	rs13248225	29	CNBD1	0	intronic	9.374	6	9	15
8:88344412:C:T	rs34239326	8	88344412	C	T	0.3464	3.818e-06	-4.621	0.765472	rs13248225	29	CNBD1	0	intronic	1.143	7	9	15
8:88344703:A:G	rs7840020	8	88344703	G	A	0.4002	5.48e-05	4.034	0.99352	rs67620422	29	CNBD1	0	intronic	8.456	7	9	15
8:88344739:C:G	rs6468771	8	88344739	C	G	0.1097	9.775e-06	-4.422	0.933447	rs4961035	29	CNBD1	0	intronic	0.205	7	9	15
8:88344898:C:T	rs6468772	8	88344898	T	C	0.1112	9.775e-06	-4.422	0.919416	rs4961035	29	CNBD1	0	intronic	0.594	7	9	15
8:88345100:A:G	rs2336956	8	88345100	G	A	0.3994	5.48e-05	4.034	0.990275	rs67620422	29	CNBD1	0	intronic	1.768	7	9	15
8:88345118:A:T	rs7813217	8	88345118	A	T	0.1104	9.775e-06	-4.422	0.926389	rs4961035	29	CNBD1	0	intronic	6.811	6	9	15
8:88345173:A:C	rs7844017	8	88345173	C	A	0.3472	3.818e-06	-4.621	0.76306	rs13248225	29	CNBD1	0	intronic	0.068	6	9	15
8:88345929:A:T	rs7814145	8	88345929	T	A	0.4002	5.48e-05	4.034	0.99352	rs67620422	29	CNBD1	0	intronic	4.002	7	9	15
8:88346729:C:T	rs7002305	8	88346729	T	C	0.1051	1.602e-05	-4.314	0.873108	rs4961035	29	CNBD1	0	intronic	1.435	7	9	15
8:88346979:A:G	rs7005179	8	88346979	A	G	0.3472	4.027e-06	-4.61	0.76306	rs13248225	29	CNBD1	0	intronic	0.045	7	9	15
8:88347899:C:G	rs10095774	8	88347899	C	G	0.3464	3.818e-06	-4.621	0.765472	rs13248225	29	CNBD1	0	intronic	2.929	7	9	15
8:88349312:A:G	rs10100168	8	88349312	A	G	0.1097	9.775e-06	-4.422	0.933447	rs4961035	29	CNBD1	0	intronic	1.299	6	9	15
8:88349345:C:T	rs66998906	8	88349345	T	C	0.3737	8.789e-05	3.922	0.890069	rs67620422	29	CNBD1	0	intronic	2.525	7	9	15
8:88349403:C:T	rs10101149	8	88349403	T	C	0.1097	9.775e-06	-4.422	0.933447	rs4961035	29	CNBD1	0	intronic	3.122	7	9	15
8:88349452:C:G	rs10101169	8	88349452	G	C	0.06959	5.342e-05	-4.04	0.922353	rs3922614	29	CNBD1	0	intronic	3.713	7	9	15
8:88349521:G:T	rs66848476	8	88349521	G	T	0.3729	8.789e-05	3.922	0.887459	rs67620422	29	CNBD1	0	intronic	7.872	5	9	15
8:88350236:C:T	rs7837818	8	88350236	C	T	0.3464	3.818e-06	-4.621	0.765472	rs13248225	29	CNBD1	0	intronic	3.145	6	9	15
8:88351601:A:G	rs13269156	8	88351601	A	G	0.08775	0.003793	-2.895	0.699954	rs3922614	29	CNBD1	0	intronic	0.168	7	9	15
8:88355224:C:T	rs9297305	8	88355224	T	C	0.06959	4.119e-05	-4.101	0.922353	rs3922614	29	CNBD1	0	intronic	NA	4	8	15
8:88355879:A:G	rs10282857	8	88355879	G	A	0.1082	9.775e-06	-4.422	0.947823	rs4961035	29	CNBD1	0	intronic	4.168	7	5	15
8:88356177:C:T	rs11994411	8	88356177	C	T	0.06808	5.342e-05	-4.04	0.943466	rs3922614	29	CNBD1	0	intronic	2.262	6	5	15
8:88361114:G:T	rs10098438	8	88361114	T	G	0.1082	1.081e-05	-4.4	0.947823	rs4961035	29	CNBD1	0	intronic	1.507	7	9	15
8:88361666:C:T	rs10089265	8	88361666	C	T	0.4372	3.639e-05	-4.129	0.640293	rs28841989	29	CNBD1	0	intronic	NA	6	9	15
8:88361794:A:G	rs10086478	8	88361794	G	A	0.4372	3.639e-05	-4.129	0.640293	rs28841989	29	CNBD1	0	intronic	1.145	7	9	15
8:88361818:G:T	rs10089493	8	88361818	G	T	0.4372	3.639e-05	-4.129	0.640293	rs28841989	29	CNBD1	0	intronic	0.156	7	9	15
8:88361888:A:C	rs72668626	8	88361888	A	C	0.3752	8.773e-05	3.922	0.895344	rs67620422	29	CNBD1	0	intronic	3.424	7	9	15
8:88361895:A:G	rs10109222	8	88361895	A	G	0.1082	1.081e-05	-4.4	0.947823	rs4961035	29	CNBD1	0	intronic	1.409	7	9	15
8:88362414:A:G	rs10097102	8	88362414	G	A	0.4372	3.639e-05	-4.129	0.640293	rs28841989	29	CNBD1	0	intronic	1.484	6	9	15
8:88362509:A:G	rs10097225	8	88362509	G	A	0.1082	1.081e-05	-4.4	0.947823	rs4961035	29	CNBD1	0	intronic	1.223	6	9	15
8:88362923:A:G	rs13249174	8	88362923	G	A	0.1082	9.863e-06	-4.42	0.947823	rs4961035	29	CNBD1	0	intronic	2.25	7	9	15
8:88364148:G:T	rs28629293	8	88364148	T	G	0.1082	9.863e-06	-4.42	0.947823	rs4961035	29	CNBD1	0	intronic	0.352	6	9	15
8:88366337:A:G	rs13277033	8	88366337	A	G	0.1082	8.167e-06	-4.461	0.947823	rs4961035	29	CNBD1	0	intronic	3.173	7	9	15
8:88366651:C:T	rs7830365	8	88366651	C	T	0.06884	5.371e-05	-4.039	0.932805	rs3922614	29	CNBD1	0	intronic	1.337	5	9	15
8:88367222:A:G	rs7830912	8	88367222	G	A	0.4372	3.211e-05	-4.158	0.640293	rs28841989	29	CNBD1	0	intronic	3.787	6	9	15
8:88368124:A:G	rs10955265	8	88368124	G	A	0.3759	8.773e-05	3.922	0.891862	rs67620422	29	CNBD1	0	intronic	0.445	7	9	15
8:88368506:A:G	rs7836295	8	88368506	G	A	0.1082	8.167e-06	-4.461	0.947823	rs4961035	29	CNBD1	0	intronic	2.697	7	9	15
8:88368925:A:G	rs55878626	8	88368925	A	G	0.3752	8.773e-05	3.922	0.895344	rs67620422	29	CNBD1	0	intronic	1.925	7	9	15
8:88371229:A:G	rs67620422	8	88371229	G	A	0.4017	8.511e-06	4.452	1	rs67620422	29	CNBD1	0	intronic	0.964	6	9	15
8:88375163:A:G	rs60287573	8	88375163	A	G	0.4675	5.943e-05	4.015	0.753093	rs67620422	29	CNBD1	0	intronic	0.855	7	9	15
8:88376921:A:G	rs10106994	8	88376921	G	A	0.4107	5.927e-06	-4.529	0.711644	rs28841989	29	CNBD1	0	intronic	0.436	7	9	15
8:88377224:C:T	rs11990638	8	88377224	C	T	0.4092	5.927e-06	-4.529	0.715408	rs28841989	29	CNBD1	0	intronic	1.245	7	9	15
8:88377549:C:T	rs7823414	8	88377549	C	T	0.4017	3.151e-05	4.162	1	rs67620422	29	CNBD1	0	intronic	1.427	7	9	15
8:88377699:A:G	rs10283270	8	88377699	G	A	0.4107	5.927e-06	-4.529	0.711644	rs28841989	29	CNBD1	0	intronic	1.758	5	9	15
8:88378500:A:G	rs67842235	8	88378500	A	G	0.4017	3.151e-05	4.162	1	rs67620422	29	CNBD1	0	intronic	0.634	3a	2	15
8:88379205:A:G	rs10504830	8	88379205	G	A	0.4024	5.48e-05	4.034	0.996757	rs67620422	29	CNBD1	0	intronic	4.147	6	5	15
8:88379475:C:G	rs7017661	8	88379475	G	C	0.413	0.0001485	3.794	0.955255	rs67620422	29	CNBD1	0	intronic	3.936	7	5	15
8:88381508:C:T	rs1316771	8	88381508	T	C	0.4024	5.48e-05	4.034	0.996757	rs67620422	29	CNBD1	0	intronic	13.96	6	5	15
8:88382045:A:C	rs71504322	8	88382045	A	C	0.1074	9.863e-06	-4.42	0.955145	rs4961035	29	CNBD1	0	intronic	4.467	6	5	15
8:88383745:A:G	rs10091075	8	88383745	G	A	0.4092	6.353e-06	-4.514	0.716442	rs28841989	29	CNBD1	0	intronic	0.189	7	5	15
8:88385077:A:C	rs7824912	8	88385077	A	C	0.4017	5.48e-05	4.034	0.993516	rs67620422	29	CNBD1	0	intronic	2.765	6	5	15
8:88385793:A:T	rs2337042	8	88385793	A	T	0.4092	6.353e-06	-4.514	0.716442	rs28841989	29	CNBD1	0	intronic	6.003	7	5	15
8:88386459:A:C	rs6981957	8	88386459	C	A	0.1074	9.863e-06	-4.42	0.955145	rs4961035	29	CNBD1	0	intronic	1.937	7	5	15
8:88387723:A:G	rs56831023	8	88387723	G	A	0.4024	5.666e-05	4.026	0.996757	rs67620422	29	CNBD1	0	intronic	2.362	7	5	15
8:88388065:C:T	rs67452998	8	88388065	C	T	0.4024	5.666e-05	4.026	0.996757	rs67620422	29	CNBD1	0	intronic	NA	6	5	15
8:88389204:C:T	rs13256194	8	88389204	C	T	0.1074	9.698e-06	-4.424	0.955145	rs4961035	29	CNBD1	0	intronic	1.161	7	5	15
8:88391237:A:C	rs13268575	8	88391237	C	A	0.1732	2.769e-07	-5.139	1	rs13268575	29	CNBD1	0	intronic	0.236	7	5	15
8:88392706:C:G	rs13259432	8	88392706	C	G	0.4092	4.174e-06	-4.603	0.716442	rs28841989	29	CNBD1	0	intronic	0.076	6	9	15
8:88394468:C:T	rs13280376	8	88394468	T	C	0.06732	5.929e-05	-4.016	0.954343	rs3922614	29	CNBD1	0	intronic	0.793	7	9	15
8:88396054:A:G	rs13265042	8	88396054	G	A	0.4092	7.731e-06	-4.473	0.716442	rs28841989	29	CNBD1	0	intronic	1.549	7	9	15
8:88396953:A:G	rs11786454	8	88396953	A	G	0.05749	1.369e-05	-4.349	0.89183	rs3922614	29	CNBD1	0	intronic	4.814	7	9	15
8:88397882:C:G	8:88397882	8	88397882	C	G	0.1074	9.698e-06	-4.424	0.955145	rs4961035	29	CNBD1	0	intronic	1.138	5	9	15
8:88398264:A:G	rs10100994	8	88398264	G	A	0.06732	5.24e-05	-4.045	0.954343	rs3922614	29	CNBD1	0	intronic	9.343	7	9	15
8:88398670:A:G	rs7827859	8	88398670	A	G	0.4092	3.578e-06	-4.635	0.716442	rs28841989	29	CNBD1	0	intronic	1.415	7	9	15
8:88399427:A:G	rs60991729	8	88399427	G	A	0.4039	5.666e-05	4.026	0.990389	rs67620422	29	CNBD1	0	intronic	7.112	6	9	15
8:88400746:C:T	rs112520756	8	88400746	T	C	0.4032	5.666e-05	4.026	0.993553	rs67620422	29	CNBD1	0	intronic	2.405	7	15	15
8:88401548:G:T	rs7000341	8	88401548	G	T	0.4032	5.666e-05	4.026	0.993553	rs67620422	29	CNBD1	0	intronic	8.298	7	15	15
8:88401572:A:T	rs13281007	8	88401572	T	A	0.1074	9.698e-06	-4.424	0.955145	rs4961035	29	CNBD1	0	intronic	2.236	7	15	15
8:88401583:G:T	rs13277952	8	88401583	T	G	0.4092	3.578e-06	-4.635	0.716442	rs28841989	29	CNBD1	0	intronic	0.457	7	15	15
8:88402262:A:T	rs184121830	8	88402262	T	A	0.4032	3.578e-06	-4.635	0.688892	rs28841989	29	CNBD1	0	intronic	NA	7	15	15
8:88402578:A:C	8:88402578	8	88402578	A	C	0.4032	5.666e-05	4.026	0.993553	rs67620422	29	CNBD1	0	intronic	5.092	7	15	15
8:88403517:C:T	rs13255866	8	88403517	C	T	0.4092	3.578e-06	-4.635	0.716442	rs28841989	29	CNBD1	0	intronic	1.774	7	9	15
8:88403530:A:C	rs13282334	8	88403530	A	C	0.06732	5.24e-05	-4.045	0.954343	rs3922614	29	CNBD1	0	intronic	1.715	6	9	15
8:88403917:G:T	rs7000211	8	88403917	T	G	0.4039	5.666e-05	4.026	0.990325	rs67620422	29	CNBD1	0	intronic	0.641	6	9	15
8:88405129:C:G	rs4961032	8	88405129	G	C	0.1074	7.796e-06	-4.471	0.955145	rs4961035	29	CNBD1	0	intronic	4.185	7	9	15
8:88405893:A:C	rs13275312	8	88405893	A	C	0.1074	7.796e-06	-4.471	0.955145	rs4961035	29	CNBD1	0	intronic	2.35	7	9	15
8:88407796:A:C	rs13252829	8	88407796	A	C	0.06732	5.24e-05	-4.045	0.954343	rs3922614	29	CNBD1	0	intronic	5.969	5	9	15
8:88408914:C:T	rs7842573	8	88408914	C	T	0.4501	7.832e-05	3.949	0.804026	rs67620422	29	CNBD1	0	intronic	5.185	6	9	15
8:88411051:G:T	rs10087899	8	88411051	T	G	0.06732	5.24e-05	-4.045	0.954343	rs3922614	29	CNBD1	0	intronic	3.634	7	9	15
8:88413427:C:T	rs3922614	8	88413427	C	T	0.0643	9.782e-06	-4.422	1	rs3922614	29	CNBD1	0	intronic	1.793	NA	9	15
8:88418582:C:G	rs57494548	8	88418582	G	C	0.4372	0.000237	3.676	0.82053	rs67620422	29	CNBD1	0	intronic	1.974	6	9	15
8:88419066:C:T	rs60006352	8	88419066	T	C	0.4002	4.423e-05	4.084	0.980577	rs67620422	29	CNBD1	0	intronic	2.58	7	9	15
8:88419723:A:T	rs10089691	8	88419723	A	T	0.06808	4.754e-05	-4.067	0.944959	rs3922614	29	CNBD1	0	intronic	4.509	6	9	15
8:88420137:C:G	rs4131947	8	88420137	G	C	0.4002	8.555e-05	3.928	0.980577	rs67620422	29	CNBD1	0	intronic	1.45	6	9	15
8:88420621:A:G	rs4130029	8	88420621	G	A	0.4679	0.000237	3.676	0.819835	rs67620422	29	CNBD1	0	intronic	0.038	NA	9	15
8:88421332:A:G	rs10107014	8	88421332	A	G	0.1089	6.622e-06	-4.506	0.984977	rs4961035	29	CNBD1	0	intronic	1.334	7	9	15
8:88425794:A:G	rs13257198	8	88425794	G	A	0.06732	5.24e-05	-4.045	0.954343	rs3922614	29	CNBD1	0	intronic	0.725	5	9	15
8:88436165:A:G	rs56903658	8	88436165	G	A	0.4652	0.0002072	3.71	0.70715	rs67620422	29	CNBD1	0	intronic	1.084	6	15	15
8:88439189:A:G	rs4961034	8	88439189	A	G	0.1104	1.734e-06	-4.782	0.985103	rs4961035	29	CNBD1	0	intronic	2.004	6	9	15
8:88440363:A:C	rs1033355	8	88440363	A	C	0.3578	3.022e-05	4.172	0.807756	rs67620422	29	CNBD1	0	intronic	1.749	6	7	15
8:88444644:A:C	rs11786192	8	88444644	A	C	0.0711	5.24e-05	-4.045	0.902053	rs3922614	29	CNBD1	0	intronic	1.275	6	5	15
8:88444759:C:T	rs13277763	8	88444759	C	T	0.06732	5.24e-05	-4.045	0.954343	rs3922614	29	CNBD1	0	intronic	2.075	7	5	15
8:88444813:A:G	rs16868674	8	88444813	A	G	0.438	0.000218	3.697	0.817812	rs67620422	29	CNBD1	0	intronic	0.121	6	5	15
8:88446402:A:G	rs4961035	8	88446402	G	A	0.1089	1.712e-06	-4.785	1	rs4961035	29	CNBD1	0	intronic	2.797	6	1	15
8:88446996:A:T	rs62528197	8	88446996	T	A	0.4652	0.0002003	3.719	0.731532	rs67620422	29	CNBD1	0	intronic	1.526	5	1	15
8:88447256:C:T	rs4961036	8	88447256	C	T	0.06732	5.24e-05	-4.045	0.954343	rs3922614	29	CNBD1	0	intronic	8.424	6	5	15
8:88448451:A:C	rs2158024	8	88448451	A	C	0.4387	0.0002043	3.714	0.827968	rs67620422	29	CNBD1	0	intronic	2.288	NA	5	15
8:88450505:C:T	rs7007340	8	88450505	C	T	0.4614	0.0003643	3.565	0.718179	rs67620422	29	CNBD1	0	intronic	2.411	6	5	15
8:88451088:A:G	rs7007973	8	88451088	G	A	0.438	0.0001249	3.836	0.824245	rs67620422	29	CNBD1	0	intronic	2.065	4	5	15
8:88452971:C:G	rs4418360	8	88452971	C	G	0.3427	3.517e-06	-4.638	1	rs28841989	29	CNBD1	0	intronic	0.008	7	5	15
8:88453028:A:C	rs28841989	8	88453028	A	C	0.3427	2.934e-06	-4.675	1	rs28841989	29	CNBD1	0	intronic	1.701	6	5	15
8:88453499:C:G	rs13270226	8	88453499	G	C	0.06732	5.24e-05	-4.045	0.954343	rs3922614	29	CNBD1	0	intronic	12.5	7	5	15
8:88454380:A:G	rs4960940	8	88454380	G	A	0.1097	1.712e-06	-4.785	0.96275	rs4961035	29	CNBD1	0	intronic	2.119	6	5	15
8:88454673:A:G	rs7826910	8	88454673	G	A	0.4448	4.823e-05	4.064	0.812307	rs67620422	29	CNBD1	0	intronic	1.176	6	5	15
8:88455165:C:G	rs56163059	8	88455165	G	C	0.4448	4.823e-05	4.064	0.812307	rs67620422	29	CNBD1	0	intronic	0.489	6	5	15
8:88455757:A:T	rs13264189	8	88455757	A	T	0.06657	5.24e-05	-4.045	0.942231	rs3922614	29	CNBD1	0	intronic	5.266	6	5	15
8:88456344:C:G	rs990972	8	88456344	G	C	0.4418	4.823e-05	4.064	0.811477	rs67620422	29	CNBD1	0	intronic	2.303	7	5	15
8:88461083:A:T	rs9792389	8	88461083	T	A	0.4039	9.052e-06	-4.439	0.720777	rs28841989	29	CNBD1	0	intronic	3.277	7	9	15
8:88461084:A:C	rs9792390	8	88461084	C	A	0.4039	1.032e-05	-4.41	0.715023	rs28841989	29	CNBD1	0	intronic	1.877	7	9	15
8:88461836:A:G	rs13278249	8	88461836	A	G	0.06278	6.091e-05	-4.009	0.903381	rs3922614	29	CNBD1	0	intronic	7.492	7	9	15
8:128571759:C:T	rs4313118	8	128571759	C	T	0.1861	6.538e-05	-3.993	0.806226	rs74815096	30	CASC8	77374	intergenic	0.516	2b	2	15
8:128572345:G:T	rs6995840	8	128572345	G	T	0.1884	6.338e-05	-4	0.821394	rs74815096	30	CASC8	77960	intergenic	2.545	4	5	15
8:128572878:A:G	rs6470533	8	128572878	G	A	0.1838	0.0001131	-3.861	0.847729	rs74815096	30	CASC8	78493	intergenic	3.085	3a	5	15
8:128573191:C:T	rs78122878	8	128573191	C	T	0.1876	0.0001131	-3.861	0.825845	rs74815096	30	CASC8	78806	intergenic	3.415	5	5	15
8:128576061:C:T	rs74354358	8	128576061	T	C	0.1316	0.0003529	-3.573	0.696314	rs74815096	30	CASC8	81676	intergenic	7.598	4	2	15
8:128577207:A:C	rs76597555	8	128577207	C	A	0.1717	5.911e-05	-4.016	0.94726	rs74815096	30	CASC8	82822	intergenic	0.833	5	2	15
8:128577675:C:T	rs74815096	8	128577675	C	T	0.1778	6.793e-06	-4.5	1	rs74815096	30	CASC8	83290	intergenic	0.128	3a	5	15
9:78492036:C:T	rs78358165	9	78492036	T	C	0.2027	7.978e-06	4.466	0.987167	rs28687781	31	PCSK5	13523	intergenic	2.864	5	5	15
9:78492815:C:G	rs7867553	9	78492815	C	G	0.2042	5.868e-06	4.531	0.987206	rs28687781	31	PCSK5	12744	intergenic	0.543	4	5	15
9:78495308:A:C	rs7863217	9	78495308	C	A	0.205	6.259e-06	4.517	0.991548	rs28687781	31	PCSK5	10251	intergenic	0.198	6	5	15
9:78495438:C:T	rs7866449	9	78495438	C	T	0.205	6.084e-06	4.523	0.991548	rs28687781	31	PCSK5	10121	intergenic	9.188	5	5	15
9:78496674:A:G	rs28687781	9	78496674	G	A	0.2035	5.325e-06	4.552	1	rs28687781	31	PCSK5	8885	intergenic	1.105	6	5	15
9:78501459:C:G	rs7022215	9	78501459	C	G	0.202	5.777e-06	4.534	0.991462	rs28687781	31	PCSK5	4100	intergenic	NA	7	5	15
9:78503618:C:T	rs11144665	9	78503618	T	C	0.1982	1.296e-05	4.361	0.912516	rs28687781	31	PCSK5	1941	intergenic	8.109	7	5	15
9:126965953:A:G	rs150581713	9	126965953	G	A	0.1596	0.01089	-2.546	0.726242	rs58733878	32	NEK6	53931	intergenic	0.008	6	2	15
9:126965961:C:T	rs139700443	9	126965961	T	C	0.1498	0.01285	-2.488	0.780355	rs58733878	32	NEK6	53923	intergenic	1.399	5	2	15
9:126968063:G:T	rs12005455	9	126968063	G	T	0.1377	1.717e-05	-4.299	1	rs58733878	32	NEK6	51821	intergenic	14.45	4	5	15
9:126968674:C:G	rs58733878	9	126968674	C	G	0.1377	5.591e-06	-4.541	1	rs58733878	32	NEK6	51210	intergenic	0.54	5	5	15
9:134532331:A:G	rs11794161	9	134532331	G	A	0.06278	9.436e-07	-4.903	1	rs11794161	33	RAPGEF1	0	intronic	2.609	4	2	7
9:134560515:A:G	rs34168569	9	134560515	G	A	0.05219	0.0002704	-3.642	0.684883	rs11794161	33	RAPGEF1	0	intronic	10.86	6	5	5
9:134563146:G:T	rs11792108	9	134563146	G	T	0.05144	0.0002704	-3.642	0.673211	rs11794161	33	RAPGEF1	0	intronic	6.474	7	4	5
9:134570545:A:G	rs62583094	9	134570545	G	A	0.05219	0.0002704	-3.642	0.684883	rs11794161	33	RAPGEF1	0	intronic	2.371	5	4	5
9:134570606:C:T	rs34842588	9	134570606	C	T	0.05219	0.0002704	-3.642	0.684883	rs11794161	33	RAPGEF1	0	intronic	1.473	5	4	5
9:134571358:A:C	rs62583095	9	134571358	C	A	0.05219	0.0002704	-3.642	0.684883	rs11794161	33	RAPGEF1	0	intronic	0.181	5	4	7
9:134572638:A:G	rs35424590	9	134572638	G	A	0.05219	0.0002704	-3.642	0.684883	rs11794161	33	RAPGEF1	0	intronic	1.392	2b	5	7
9:134575351:A:C	rs55643208	9	134575351	A	C	0.05219	0.0002704	-3.642	0.684883	rs11794161	33	RAPGEF1	0	intronic	NA	7	5	5
9:134584308:C:T	rs13283933	9	134584308	T	C	0.05219	0.0002704	-3.642	0.684883	rs11794161	33	RAPGEF1	0	intronic	0.854	7	1	5
9:134587304:A:G	rs62583099	9	134587304	A	G	0.05219	0.0002704	-3.642	0.684883	rs11794161	33	RAPGEF1	0	intronic	5.3	7	4	5
9:136780781:C:T	rs112473634	9	136780781	T	C	0.05598	9.516e-06	-4.428	1	rs112473634	34	VAV2	0	intronic	3.85	4	2	7
9:136780831:C:T	rs112252635	9	136780831	T	C	0.05598	1.026e-05	-4.412	1	rs112473634	34	VAV2	0	intronic	9.658	4	2	7
9:136782519:A:T	rs111794901	9	136782519	T	A	0.05598	8.803e-05	-3.921	1	rs112473634	34	VAV2	0	intronic	1.212	5	5	5
9:136786697:A:G	rs112657871	9	136786697	A	G	0.05144	2.82e-05	-4.188	0.917175	rs112473634	34	VAV2	0	intronic	8.91	5	4	5
10:106781929:A:G	rs7095209	10	106781929	A	G	0.4493	1.233e-07	5.288	1	rs7095209	35	SORCS3	0	intronic	1.521	6	5	15
10:106789694:C:T	rs7083262	10	106789694	C	T	0.3873	7.836e-06	4.47	1	rs7083262	35	SORCS3	0	intronic	10.08	7	7	15
10:115390091:C:T	rs55729345	10	115390091	C	T	0.3502	3.184e-06	-4.659	1	rs55729345	36	NRAP	0	intronic	2.223	6	4	15
10:115390182:C:T	rs56273432	10	115390182	C	T	0.3502	3.184e-06	-4.659	1	rs56273432	36	NRAP	0	intronic	4.914	6	4	15
10:115392919:A:T	rs2270182	10	115392919	A	T	0.3336	8.009e-06	-4.465	1	rs2270182	36	NRAP	0	exonic	22.5	7	5	15
11:2307694:C:T	11:2307694	11	2307694	T	C	0.05598	3.82e-06	-4.621	1	11:2307694	37	C11orf21	9180	intergenic	2.788	6	5	14
11:3499256:C:G	rs146437648	11	3499256	G	C	0.06505	4.797e-05	-4.065	0.963794	rs116449999	38	RP13-726E6.1	0	ncRNA_intronic	2.19	7	5	15
11:3500291:A:G	rs7482380	11	3500291	A	G	0.06354	5.307e-05	-4.042	0.987532	rs116449999	38	RP13-726E6.1	0	ncRNA_intronic	3.01	5	5	15
11:3501528:C:T	rs147330820	11	3501528	C	T	0.0643	3.68e-05	-4.127	1	rs116449999	38	RP13-726E6.1	0	ncRNA_intronic	1.958	7	5	15
11:3502266:C:T	rs140275840	11	3502266	T	C	0.07943	9.367e-06	-4.431	0.80278	rs116449999	38	RP13-726E6.1	0	ncRNA_intronic	4.719	7	5	15
11:3504037:G:T	rs187293353	11	3504037	T	G	0.0643	2.267e-06	-4.728	1	rs116449999	38	RP13-726E6.1:RP13-726E6.2	00:00:00	ncRNA_intronic	2.305	7	5	15
11:3506177:A:G	rs116449999	11	3506177	A	G	0.0643	2.267e-06	-4.728	1	rs116449999	38	RP13-726E6.1:RP13-726E6.2	00:00:00	ncRNA_intronic	3.247	5	5	15
11:3510782:C:G	rs138020108	11	3510782	C	G	0.06127	0.0001578	-3.778	0.925727	rs116449999	38	RP13-726E6.1:RP13-726E6.2	00:00:00	ncRNA_intronic	7.519	7	5	15
11:3511405:A:C	rs137899663	11	3511405	A	C	0.0711	6.611e-05	-3.99	0.769791	rs116449999	38	RP13-726E6.1:RP13-726E6.2	00:00:00	ncRNA_intronic	6.117	7	5	15
11:3511424:A:G	rs149747160	11	3511424	A	G	0.05976	0.0001006	-3.889	0.92583	rs116449999	38	RP13-726E6.1:RP13-726E6.2	00:00:00	ncRNA_intronic	3.78	6	5	15
11:3511500:C:T	rs146073507	11	3511500	T	C	0.05976	0.0001006	-3.889	0.92583	rs116449999	38	RP13-726E6.1:RP13-726E6.2	00:00:00	ncRNA_intronic	3.286	7	5	15
11:3513749:A:G	rs143717342	11	3513749	A	G	0.05976	7.828e-06	-4.47	0.92583	rs116449999	38	RP13-726E6.1:RP13-726E6.2	00:00:00	ncRNA_intronic	1.274	7	5	15
11:3519000:A:G	rs141484982	11	3519000	A	G	0.05976	0.0001006	-3.889	0.92583	rs116449999	38	RP13-726E6.1:RP13-726E6.2	00:00:00	ncRNA_intronic	0.925	6	5	15
11:3519799:C:G	rs147053320	11	3519799	G	C	0.06051	1.363e-05	-4.35	0.72832	rs116449999	38	RP13-726E6.1:RP13-726E6.2	00:00:00	ncRNA_intronic	NA	5	5	15
11:3520133:A:C	rs117493043	11	3520133	C	A	0.06959	8.26e-05	-3.937	0.770267	rs116449999	38	RP13-726E6.1:RP13-726E6.2	00:00:00	ncRNA_intronic	0.402	6	7	15
11:3522440:G:T	rs61878257	11	3522440	T	G	0.07489	0.0004889	-3.487	0.711955	rs116449999	38	RP13-726E6.1:RP13-726E6.2	00:00:00	ncRNA_intronic	0.835	6	4	15
11:3523022:A:C	rs56186443	11	3523022	C	A	0.07413	0.000196	-3.724	0.719822	rs116449999	38	RP13-726E6.1:RP13-726E6.2	00:00:00	ncRNA_intronic	0.267	6	5	15
11:3523418:A:G	rs113136757	11	3523418	G	A	0.06505	0.0003893	-3.547	0.844954	rs116449999	38	RP13-726E6.1:RP13-726E6.2	00:00:00	ncRNA_intronic	3.304	6	5	15
12:12271739:C:T	rs11054696	12	12271739	C	T	0.05598	3.954e-06	-4.614	1	rs11054696	39	BCL2L14:LRP6	00:00:00	UTR3	16.57	7	4	5
12:12272466:C:G	rs12314259	12	12272466	G	C	0.08169	5.505e-05	-4.033	0.666457	rs11054696	39	BCL2L14:LRP6	00:00:00	UTR3	8.408	5	4	5
12:117978246:C:G	rs75026504	12	117978246	G	C	0.05219	6.384e-07	-4.979	1	rs75026504	40	KSR2	0	intronic	0.358	5	5	15
12:117978411:A:T	rs79859444	12	117978411	A	T	0.05219	6.384e-07	-4.979	1	rs79859444	40	KSR2	0	intronic	7.144	7	5	15
13:50107718:C:T	rs73493257	13	50107718	T	C	0.07791	0.0315	-2.151	0.633547	rs57884356	41	RCBTB1	0	UTR3	1.853	7	2	5
13:50113218:A:C	rs113806809	13	50113218	A	C	0.09531	0.04407	-2.013	0.714022	rs57884356	41	RCBTB1	0	intronic	2.978	7	4	5
13:50125587:C:T	rs73493297	13	50125587	C	T	0.08396	0.0006029	-3.43	0.806816	rs57884356	41	RCBTB1	0	exonic	6.839	5	2	4
13:50128728:A:G	rs111672228	13	50128728	A	G	0.1067	1.208e-05	-4.376	0.945408	rs57884356	41	RCBTB1	0	intronic	3.465	4	4	5
13:50131371:C:T	rs73495237	13	50131371	T	C	0.1369	0.01838	-2.358	0.731638	rs57884356	41	RCBTB1	0	intronic	0.293	4	4	5
13:50132466:C:G	rs73495246	13	50132466	G	C	0.1369	0.01838	-2.358	0.731638	rs57884356	41	RCBTB1	0	intronic	2.582	6	4	4
13:50133656:C:G	rs57884356	13	50133656	C	G	0.1029	9.507e-06	-4.428	1	rs57884356	41	RCBTB1	0	intronic	0.238	6	4	4
13:50135032:A:G	rs73495265	13	50135032	A	G	0.1331	0.0165	-2.398	0.758309	rs57884356	41	RCBTB1	0	intronic	0.998	4	1	5
13:50150580:A:G	rs73495301	13	50150580	G	A	0.08094	0.002053	-3.082	0.776998	rs57884356	41	RCBTB1	0	intronic	2.772	7	4	5
13:50161281:G:T	rs58258059	13	50161281	G	T	0.07943	0.0004294	-3.521	0.762447	rs57884356	41	RCBTB1	1561	intergenic	2.801	4	2	15
13:50165471:C:T	rs112017404	13	50165471	T	C	0.1074	1.349e-07	-5.272	1	rs112017404	41	RCBTB1	5751	intergenic	6.617	6	5	15
13:50169651:A:G	rs144170770	13	50169651	G	A	0.1074	1.349e-07	-5.272	1	rs112017404	41	RCBTB1	9931	intergenic	2.021	7	5	15
13:50170562:A:C	rs4941649	13	50170562	C	A	0.1089	1.349e-07	-5.272	0.98451	rs112017404	41	RCBTB1	10842	intergenic	2.624	3a	7	15
13:50172436:A:G	rs4942852	13	50172436	G	A	0.1089	2.423e-06	-4.714	0.98451	rs112017404	41	RCBTB1	12716	intergenic	11.82	6	5	15
13:50287099:G:T	rs79539896	13	50287099	G	T	0.06581	3.938e-05	-4.111	0.940829	rs186255622	41	KPNA3	0	intronic	5.079	6	4	5
13:50358384:A:T	rs186255622	13	50358384	A	T	0.06505	7.668e-06	-4.474	1	rs186255622	41	KPNA3	0	intronic	0.217	5	5	5
13:83621466:G:T	13:83621466	13	83621466	G	T	0.1528	2.658e-05	4.201	0.785477	rs2819241	42	RP11-464I4.1	98208	intergenic	0.215	7	7	15
13:83627255:A:G	rs2639477	13	83627255	A	G	0.1309	1.229e-05	4.372	0.782841	rs2819241	42	RP11-464I4.1	92419	intergenic	1.18	NA	9	15
13:83633344:A:T	rs2639514	13	83633344	T	A	0.1407	3.885e-06	4.617	0.855502	rs2819241	42	RP11-464I4.1	86330	intergenic	0.608	6	5	15
13:83645801:C:T	rs1388984	13	83645801	T	C	0.1422	1.408e-06	4.824	0.900253	rs2819241	42	RP11-464I4.1	73873	intergenic	0.317	6	5	15
13:83647538:A:G	rs2639471	13	83647538	G	A	0.1467	1.408e-06	4.824	0.934994	rs2819241	42	RP11-464I4.1	72136	intergenic	1.487	5	7	15
13:83651664:C:G	rs1492727	13	83651664	G	C	0.1505	2.245e-06	4.73	0.9182	rs2819241	42	RP11-464I4.1	68010	intergenic	1.672	6	14	15
13:83654140:G:T	rs1907811	13	83654140	T	G	0.146	1.408e-06	4.824	0.940791	rs2819241	42	RP11-464I4.1	65534	intergenic	NA	7	9	15
13:83655252:C:T	rs2262463	13	83655252	T	C	0.1278	6.049e-06	4.525	0.815916	rs2819241	42	RP11-464I4.1	64422	intergenic	1.55	7	9	15
13:83669281:C:T	rs265704	13	83669281	C	T	0.1467	1.408e-06	4.824	0.946662	rs2819241	42	RP11-464I4.1	50393	intergenic	0.792	7	4	15
13:83685331:C:T	rs265667	13	83685331	T	C	0.2126	0.0002954	3.619	0.629229	rs2819241	42	RP11-464I4.1	34343	intergenic	3.331	NA	14	15
13:83686781:C:T	rs2996568	13	83686781	T	C	0.1445	1.607e-06	4.797	0.964319	rs2819241	42	RP11-464I4.1	32893	intergenic	0.085	7	9	15
13:83687737:C:T	rs265676	13	83687737	C	T	0.1445	1.607e-06	4.797	0.964319	rs2819241	42	RP11-464I4.1	31937	intergenic	5.301	7	9	15
13:83688524:A:G	rs265677	13	83688524	A	G	0.1399	1.607e-06	4.797	0.929372	rs2819241	42	RP11-464I4.1	31150	intergenic	2.357	7	7	15
13:83688705:G:T	rs1780079	13	83688705	T	G	0.208	0.0002868	3.627	0.644283	rs2819241	42	RP11-464I4.1	30969	intergenic	0.723	7	9	15
13:83689060:C:T	rs265678	13	83689060	C	T	0.1399	1.607e-06	4.797	0.929372	rs2819241	42	RP11-464I4.1	30614	intergenic	10.65	6	9	15
13:83691508:A:C	rs265682	13	83691508	A	C	0.2057	0.0003419	3.581	0.668034	rs2819241	42	RP11-464I4.1	28166	intergenic	0.473	7	9	15
13:83691912:C:T	rs265685	13	83691912	C	T	0.2057	0.0003419	3.581	0.668034	rs2819241	42	RP11-464I4.1	27762	intergenic	2.051	6	9	15
13:83704018:A:C	rs2819299	13	83704018	C	A	0.2005	0.0003295	3.591	0.685612	rs2819241	42	RP11-464I4.1	15656	intergenic	2.37	6	9	15
13:83704719:A:C	rs2819304	13	83704719	C	A	0.1997	0.0003295	3.591	0.671237	rs2819241	42	RP11-464I4.1	14955	intergenic	NA	7	9	15
13:83706028:A:G	rs2669201	13	83706028	G	A	0.2005	0.0002478	3.665	0.685612	rs2819241	42	RP11-464I4.1	13646	intergenic	0.159	6	9	15
13:83706474:C:T	rs2137437	13	83706474	C	T	0.1399	1.417e-06	4.823	0.929372	rs2819241	42	RP11-464I4.1	13200	intergenic	9.692	6	9	15
13:83708502:A:C	rs9546297	13	83708502	A	C	0.2042	0.0002693	3.643	0.676648	rs2819241	42	RP11-464I4.1	11172	intergenic	0.08	7	9	15
13:83708534:C:T	rs2243849	13	83708534	C	T	0.2042	0.0002818	3.631	0.676648	rs2819241	42	RP11-464I4.1	11140	intergenic	1.608	6	9	15
13:83709021:A:C	rs2669204	13	83709021	A	C	0.1399	1.417e-06	4.823	0.941216	rs2819241	42	RP11-464I4.1	10653	intergenic	2.839	6	9	15
13:83709519:C:T	rs2819241	13	83709519	C	T	0.1475	1.327e-06	4.836	1	rs2819241	42	RP11-464I4.1	10155	intergenic	1.806	6	9	15
13:83710918:C:G	rs1828632	13	83710918	C	G	0.1445	1.417e-06	4.823	0.964367	rs2819241	42	RP11-464I4.1	8756	intergenic	0.701	7	9	15
13:83711342:A:T	rs2175644	13	83711342	A	T	0.149	2.081e-06	4.745	0.988164	rs2819241	42	RP11-464I4.1	8332	intergenic	6.192	6	9	15
13:83713133:C:T	rs2257208	13	83713133	T	C	0.1445	3.965e-06	4.613	0.940797	rs2819241	42	RP11-464I4.1	6541	intergenic	1.376	6	15	15
13:83714499:A:C	rs2669209	13	83714499	A	C	0.1467	3.58e-06	4.634	0.970342	rs2819241	42	RP11-464I4.1	5175	intergenic	0.563	5	15	15
13:83716171:A:G	rs2819251	13	83716171	A	G	0.1475	3.58e-06	4.634	0.976258	rs2819241	42	RP11-464I4.1	3503	intergenic	8.502	6	9	15
13:83716572:G:T	rs76474731	13	83716572	T	G	0.1399	3.965e-06	4.613	0.917602	rs2819241	42	RP11-464I4.1	3102	intergenic	0.054	7	9	15
13:83722227:A:T	rs265643	13	83722227	A	T	0.1445	3.965e-06	4.613	0.940605	rs2819241	42	RP11-464I4.1	2188	intergenic	10.85	7	9	15
13:83723963:A:G	rs2819255	13	83723963	A	G	0.1483	3.58e-06	4.634	0.970414	rs2819241	42	RP11-464I4.1	3924	intergenic	0.88	7	5	15
13:83724932:C:G	rs174730	13	83724932	G	C	0.1551	1.516e-05	4.326	0.709243	rs2819241	42	RP11-464I4.1	4893	intergenic	0.426	7	1	15
13:83726724:A:G	rs265653	13	83726724	G	A	0.1551	1.516e-05	4.326	0.709243	rs2819241	42	RP11-464I4.1	6685	intergenic	1.076	NA	7	15
13:83726786:A:G	rs265652	13	83726786	A	G	0.1051	0.0008682	3.33	0.659757	rs2819241	42	RP11-464I4.1	6747	intergenic	4.112	NA	7	15
13:83727283:C:T	rs265650	13	83727283	C	T	0.1505	1.603e-05	4.314	0.673605	rs2819241	42	RP11-464I4.1	7244	intergenic	2.623	NA	5	15
13:83727354:A:T	rs265649	13	83727354	T	A	0.1505	1.603e-05	4.314	0.673605	rs2819241	42	RP11-464I4.1	7315	intergenic	2.387	3b	5	15
13:83731632:A:C	rs2669216	13	83731632	A	C	0.1558	1.457e-05	4.335	0.706539	rs2819241	42	RP11-464I4.1	11593	intergenic	0.315	7	5	15
13:83732664:C:T	rs2669217	13	83732664	T	C	0.1626	4.464e-05	4.082	0.64883	rs2819241	42	RP11-464I4.1	12625	intergenic	2.165	6	5	15
13:83733242:C:T	rs2669218	13	83733242	T	C	0.1626	4.464e-05	4.082	0.64883	rs2819241	42	RP11-464I4.1	13203	intergenic	0.847	6	5	15
13:83734346:C:T	rs2669219	13	83734346	T	C	0.1626	4.464e-05	4.082	0.64883	rs2819241	42	RP11-464I4.1	14307	intergenic	2.39	7	5	15
13:83734452:A:T	rs2221889	13	83734452	T	A	0.1626	4.464e-05	4.082	0.64883	rs2819241	42	RP11-464I4.1	14413	intergenic	0.009	7	5	15
14:64347625:C:T	rs4902252	14	64347625	C	T	0.3313	2.95e-06	4.674	0.903272	rs2357001	43	SYNE2	0	intronic	0.098	7	4	5
14:64347631:C:G	rs7153723	14	64347631	C	G	0.3313	2.95e-06	4.674	0.903272	rs2357001	43	SYNE2	0	intronic	0.075	7	4	5
14:64350068:C:T	rs8022917	14	64350068	C	T	0.3139	1.276e-05	4.364	0.822994	rs2357001	43	SYNE2	0	intronic	0.599	7	4	5
14:64352150:C:G	rs12435958	14	64352150	C	G	0.3533	7.007e-07	4.961	0.993424	rs2357001	43	SYNE2	0	intronic	0.147	5	4	5
14:64352814:A:G	rs2357001	14	64352814	G	A	0.3548	7.007e-07	4.961	1	rs2357001	43	SYNE2	0	intronic	2.442	5	2	5
14:64353440:A:C	rs12894053	14	64353440	C	A	0.3154	8.772e-06	4.445	0.827964	rs2357001	43	SYNE2	0	intronic	0.691	7	5	5
14:64353738:C:T	rs12895879	14	64353738	C	T	0.3548	7.185e-07	4.956	1	rs2357001	43	SYNE2	0	intronic	8.326	7	5	5
14:64353862:A:G	rs12894864	14	64353862	G	A	0.3094	5.686e-06	4.538	0.801871	rs2357001	43	SYNE2	0	intronic	3.59	7	5	5
14:64354419:C:T	rs8005899	14	64354419	C	T	0.2769	0.001797	3.122	0.679486	rs2357001	43	SYNE2	0	intronic	1.261	7	5	5
14:64354638:C:T	rs8004989	14	64354638	T	C	0.354	8.427e-07	4.925	0.996702	rs2357001	43	SYNE2	0	intronic	1.653	7	5	5
14:64355183:C:T	rs945031	14	64355183	C	T	0.3979	8.32e-06	4.457	0.831685	rs2357001	43	SYNE2	0	intronic	4.454	7	4	5
14:64355690:C:T	rs7493416	14	64355690	C	T	0.3449	0.0001087	3.87	0.611978	rs2357001	43	SYNE2	0	intronic	2.666	6	5	5
14:64361496:A:T	rs1000904	14	64361496	A	T	0.3699	9.719e-06	4.423	0.658268	rs2357001	43	SYNE2	0	intronic	1.814	7	5	5
14:88273402:A:G	rs2060679	14	88273402	G	A	0.3593	0.002005	-3.09	0.837105	rs11851487	44	RP11-1152H15.1	0	ncRNA_intronic	4.804	5	5	15
14:88274016:C:T	rs17123783	14	88274016	C	T	0.3578	0.001935	-3.1	0.845166	rs11851487	44	RP11-1152H15.1	0	ncRNA_intronic	1.26	6	5	15
14:88274454:A:C	rs4904395	14	88274454	A	C	0.3578	0.001935	-3.1	0.845166	rs11851487	44	RP11-1152H15.1	0	ncRNA_intronic	0.975	7	5	15
14:88275097:C:T	rs7142101	14	88275097	T	C	0.3578	0.001935	-3.1	0.845166	rs11851487	44	RP11-1152H15.1	0	ncRNA_intronic	NA	6	5	15
14:88275270:G:T	rs7142767	14	88275270	T	G	0.3578	0.001935	-3.1	0.845166	rs11851487	44	RP11-1152H15.1	0	ncRNA_intronic	0.571	7	5	15
14:88275924:C:T	rs11848779	14	88275924	T	C	0.3578	0.001935	-3.1	0.845166	rs11851487	44	RP11-1152H15.1	0	ncRNA_intronic	4.138	7	5	15
14:88275954:A:C	rs12881243	14	88275954	A	C	0.3578	0.001935	-3.1	0.845166	rs11851487	44	RP11-1152H15.1	0	ncRNA_intronic	6.261	7	5	15
14:88275989:A:G	rs11849666	14	88275989	A	G	0.3585	0.001935	-3.1	0.848313	rs11851487	44	RP11-1152H15.1	0	ncRNA_intronic	4.069	7	5	15
14:88276389:A:G	rs11849818	14	88276389	A	G	0.3578	0.001935	-3.1	0.845166	rs11851487	44	RP11-1152H15.1	0	ncRNA_intronic	1.824	6	5	15
14:88277031:G:T	rs8017474	14	88277031	G	T	0.3578	0.001935	-3.1	0.845166	rs11851487	44	RP11-1152H15.1	0	ncRNA_intronic	0.22	6	2	15
14:88277348:C:T	rs8016795	14	88277348	T	C	0.3578	0.001935	-3.1	0.845166	rs11851487	44	RP11-1152H15.1:RP11-804L24.2	00:00:00	ncRNA_exonic	5.899	3a	2	15
14:88277705:A:G	rs11851032	14	88277705	G	A	0.3578	0.001935	-3.1	0.845166	rs11851487	44	RP11-1152H15.1:RP11-804L24.2	00:00:00	ncRNA_intronic	0.256	5	5	15
14:88278093:A:G	rs11851938	14	88278093	G	A	0.3578	0.001935	-3.1	0.845166	rs11851487	44	RP11-1152H15.1:RP11-804L24.2	00:00:00	ncRNA_intronic	0.79	5	5	15
14:88278451:C:T	rs4430682	14	88278451	C	T	0.3585	0.001935	-3.1	0.848313	rs11851487	44	RP11-1152H15.1:RP11-804L24.2	00:00:00	ncRNA_intronic	1.8	7	5	15
14:88278596:A:G	rs55804742	14	88278596	G	A	0.3578	0.001935	-3.1	0.845166	rs11851487	44	RP11-1152H15.1:RP11-804L24.2	00:00:00	ncRNA_intronic	1.269	7	5	15
14:88278648:A:C	rs58798197	14	88278648	C	A	0.3578	0.001935	-3.1	0.845166	rs11851487	44	RP11-1152H15.1:RP11-804L24.2	00:00:00	ncRNA_intronic	0.922	5	5	15
14:88278939:A:G	rs59216435	14	88278939	G	A	0.3858	0.001337	-3.208	0.98076	rs11851487	44	RP11-1152H15.1:RP11-804L24.2	00:00:00	ncRNA_intronic	2.004	7	5	15
14:88279750:A:G	rs35426206	14	88279750	A	G	0.385	0.00132	-3.212	0.976891	rs11851487	44	RP11-1152H15.1:RP11-804L24.2	00:00:00	ncRNA_intronic	4.382	5	5	15
14:88279809:A:G	rs35333951	14	88279809	A	G	0.385	0.001337	-3.208	0.976891	rs11851487	44	RP11-1152H15.1:RP11-804L24.2	00:00:00	ncRNA_intronic	19.31	5	5	15
14:88279871:C:T	rs35473069	14	88279871	T	C	0.385	0.001337	-3.208	0.976891	rs11851487	44	RP11-1152H15.1:RP11-804L24.2	00:00:00	ncRNA_exonic	8.066	5	5	15
14:88279971:C:T	rs35975215	14	88279971	C	T	0.3865	0.001337	-3.208	0.977006	rs11851487	44	RP11-1152H15.1:RP11-804L24.2	00:00:00	ncRNA_exonic	0.159	7	5	15
14:88280893:C:T	rs4899925	14	88280893	T	C	0.3865	0.001288	-3.219	0.984679	rs11851487	44	RP11-1152H15.1:RP11-804L24.2	00:00:00	ncRNA_intronic	4.005	6	5	15
14:88281769:A:G	rs8022615	14	88281769	A	G	0.3858	0.001445	-3.185	0.988485	rs11851487	44	RP11-1152H15.1:RP11-804L24.2	00:00:00	ncRNA_intronic	1.489	7	5	15
14:88282530:A:G	rs11844852	14	88282530	G	A	0.385	0.001187	-3.242	0.992307	rs11851487	44	RP11-1152H15.1:RP11-804L24.2	00:00:00	ncRNA_exonic	0.068	7	5	15
14:88282894:C:G	rs12883197	14	88282894	C	G	0.3835	0.001187	-3.242	0.98461	rs11851487	44	RP11-1152H15.1:RP11-804L24.2	00:00:00	ncRNA_intronic	NA	7	5	15
14:88283132:C:G	rs60472795	14	88283132	G	C	0.385	0.001187	-3.242	0.992307	rs11851487	44	RP11-1152H15.1:RP11-804L24.2	00:00:00	ncRNA_intronic	3.675	6	5	15
14:88283621:C:G	rs60080584	14	88283621	C	G	0.385	0.001187	-3.242	0.992307	rs11851487	44	RP11-1152H15.1:RP11-804L24.2	00:00:00	ncRNA_intronic	7.615	7	5	15
14:88283640:C:T	rs57819500	14	88283640	T	C	0.385	0.001187	-3.242	0.992307	rs11851487	44	RP11-1152H15.1:RP11-804L24.2	00:00:00	ncRNA_intronic	4.087	7	5	15
14:88283649:A:G	rs60093072	14	88283649	A	G	0.385	0.001187	-3.242	0.992307	rs11851487	44	RP11-1152H15.1:RP11-804L24.2	00:00:00	ncRNA_intronic	0.391	7	5	15
14:88283756:A:C	rs60495863	14	88283756	C	A	0.385	0.001187	-3.242	0.992307	rs11851487	44	RP11-1152H15.1:RP11-804L24.2	00:00:00	ncRNA_intronic	NA	6	5	15
14:88284026:A:T	rs34589321	14	88284026	T	A	0.385	0.001187	-3.242	0.992307	rs11851487	44	RP11-1152H15.1:RP11-804L24.2	00:00:00	ncRNA_intronic	0.866	6	5	15
14:88284233:A:T	rs11851487	14	88284233	A	T	0.3452	8.781e-06	-4.445	1	rs11851487	44	RP11-1152H15.1:RP11-804L24.2	00:00:00	ncRNA_intronic	0.326	6	5	15
14:88284253:A:C	rs11847136	14	88284253	C	A	0.385	0.001187	-3.242	0.992307	rs11851487	44	RP11-1152H15.1:RP11-804L24.2	00:00:00	ncRNA_intronic	0.858	7	5	15
14:88284482:A:G	rs11847229	14	88284482	G	A	0.3873	0.001187	-3.242	0.984679	rs11851487	44	RP11-1152H15.1:RP11-804L24.2	00:00:00	ncRNA_intronic	1.017	7	5	15
14:88285060:C:G	rs8003778	14	88285060	C	G	0.385	0.001187	-3.242	0.992307	rs11851487	44	RP11-1152H15.1:RP11-804L24.2	00:00:00	ncRNA_intronic	0.609	5	1	15
14:88285234:A:G	rs8003555	14	88285234	G	A	0.385	0.001252	-3.227	0.973049	rs11851487	44	RP11-1152H15.1:RP11-804L24.2	00:00:00	ncRNA_intronic	0.751	5	5	15
14:88286403:G:T	rs12885815	14	88286403	G	T	0.388	0.002808	-2.988	0.939349	rs11851487	44	RP11-1152H15.1:RP11-804L24.2	00:00:00	ncRNA_intronic	NA	7	5	15
14:88286529:A:G	rs12884672	14	88286529	G	A	0.388	0.002808	-2.988	0.946856	rs11851487	44	RP11-1152H15.1:RP11-804L24.2	00:00:00	ncRNA_intronic	0.973	6	5	15
16:6067412:C:T	rs73522136	16	6067412	T	C	0.1324	2.114e-05	-4.252	0.974098	rs77506474	45	RP11-420N3.2	0	ncRNA_intronic	14.45	5	9	14
16:6068251:A:G	rs77506474	16	6068251	G	A	0.1339	6.677e-06	-4.504	1	rs77506474	45	RP11-420N3.2	0	ncRNA_intronic	1.508	5	8	13
16:6069280:A:G	rs73522138	16	6069280	A	G	0.1301	7.235e-06	-4.487	0.954902	rs77506474	45	RP11-420N3.2:RBFOX1	00:00:00	ncRNA_intronic	21.2	4	1	13
16:78725080:A:G	rs74032742	16	78725080	G	A	0.05825	2.257e-06	-4.729	1	rs74032742	46	WWOX	0	intronic	5.684	6	5	15
18:8640869:A:G	rs12956397	18	8640869	G	A	0.1778	0.000352	-3.574	0.635599	rs11663276	47	RAB12	1489	intergenic	2.619	7	4	5
18:8641331:A:G	rs9949325	18	8641331	G	A	0.1581	9.59e-06	-4.426	0.629812	rs11663276	47	RAB12	1951	intergenic	0.674	7	4	5
18:8642003:C:T	rs2016466	18	8642003	T	C	0.1399	1.341e-05	-4.353	0.693814	rs11663276	47	RAB12	2623	intergenic	2.305	NA	4	5
18:8642189:C:G	rs744866	18	8642189	C	G	0.149	2.331e-05	-4.231	0.646527	rs11663276	47	RAB12	2809	intergenic	0.483	7	4	5
18:8643302:C:T	rs9958259	18	8643302	C	T	0.174	5.11e-05	-4.051	0.71979	rs11663276	47	RAB12	3922	intergenic	1.545	5	5	15
18:8644258:C:G	rs9748279	18	8644258	C	G	0.1551	2.963e-05	-4.176	0.618359	rs11663276	47	RAB12	4878	intergenic	0.007	6	5	15
18:8645907:C:T	rs2160909	18	8645907	T	C	0.1331	5.005e-06	-4.565	0.713197	rs11663276	47	RAB12	6527	intergenic	9.784	NA	5	15
18:8647837:C:T	rs9948747	18	8647837	C	T	0.1959	5.367e-05	-4.039	0.697326	rs11663276	47	RAB12	8457	intergenic	2.518	7	5	15
18:8648368:C:T	rs9960217	18	8648368	T	C	0.1331	5.005e-06	-4.565	0.713197	rs11663276	47	RAB12	8988	intergenic	4.524	7	5	15
18:8652107:G:T	18:8652107	18	8652107	G	T	0.1634	4.714e-05	-4.069	0.655988	rs11663276	47	RAB12	12727	intergenic	8.664	6	5	15
18:8652416:C:T	rs9947386	18	8652416	C	T	0.1626	3.926e-05	-4.112	0.66047	rs11663276	47	RAB12	13036	intergenic	3.065	5	5	15
18:8652736:A:C	rs35807780	18	8652736	A	C	0.1498	1.055e-05	-4.406	0.823962	rs11663276	47	RAB12	13356	intergenic	3.644	6	5	15
18:8652809:C:T	rs9304018	18	8652809	C	T	0.1505	1.569e-06	-4.802	0.829137	rs11663276	47	RAB12	13429	intergenic	0.259	6	5	15
18:8652881:A:G	rs9304019	18	8652881	A	G	0.1513	1.569e-06	-4.802	0.823871	rs11663276	47	RAB12	13501	intergenic	1.251	7	5	15
18:8652965:A:G	rs9304020	18	8652965	A	G	0.1513	1.76e-06	-4.779	0.823871	rs11663276	47	RAB12	13585	intergenic	9.984	7	5	15
18:8652971:C:T	rs9304021	18	8652971	C	T	0.1589	3.383e-06	-4.646	0.771475	rs11663276	47	RAB12	13591	intergenic	12.25	7	5	15
18:8653957:G:T	rs11663276	18	8653957	T	G	0.1679	7.527e-07	-4.947	1	rs11663276	47	RAB12	14577	intergenic	0.667	5	2	15
18:8656961:A:C	rs9946584	18	8656961	A	C	0.1407	1.712e-05	-4.299	0.651541	rs11663276	47	RAB12	17581	intergenic	4.471	5	5	15
18:13808717:A:G	rs60637140	18	13808717	G	A	0.1067	5.359e-06	-4.55	1	rs60637140	48	AP001525.1	15196	intergenic	10.61	5	2	14
19:1778023:A:G	rs67256262	19	1778023	A	G	0.23	4.198e-06	-4.601	1	rs67256262	49	ONECUT3	0	UTR3	1.919	6	5	13
19:44530696:A:C	rs36010337	19	44530696	C	A	0.115	9.406e-06	-4.43	1	rs36010337	50	ZNF222:ZNF223	00:00:00	intronic	0.356	6	1	5
20:35300135:A:G	rs6028684	20	35300135	G	A	0.2413	1.203e-05	4.377	0.868269	rs113096000	51	NDRG3	0	intronic	0.896	7	4	5
20:35300988:G:T	rs8121868	20	35300988	T	G	0.2065	1.142e-05	4.388	0.721686	rs113096000	51	NDRG3	0	intronic	0.677	5	4	5
20:35303796:G:T	rs6513631	20	35303796	T	G	0.236	8.132e-06	4.462	0.842212	rs113096000	51	NDRG3	0	intronic	0.455	6	5	5
20:35307015:A:G	rs7261719	20	35307015	G	A	0.2413	8.132e-06	4.462	0.868269	rs113096000	51	NDRG3	0	intronic	1.641	7	4	5
20:35308104:A:G	rs6028725	20	35308104	A	G	0.2398	8.132e-06	4.462	0.853788	rs113096000	51	NDRG3	0	intronic	NA	6	4	5
20:35308843:A:G	rs113096000	20	35308843	G	A	0.267	1.115e-06	4.87	1	rs113096000	51	NDRG3	0	intronic	0.44	6	4	5
20:35309601:C:G	rs6016198	20	35309601	C	G	0.2413	8.132e-06	4.462	0.868269	rs113096000	51	NDRG3	0	intronic	NA	7	4	5
20:35319473:C:T	rs6101818	20	35319473	C	T	0.2405	6.906e-06	4.497	0.864534	rs113096000	51	NDRG3	0	intronic	1.496	7	5	5
20:35320975:A:G	rs112804534	20	35320975	G	A	0.2443	6.906e-06	4.497	0.853049	rs113096000	51	NDRG3	0	intronic	2.226	7	5	5
20:35322244:A:G	rs111711947	20	35322244	A	G	0.2413	6.906e-06	4.497	0.868269	rs113096000	51	NDRG3	0	intronic	NA	7	5	5
20:35323378:A:G	rs60705727	20	35323378	G	A	0.2057	9.597e-06	4.426	0.718317	rs113096000	51	NDRG3	0	intronic	2.464	6	4	5
20:35335891:A:G	rs1275255	20	35335891	G	A	0.2065	9.597e-06	4.426	0.721686	rs113096000	51	NDRG3	0	intronic	3.151	5	4	5
20:35341056:C:T	rs112890847	20	35341056	T	C	0.2413	6.906e-06	4.497	0.868269	rs113096000	51	NDRG3	0	intronic	1.584	7	5	5
20:35341762:C:T	rs1631651	20	35341762	T	C	0.2413	6.906e-06	4.497	0.868269	rs113096000	51	NDRG3	0	intronic	1.399	NA	5	5
20:35352922:C:T	rs1275267	20	35352922	C	T	0.261	2.183e-05	4.245	0.781184	rs113096000	51	NDRG3	0	intronic	14.63	7	5	5
20:35353779:A:G	rs1275269	20	35353779	G	A	0.261	2.183e-05	4.245	0.781184	rs113096000	51	NDRG3	0	intronic	0.568	7	5	5
20:35361489:A:G	rs1275257	20	35361489	G	A	0.2383	6.962e-06	4.495	0.839379	rs113096000	51	NDRG3	0	intronic	2.681	7	5	5
20:35362636:C:T	rs1275259	20	35362636	T	C	0.239	7.207e-06	4.487	0.835291	rs113096000	51	NDRG3	0	intronic	4.407	6	2	5
20:35367537:C:T	rs6029164	20	35367537	T	C	0.2965	0.0001064	3.876	0.689392	rs113096000	51	NDRG3	0	intronic	2.507	6	5	15
20:35372702:G:T	rs2425268	20	35372702	G	T	0.2398	7.207e-06	4.487	0.830746	rs113096000	51	NDRG3	0	intronic	6.25	5	2	15
20:35373223:C:T	rs1782475	20	35373223	C	T	0.2405	7.207e-06	4.487	0.83451	rs113096000	51	NDRG3	0	intronic	0.484	NA	1	7
20:35384734:A:G	rs78454987	20	35384734	A	G	0.1959	9.73e-06	4.423	0.647455	rs113096000	51	DSN1	0	intronic	1.976	7	4	5
20:35385487:C:T	rs2425275	20	35385487	C	T	0.2398	6.662e-06	4.504	0.831225	rs113096000	51	DSN1	0	intronic	0.066	5	2	5
20:35387536:C:T	rs2425276	20	35387536	C	T	0.2428	6.662e-06	4.504	0.81632	rs113096000	51	DSN1	0	intronic	0.955	7	4	5
20:35388369:A:G	rs2425277	20	35388369	G	A	0.2405	7.467e-06	4.48	0.83451	rs113096000	51	DSN1	0	intronic	1.414	7	4	5
20:35389587:C:T	rs2425278	20	35389587	C	T	0.1952	8.95e-06	4.441	0.64408	rs113096000	51	DSN1	0	intronic	0.759	3a	3	5
20:35395618:G:T	rs2425281	20	35395618	G	T	0.2375	7.839e-06	4.47	0.820462	rs113096000	51	DSN1	0	intronic	NA	6	4	5
20:35397901:C:T	rs2425282	20	35397901	C	T	0.2413	7.207e-06	4.487	0.808627	rs113096000	51	DSN1	0	intronic	4.151	5	2	5
20:35400776:C:T	rs2425284	20	35400776	C	T	0.2398	7.207e-06	4.487	0.830746	rs113096000	51	DSN1	0	intronic	1.694	7	5	5
20:35401299:C:G	rs2425285	20	35401299	G	C	0.2247	4.136e-06	4.604	0.747719	rs113096000	51	DSN1	0	intronic	3.893	4	1	2
20:35407817:A:G	rs2425289	20	35407817	A	G	0.2322	1.376e-05	4.348	0.790273	rs113096000	51	SOGA1	0	UTR3	3.753	5	2	5
20:35412834:A:G	rs2298308	20	35412834	A	G	0.2912	0.0009603	3.302	0.643337	rs113096000	51	SOGA1	0	UTR3	7.575	NA	4	4
20:35417854:C:T	rs2425292	20	35417854	C	T	0.2368	7.207e-06	4.487	0.803754	rs113096000	51	SOGA1	0	intronic	1.903	7	4	5
20:35417896:C:T	rs2425293	20	35417896	C	T	0.2368	7.207e-06	4.487	0.803754	rs113096000	51	SOGA1	0	intronic	1.909	6	4	5
20:35418762:C:T	rs8118134	20	35418762	C	T	0.2368	7.207e-06	4.487	0.803754	rs113096000	51	SOGA1	0	intronic	8.265	7	4	5
20:35425246:C:G	rs2425299	20	35425246	G	C	0.2277	1.265e-05	4.366	0.756113	rs113096000	51	SOGA1	0	intronic	1.631	5	4	4
20:35431831:A:G	20:35431831	20	35431831	G	A	0.2421	9.511e-06	4.428	0.793051	rs113096000	51	SOGA1	0	intronic	6.439	5	4	4
20:35433414:A:G	rs2425303	20	35433414	G	A	0.211	7.365e-06	4.483	0.683978	rs113096000	51	SOGA1	0	intronic	0.736	5	4	4
20:35433702:C:T	rs2425304	20	35433702	C	T	0.2421	9.511e-06	4.428	0.793051	rs113096000	51	SOGA1	0	intronic	3.848	5	4	4
20:56157341:A:G	rs6025645	20	56157341	A	G	0.4191	1.564e-06	4.803	1	rs6025645	52	PCK1	15827	intergenic	8.528	4	1	14
20:56157549:A:G	rs6015037	20	56157549	A	G	0.4682	7.424e-06	-4.481	1	rs6015037	52	PCK1	16035	intergenic	3.672	2b	1	14
20:56159276:C:T	rs6513317	20	56159276	C	T	0.3669	0.001533	-3.168	0.615201	rs6015037	52	RP4-718J7.4	15474	intergenic	3.353	4	5	14
21:20455408:C:T	rs57246606	21	20455408	C	T	0.2784	2.281e-06	-4.727	0.984591	rs9982779	53	AP000431.1	35404	intergenic	2.123	7	9	15
21:20455886:C:T	rs9976292	21	20455886	T	C	0.2784	2.281e-06	-4.727	0.984591	rs9982779	53	AP000431.1	35882	intergenic	3.564	7	9	15
21:20459913:G:T	rs9982779	21	20459913	T	G	0.2799	2.281e-06	-4.727	1	rs9982779	53	AP000431.1	39909	intergenic	0.157	6	9	15
21:20464033:C:G	rs76436022	21	20464033	C	G	0.2776	2.466e-06	-4.711	0.988471	rs9982779	53	AP000431.2	38807	intergenic	0.099	7	9	15
21:20465974:C:G	rs116592867	21	20465974	G	C	0.2806	2.695e-06	-4.693	0.973144	rs9982779	53	AP000431.2	36866	intergenic	1.344	6	9	15
21:20467128:C:T	rs9974870	21	20467128	C	T	0.2806	3.24e-06	-4.655	0.973144	rs9982779	53	AP000431.2	35712	intergenic	0.629	7	9	15
21:22433492:C:T	rs9680264	21	22433492	T	C	0.1944	7.884e-05	-3.948	0.63387	rs9680265	54	NCAM2	0	intronic	3.031	7	5	15
21:22433493:A:G	rs9680272	21	22433493	G	A	0.2057	0.0001969	-3.723	0.608671	rs9680265	54	NCAM2	0	intronic	4.082	7	5	15
21:22433521:C:T	rs9680265	21	22433521	T	C	0.2277	9.939e-06	-4.418	1	rs9680265	54	NCAM2	0	intronic	3.29	6	5	15
22:21442319:A:C	rs111752108	22	21442319	A	C	0.05295	3.003e-06	-4.671	1	rs111752108	55	BCRP2	14985	intergenic	6.844	7	5	15
22:27831347:C:T	rs13058149	22	27831347	T	C	0.4947	6.485e-06	4.51	1	rs13058149	56	RP11-46E17.6	21860	intergenic	0.739	5	5	15
22:48984237:A:G	rs73425956	22	48984237	A	G	0.1293	3.785e-06	-4.623	1	rs73425956	57	FAM19A5	0	intronic	0.861	5	5	15

## Sheet: SuppTable_2b_FuncAnnNav
Supplementary Table 2b. Functional annotation for suggestive SNPs associated with Gene-Smoking interaction for cIMT in Navrongo sample
Note: ANNOVAR = functional variant classification based on position in or outside of a gene; CADD = Combined Annotation-Dependent depletion score, a marker of deleteriousness of SNP's effect on a protein product (higher scores are more deleterious); RDB = RegulomeDB scores, which predict likelihood that a SNP has a regulatory role (lower scores are more likely); minChrState = minimum chromatin st…
uniqID	rsID	chr	pos	non_effect_allele	effect_allele	MAF	gwasP	beta	r2	IndSigSNP	GenomicLocus	nearestGene	dist	func	CADD	RDB	minChrState	commonChrState
1:102039804:G:T	rs12743305	1	102039804	T	G	0.1384	2.72e-06	-4.691	1	rs12743305	1	RP11-411H5.1	149493	intergenic	0.977	7	14	15
1:102039854:A:G	rs7549104	1	102039854	A	G	0.1218	5.868e-06	-4.531	0.806978	rs12743305	1	RP11-411H5.1	149443	intergenic	1.322	7	14	15
1:102039858:A:T	rs7538987	1	102039858	T	A	0.1195	5.868e-06	-4.531	0.800584	rs12743305	1	RP11-411H5.1	149439	intergenic	2.622	7	14	15
1:158643513:A:G	rs378557	1	158643513	A	G	0.08926	2.789e-05	-4.19	0.671092	rs452108	2	SPTA1	0	intronic	4.222	NA	4	15
1:158644105:A:T	rs703116	1	158644105	A	T	0.09002	2.789e-05	-4.19	0.667035	rs452108	2	SPTA1	0	intronic	5.617	5	4	15
1:158648490:C:T	rs325993	1	158648490	C	T	0.09607	4.926e-05	-4.059	0.673087	rs452108	2	SPTA1	0	intronic	NA	7	4	15
1:158649464:C:T	rs703124	1	158649464	C	T	0.09304	2.93e-05	-4.179	0.695548	rs452108	2	SPTA1	0	intronic	0.13	NA	4	15
1:158649921:A:G	rs413514	1	158649921	G	A	0.09304	2.93e-05	-4.179	0.695548	rs452108	2	SPTA1	0	intronic	3.907	6	4	15
1:158653709:A:G	rs857936	1	158653709	A	G	0.09304	2.001e-05	-4.265	0.695548	rs452108	2	SPTA1	0	intronic	2.489	NA	3	15
1:158655840:C:T	rs390718	1	158655840	T	C	0.09531	5.278e-05	-4.043	0.693017	rs452108	2	SPTA1	0	intronic	9.039	5	1	15
1:158658484:C:T	rs857942	1	158658484	T	C	0.09455	5.29e-05	-4.042	0.699251	rs452108	2	SPTA1	1995	intergenic	0.054	NA	5	15
1:158668141:G:T	rs703129	1	158668141	T	G	0.09304	6.998e-05	-3.976	0.709826	rs452108	2	OR6K2	1227	intergenic	0.504	NA	14	15
1:158670763:G:T	rs703131	1	158670763	T	G	0.09607	3.754e-05	-4.122	0.684438	rs452108	2	OR6K2	276	upstream	0.721	NA	14	15
1:158672353:C:T	rs2427805	1	158672353	C	T	0.0938	9.417e-06	-4.43	0.703343	rs452108	2	OR6K2	1866	intergenic	0.566	5	9	15
1:158696300:A:G	rs857924	1	158696300	A	G	0.08472	9.186e-06	-4.436	0.850965	rs452108	2	OR6K4P	1397	intergenic	2.39	6	5	15
1:158716549:A:C	rs452108	1	158716549	A	C	0.0938	3.169e-06	-4.66	1	rs452108	2	OR6K5P	3343	intergenic	2.337	6	5	15
2:150390155:C:T	rs78380843	2	150390155	T	C	0.05673	3.734e-06	-4.626	1	rs78380843	3	MMADHC	35992	intergenic	2.775	7	14	15
2:150390760:C:G	rs77831436	2	150390760	G	C	0.05749	3.734e-06	-4.626	1	rs77831436	3	MMADHC	35387	intergenic	2.68	6	13	15
4:108724898:C:T	rs59483727	4	108724898	C	T	0.09985	8.924e-06	4.442	1	rs59483727	4	SGMS2	20820	intergenic	2.286	6	5	15
5:38907814:C:T	rs73751809	5	38907814	T	C	0.1346	0.0003072	3.609	0.605385	rs62352637	5	OSMR	0	intronic	2.491	5	4	4
5:38910178:C:T	rs56289397	5	38910178	T	C	0.1006	9.022e-06	4.439	0.977053	rs62352637	5	OSMR	0	intronic	2.092	5	4	5
5:38910765:A:T	rs72732730	5	38910765	T	A	0.1513	0.001176	3.245	0.602426	rs62352637	5	OSMR	0	intronic	3.263	6	4	5
5:38912972:C:T	rs62352637	5	38912972	C	T	0.1029	9.022e-06	4.439	1	rs62352637	5	OSMR	0	intronic	1.793	7	5	15
5:38921198:A:T	rs10075572	5	38921198	T	A	0.1528	0.002321	3.046	0.633647	rs62352637	5	OSMR	0	intronic	0.874	5	4	15
5:38922398:A:G	rs2278330	5	38922398	A	G	0.1536	0.002321	3.046	0.622716	rs62352637	5	OSMR	0	intronic	6.669	2b	4	15
6:130781638:C:T	rs6908852	6	130781638	C	T	0.4251	4.588e-06	4.583	1	rs6908852	6	TMEM200A	17429	intergenic	3.418	7	5	15
6:130782038:A:C	rs6929556	6	130782038	C	A	0.4448	3.069e-05	4.168	0.770499	rs6908852	6	TMEM200A	17829	intergenic	2.423	6	5	15
6:130783120:A:G	rs9492599	6	130783120	G	A	0.4652	1.803e-05	4.288	0.729248	rs6908852	6	TMEM200A	18911	intergenic	1.91	5	5	15
6:130787061:A:G	rs6928109	6	130787061	A	G	0.4455	3.829e-05	4.118	0.720562	rs6908852	6	TMEM200A	22852	intergenic	20.3	5	5	15
6:153994951:C:T	rs4296898	6	153994951	T	C	0.1059	2.802e-06	-4.685	1	rs4869800	7	MTND4P13	3914	intergenic	3.153	7	9	15
6:154002533:A:G	rs4869800	6	154002533	G	A	0.1059	1.923e-06	-4.761	1	rs4869800	7	RNU6-896P	48	upstream	1.766	6	9	15
6:154005364:A:C	rs2350395	6	154005364	C	A	0.1059	2.442e-06	-4.713	1	rs4869800	7	RNU6-896P	2675	intergenic	0.565	6	9	15
6:154011024:C:T	rs2000371	6	154011024	C	T	0.07489	0.0006625	-3.405	0.664785	rs4869800	7	RNU6-896P	8335	intergenic	0.051	NA	9	15
6:154023391:C:T	6:154023391	6	154023391	T	C	0.07489	0.0006625	-3.405	0.664785	rs4869800	7	RNU6-896P	20702	intergenic	2.849	5	9	15
6:154024534:C:T	rs2186139	6	154024534	T	C	0.07489	0.0006625	-3.405	0.664785	rs4869800	7	RNU6-896P	21845	intergenic	6.719	NA	9	15
6:154034142:C:T	rs7762495	6	154034142	C	T	0.07489	0.001106	-3.262	0.664785	rs4869800	7	RNU6-896P	31453	intergenic	0.267	6	9	15
6:154039364:C:T	rs2350398	6	154039364	C	T	0.07489	0.0008764	-3.327	0.664785	rs4869800	7	RNU6-896P	36675	intergenic	9.013	6	15	15
6:154040245:G:T	rs9371726	6	154040245	T	G	0.07489	0.0008764	-3.327	0.664785	rs4869800	7	RNU6-896P	37556	intergenic	0.639	7	15	15
6:154040272:A:G	rs9371727	6	154040272	A	G	0.07489	0.0008764	-3.327	0.664785	rs4869800	7	RNU6-896P	37583	intergenic	0.39	7	15	15
6:154042733:G:T	rs4464811	6	154042733	T	G	0.07564	0.0008764	-3.327	0.656892	rs4869800	7	RNU6-896P	40044	intergenic	0.736	6	9	15
6:154043665:A:G	rs9371729	6	154043665	G	A	0.07489	0.0008764	-3.327	0.664785	rs4869800	7	RNU6-896P	40976	intergenic	0.59	7	9	15
6:154046247:A:G	rs6939855	6	154046247	A	G	0.07489	0.0008764	-3.327	0.664785	rs4869800	7	RNU6-896P	43558	intergenic	2.549	5	2	15
6:154050597:C:T	rs2000370	6	154050597	T	C	0.07413	0.002865	-2.982	0.610482	rs4869800	7	RNU6-896P	47908	intergenic	0.14	NA	15	15
6:154081678:C:T	rs4870222	6	154081678	C	T	0.07413	0.001834	-3.116	0.610482	rs4869800	7	RNU6-896P	78989	intergenic	1.816	5	9	15
6:163128672:G:T	rs2849522	6	163128672	G	T	0.1422	0.02962	2.175	0.648293	rs2849519	8	PARK2	0	intronic	3.523	NA	5	15
6:163128901:C:G	rs2849521	6	163128901	G	C	0.143	0.02962	2.175	0.652508	rs2849519	8	PARK2	0	intronic	8.312	7	5	15
6:163132372:C:T	rs2849519	6	163132372	T	C	0.2035	6.23e-06	4.518	1	rs2849519	8	PARK2	0	intronic	2.223	NA	5	15
6:163139050:C:G	rs2849511	6	163139050	G	C	0.143	0.02792	2.198	0.652508	rs2849519	8	PARK2	0	intronic	2.642	7	5	15
6:163142618:A:C	rs2803085	6	163142618	C	A	0.143	0.02613	2.224	0.652508	rs2849519	8	PARK2	0	intronic	1.252	NA	5	15
7:154107706:A:T	rs10262856	7	154107706	T	A	0.05371	8.517e-05	-3.929	0.725073	rs79668927	9	DPP6	0	intronic	4.698	6	5	15
7:154114710:C:T	rs79668927	7	154114710	C	T	0.07413	4.145e-06	-4.604	1	rs79668927	9	DPP6	0	intronic	1.209	7	5	15
7:154115307:C:G	rs28695976	7	154115307	C	G	0.07413	4.145e-06	-4.604	1	rs79668927	9	DPP6	0	intronic	0.231	7	5	15
7:154116796:A:G	rs10249437	7	154116796	A	G	0.05295	5.532e-05	-4.032	0.735892	rs79668927	9	DPP6	0	intronic	0.946	7	5	15
7:154118117:C:T	rs10256536	7	154118117	T	C	0.07489	7.231e-06	-4.487	0.99023	rs79668927	9	DPP6	0	intronic	1.616	6	5	15
7:154118200:C:T	rs10256649	7	154118200	T	C	0.06884	4.561e-06	-4.584	0.912132	rs79668927	9	DPP6	0	intronic	2.039	7	5	15
7:154119225:C:G	rs12333949	7	154119225	C	G	0.05371	3.633e-05	-4.13	0.725073	rs79668927	9	DPP6	0	intronic	0.692	7	5	15
7:154120424:A:G	rs79933156	7	154120424	G	A	0.05371	3.633e-05	-4.13	0.725073	rs79668927	9	DPP6	0	intronic	1.492	5	5	15
9:12043812:A:G	rs59522150	9	12043812	A	G	0.05295	2.675e-06	-4.694	1	rs59522150	10	RP11-74C3.1	54847	intergenic	0.062	7	9	15
9:20914358:A:C	rs116544389	9	20914358	C	A	0.06884	7.121e-06	-4.49	1	rs116544389	11	FOCAD	0	intronic	0.074	6	4	5
9:20938571:C:G	rs200065432	9	20938571	G	C	0.112	0.0012	-3.239	0.600889	rs116544389	11	FOCAD	0	intronic	NA	7	5	5
9:21099991:A:G	rs10964835	9	21099991	A	G	0.357	7.033e-06	4.493	1	rs10964835	11	IFNWP4	6550	intergenic	0.218	7	5	15
9:21100141:C:T	rs10964836	9	21100141	T	C	0.3389	7.603e-06	4.476	0.901118	rs10964835	11	IFNWP4	6400	intergenic	2.026	7	5	15
9:21100619:A:G	rs10964837	9	21100619	A	G	0.3366	1.164e-05	4.384	0.910818	rs10964835	11	IFNWP4	5922	intergenic	1.211	6	5	15
9:21100743:A:G	rs10964838	9	21100743	A	G	0.3654	7.891e-06	4.468	0.796413	rs10964835	11	IFNWP4	5798	intergenic	0.347	6	5	15
9:133407956:C:T	rs11793060	9	133407956	C	T	0.07262	6.28e-06	-4.517	1	rs11793060	12	ASS1	31294	intergenic	3.511	5	5	14
10:307530:A:G	rs142094210	10	307530	A	G	0.05068	0.0007042	3.388	0.700075	rs76252315	13	ZMYND11	6952	intergenic	0.674	7	5	5
10:329130:C:G	rs17158883	10	329130	G	C	0.06051	1.047e-05	4.407	0.920895	rs76252315	13	DIP2C	0	intronic	1.781	5	4	4
10:331536:A:G	rs114002811	10	331536	A	G	0.06127	1.047e-05	4.407	0.934226	rs76252315	13	DIP2C	0	intronic	0.086	5	4	4
10:332177:A:G	rs114068665	10	332177	G	A	0.06051	1.047e-05	4.407	0.946901	rs76252315	13	DIP2C	0	intronic	1.643	5	4	5
10:332290:A:G	rs17158977	10	332290	G	A	0.06051	1.047e-05	4.407	0.946901	rs76252315	13	DIP2C	0	intronic	6.084	5	4	5
10:336676:C:T	rs114746180	10	336676	T	C	0.06354	2.47e-05	4.218	0.923102	rs76252315	13	DIP2C	0	intronic	2.421	5	4	5
10:337277:A:G	rs116081154	10	337277	A	G	0.06127	1.047e-05	4.407	0.960285	rs76252315	13	DIP2C	0	intronic	0.296	5	4	5
10:339521:A:G	rs116207246	10	339521	G	A	0.06127	1.047e-05	4.407	0.960285	rs76252315	13	DIP2C	0	intronic	2.134	5	5	5
10:339833:A:G	rs116702908	10	339833	A	G	0.06127	3.944e-05	4.111	0.960285	rs76252315	13	DIP2C	0	intronic	8.163	4	5	5
10:339892:A:G	rs79430764	10	339892	G	A	0.06127	3.944e-05	4.111	0.960285	rs76252315	13	DIP2C	0	intronic	1.603	4	5	5
10:346370:C:T	rs116537447	10	346370	T	C	0.06127	1.283e-05	4.363	0.934226	rs76252315	13	DIP2C	0	intronic	2.907	6	2	5
10:346798:C:T	rs143706208	10	346798	C	T	0.06127	1.283e-05	4.363	0.934226	rs76252315	13	DIP2C	0	intronic	0.36	3a	4	5
10:353688:C:T	rs115160871	10	353688	T	C	0.06203	1.283e-05	4.363	0.947602	rs76252315	13	DIP2C	0	intronic	3.989	5	4	5
10:354207:A:G	rs17159343	10	354207	A	G	0.06203	1.283e-05	4.363	0.947602	rs76252315	13	DIP2C	0	intronic	1.134	5	2	5
10:354353:C:T	rs116632280	10	354353	T	C	0.06203	1.283e-05	4.363	0.947602	rs76252315	13	DIP2C	0	intronic	0.364	4	2	5
10:360690:G:T	rs77735444	10	360690	G	T	0.06127	1.283e-05	4.363	0.960285	rs76252315	13	DIP2C	0	intronic	1.108	5	4	5
10:366365:C:T	rs190553953	10	366365	C	T	0.06051	1.283e-05	4.363	0.97327	rs76252315	13	DIP2C	0	intronic	1.116	6	4	5
10:367258:C:T	rs76252315	10	367258	C	T	0.06051	6.981e-06	4.494	1	rs76252315	13	DIP2C	0	intronic	2.05	5	4	5
10:371061:C:T	rs140241218	10	371061	C	T	0.05144	0.001537	3.168	0.712757	rs76252315	13	DIP2C	0	intronic	0.228	7	4	5
10:371264:A:G	rs114043358	10	371264	G	A	0.05219	0.0003212	3.598	0.854455	rs76252315	13	DIP2C	0	intronic	10.92	5	4	5
10:376698:A:G	rs116306407	10	376698	A	G	0.05219	0.0002874	3.626	0.854455	rs76252315	13	DIP2C	0	intronic	3.663	7	5	5
10:386735:C:T	rs116759103	10	386735	T	C	0.05295	0.000261	3.651	0.8408	rs76252315	13	DIP2C	0	intronic	5.484	5	4	4
10:408071:C:T	rs115392795	10	408071	C	T	0.05144	0.002654	3.005	0.737646	rs76252315	13	DIP2C	0	intronic	7.231	5	4	4
10:466184:A:G	10:466184	10	466184	A	G	0.05219	0.0002297	3.684	0.667213	rs74509340	13	DIP2C	0	intronic	0.833	5	4	4
10:466761:A:G	rs80213455	10	466761	A	G	0.05219	0.0001649	3.767	0.667213	rs74509340	13	DIP2C	0	intronic	3.139	2b	4	5
10:466762:A:C	rs79887299	10	466762	A	C	0.05219	0.0001649	3.767	0.667213	rs74509340	13	DIP2C	0	intronic	6.091	2b	4	5
10:477764:C:T	rs76336367	10	477764	T	C	0.05219	8.341e-05	3.934	0.6926	rs74509340	13	DIP2C	0	intronic	0.417	5	4	5
10:477915:G:T	rs75184386	10	477915	G	T	0.05219	8.341e-05	3.934	0.764472	rs74509340	13	DIP2C	0	intronic	2.894	5	4	5
10:477941:C:T	rs77471988	10	477941	T	C	0.05295	8.341e-05	3.934	0.776498	rs74509340	13	DIP2C	0	intronic	2.824	5	4	5
10:479751:A:G	rs114001186	10	479751	G	A	0.05219	8.341e-05	3.934	0.764472	rs74509340	13	DIP2C	0	intronic	1.346	7	4	5
10:480157:A:T	rs74854715	10	480157	T	A	0.05219	8.341e-05	3.934	0.764472	rs74509340	13	DIP2C	0	intronic	1.087	6	4	5
10:480196:C:T	rs76403103	10	480196	C	T	0.05219	8.341e-05	3.934	0.764472	rs74509340	13	DIP2C	0	intronic	1.587	7	4	5
10:480774:C:T	rs74509340	10	480774	C	T	0.06657	9.788e-06	4.422	1	rs74509340	13	DIP2C	0	intronic	0.031	5	2	5
10:481382:C:T	rs111634386	10	481382	C	T	0.05219	8.341e-05	3.934	0.764472	rs74509340	13	DIP2C	0	intronic	1.246	5	2	5
10:482041:A:G	rs116673686	10	482041	A	G	0.05144	8.341e-05	3.934	0.703113	rs74509340	13	DIP2C	0	intronic	0.474	5	4	5
10:482121:C:G	rs77024672	10	482121	G	C	0.05295	8.341e-05	3.934	0.751524	rs74509340	13	DIP2C	0	intronic	1.001	4	4	5
10:482194:G:T	rs112755004	10	482194	G	T	0.05295	8.341e-05	3.934	0.751524	rs74509340	13	DIP2C	0	intronic	4.21	2a	4	5
10:482491:C:T	rs112400611	10	482491	C	T	0.05068	8.341e-05	3.934	0.715683	rs74509340	13	DIP2C	0	intronic	1.274	4	4	5
10:482855:C:T	rs112334716	10	482855	T	C	0.05068	8.341e-05	3.934	0.715683	rs74509340	13	DIP2C	0	intronic	4.714	5	4	5
10:482975:A:G	rs111670151	10	482975	A	G	0.05068	8.341e-05	3.934	0.715683	rs74509340	13	DIP2C	0	intronic	0.472	5	4	5
10:484102:C:T	10:484102	10	484102	T	C	0.05295	8.341e-05	3.934	0.751524	rs74509340	13	DIP2C:RP11-490E15.2	00:00:00	ncRNA_intronic	3.025	5	4	5
10:484265:C:T	rs112209077	10	484265	C	T	0.05068	8.341e-05	3.934	0.715683	rs74509340	13	DIP2C:RP11-490E15.2	00:00:00	ncRNA_intronic	0.783	5	4	5
10:484528:C:T	rs113400740	10	484528	T	C	0.05068	8.341e-05	3.934	0.715683	rs74509340	13	DIP2C:RP11-490E15.2	00:00:00	ncRNA_intronic	3.431	6	4	5
10:484574:A:G	rs112316660	10	484574	A	G	0.05068	8.299e-05	3.936	0.715683	rs74509340	13	DIP2C:RP11-490E15.2	00:00:00	ncRNA_intronic	0.463	7	4	5
10:484796:C:G	rs113107303	10	484796	C	G	0.05219	8.341e-05	3.934	0.764472	rs74509340	13	DIP2C:RP11-490E15.2	00:00:00	ncRNA_intronic	0.432	7	4	5
10:488996:A:G	10:488996	10	488996	A	G	0.05219	8.341e-05	3.934	0.764472	rs74509340	13	DIP2C	0	intronic	1.585	6	5	5
10:489133:G:T	rs115576052	10	489133	G	T	0.05219	8.092e-05	3.942	0.764472	rs74509340	13	DIP2C	0	intronic	3.663	5	5	5
10:493095:A:C	rs142325602	10	493095	A	C	0.05219	0.0001374	3.813	0.739537	rs74509340	13	DIP2C	0	intronic	6.681	6	4	5
10:505486:C:T	rs116506073	10	505486	C	T	0.05219	0.0001374	3.813	0.739537	rs74509340	13	DIP2C	0	intronic	1.582	5	4	5
10:505628:A:C	rs116289137	10	505628	A	C	0.05144	0.0001374	3.813	0.72759	rs74509340	13	DIP2C	0	intronic	3.086	6	4	15
10:508158:C:T	rs147760057	10	508158	C	T	0.05219	0.0001374	3.813	0.739537	rs74509340	13	DIP2C	0	intronic	0.765	6	5	5
10:518811:A:G	10:518811	10	518811	A	G	0.05219	0.0001374	3.813	0.739537	rs74509340	13	DIP2C	0	intronic	3.008	4	4	5
10:521559:A:G	rs78888593	10	521559	A	G	0.05068	0.0001813	3.744	0.74054	rs74509340	13	DIP2C	0	intronic	4.021	6	4	5
10:521563:C:T	rs77096975	10	521563	C	T	0.05144	0.0001075	3.873	0.72759	rs74509340	13	DIP2C	0	intronic	0.989	7	4	5
10:522196:C:T	rs77293115	10	522196	T	C	0.05068	0.0001374	3.813	0.74054	rs74509340	13	DIP2C	0	intronic	4.43	5	4	5
10:522791:C:T	rs77931202	10	522791	C	T	0.05068	0.0001374	3.813	0.74054	rs74509340	13	DIP2C	0	intronic	2.521	5	4	5
10:522911:A:T	rs78669616	10	522911	T	A	0.07489	9.142e-05	3.912	0.832835	rs74509340	13	DIP2C	0	intronic	0.197	5	5	5
10:523042:C:T	rs78411391	10	523042	C	T	0.05068	0.0001374	3.813	0.74054	rs74509340	13	DIP2C	0	intronic	0.466	5	5	5
10:523132:A:G	rs116597773	10	523132	G	A	0.05144	0.0001374	3.813	0.72759	rs74509340	13	DIP2C	0	intronic	0.681	5	5	5
10:523797:A:G	rs115980728	10	523797	A	G	0.05446	0.01093	2.545	0.681604	rs74509340	13	DIP2C	0	intronic	2.298	6	5	5
10:524403:A:G	rs115617078	10	524403	G	A	0.05068	0.0001374	3.813	0.74054	rs74509340	13	DIP2C	0	intronic	1.433	5	4	5
10:529132:G:T	rs74368569	10	529132	G	T	0.05068	0.0001374	3.813	0.74054	rs74509340	13	DIP2C	0	intronic	4.177	5	2	5
10:532865:C:T	rs79310533	10	532865	C	T	0.05144	0.0001374	3.813	0.72759	rs74509340	13	DIP2C	0	intronic	2.109	5	2	5
10:533238:A:G	rs115690728	10	533238	G	A	0.05068	0.0001374	3.813	0.74054	rs74509340	13	DIP2C	0	intronic	5.519	7	5	5
10:535144:C:G	rs76892215	10	535144	G	C	0.05144	0.0003151	3.603	0.72759	rs74509340	13	DIP2C	0	intronic	3.193	5	2	5
10:535541:A:G	rs145472675	10	535541	G	A	0.07035	0.000338	3.584	0.755809	rs74509340	13	DIP2C	0	intronic	0.646	5	2	5
10:537139:A:C	rs114933100	10	537139	C	A	0.05295	0.002237	3.057	0.702801	rs74509340	13	DIP2C	0	intronic	1.323	4	1	7
10:538426:C:T	rs115820734	10	538426	C	T	0.05295	0.0001374	3.813	0.702801	rs74509340	13	DIP2C	0	intronic	0.729	5	5	7
10:538645:C:G	rs79950398	10	538645	G	C	0.05219	0.0001374	3.813	0.715016	rs74509340	13	DIP2C	0	intronic	0.051	5	2	7
10:539307:A:C	rs76338795	10	539307	C	A	0.05295	0.0001374	3.813	0.702801	rs74509340	13	DIP2C	0	intronic	1.12	5	5	7
10:540812:C:T	rs116007064	10	540812	T	C	0.05295	0.0004409	3.514	0.702801	rs74509340	13	DIP2C	0	intronic	3.317	7	2	5
10:541231:A:G	rs77167087	10	541231	A	G	0.05219	0.0004409	3.514	0.715016	rs74509340	13	DIP2C	0	intronic	0.17	5	5	5
10:541254:C:G	rs77465734	10	541254	C	G	0.05219	0.0004409	3.514	0.715016	rs74509340	13	DIP2C	0	intronic	0.97	5	5	5
10:542143:A:G	rs114076217	10	542143	G	A	0.05219	0.000522	3.469	0.715016	rs74509340	13	DIP2C	0	intronic	0.916	7	5	5
10:542788:C:G	rs141338512	10	542788	C	G	0.05219	0.0004259	3.523	0.715016	rs74509340	13	DIP2C	0	intronic	0.328	4	5	5
10:574863:C:T	rs79626971	10	574863	T	C	0.05749	0.00773	2.664	0.614478	rs74509340	13	DIP2C	0	intronic	0.45	7	4	15
11:11177862:C:T	rs7116836	11	11177862	C	T	0.2383	1.83e-05	4.285	0.858991	rs11043124	14	RP11-179A10.1	0	ncRNA_intronic	1.99	4	1	15
11:11178200:C:T	rs7120218	11	11178200	C	T	0.2375	1.83e-05	4.285	0.86296	rs11043124	14	RP11-179A10.1	0	ncRNA_intronic	0.699	4	2	15
11:11178203:A:G	rs7130735	11	11178203	A	G	0.2375	1.83e-05	4.285	0.86296	rs11043124	14	RP11-179A10.1	0	ncRNA_intronic	1.912	4	2	15
11:11179209:C:T	rs11604571	11	11179209	T	C	0.2368	1.83e-05	4.285	0.86695	rs11043124	14	RP11-179A10.1	0	ncRNA_intronic	2.862	5	5	15
11:11179448:A:G	rs7112661	11	11179448	A	G	0.2368	1.83e-05	4.285	0.86695	rs11043124	14	RP11-179A10.1	0	ncRNA_intronic	1.768	5	5	15
11:11184095:C:T	rs11043124	11	11184095	T	C	0.2579	3.356e-06	4.648	1	rs11043124	14	RP11-179A10.1	0	ncRNA_intronic	2.017	7	5	15
11:11184154:C:T	rs11043125	11	11184154	T	C	0.2579	3.356e-06	4.648	1	rs11043124	14	RP11-179A10.1	0	ncRNA_intronic	4.675	5	5	15
11:11184521:A:G	rs7103792	11	11184521	A	G	0.236	1.399e-05	4.344	0.893085	rs11043124	14	RP11-179A10.1	0	ncRNA_intronic	2.539	5	5	15
11:11184721:A:C	rs7105012	11	11184721	A	C	0.2648	1.522e-05	4.325	0.752612	rs11043124	14	RP11-179A10.1	0	ncRNA_intronic	5.95	5	5	15
11:11186468:A:G	rs10840592	11	11186468	A	G	0.264	1.522e-05	4.325	0.754966	rs11043124	14	RP11-179A10.1	0	ncRNA_intronic	3.262	5	5	15
11:11186717:C:T	rs10770179	11	11186717	C	T	0.2648	1.522e-05	4.325	0.752612	rs11043124	14	RP11-179A10.1	0	ncRNA_intronic	1.756	5	5	15
11:11187349:C:T	rs7105882	11	11187349	C	T	0.2648	5.008e-06	4.564	0.751673	rs11043124	14	RP11-179A10.1	0	ncRNA_intronic	14.79	6	5	15
11:11187622:C:T	rs10840593	11	11187622	C	T	0.2965	0.0001817	3.743	0.64189	rs11043124	14	RP11-179A10.1	0	ncRNA_intronic	8.228	6	5	15
11:11187991:C:T	rs10840594	11	11187991	T	C	0.2958	0.0001817	3.743	0.638578	rs11043124	14	RP11-179A10.1	0	ncRNA_intronic	4.116	7	5	15
11:11189231:C:T	rs10840599	11	11189231	T	C	0.2685	8.342e-06	4.456	0.716728	rs11043124	14	RP11-179A10.1	0	ncRNA_intronic	2.967	7	5	15
11:11189537:A:G	rs885117	11	11189537	G	A	0.2806	9.095e-06	4.438	0.672779	rs11043124	14	RP11-179A10.1	0	ncRNA_exonic	1.614	5	5	15
11:119245010:A:T	rs891290	11	119245010	A	T	0.06808	9.334e-06	-4.432	1	rs891290	15	USP2:RP11-334E6.3	00:00:00	ncRNA_intronic	7.39	4	2	7
11:119249355:A:G	rs116813686	11	119249355	G	A	0.06808	1.507e-05	-4.328	0.976811	rs891290	15	USP2:RP11-334E6.3	00:00:00	ncRNA_intronic	6.228	4	1	5
11:132031224:C:T	rs12797802	11	132031224	C	T	0.3048	6.243e-06	-4.518	1	rs12797802	16	NTM	0	intronic	2.726	5	5	15
12:59151544:A:G	rs7358623	12	59151544	G	A	0.3366	7.421e-06	-4.481	1	rs7358623	17	RP11-362K2.2:RP11-767I20.1	00:00:00	ncRNA_intronic	9.591	2b	7	15
12:115013760:A:T	rs11067175	12	115013760	A	T	0.1467	4.638e-06	-4.581	1	rs11067175	18	OSTF1P1	12238	intergenic	5.629	5	9	15
14:47817368:A:G	rs201818410	14	47817368	G	A	0.32	7.385e-06	-4.482	1	rs201818410	19	MDGA2:MDGA2	00:00:00	intronic	NA	6	5	15
14:68825191:A:C	rs11158732	14	68825191	C	A	0.4584	3.765e-06	-4.624	1	rs11158732	20	RAD51B	0	intronic	1.71	4	5	15
14:98238493:C:T	rs12890048	14	98238493	T	C	0.4077	0.000238	3.675	0.716075	rs10873486	21	RP11-204N11.1	8166	intergenic	4.02	5	5	15
14:98238500:G:T	rs8016366	14	98238500	G	T	0.4077	0.0002544	3.658	0.716075	rs10873486	21	RP11-204N11.1	8173	intergenic	4.064	5	5	15
14:98241962:C:T	rs1462267	14	98241962	T	C	0.3956	0.0001619	3.772	0.752386	rs10873486	21	RP11-204N11.2	10939	intergenic	0.287	NA	5	15
14:98246687:C:T	rs2370526	14	98246687	T	C	0.3986	0.000389	3.547	0.751545	rs10873486	21	RP11-204N11.2	6214	intergenic	0.381	7	5	15
14:98251378:C:T	rs7147178	14	98251378	C	T	0.3601	1.64e-05	4.309	0.952431	rs10873486	21	RP11-204N11.2	1523	intergenic	1.31	7	5	15
14:98251725:A:G	rs1841721	14	98251725	G	A	0.3601	1.64e-05	4.309	0.952431	rs10873486	21	RP11-204N11.2	1176	intergenic	2.251	NA	5	15
14:98251896:A:G	rs34636632	14	98251896	G	A	0.3601	1.64e-05	4.309	0.952431	rs10873486	21	RP11-204N11.2	1005	intergenic	0.31	5	5	15
14:98252182:A:T	rs61040807	14	98252182	A	T	0.3601	1.64e-05	4.309	0.952431	rs10873486	21	RP11-204N11.2	719	downstream	1.088	4	5	15
14:98252206:G:T	rs11850381	14	98252206	T	G	0.3601	1.64e-05	4.309	0.952431	rs10873486	21	RP11-204N11.2	695	downstream	0.115	3a	5	15
14:98252549:A:G	rs10782487	14	98252549	A	G	0.3601	1.64e-05	4.309	0.952431	rs10873486	21	RP11-204N11.2	352	downstream	2.38	5	5	15
14:98253622:A:T	rs1903670	14	98253622	T	A	0.3593	2.49e-05	4.216	0.949204	rs10873486	21	RP11-204N11.2	0	ncRNA_intronic	0.441	5	5	15
14:98256167:C:T	rs12433454	14	98256167	T	C	0.3056	2.156e-05	4.248	0.798021	rs10873486	21	RP11-204N11.2	573	upstream	3.228	7	5	15
14:98256752:C:T	rs10873486	14	98256752	C	T	0.3517	9.9e-06	4.419	1	rs10873486	21	RP11-204N11.2	1158	intergenic	0.472	6	5	15
14:98257476:A:G	rs12897967	14	98257476	A	G	0.3192	1.185e-05	4.38	0.789041	rs10873486	21	RP11-204N11.2	1882	intergenic	2.57	6	5	15
14:98257638:A:G	rs12898177	14	98257638	A	G	0.3525	1.152e-05	4.387	0.909439	rs10873486	21	RP11-204N11.2	2044	intergenic	3.877	6	5	15
17:40505531:A:T	rs116720528	17	40505531	A	T	0.06354	4.244e-06	-4.599	1	rs116720528	22	STAT3	0	intronic	3.089	6	5	5
17:40511103:A:G	rs150256889	17	40511103	A	G	0.06808	1.184e-05	-4.38	0.92736	rs116720528	22	STAT3	0	intronic	1.631	7	4	5
17:40556951:C:T	rs112332573	17	40556951	T	C	0.06959	1.569e-05	-4.319	0.815781	rs116720528	22	PTRF	0	exonic	17.44	5	3	4
17:40561066:C:T	rs144524854	17	40561066	C	T	0.07035	2.182e-05	-4.245	0.806142	rs116720528	22	PTRF	0	intronic	3.197	6	5	5
17:40586420:A:G	rs148522328	17	40586420	A	G	0.07716	3.41e-05	-4.144	0.668095	rs116720528	22	RNU7-97P	5795	intergenic	0.309	6	5	15
17:40617242:A:G	rs116572471	17	40617242	A	G	0.07716	1.131e-05	-4.391	0.629947	rs116720528	22	ATP6V0A1	0	intronic	2.465	7	4	5
17:40814212:A:C	rs7215170	17	40814212	C	A	0.08018	5.677e-06	-4.538	0.607977	rs116720528	22	TUBG2	0	intronic	0.188	7	4	5
17:41057064:A:G	rs147205026	17	41057064	A	G	0.09228	1.373e-05	-4.348	0.963798	rs7225801	22	G6PC	0	intronic	2.516	7	5	15
17:41060364:A:G	rs7225801	17	41060364	G	A	0.09228	6.617e-06	-4.506	1	rs7225801	22	G6PC	0	intronic	9.956	5	5	15
17:67967563:A:G	rs78751739	17	67967563	G	A	0.06657	1.013e-05	-4.414	0.909432	rs74656678	23	AC004562.1	0	ncRNA_intronic	3.077	6	5	15
17:67978826:G:T	rs114459766	17	67978826	T	G	0.06657	6.78e-06	-4.5	0.909432	rs74656678	23	AC004562.1	0	ncRNA_intronic	1.321	5	9	15
17:67987435:C:T	rs74656678	17	67987435	T	C	0.06657	2.059e-06	-4.748	1	rs74656678	23	Y_RNA	5199	intergenic	3.464	7	5	15
17:67998318:A:G	rs76707192	17	67998318	G	A	0.07035	2.634e-05	-4.203	0.94487	rs74656678	23	AC002539.1	15146	intergenic	2.15	5	5	15
17:68011022:C:T	rs79312755	17	68011022	C	T	0.07791	9.188e-06	-4.435	0.829237	rs74656678	23	AC002539.1	2442	intergenic	1.272	7	9	15
17:68023539:G:T	rs75207115	17	68023539	T	G	0.0764	7.27e-05	-3.967	0.826478	rs74656678	23	AC002539.1	0	ncRNA_intronic	2.196	5	5	15
19:4843612:A:G	rs7245961	19	4843612	G	A	0.2882	7.041e-06	4.492	1	rs7245961	24	PLIN3	0	intronic	0.187	6	4	4
20:56537517:C:G	rs16981530	20	56537517	C	G	0.05068	2.938e-06	4.675	1	rs16981530	25	RP13-379L11.2	2800	intergenic	0.644	6	5	15
20:56537631:C:T	rs2865436	20	56537631	T	C	0.05068	4.213e-06	4.601	1	rs16981530	25	RP13-379L11.2	2914	intergenic	3.97	5	5	15

## Sheet: SuppTable_2c_FuncAnnAll
Supplementary Table 2c. Functional annotation for suggestive SNPs associated with Gene-Smoking interaction for cIMT in the combined sample
Note: ANNOVAR = functional variant classification based on position in or outside of a gene; CADD = Combined Annotation-Dependent depletion score, a marker of deleteriousness of SNP's effect on a protein product (higher scores are more deleterious); RDB = RegulomeDB scores, which predict likelihood that a SNP has a regulatory role (lower scores are more likely); minChrState = minimum chromatin st…
SNP	CHR	BP	Allele1	Allele2	N	Zscore	P	EAF_HRC	minINFO	GenomicLocus	nearestGene	Gene Distance	ANNOVAR category	CADD	RDB	minChrState	commonChrState	leadSNP
	SNP	CHR	BP	Allele1	Allele2			Zscore
uniqID	rsID	chr	pos	non_effect_allele	effect_allele	MAF	gwasP	beta	r2	IndSigSNP	GenomicLocus	nearestGene	Gene Distance	ANNOVAR category	CADD	RDB	minChrState	commonChrState
1:6502548:C:T	rs6685095	1	6502548	T	C	0.1225	6.225e-06	-4.519	1	rs6685095	1	ESPN	0	intronic	0.23	7	5	14
1:6505671:A:G	rs11121879	1	6505671	A	G	0.1256	9.623e-06	-4.425	0.943614	rs6685095	1	ESPN:RP1-202O8.2	00:00:00	ncRNA_exonic	6.113	4	1	14
1:55487648:A:G	rs11588151	1	55487648	G	A	0.1074	6.216e-06	-4.519	1	rs11588151	2	BSND	11091	intergenic	4.877	4	2	14
1:115052507:C:T	rs112736146	1	115052507	C	T	0.1195	4.285e-05	-4.092	0.658833	rs74115213	3	TRIM33	0	intronic	7.401	2b	1	2
1:115054290:G:T	rs74115213	1	115054290	G	T	0.09834	9.022e-06	-4.439	1	rs74115213	3	TRIM33	508	upstream	0.187	2b	1	1
2:101816286:C:T	rs77461169	2	101816286	C	T	0.05446	4.482e-06	-4.588	1	rs77461169	4	TBC1D8	0	NA	0.895	5	5	15
2:101821934:C:T	rs1192824	2	101821934	T	C	0.3381	5.902e-09	5.82	1	rs1192824	4	TBC1D8	0	NA	4.838	5	1	15
2:138748302:C:T	rs12991332	2	138748302	C	T	0.05598	2.486e-06	4.709	1	rs12991332	5	HNMT	0	intronic	1.04	5	4	15
2:189842214:A:G	rs73047627	2	189842214	A	G	0.05976	4.265e-06	4.598	1	rs73047627	6	COL3A1	0	intronic	4.056	5	1	15
2:200578867:C:T	rs1357582	2	200578867	C	T	0.2035	0.004319	-2.854	0.620967	rs11695675	7	FTCDNL1	46399	intergenic	0.501	6	14	15
2:200579502:A:G	rs4673435	2	200579502	A	G	0.2035	0.0006159	-3.425	0.620967	rs11695675	7	FTCDNL1	45764	intergenic	4.718	7	14	15
2:200582952:C:T	rs4500928	2	200582952	T	C	0.2027	0.003763	-2.897	0.669928	rs11695675	7	FTCDNL1	42314	intergenic	6.782	4	5	15
2:200590047:A:G	rs12477383	2	200590047	A	G	0.205	0.003342	-2.934	0.661465	rs11695675	7	FTCDNL1	35219	intergenic	6.741	7	14	15
2:200598114:C:T	rs1996948	2	200598114	T	C	0.2057	0.001884	-3.108	0.679613	rs11695675	7	FTCDNL1	27152	intergenic	1.665	NA	13	15
2:200603517:C:G	rs4672548	2	200603517	C	G	0.1974	1.441e-05	-4.338	0.76616	rs11695675	7	FTCDNL1	21749	intergenic	3.472	2a	2	15
2:200607333:A:G	rs11695675	2	200607333	A	G	0.1831	3.484e-07	-5.095	1	rs11695675	7	FTCDNL1	17933	intergenic	2.997	7	5	15
2:200612911:A:G	rs11685147	2	200612911	G	A	0.2042	0.0001367	-3.814	0.869731	rs11695675	7	FTCDNL1	12355	intergenic	1.897	5	5	15
2:200625581:C:T	rs2346586	2	200625581	C	T	0.1263	6.219e-05	-4.004	0.646836	rs11695675	7	FTCDNL1	0	intronic	4.768	4	5	15
2:200626678:A:G	rs11687699	2	200626678	A	G	0.1233	2.767e-05	-4.192	0.621745	rs11695675	7	FTCDNL1	0	intronic	2.933	7	5	15
2:230569546:G:T	rs12473075	2	230569546	T	G	0.1725	0.003681	2.904	0.73236	rs12465362	8	DNER	0	intronic	NA	7	5	14
2:230569590:G:T	rs12473885	2	230569590	T	G	0.233	0.02349	2.265	0.686089	rs12465362	8	DNER	0	intronic	0.991	7	5	14
2:230569862:A:G	rs12465803	2	230569862	G	A	0.1725	0.00374	2.899	0.73236	rs12465362	8	DNER	0	intronic	3.371	7	5	14
2:230569989:C:G	rs12474029	2	230569989	C	G	0.1974	0.00128	3.22	0.857356	rs12465362	8	DNER	0	intronic	1.194	7	5	14
2:230572019:A:G	rs4972912	2	230572019	A	G	0.1725	0.003014	2.966	0.73236	rs12465362	8	DNER	0	intronic	1.736	6	4	14
2:230575319:A:G	rs4331494	2	230575319	G	A	0.2292	0.0002542	3.658	0.915642	rs12465362	8	DNER	0	intronic	0.739	7	5	14
2:230576660:C:T	2:230576660	2	230576660	T	C	0.2163	0.0001771	3.75	0.978719	rs12465362	8	DNER	0	intronic	1.749	5	2	13
2:230576990:C:T	rs57461282	2	230576990	T	C	0.2163	0.0001771	3.75	0.978719	rs12465362	8	DNER	0	intronic	6.286	4	2	13
2:230577506:A:C	rs73097225	2	230577506	A	C	0.2163	0.0001771	3.75	0.978719	rs12465362	8	DNER	0	intronic	3.162	5	1	13
2:230577590:A:T	rs73097226	2	230577590	A	T	0.2163	0.0001771	3.75	0.978719	rs12465362	8	DNER	0	intronic	4.597	5	1	13
2:230577753:A:T	rs73097229	2	230577753	A	T	0.1914	0.0002314	3.682	0.842553	rs12465362	8	DNER	0	intronic	9.801	2b	1	13
2:230577822:A:G	rs73097231	2	230577822	A	G	0.2163	0.0001771	3.75	0.978719	rs12465362	8	DNER	0	intronic	4.127	4	1	13
2:230577873:A:G	rs73097232	2	230577873	G	A	0.2156	0.0001771	3.75	0.982925	rs12465362	8	DNER	0	intronic	7.886	2b	1	13
2:230577905:A:C	rs73097236	2	230577905	A	C	0.2156	0.0001771	3.75	0.982925	rs12465362	8	DNER	0	intronic	3.853	3a	1	13
2:230578100:C:T	rs73097239	2	230578100	T	C	0.2163	0.0001771	3.75	0.978719	rs12465362	8	DNER	0	intronic	8.066	2b	1	13
2:230578348:G:T	rs73097243	2	230578348	G	T	0.2156	0.0001771	3.75	0.982925	rs12465362	8	DNER	0	intronic	8.822	4	1	12
2:230578400:C:T	rs73097244	2	230578400	T	C	0.2156	0.0001771	3.75	0.982925	rs12465362	8	DNER	0	intronic	9.406	2b	1	12
2:230578612:A:G	rs79825726	2	230578612	G	A	0.2148	0.0002196	3.695	0.978601	rs12465362	8	DNER	0	intronic	8.285	4	1	11
2:230578648:C:T	rs73097248	2	230578648	T	C	0.2148	0.0002196	3.695	0.978601	rs12465362	8	DNER	0	intronic	11.78	4	1	11
2:230579016:A:G	rs11552881	2	230579016	A	G	0.2156	0.0001771	3.75	0.982925	rs12465362	8	DNER	0	exonic	5.945	NA	1	10
2:230579283:C:G	rs6707837	2	230579283	C	G	0.2156	0.0001771	3.75	0.982925	rs12465362	8	DNER	8	upstream	17.39	3a	1	10
2:230579375:C:T	rs6723161	2	230579375	C	T	0.2156	0.0001771	3.75	0.982925	rs12465362	8	DNER	100	upstream	4.323	2b	1	10
2:230579572:C:T	rs6723387	2	230579572	C	T	0.2156	0.0001771	3.75	0.982925	rs12465362	8	DNER	297	upstream	8.081	4	1	11
2:230579782:C:G	rs55711925	2	230579782	G	C	0.2156	0.0001771	3.75	0.982925	rs12465362	8	DNER	507	upstream	8.589	2b	1	11
2:230580086:A:G	rs55649986	2	230580086	A	G	0.2156	0.0001771	3.75	0.982925	rs12465362	8	DNER	811	upstream	8.246	4	1	12
2:230580167:C:T	rs77914893	2	230580167	C	T	0.2148	0.0001771	3.75	0.978601	rs12465362	8	DNER	892	upstream	1.074	4	1	12
2:230580169:C:T	rs79479971	2	230580169	T	C	0.2148	0.0001771	3.75	0.978601	rs12465362	8	DNER	894	upstream	7.084	2b	1	12
2:230580271:G:T	rs56304857	2	230580271	T	G	0.2156	0.0001771	3.75	0.982925	rs12465362	8	DNER	996	upstream	5.449	5	1	13
2:230580382:C:T	rs6712018	2	230580382	T	C	0.2156	0.0001771	3.75	0.982925	rs12465362	8	DNER	1107	intergenic	4.717	5	1	13
2:230580522:A:G	rs6740633	2	230580522	G	A	0.2156	0.0001986	3.721	0.982925	rs12465362	8	DNER	1247	intergenic	3.548	2b	1	13
2:230580544:A:T	rs6727427	2	230580544	A	T	0.2156	0.0001771	3.75	0.982925	rs12465362	8	DNER	1269	intergenic	11.32	4	1	13
2:230581088:G:T	rs75317625	2	230581088	G	T	0.2156	0.0001771	3.75	0.982925	rs12465362	8	DNER	1813	intergenic	12.88	6	5	14
2:230581133:A:T	rs73097259	2	230581133	T	A	0.2156	0.0001771	3.75	0.982925	rs12465362	8	DNER	1858	intergenic	0.879	7	5	14
2:230581342:C:T	rs10933310	2	230581342	C	T	0.2163	0.0001771	3.75	0.978719	rs12465362	8	DNER	2067	intergenic	0.935	5	5	14
2:230581849:G:T	rs10804353	2	230581849	G	T	0.1914	0.0002907	3.623	0.842553	rs12465362	8	DNER	2574	intergenic	3.982	6	5	14
2:230582146:A:G	rs4973221	2	230582146	A	G	0.2163	0.0001503	3.791	0.978719	rs12465362	8	DNER	2871	intergenic	5.346	5	5	14
2:230582359:C:G	rs4973222	2	230582359	G	C	0.2042	5.355e-05	4.04	0.919539	rs12465362	8	DNER	3084	intergenic	1.596	7	5	14
2:230582774:A:G	rs2273999	2	230582774	A	G	0.2156	0.0001503	3.791	0.982925	rs12465362	8	DNER	3499	intergenic	9.245	7	5	14
2:230583332:A:T	rs12468714	2	230583332	T	A	0.2156	9.665e-05	3.899	0.982925	rs12465362	8	DNER	4057	intergenic	1.233	7	5	14
2:230583713:A:G	rs10804354	2	230583713	A	G	0.2156	9.665e-05	3.899	0.982925	rs12465362	8	DNER	4438	intergenic	0.73	6	5	14
2:230584289:A:C	rs58537385	2	230584289	C	A	0.2156	9.665e-05	3.899	0.982925	rs12465362	8	DNER	5014	intergenic	4.493	6	5	14
2:230585244:A:G	rs55764490	2	230585244	A	G	0.2042	0.0003288	3.591	0.910492	rs12465362	8	DNER	5969	intergenic	3.559	4	7	14
2:230586066:C:T	rs112723122	2	230586066	C	T	0.2156	9.046e-05	3.915	0.982925	rs12465362	8	DNER	6791	intergenic	1.3	7	5	14
2:230586411:A:G	rs73097273	2	230586411	A	G	0.2156	9.046e-05	3.915	0.982925	rs12465362	8	DNER	7136	intergenic	0.231	7	5	14
2:230586761:A:G	rs73097276	2	230586761	A	G	0.1914	0.000386	3.549	0.842553	rs12465362	8	DNER	7486	intergenic	1.524	6	5	14
2:230586906:A:G	rs73097277	2	230586906	A	G	0.3101	0.001766	3.127	0.612046	rs12465362	8	DNER	7631	intergenic	4.252	6	5	14
2:230586944:C:T	rs73097280	2	230586944	C	T	0.2156	0.000103	3.884	0.982925	rs12465362	8	DNER	7669	intergenic	3.438	6	5	14
2:230587448:G:T	rs12465362	2	230587448	T	G	0.2126	7.627e-06	4.475	1	rs12465362	8	DNER	8173	intergenic	NA	5	5	14
2:230587794:A:T	rs6750660	2	230587794	T	A	0.2133	7.627e-06	4.475	0.995694	rs12465362	8	DNER	8519	intergenic	0.851	7	5	15
2:230588396:C:T	rs6723005	2	230588396	T	C	0.2753	3.097e-05	4.166	0.70768	rs12465362	8	DNER	9121	intergenic	0.065	7	5	15
2:230588482:A:T	rs6738246	2	230588482	A	T	0.2753	3.097e-05	4.166	0.721016	rs12465362	8	DNER	9207	intergenic	2.901	7	5	15
2:230588503:A:G	rs6751529	2	230588503	G	A	0.2753	3.097e-05	4.166	0.721016	rs12465362	8	DNER	9228	intergenic	1.775	7	5	15
2:230588734:C:T	rs10188786	2	230588734	C	T	0.2761	3.421e-05	4.143	0.718437	rs12465362	8	DNER	9459	intergenic	0.676	7	5	15
3:12511478:A:G	rs76884483	3	12511478	A	G	0.1135	0.007287	2.683	0.698791	rs7619102	9	TSEN2	14452	intergenic	0.389	7	5	15
3:12512161:A:G	rs141460640	3	12512161	A	G	0.1135	0.007145	2.69	0.698791	rs7619102	9	TSEN2	13769	intergenic	0.427	6	5	15
3:12513046:C:T	rs3896042	3	12513046	T	C	0.1135	0.007145	2.69	0.698791	rs7619102	9	TSEN2	12884	intergenic	6.039	NA	2	15
3:12513433:A:G	rs114314650	3	12513433	G	A	0.1135	0.006387	2.727	0.698791	rs7619102	9	TSEN2	12497	intergenic	0.09	7	5	15
3:12514495:C:T	rs56821308	3	12514495	T	C	0.1142	0.005027	2.805	0.704317	rs7619102	9	TSEN2	11435	intergenic	4.546	5	5	15
3:12515158:A:G	rs116163545	3	12515158	G	A	0.1142	0.002316	3.046	0.704317	rs7619102	9	TSEN2	10772	intergenic	21.6	5	5	15
3:12515379:C:T	rs78936140	3	12515379	T	C	0.1142	0.002316	3.046	0.704317	rs7619102	9	TSEN2	10551	intergenic	5.046	5	5	15
3:12516490:C:G	rs58297751	3	12516490	C	G	0.1248	0.01405	2.456	0.648427	rs7619102	9	TSEN2	9440	intergenic	0.97	5	5	15
3:12516665:C:G	rs60575063	3	12516665	G	C	0.1135	0.001686	3.141	0.733668	rs7619102	9	TSEN2	9265	intergenic	1.457	7	5	15
3:12516935:A:G	rs79791382	3	12516935	A	G	0.1142	0.002036	3.085	0.727517	rs7619102	9	TSEN2	8995	intergenic	1.774	4	5	15
3:12518823:A:G	rs77502793	3	12518823	A	G	0.1135	0.002036	3.085	0.733668	rs7619102	9	TSEN2	7107	intergenic	2.673	5	5	15
3:12518958:C:T	3:12518958	3	12518958	T	C	0.1142	0.000776	3.361	0.727517	rs7619102	9	TSEN2	6972	intergenic	6.635	5	5	15
3:12519002:C:T	rs17036795	3	12519002	C	T	0.1203	0.0008496	3.336	0.69341	rs7619102	9	TSEN2	6928	intergenic	5.371	5	5	15
3:12519269:A:G	rs7633806	3	12519269	G	A	0.1188	0.0008496	3.336	0.703401	rs7619102	9	TSEN2	6661	intergenic	0.992	5	5	15
3:12519544:C:G	rs7612119	3	12519544	G	C	0.1188	0.0008496	3.336	0.703401	rs7619102	9	TSEN2	6386	intergenic	1.742	7	5	15
3:12519759:C:G	rs7612545	3	12519759	C	G	0.1188	0.0008496	3.336	0.703401	rs7619102	9	TSEN2	6171	intergenic	7.563	6	5	15
3:12519821:C:T	rs114145288	3	12519821	C	T	0.1188	0.0008496	3.336	0.703401	rs7619102	9	TSEN2	6109	intergenic	1.214	5	5	15
3:12519903:A:T	rs114599261	3	12519903	T	A	0.1188	0.0008496	3.336	0.703401	rs7619102	9	TSEN2	6027	intergenic	0.091	5	5	15
3:12520018:C:T	rs77795093	3	12520018	T	C	0.1188	0.0008496	3.336	0.703401	rs7619102	9	TSEN2	5912	intergenic	7.62	5	5	15
3:12520708:C:T	rs146601411	3	12520708	T	C	0.1127	0.0006947	3.392	0.739892	rs7619102	9	TSEN2	5222	intergenic	0.116	7	5	15
3:12520864:A:T	rs116224658	3	12520864	A	T	0.1188	0.0008496	3.336	0.703401	rs7619102	9	TSEN2	5066	intergenic	1.511	7	5	15
3:12522353:C:T	rs41335647	3	12522353	C	T	0.1127	0.0006947	3.392	0.739892	rs7619102	9	TSEN2	3577	intergenic	1.854	NA	5	5
3:12525837:C:T	rs7614565	3	12525837	T	C	0.1127	0.0006744	3.4	0.739892	rs7619102	9	TSEN2	93	upstream	7.386	4	1	1
3:12528404:G:T	rs76231340	3	12528404	T	G	0.1127	0.0005773	3.442	0.739892	rs7619102	9	TSEN2	0	intronic	0.505	5	2	5
3:12529601:C:T	rs77674902	3	12529601	C	T	0.1127	0.0005773	3.442	0.739892	rs7619102	9	TSEN2	0	intronic	2.613	5	4	5
3:12532328:G:T	rs78819736	3	12532328	T	G	0.1135	0.0008317	3.342	0.733668	rs7619102	9	TSEN2	0	intronic	2.092	5	2	4
3:12532961:A:G	rs115508420	3	12532961	A	G	0.1135	0.0006744	3.4	0.734675	rs7619102	9	TSEN2	0	intronic	NA	6	4	5
3:12536180:A:G	rs138419255	3	12536180	G	A	0.1127	0.0007654	3.365	0.739892	rs7619102	9	TSEN2	0	intronic	3.932	5	4	5
3:12537754:A:G	rs7613355	3	12537754	G	A	0.1127	0.0007713	3.363	0.739892	rs7619102	9	TSEN2	0	intronic	7.84	5	4	4
3:12539317:A:G	rs6772384	3	12539317	G	A	0.1127	0.0007713	3.363	0.739892	rs7619102	9	TSEN2	0	intronic	3.112	7	4	4
3:12540469:C:G	rs116735681	3	12540469	C	G	0.1127	0.0008108	3.349	0.739892	rs7619102	9	TSEN2	0	intronic	10.66	7	4	4
3:12540752:C:G	rs80237133	3	12540752	C	G	0.1127	0.0007713	3.363	0.739892	rs7619102	9	TSEN2	0	intronic	9.812	7	4	4
3:12546764:A:G	rs78943415	3	12546764	A	G	0.1112	0.0006744	3.4	0.73979	rs7619102	9	TSEN2	0	intronic	3.99	7	4	4
3:12547208:A:G	rs138173185	3	12547208	A	G	0.112	0.0006744	3.4	0.74619	rs7619102	9	TSEN2	0	intronic	0.925	6	4	5
3:12549311:C:T	rs116427087	3	12549311	C	T	0.112	0.0006744	3.4	0.74619	rs7619102	9	TSEN2	0	intronic	1.729	2b	2	5
3:12550509:A:G	3:12550509	3	12550509	A	G	0.112	0.000888	3.324	0.74619	rs7619102	9	TSEN2	0	intronic	3.394	7	2	5
3:12550693:A:T	rs114477133	3	12550693	A	T	0.112	0.000888	3.324	0.74619	rs7619102	9	TSEN2	0	intronic	3.926	6	4	5
3:12550780:A:G	rs115554124	3	12550780	G	A	0.112	0.000888	3.324	0.74619	rs7619102	9	TSEN2	0	intronic	0.899	6	4	5
3:12551752:C:T	rs116508655	3	12551752	T	C	0.112	0.000888	3.324	0.74619	rs7619102	9	TSEN2	0	intronic	0.464	5	4	5
3:12553933:C:T	rs17036870	3	12553933	T	C	0.112	0.000888	3.324	0.74619	rs7619102	9	TSEN2	0	intronic	0.016	5	4	5
3:12563030:A:G	rs60053345	3	12563030	A	G	0.112	0.0004616	3.502	0.74619	rs7619102	9	TSEN2:C3orf83	00:00:00	intronic	0.52	7	4	5
3:12582779:A:G	rs139771883	3	12582779	G	A	0.1112	0.0008649	3.331	0.752564	rs7619102	9	C3orf83	0	intronic	2.33	7	4	5
3:12586165:C:T	rs142990637	3	12586165	T	C	0.1112	0.0008649	3.331	0.752564	rs7619102	9	C3orf83	0	intronic	0.453	5	1	5
3:12591404:C:G	rs6800984	3	12591404	G	C	0.1112	0.0008649	3.331	0.752564	rs7619102	9	C3orf83	0	intergenic	9.569	5	5	15
3:12598618:C:T	rs149385056	3	12598618	T	C	0.1339	0.0005175	3.472	0.930151	rs7619102	9	C3orf83:MKRN2	00:00:00	UTR5	9.652	4	1	1
3:12598898:A:G	rs115614926	3	12598898	G	A	0.1339	0.0005175	3.472	0.930151	rs7619102	9	C3orf83:MKRN2	00:00:00	intronic	6.105	4	1	1
3:12599328:C:T	rs116200211	3	12599328	T	C	0.1339	0.0005175	3.472	0.930151	rs7619102	9	C3orf83:MKRN2	00:00:00	intronic	5.769	3a	1	1
3:12599360:A:G	rs74763449	3	12599360	A	G	0.1339	0.0005175	3.472	0.930151	rs7619102	9	C3orf83:MKRN2	00:00:00	intronic	8.818	3a	1	1
3:12604863:A:C	rs78898469	3	12604863	A	C	0.1362	0.0003566	3.57	0.924333	rs7619102	9	MKRN2	0	intronic	6.252	4	5	5
3:12609048:C:T	rs7637892	3	12609048	T	C	0.1339	0.0003566	3.57	0.930151	rs7619102	9	MKRN2	0	intronic	2.299	6	4	5
3:12613129:C:G	rs17036929	3	12613129	C	G	0.1354	0.000354	3.572	0.930135	rs7619102	9	MKRN2	0	intronic	NA	7	4	4
3:12615368:C:G	rs138059081	3	12615368	C	G	0.1346	0.0005053	3.478	0.936406	rs7619102	9	MKRN2	0	intronic	0.312	7	4	4
3:12615610:C:T	rs6798729	3	12615610	T	C	0.1415	0.0004777	3.493	0.884629	rs7619102	9	MKRN2	0	intronic	5.995	7	4	4
3:12615864:G:T	rs1961633	3	12615864	T	G	0.1354	0.0005053	3.478	0.930135	rs7619102	9	MKRN2	0	intronic	2.883	5	4	4
3:12640745:G:T	rs5746229	3	12640745	T	G	0.1399	7.228e-05	3.969	0.968421	rs7619102	9	RAF1	0	intronic	3.696	NA	4	4
3:12651816:A:T	rs17037004	3	12651816	A	T	0.1407	9.417e-05	3.905	0.962277	rs7619102	9	RAF1	0	intronic	4.634	6	4	4
3:12651888:A:G	rs79931259	3	12651888	A	G	0.1407	9.417e-05	3.905	0.962277	rs7619102	9	RAF1	0	intronic	1.913	7	4	4
3:12654331:A:T	rs6786546	3	12654331	T	A	0.1407	9.417e-05	3.905	0.962277	rs7619102	9	RAF1	0	intronic	1.662	5	4	5
3:12654823:A:G	rs13073921	3	12654823	A	G	0.1891	0.0003166	3.601	0.656633	rs7619102	9	RAF1	0	intronic	0.447	5	4	5
3:12655025:A:G	rs17037024	3	12655025	G	A	0.1407	9.417e-05	3.905	0.962277	rs7619102	9	RAF1	0	intronic	6.141	5	4	5
3:12664512:A:T	rs115387621	3	12664512	T	A	0.1392	9.417e-05	3.905	0.974624	rs7619102	9	RAF1	0	intronic	0.215	6	5	5
3:12666207:C:G	rs78607297	3	12666207	C	G	0.1399	9.417e-05	3.905	0.96871	rs7619102	9	RAF1	0	intronic	0.084	7	5	5
3:12683952:A:C	rs9799212	3	12683952	C	A	0.1884	0.0001954	3.725	0.650764	rs7619102	9	RAF1	0	intronic	0.204	7	5	5
3:12692014:A:G	rs5746162	3	12692014	A	G	0.1407	4.972e-05	4.057	0.962277	rs7619102	9	RAF1	0	intronic	0.476	NA	2	5
3:12692953:G:T	rs57673535	3	12692953	G	T	0.1407	4.972e-05	4.057	0.962277	rs7619102	9	RAF1	0	intronic	1.134	7	4	5
3:12695048:A:C	rs13076484	3	12695048	C	A	0.1891	0.0002006	3.718	0.656633	rs7619102	9	RAF1	0	intronic	1.032	5	5	5
3:12700951:A:G	rs115962305	3	12700951	A	G	0.1407	4.972e-05	4.057	0.962277	rs7619102	9	RAF1	0	intronic	4.679	2b	1	7
3:12701430:A:T	rs114435754	3	12701430	A	T	0.1407	4.972e-05	4.057	0.962277	rs7619102	9	RAF1	0	intronic	9.733	5	1	7
3:12702099:C:T	rs145682667	3	12702099	T	C	0.1407	5.784e-05	4.021	0.962277	rs7619102	9	RAF1	0	intronic	10.16	2b	2	7
3:12713226:C:T	rs113512926	3	12713226	T	C	0.1407	3.743e-05	4.123	0.962277	rs7619102	9	CRIP1P1	1971	intergenic	0.216	5	5	15
3:12717429:A:G	rs79947087	3	12717429	G	A	0.1407	2.832e-05	4.187	0.974832	rs7619102	9	CRIP1P1	2046	intergenic	1.456	5	2	15
3:12718993:A:G	rs74381605	3	12718993	G	A	0.1407	2.647e-05	4.202	0.974832	rs7619102	9	CRIP1P1	3610	intergenic	0.11	7	2	15
3:12719537:A:G	rs76041245	3	12719537	A	G	0.1596	0.0001355	3.816	0.842719	rs7619102	9	CRIP1P1	4154	intergenic	4.274	5	1	15
3:12721425:A:G	rs17037135	3	12721425	G	A	0.1498	2.569e-05	4.209	0.907522	rs7619102	9	CRIP1P1	6042	intergenic	0.74	4	5	15
3:12728045:A:G	rs7619102	3	12728045	A	G	0.1377	7.65e-06	4.475	1	rs7619102	9	CRIP1P1	12662	intergenic	0.266	7	5	15
3:12739846:A:G	rs115105987	3	12739846	A	G	0.1377	1.302e-05	4.36	1	rs7619102	9	CRIP1P1	24463	intergenic	1.725	7	5	15
3:12755852:C:T	rs142545697	3	12755852	T	C	0.1354	1.032e-05	4.41	0.882936	rs7619102	9	TMEM40	19171	intergenic	2.096	6	5	15
3:12778599:A:G	rs7635799	3	12778599	A	G	0.1566	3.516e-05	4.137	0.741119	rs7619102	9	TMEM40	0	intronic	2.084	5	4	15
3:12831589:A:G	rs150690044	3	12831589	A	G	0.118	0.0009196	3.314	0.604697	rs7619102	9	KRT18P17	1418	intergenic	0.221	6	5	15
3:12833280:A:G	rs115262735	3	12833280	G	A	0.1157	0.0009196	3.314	0.621096	rs7619102	9	KRT18P17	3109	intergenic	1.753	6	5	15
3:24347800:C:T	rs869785	3	24347800	C	T	0.2368	5.002e-05	4.056	0.726468	rs869784	10	THRB	0	intronic	15.05	NA	2	15
3:24348008:C:T	rs869784	3	24348008	C	T	0.3018	6.569e-06	4.507	1	rs869784	10	THRB	0	intronic	1.521	NA	5	15
3:24350811:A:G	rs9310736	3	24350811	G	A	0.2421	0.0001712	3.758	0.684575	rs869784	10	THRB	0	intronic	6.193	7	5	15
3:24355634:C:T	rs1505297	3	24355634	C	T	0.3873	4.011e-05	4.107	0.639188	rs869784	10	THRB	0	intronic	12.72	NA	4	15
3:69552204:A:G	rs9834968	3	69552204	G	A	0.06203	7.453e-06	4.48	1	rs9834968	11	FRMD4B	0	intronic	1.013	7	5	15
3:69573754:G:T	rs76451161	3	69573754	T	G	0.06505	2.092e-05	4.255	0.904629	rs9834968	11	FRMD4B	0	intronic	1.385	7	4	15
3:127315788:A:C	rs2720262	3	127315788	C	A	0.4622	0.0001187	3.849	0.613464	rs782444	12	TPRA1	0	intronic	1.414	NA	5	5
3:127332011:A:G	rs782431	3	127332011	G	A	0.4554	0.000255	3.657	0.614793	rs782444	12	MCM2	0	intronic	1.774	NA	4	4
3:127333832:A:T	rs2630213	3	127333832	T	A	0.4584	0.000255	3.657	0.610645	rs782444	12	MCM2	0	intronic	1.999	5	2	5
3:127403018:C:T	rs782448	3	127403018	T	C	0.4138	0.0001805	3.745	0.868533	rs782444	12	ABTB1	3249	intergenic	0.073	NA	5	5
3:127405898:C:G	rs813634	3	127405898	G	C	0.4607	1.418e-05	-4.341	0.947101	rs782444	12	MGLL	2010	intergenic	1.539	5	5	5
3:127408239:A:G	rs7578	3	127408239	A	G	0.447	4.785e-06	4.574	0.996777	rs782444	12	MGLL	0	UTR3	8.971	NA	4	7
3:127409941:C:T	rs782444	3	127409941	C	T	0.4478	4.318e-06	4.595	1	rs782444	12	MGLL	0	UTR3	2.817	4	2	7
3:127410915:C:T	rs814131	3	127410915	T	C	0.4478	1.464e-05	4.334	1	rs782444	12	MGLL	0	UTR3	7.384	NA	4	5
3:127411436:C:T	rs812156	3	127411436	T	C	0.447	1.464e-05	4.334	0.996777	rs782444	12	MGLL	0	intronic	9.044	NA	4	5
4:40556609:C:G	rs76169119	4	40556609	G	C	0.05295	3.202e-06	4.657	1	rs76169119	13	RBM47	0	intronic	2.17	5	1	15
5:107938080:C:G	rs79340769	5	107938080	G	C	0.08094	0.0005691	-3.446	0.66994	rs77655815	14	RP11-120B7.1	8411	intergenic	6.854	5	14	15
5:107950880:C:T	rs79414964	5	107950880	T	C	0.05976	3.44e-06	-4.643	0.93589	rs77655815	14	RP11-120B7.1	21211	intergenic	0.497	7	2	15
5:107952834:A:T	rs77655815	5	107952834	A	T	0.06354	1.056e-06	-4.881	1	rs77655815	14	RP11-120B7.1	23165	intergenic	2.942	6	5	15
5:148831133:C:T	rs17653932	5	148831133	T	C	0.1399	8.571e-05	3.928	0.798586	rs10454990	15	MIR145	18735	intergenic	11.47	5	5	7
5:148831420:C:T	rs34891817	5	148831420	T	C	0.1475	0.0003289	3.591	0.763911	rs10454990	15	MIR145	19022	intergenic	4.098	6	2	7
5:148834296:C:T	rs2088453	5	148834296	C	T	0.1354	1.144e-05	4.388	0.9938	rs10454990	15	MIR145	21898	intergenic	0.949	NA	5	5
5:148834657:A:C	rs2400859	5	148834657	A	C	0.1354	1.144e-05	4.388	0.9938	rs10454990	15	MIR145	22259	intergenic	3.325	6	5	5
5:148834935:A:C	rs729319	5	148834935	A	C	0.1354	1.144e-05	4.388	0.9938	rs10454990	15	MIR145	22537	intergenic	12.18	NA	2	15
5:148836328:A:G	rs2009974	5	148836328	A	G	0.1354	9.602e-06	4.426	0.9938	rs10454990	15	MIR145	23930	intergenic	0.217	NA	2	15
5:148838117:C:T	rs10454990	5	148838117	T	C	0.1362	5.166e-06	4.558	1	rs10454990	15	MIR145	25719	intergenic	6.059	5	5	15
6:169725827:A:G	rs62435247	6	169725827	G	A	0.388	2.298e-06	4.725	1	rs62435247	16	XXyac-YX65C7_A.4	27772	intergenic	4.497	6	5	15
6:169726479:C:T	rs9379343	6	169726479	C	T	0.4123	0.0001015	3.887	0.761217	rs62435247	16	XXyac-YX65C7_A.4	28424	intergenic	2.394	5	2	15
6:169726667:C:T	rs9505962	6	169726667	T	C	0.5	0.00023	3.684	0.614115	rs62435247	16	XXyac-YX65C7_A.4	28612	intergenic	6.436	4	5	15
6:169726841:A:T	rs9406321	6	169726841	T	A	0.4115	7.225e-05	3.969	0.802722	rs62435247	16	XXyac-YX65C7_A.4	28786	intergenic	2.441	4	5	15
6:169729242:C:T	rs9379332	6	169729242	C	T	0.3177	2.818e-05	4.188	0.739325	rs62435247	16	XXyac-YX65C7_A.4	31187	intergenic	1.162	6	5	15
7:154476372:A:G	rs62475193	7	154476372	A	G	0.0711	1.648e-06	-4.792	1	rs62475193	17	DPP6	0	intronic	2.792	5	5	15
8:126648227:C:G	rs73338657	8	126648227	G	C	0.2534	8.444e-06	-4.454	1	rs16900766	18	RP11-136O12.2	94611	intergenic	1.881	4	2	15
8:126648484:A:G	rs60074719	8	126648484	G	A	0.2534	8.296e-06	-4.457	1	rs16900766	18	RP11-136O12.2	94868	intergenic	3.371	2b	2	15
8:126648806:C:T	rs16900764	8	126648806	C	T	0.2534	8.296e-06	-4.457	1	rs16900766	18	RP11-136O12.2	95190	intergenic	4.172	5	2	15
8:126649041:A:G	rs16900766	8	126649041	G	A	0.2534	8.296e-06	-4.457	1	rs16900766	18	RP11-136O12.2	95425	intergenic	4.2	5	2	15
8:126649098:A:C	rs56883151	8	126649098	A	C	0.2534	8.616e-06	-4.449	1	rs16900766	18	RP11-136O12.2	95482	intergenic	7.454	5	2	15
8:126649240:C:T	rs59352476	8	126649240	T	C	0.2557	8.296e-06	-4.457	0.988332	rs16900766	18	RP11-136O12.2	95624	intergenic	7.951	3a	2	7
8:126649511:C:T	rs16900768	8	126649511	C	T	0.2405	5.295e-05	-4.042	0.904819	rs16900766	18	RP11-136O12.2	95895	intergenic	5.629	4	2	7
8:126649545:A:G	rs16900769	8	126649545	A	G	0.2141	0.0001263	-3.834	0.806273	rs16900766	18	RP11-136O12.2	95929	intergenic	6.907	4	2	7
8:126649582:A:G	rs16900770	8	126649582	A	G	0.211	0.0001294	-3.828	0.786275	rs16900766	18	RP11-136O12.2	95966	intergenic	3.366	2b	2	7
10:466184:A:G	10:466184	10	466184	A	G	0.05219	0.00013	3.826	0.667213	rs74509340	19	DIP2C	0	intronic	0.833	5	4	4
10:466761:A:G	rs80213455	10	466761	A	G	0.05219	0.0001168	3.853	0.667213	rs74509340	19	DIP2C	0	intronic	3.139	2b	4	5
10:466762:A:C	rs79887299	10	466762	A	C	0.05219	0.0001168	3.853	0.667213	rs74509340	19	DIP2C	0	intronic	6.091	2b	4	5
10:477764:C:T	rs76336367	10	477764	T	C	0.05219	5.893e-05	4.017	0.6926	rs74509340	19	DIP2C	0	intronic	0.417	5	4	5
10:477915:G:T	rs75184386	10	477915	G	T	0.05219	6.881e-05	3.98	0.764472	rs74509340	19	DIP2C	0	intronic	2.894	5	4	5
10:477941:C:T	rs77471988	10	477941	T	C	0.05295	6.881e-05	3.98	0.776498	rs74509340	19	DIP2C	0	intronic	2.824	5	4	5
10:479751:A:G	rs114001186	10	479751	G	A	0.05219	6.881e-05	3.98	0.764472	rs74509340	19	DIP2C	0	intronic	1.346	7	4	5
10:480157:A:T	rs74854715	10	480157	T	A	0.05219	6.881e-05	3.98	0.764472	rs74509340	19	DIP2C	0	intronic	1.087	6	4	5
10:480196:C:T	rs76403103	10	480196	C	T	0.05219	6.881e-05	3.98	0.764472	rs74509340	19	DIP2C	0	intronic	1.587	7	4	5
10:480774:C:T	rs74509340	10	480774	C	T	0.06657	7.97e-07	4.936	1	rs74509340	19	DIP2C	0	intronic	0.031	5	2	5
10:481382:C:T	rs111634386	10	481382	C	T	0.05219	6.881e-05	3.98	0.764472	rs74509340	19	DIP2C	0	intronic	1.246	5	2	5
10:482041:A:G	rs116673686	10	482041	A	G	0.05144	6.881e-05	3.98	0.703113	rs74509340	19	DIP2C	0	intronic	0.474	5	4	5
10:482121:C:G	rs77024672	10	482121	G	C	0.05295	6.881e-05	3.98	0.751524	rs74509340	19	DIP2C	0	intronic	1.001	4	4	5
10:482194:G:T	rs112755004	10	482194	G	T	0.05295	6.881e-05	3.98	0.751524	rs74509340	19	DIP2C	0	intronic	4.21	2a	4	5
10:482491:C:T	rs112400611	10	482491	C	T	0.05068	6.881e-05	3.98	0.715683	rs74509340	19	DIP2C	0	intronic	1.274	4	4	5
10:482855:C:T	rs112334716	10	482855	T	C	0.05068	6.881e-05	3.98	0.715683	rs74509340	19	DIP2C	0	intronic	4.714	5	4	5
10:482975:A:G	rs111670151	10	482975	A	G	0.05068	6.881e-05	3.98	0.715683	rs74509340	19	DIP2C	0	intronic	0.472	5	4	5
10:484102:C:T	10:484102	10	484102	T	C	0.05295	6.881e-05	3.98	0.751524	rs74509340	19	DIP2C:RP11-490E15.2	00:00:00	ncRNA_intronic	3.025	5	4	5
10:484265:C:T	rs112209077	10	484265	C	T	0.05068	6.881e-05	3.98	0.715683	rs74509340	19	DIP2C:RP11-490E15.2	00:00:00	ncRNA_intronic	0.783	5	4	5
10:484528:C:T	rs113400740	10	484528	T	C	0.05068	6.881e-05	3.98	0.715683	rs74509340	19	DIP2C:RP11-490E15.2	00:00:00	ncRNA_intronic	3.431	6	4	5
10:484574:A:G	rs112316660	10	484574	A	G	0.05068	4.456e-05	4.082	0.715683	rs74509340	19	DIP2C:RP11-490E15.2	00:00:00	ncRNA_intronic	0.463	7	4	5
10:484796:C:G	rs113107303	10	484796	C	G	0.05219	6.881e-05	3.98	0.764472	rs74509340	19	DIP2C:RP11-490E15.2	00:00:00	ncRNA_intronic	0.432	7	4	5
10:488996:A:G	10:488996	10	488996	A	G	0.05219	6.881e-05	3.98	0.764472	rs74509340	19	DIP2C	0	intronic	1.585	6	5	5
10:489133:G:T	rs115576052	10	489133	G	T	0.05219	3.455e-05	4.141	0.764472	rs74509340	19	DIP2C	0	intronic	3.663	5	5	5
10:493095:A:C	rs142325602	10	493095	A	C	0.05219	0.0006128	3.426	0.739537	rs74509340	19	DIP2C	0	intronic	6.681	6	4	5
10:505486:C:T	rs116506073	10	505486	C	T	0.05219	0.0005189	3.471	0.739537	rs74509340	19	DIP2C	0	intronic	1.582	5	4	5
10:505628:A:C	rs116289137	10	505628	A	C	0.05144	0.0005189	3.471	0.72759	rs74509340	19	DIP2C	0	intronic	3.086	6	4	15
10:508158:C:T	rs147760057	10	508158	C	T	0.05219	0.0005189	3.471	0.739537	rs74509340	19	DIP2C	0	intronic	0.765	6	5	5
10:518811:A:G	10:518811	10	518811	A	G	0.05219	0.000498	3.482	0.739537	rs74509340	19	DIP2C	0	intronic	3.008	4	4	5
10:521559:A:G	rs78888593	10	521559	A	G	0.05068	0.0005051	3.478	0.74054	rs74509340	19	DIP2C	0	intronic	4.021	6	4	5
10:521563:C:T	rs77096975	10	521563	C	T	0.05144	0.0004252	3.524	0.72759	rs74509340	19	DIP2C	0	intronic	0.989	7	4	5
10:522196:C:T	rs77293115	10	522196	T	C	0.05068	0.000498	3.482	0.74054	rs74509340	19	DIP2C	0	intronic	4.43	5	4	5
10:522791:C:T	rs77931202	10	522791	C	T	0.05068	0.000498	3.482	0.74054	rs74509340	19	DIP2C	0	intronic	2.521	5	4	5
10:522911:A:T	rs78669616	10	522911	T	A	0.07489	9.38e-05	3.906	0.832835	rs74509340	19	DIP2C	0	intronic	0.197	5	5	5
10:523042:C:T	rs78411391	10	523042	C	T	0.05068	0.000498	3.482	0.74054	rs74509340	19	DIP2C	0	intronic	0.466	5	5	5
10:523132:A:G	rs116597773	10	523132	G	A	0.05144	0.0004135	3.531	0.72759	rs74509340	19	DIP2C	0	intronic	0.681	5	5	5
10:523797:A:G	rs115980728	10	523797	A	G	0.05446	0.04042	2.049	0.681604	rs74509340	19	DIP2C	0	intronic	2.298	6	5	5
10:524403:A:G	rs115617078	10	524403	G	A	0.05068	0.0004135	3.531	0.74054	rs74509340	19	DIP2C	0	intronic	1.433	5	4	5
10:529132:G:T	rs74368569	10	529132	G	T	0.05068	0.0004135	3.531	0.74054	rs74509340	19	DIP2C	0	intronic	4.177	5	2	5
10:532865:C:T	rs79310533	10	532865	C	T	0.05144	0.000408	3.535	0.72759	rs74509340	19	DIP2C	0	intronic	2.109	5	2	5
10:533238:A:G	rs115690728	10	533238	G	A	0.05068	0.0004135	3.531	0.74054	rs74509340	19	DIP2C	0	intronic	5.519	7	5	5
10:535144:C:G	rs76892215	10	535144	G	C	0.05144	0.0005753	3.443	0.72759	rs74509340	19	DIP2C	0	intronic	3.193	5	2	5
10:535541:A:G	rs145472675	10	535541	G	A	0.07035	0.0003739	3.558	0.755809	rs74509340	19	DIP2C	0	intronic	0.646	5	2	5
10:537139:A:C	rs114933100	10	537139	C	A	0.05295	0.003742	2.899	0.702801	rs74509340	19	DIP2C	0	intronic	1.323	4	1	7
10:538426:C:T	rs115820734	10	538426	C	T	0.05295	0.0003599	3.568	0.702801	rs74509340	19	DIP2C	0	intronic	0.729	5	5	7
10:538645:C:G	rs79950398	10	538645	G	C	0.05219	0.0003599	3.568	0.715016	rs74509340	19	DIP2C	0	intronic	0.051	5	2	7
10:539307:A:C	rs76338795	10	539307	C	A	0.05295	0.0003599	3.568	0.702801	rs74509340	19	DIP2C	0	intronic	1.12	5	5	7
10:540812:C:T	rs116007064	10	540812	T	C	0.05295	0.001091	3.266	0.702801	rs74509340	19	DIP2C	0	intronic	3.317	7	2	5
10:541231:A:G	rs77167087	10	541231	A	G	0.05219	0.001091	3.266	0.715016	rs74509340	19	DIP2C	0	intronic	0.17	5	5	5
10:541254:C:G	rs77465734	10	541254	C	G	0.05219	0.001091	3.266	0.715016	rs74509340	19	DIP2C	0	intronic	0.97	5	5	5
10:542143:A:G	rs114076217	10	542143	G	A	0.05219	0.001248	3.228	0.715016	rs74509340	19	DIP2C	0	intronic	0.916	7	5	5
10:542788:C:G	rs141338512	10	542788	C	G	0.05219	0.0009946	3.292	0.715016	rs74509340	19	DIP2C	0	intronic	0.328	4	5	5
10:574863:C:T	rs79626971	10	574863	T	C	0.05749	0.01157	2.525	0.614478	rs74509340	19	DIP2C	0	intronic	0.45	7	4	15
10:71741171:C:T	rs114020277	10	71741171	C	T	0.05219	3.018e-06	4.67	1	rs114020277	20	RP11-262I2.2	13210	intergenic	1.543	6	9	9
10:71815919:A:G	rs144552991	10	71815919	A	G	0.05446	3.964e-06	4.613	1	rs144552991	20	H2AFY2	0	intronic	5.681	6	4	15
10:91991941:C:T	rs1854462	10	91991941	C	T	0.09758	9.949e-06	-4.418	1	rs1854462	21	RN7SKP143	68223	intergenic	6.93	7	5	15
10:91995070:A:T	rs114248843	10	91995070	T	A	0.09758	9.949e-06	-4.418	1	rs114248843	21	RN7SKP143	71352	intergenic	0.744	6	5	15
10:133210477:A:T	rs112148169	10	133210477	A	T	0.06203	6.255e-06	-4.518	1	rs112148169	22	TCERG1L	100492	intergenic	6.728	5	8	15
11:100421331:C:T	rs1939309	11	100421331	T	C	0.2655	2.844e-06	4.682	1	rs1939309	23	RN7SL222P	91377	intergenic	9.938	NA	5	15
11:100421428:G:T	rs1939308	11	100421428	G	T	0.2806	6.917e-06	4.496	0.922878	rs1939309	23	RN7SL222P	91280	intergenic	0.05	NA	5	15
13:84251980:C:T	rs9602258	13	84251980	T	C	0.3071	4.503e-05	4.08	0.681533	rs7492237	24	SLITRK1	199363	intergenic	3.222	7	5	15
13:84254440:A:G	rs9602260	13	84254440	G	A	0.3116	4.624e-05	4.074	0.670996	rs7492237	24	SLITRK1	196903	intergenic	2.728	6	5	15
13:84254985:A:G	rs9531489	13	84254985	A	G	0.1868	1.783e-06	4.777	0.711299	rs7492237	24	SLITRK1	196358	intergenic	2.413	6	5	15
13:84256323:A:C	rs9546478	13	84256323	A	C	0.1853	2.584e-06	4.701	0.719626	rs7492237	24	SLITRK1	195020	intergenic	2.944	6	7	15
13:84256394:C:T	rs9546479	13	84256394	C	T	0.2421	7.011e-07	4.961	0.987409	rs7492237	24	SLITRK1	194949	intergenic	0.857	5	7	15
13:84258581:C:T	rs7492237	13	84258581	T	C	0.2398	7.011e-07	4.961	1	rs7492237	24	SLITRK1	192762	intergenic	1.602	7	9	15
13:84258896:G:T	rs2329285	13	84258896	T	G	0.1853	2.584e-06	4.701	0.719626	rs7492237	24	SLITRK1	192447	intergenic	0.045	7	9	15
13:84261739:A:G	rs9531490	13	84261739	A	G	0.2186	4.879e-06	4.57	0.86907	rs7492237	24	SLITRK1	189604	intergenic	6.273	7	9	15
13:84266430:G:T	rs9546486	13	84266430	G	T	0.3268	0.0001263	3.833	0.610259	rs7492237	24	SLITRK1	184913	intergenic	2.787	5	9	15
13:84268143:A:G	rs9531491	13	84268143	A	G	0.2814	0.000341	3.582	0.617187	rs7492237	24	SLITRK1	183200	intergenic	0.241	7	9	15
13:84268156:A:G	rs17077080	13	84268156	A	G	0.326	9.257e-05	3.909	0.616862	rs7492237	24	SLITRK1	183187	intergenic	1.783	6	9	15
13:84278490:C:T	rs17077104	13	84278490	C	T	0.1853	1.954e-06	4.758	0.695773	rs7492237	24	SLITRK1	172853	intergenic	1.91	7	9	15
13:84278802:A:G	rs9602268	13	84278802	G	A	0.2784	0.0003217	3.597	0.607438	rs7492237	24	SLITRK1	172541	intergenic	1.799	7	9	15
14:40120082:C:T	rs56164440	14	40120082	C	T	0.4879	2.572e-05	4.208	0.847383	rs1546993	25	RP11-111A21.1	137097	intergenic	1.932	7	9	15
14:40121531:A:T	rs11849841	14	40121531	T	A	0.5	1.003e-05	4.417	0.824248	rs1546993	25	RP11-111A21.1	138546	intergenic	0.236	NA	8	15
14:40123072:C:T	rs970635	14	40123072	C	T	0.4939	6.853e-06	4.498	0.844801	rs1546993	25	RP11-111A21.1	140087	intergenic	1.02	6	9	15
14:40127424:C:G	rs145477910	14	40127424	C	G	0.4955	1.555e-05	4.321	0.839824	rs1546993	25	RP11-111A21.1	144439	intergenic	0.153	7	9	15
14:40132382:A:G	rs7140640	14	40132382	G	A	0.4879	2.092e-05	4.255	0.842065	rs1546993	25	RP11-111A21.1	149397	intergenic	4.351	7	9	15
14:40133126:A:G	rs17109559	14	40133126	G	A	0.4932	3.579e-05	4.133	0.865124	rs1546993	25	RP11-111A21.1	150141	intergenic	6.251	5	9	15
14:40133821:G:T	rs7148846	14	40133821	G	T	0.4947	3.145e-05	4.163	0.870508	rs1546993	25	RP11-111A21.1	150836	intergenic	2.594	6	7	15
14:40138562:C:T	rs8019297	14	40138562	C	T	0.497	9.449e-06	4.429	0.95039	rs1546993	25	RP11-111A21.1	155577	intergenic	4.035	7	5	15
14:40145606:C:T	rs17109607	14	40145606	T	C	0.4849	6.815e-06	4.499	0.90138	rs1546993	25	RP11-111A21.1	162621	intergenic	1.973	7	5	15
14:40147348:C:T	rs56382477	14	40147348	T	C	0.4849	6.815e-06	4.499	0.90138	rs1546993	25	RP11-111A21.1	164363	intergenic	2.661	7	5	15
14:40148761:A:G	rs1950629	14	40148761	A	G	0.4849	7.872e-06	4.469	0.90138	rs1546993	25	RP11-111A21.1	165776	intergenic	0.892	7	5	15
14:40153203:A:G	rs1546993	14	40153203	A	G	0.4939	1.961e-06	4.757	1	rs1546993	25	RP11-111A21.1	170218	intergenic	11.87	5	5	15
14:40155213:A:G	rs67957874	14	40155213	A	G	0.4917	2.228e-05	4.241	0.94664	rs1546993	25	RP11-111A21.1	172228	intergenic	1.481	5	9	15
14:40155787:A:G	rs1956131	14	40155787	G	A	0.4985	1.221e-05	4.374	0.972099	rs1546993	25	RP11-111A21.1	172802	intergenic	1.141	5	9	15
14:40155825:A:G	rs7152784	14	40155825	A	G	0.4985	1.221e-05	4.374	0.972099	rs1546993	25	RP11-111A21.1	172840	intergenic	4.366	5	9	15
14:40157074:A:C	rs8004570	14	40157074	A	C	0.4766	3.607e-05	4.131	0.911291	rs1546993	25	RP11-111A21.1	174089	intergenic	1.722	6	9	15
14:40159311:G:T	rs1956133	14	40159311	T	G	0.4644	2.145e-05	4.249	0.893901	rs1546993	25	RP11-111A21.1	176326	intergenic	10.47	6	9	15
14:40159598:A:T	rs1956135	14	40159598	A	T	0.4985	9.325e-06	4.432	0.972099	rs1546993	25	RP11-111A21.1	176613	intergenic	12.45	6	9	15
14:40159629:A:G	rs1956136	14	40159629	G	A	0.4985	9.325e-06	4.432	0.972099	rs1546993	25	RP11-111A21.1	176644	intergenic	2.204	6	9	15
14:40166542:A:G	rs73285320	14	40166542	G	A	0.3812	3.465e-05	-4.141	0.628994	rs1546993	25	RP11-111A21.1	183557	intergenic	2.501	7	9	15
16:54359850:A:G	rs2388632	16	54359850	G	A	0.2693	8.487e-05	3.93	0.801489	rs60889063	26	IRX3	39174	intergenic	1.268	5	2	14
16:54370649:G:T	rs4784367	16	54370649	G	T	0.3533	0.0005492	3.456	0.689702	rs60889063	26	RP11-434E6.2	29269	intergenic	21.5	5	5	14
16:54370959:A:G	rs67575900	16	54370959	A	G	0.3472	0.0003091	3.608	0.729433	rs60889063	26	RP11-434E6.2	28959	intergenic	0.657	4	5	14
16:54371831:A:G	rs60889063	16	54371831	G	A	0.2821	4.386e-06	4.592	1	rs60889063	26	RP11-434E6.2	28087	intergenic	1.489	5	5	14
16:54372863:C:G	rs11864160	16	54372863	C	G	0.2821	2.813e-05	4.188	0.746371	rs60889063	26	RP11-434E6.2	27055	intergenic	0.508	7	5	14
16:54390875:A:G	rs2160295	16	54390875	G	A	0.2648	0.0006388	3.415	0.606449	rs60889063	26	RP11-434E6.2	9043	intergenic	3.831	7	5	15
16:54392615:C:T	rs55821218	16	54392615	T	C	0.2655	0.0004771	3.493	0.604572	rs60889063	26	RP11-434E6.2	7303	intergenic	2.365	7	5	14
16:84631268:C:T	rs2018540	16	84631268	C	T	0.3306	3.788e-05	-4.12	0.616815	rs934166	27	COTL1	0	intronic	0.641	2a	1	7
16:84631300:A:G	rs934166	16	84631300	G	A	0.4433	4.633e-06	-4.581	1	rs934166	27	COTL1	0	intronic	4.741	3a	1	7
16:87142452:C:T	rs75985084	16	87142452	T	C	0.05371	9.235e-06	-4.434	1	rs75985084	28	C16orf95	0	NA	0.297	5	5	15
16:87145574:C:T	rs78229117	16	87145574	C	T	0.06127	3.335e-05	-4.149	0.865224	rs75985084	28	C16orf95	0	NA	5.743	7	5	15
16:87152746:A:G	rs16942694	16	87152746	A	G	0.06051	0.0001228	-3.84	0.877244	rs75985084	28	C16orf95	0	NA	5.258	6	5	15
16:87153659:C:T	rs58421528	16	87153659	T	C	0.06051	0.0001228	-3.84	0.877244	rs75985084	28	C16orf95	0	NA	1.511	5	5	15
16:87164603:A:G	rs111734347	16	87164603	G	A	0.05144	0.001793	-3.123	0.773818	rs75985084	28	C16orf95	0	NA	0.17	6	5	15
17:6983315:G:T	rs11657498	17	6983315	T	G	0.1082	4.346e-06	-4.594	0.991546	rs11653290	29	CLEC10A	0	intronic	2.097	5	1	15
17:6983467:A:G	rs55835902	17	6983467	G	A	0.1074	4.346e-06	-4.594	1	rs11653290	29	CLEC10A	0	UTR5	2.275	5	1	15
17:6983529:A:C	rs11653290	17	6983529	C	A	0.1074	4.224e-06	-4.6	1	rs11653290	29	CLEC10A	0	UTR5	4.744	5	1	15
17:6987355:C:T	rs35755455	17	6987355	C	T	0.09834	2.152e-05	-4.249	0.715364	rs11653290	29	CLEC10A	3728	intergenic	0.584	3a	2	14
17:21455337:A:T	rs72624978	17	21455337	T	A	0.08699	4.696e-05	-4.07	0.719123	17:21509395	30	C17orf51:RP11-822E23.8	00:00:00	ncRNA_intronic	1.465	5	1	15
17:21455978:C:T	rs56892569	17	21455978	T	C	0.0938	8.147e-05	-3.94	0.780123	17:21509395	30	C17orf51:RP11-822E23.8	00:00:00	ncRNA_intronic	7.326	5	5	15
17:21462409:C:G	17:21462409	17	21462409	C	G	0.08548	5.211e-05	-4.046	0.706129	17:21509395	30	C17orf51:RP11-822E23.8	00:00:00	ncRNA_intronic	0.328	3a	5	15
17:21481436:A:G	17:21481436	17	21481436	A	G	0.09834	0.0001525	-3.787	0.752106	17:21509395	30	AC138710.1	264	downstream	3.12	6	5	15
17:21481503:G:T	17:21481503	17	21481503	T	G	0.09834	0.0001525	-3.787	0.752106	17:21509395	30	AC138710.1	331	downstream	0.751	7	5	15
17:21490090:A:G	rs566987679	17	21490090	A	G	0.0938	7.961e-05	-3.946	0.780123	17:21509395	30	RP11-822E23.5	5969	intergenic	1.337	7	5	15
17:21491027:C:T	17:21491027	17	21491027	T	C	0.09531	0.0001851	-3.739	0.709356	17:21509395	30	RP11-822E23.5	5032	intergenic	6.246	5	5	15
17:21497571:C:T	17:21497571	17	21497571	C	T	0.09607	9.16e-05	-3.912	0.786169	17:21509395	30	RP11-822E23.5	124	downstream	8.467	5	7	15
17:21503255:A:G	17:21503255	17	21503255	A	G	0.09455	8.411e-05	-3.932	0.801064	17:21509395	30	RP11-822E23.5	5808	intergenic	9.138	5	8	15
17:21509395:C:T	17:21509395	17	21509395	T	C	0.1157	5.733e-06	-4.536	1	17:21509395	30	RP11-822E23.5	11948	intergenic	6.09	7	5	15
17:21522960:C:T	17:21522960	17	21522960	C	T	0.09455	0.001676	-3.142	0.635063	17:21509395	30	NCOR1P2	13053	intergenic	2.931	7	5	15
17:21525990:C:T	17:21525990	17	21525990	C	T	0.09531	0.001882	-3.108	0.630483	17:21509395	30	NCOR1P2	10023	intergenic	2.429	7	5	15
17:35113090:C:T	rs116207867	17	35113090	T	C	0.059	0.002074	3.079	0.632842	rs8067970	31	CTD-3194G12.2	30438	intergenic	1.608	6	5	14
17:35114534:A:G	rs77996312	17	35114534	G	A	0.05295	0.0006618	3.405	0.710965	rs8067970	31	CTD-3194G12.2	31882	intergenic	0.897	5	5	14
17:35114663:C:T	rs75372704	17	35114663	T	C	0.05295	0.0006618	3.405	0.710965	rs8067970	31	CTD-3194G12.2	32011	intergenic	2.412	5	5	14
17:35117637:A:G	rs569366679	17	35117637	A	G	0.059	0.001831	3.116	0.632842	rs8067970	31	CTD-3194G12.2	34985	intergenic	2.552	5	1	14
17:35128914:A:G	rs76071531	17	35128914	A	G	0.06354	3.879e-05	4.115	0.936121	rs8067970	31	CTD-3194G12.2	46262	intergenic	3.484	5	5	14
17:35133118:A:G	rs34848838	17	35133118	A	G	0.06354	1.44e-05	4.338	0.936121	rs8067970	31	CTD-3194G12.2	50466	intergenic	0.129	7	5	14
17:35145662:A:G	rs8067970	17	35145662	A	G	0.06278	3.519e-06	4.638	1	rs8067970	31	CTD-3194G12.2	63010	intergenic	0.457	5	7	14
17:52118993:C:T	17:52118993	17	52118993	C	T	0.1626	0.0001105	3.866	0.625994	rs10401037	32	RP11-618P13.1	86307	intergenic	2.684	6	9	15
17:52125576:C:G	rs9903256	17	52125576	G	C	0.1626	0.0001908	3.731	0.625994	rs10401037	32	RP11-618P13.1	92890	intergenic	15.35	7	5	15
17:52129855:C:T	rs28776806	17	52129855	T	C	0.1702	0.0001773	3.749	0.600855	rs10401037	32	RP11-618P13.1	97169	intergenic	0.975	6	9	15
17:52130771:C:G	17:52130771	17	52130771	G	C	0.1619	0.0001906	3.731	0.629592	rs10401037	32	RP11-618P13.1	98085	intergenic	0.021	7	9	15
17:52143383:G:T	rs9907069	17	52143383	G	T	0.1566	4.195e-05	4.096	0.653002	rs10401037	32	RP11-618P13.1	110697	intergenic	3.343	7	9	15
17:52144539:C:T	rs722614	17	52144539	C	T	0.1626	0.0001092	3.869	0.618551	rs10401037	32	RP11-618P13.1	111853	intergenic	3.728	NA	9	15
17:52211671:A:T	rs116058948	17	52211671	A	T	0.1536	2.551e-05	4.21	0.641761	rs10401037	32	RP11-618P13.1	178985	intergenic	2.391	7	7	15
17:52227047:A:G	rs78213290	17	52227047	A	G	0.1475	0.0002139	3.702	0.632669	rs10401037	32	RP11-618P13.1	194361	intergenic	1.213	5	9	15
17:52235347:C:G	rs10401037	17	52235347	G	C	0.2216	3.76e-06	4.624	1	rs10401037	32	RP11-618P13.1	202661	intergenic	1.578	6	9	15
17:52237855:C:T	rs9891974	17	52237855	C	T	0.2625	0.001931	3.101	0.696727	rs10401037	32	RP11-618P13.1	205169	intergenic	5.13	5	9	15
17:52238772:C:T	rs7223662	17	52238772	C	T	0.2776	0.00286	2.982	0.621778	rs10401037	32	RP11-618P13.1	206086	intergenic	4.078	6	15	15
17:52240288:A:G	rs7210232	17	52240288	G	A	0.2776	0.00286	2.982	0.621778	rs10401037	32	RP11-618P13.1	207602	intergenic	1.595	7	15	15
17:52243229:C:G	rs7224853	17	52243229	C	G	0.2519	0.001314	3.213	0.70978	rs10401037	32	RP11-618P13.1	210543	intergenic	0.315	7	5	15
17:55703525:A:G	rs115990591	17	55703525	G	A	0.05295	1.295e-06	4.84	1	rs115990591	33	MSI2	0	intronic	3.577	5	4	5
17:55704447:A:G	rs113379610	17	55704447	G	A	0.05522	4.606e-05	4.075	0.955409	rs115990591	33	MSI2	0	intronic	2.336	2b	4	5
17:64782722:C:G	rs8073185	17	64782722	G	C	0.4266	0.0003754	-3.557	0.622568	rs4791039	34	PRKCA	0	intronic	22.2	5	4	5
17:64783477:A:G	rs9916272	17	64783477	G	A	0.4418	0.0001508	-3.79	0.629883	rs4791039	34	PRKCA	0	intronic	2.508	5	4	4
17:64783759:A:G	rs9889353	17	64783759	G	A	0.4448	0.0002023	-3.716	0.62132	rs4791039	34	PRKCA	0	intronic	2.228	5	4	4
17:64784183:C:T	rs9890506	17	64784183	T	C	0.4312	6.018e-05	-4.012	0.656925	rs4791039	34	PRKCA	0	intronic	6.282	5	4	4
17:64784203:A:G	rs9890888	17	64784203	A	G	0.4312	6.018e-05	-4.012	0.656925	rs4791039	34	PRKCA	0	intronic	0.735	5	4	4
17:64784371:A:G	rs9896328	17	64784371	G	A	0.4312	7.15e-05	-3.971	0.656925	rs4791039	34	PRKCA	0	intronic	2.601	7	4	4
17:64784533:A:G	rs9897186	17	64784533	A	G	0.4312	8.203e-05	-3.938	0.656925	rs4791039	34	PRKCA	0	intronic	2.697	7	4	4
17:64784633:C:T	rs9898651	17	64784633	C	T	0.4395	9.053e-05	-3.915	0.635128	rs4791039	34	PRKCA	0	intronic	3.401	6	4	4
17:64784939:C:T	rs73994621	17	64784939	C	T	0.3404	2.559e-06	-4.703	0.985396	rs4791039	34	PRKCA	0	intronic	2.55	5	4	4
17:64785022:A:G	rs2228945	17	64785022	A	G	0.3336	2.893e-06	-4.678	0.960373	rs4791039	34	PRKCA	0	exonic	11.2	7	4	4
17:64785203:A:G	rs9898776	17	64785203	A	G	0.3359	3.185e-06	-4.658	0.978287	rs4791039	34	PRKCA	0	intronic	2.41	5	4	4
17:64785367:A:G	rs9904560	17	64785367	A	G	0.2663	0.0003385	-3.584	0.68746	rs4791039	34	PRKCA	0	intronic	0.87	5	4	4
17:64785493:A:G	rs9904795	17	64785493	A	G	0.3359	3.185e-06	-4.658	0.978287	rs4791039	34	PRKCA	0	intronic	1.899	5	4	4
17:64785689:A:G	rs9904689	17	64785689	G	A	0.3359	3.185e-06	-4.658	0.978287	rs4791039	34	PRKCA	0	intronic	2.289	5	4	4
17:64785767:A:G	rs9905531	17	64785767	A	G	0.3366	3.185e-06	-4.658	0.981892	rs4791039	34	PRKCA	0	intronic	3.804	5	4	4
17:64785920:C:T	rs3826351	17	64785920	C	T	0.4274	0.0001002	-3.89	0.650196	rs4791039	34	PRKCA	0	intronic	0.092	NA	4	4
17:64787573:C:T	rs4791040	17	64787573	C	T	0.3404	2.559e-06	-4.703	1	rs4791039	34	PRKCA	0	intronic	0.29	NA	2	5
17:64787600:A:G	rs4791039	17	64787600	A	G	0.3404	1.895e-06	-4.764	1	rs4791039	34	PRKCA	0	intronic	0.733	NA	2	5
17:64787606:A:G	17:64787606	17	64787606	A	G	0.3404	1.895e-06	-4.764	1	rs4791039	34	PRKCA	0	intronic	1.094	NA	2	5
17:64787894:A:G	rs4791037	17	64787894	G	A	0.3381	3.185e-06	-4.658	0.981833	rs4791039	34	PRKCA	0	intronic	0.222	NA	2	5
17:64788827:A:G	rs16960228	17	64788827	A	G	0.3374	3.185e-06	-4.658	0.98551	rs4791039	34	PRKCA	0	intronic	0.622	4	4	4
17:64790261:A:G	rs9915231	17	64790261	G	A	0.3812	4.976e-05	-4.057	0.758405	rs4791039	34	PRKCA	0	intronic	2.043	7	4	5
17:64790510:G:T	rs9916314	17	64790510	T	G	0.3812	5.267e-05	-4.043	0.758405	rs4791039	34	PRKCA	0	intronic	1.562	7	4	5
17:64790745:G:T	rs28398230	17	64790745	G	T	0.354	7.311e-05	-3.966	0.666732	rs4791039	34	PRKCA	0	intronic	3.092	6	4	5
18:41413084:G:T	rs551160836	18	41413084	G	T	0.07564	8.488e-07	-4.924	1	rs551160836	35	RNU6-443P	853	upstream	1.403	NA	5	15
19:6142535:A:G	rs2163829	19	6142535	G	A	0.2678	0.006974	-2.698	0.605066	rs8111212	36	RFX2:ACSBG2	00:00:00	intronic	0.039	7	5	15
19:6145058:A:C	rs11085160	19	6145058	C	A	0.2693	0.0042	-2.863	0.603092	rs8111212	36	RFX2:ACSBG2	00:00:00	intronic	NA	5	5	15
19:6145564:G:T	rs10409209	19	6145564	T	G	0.2685	0.0042	-2.863	0.606068	rs8111212	36	RFX2:ACSBG2	00:00:00	intronic	2.429	1f	5	15
19:6154255:A:C	rs1560697	19	6154255	C	A	0.2663	0.003989	-2.879	0.617499	rs8111212	36	RFX2:ACSBG2	00:00:00	intronic	0.665	6	5	15
19:6155795:C:T	rs7258273	19	6155795	C	T	0.267	0.004052	-2.874	0.6193	rs8111212	36	RFX2:ACSBG2	00:00:00	intronic	0.094	7	5	15
19:6156014:A:G	rs7257052	19	6156014	A	G	0.2663	0.004052	-2.874	0.617499	rs8111212	36	RFX2:ACSBG2	00:00:00	intronic	3.361	5	5	15
19:6156483:C:T	rs4807840	19	6156483	C	T	0.2663	0.004933	-2.811	0.617499	rs8111212	36	RFX2:ACSBG2	00:00:00	exonic	1.391	1f	5	15
19:6157043:C:T	rs6510878	19	6157043	C	T	0.2663	0.005266	-2.79	0.617499	rs8111212	36	RFX2:ACSBG2	00:00:00	intronic	0.023	7	5	15
19:6157255:A:G	rs7408308	19	6157255	G	A	0.2663	0.00559	-2.771	0.617499	rs8111212	36	RFX2:ACSBG2	00:00:00	intronic	2.303	7	5	15
19:6158541:A:T	rs7255678	19	6158541	A	T	0.2678	0.004695	-2.827	0.615473	rs8111212	36	RFX2:ACSBG2	00:00:00	intronic	5.666	5	5	15
19:6166665:C:T	rs8111212	19	6166665	T	C	0.3548	4.649e-06	-4.58	1	rs8111212	36	RFX2:ACSBG2	00:00:00	intronic	0.64	6	9	15
20:40334493:C:T	rs75110890	20	40334493	T	C	0.07564	5.44e-05	4.036	0.625738	rs113561658	37	Y_RNA	6137	intergenic	1.38	7	5	15
20:40334951:A:C	rs77437767	20	40334951	C	A	0.07564	5.44e-05	4.036	0.625738	rs113561658	37	SNORA26	6166	intergenic	3.544	7	5	15
20:40334985:C:T	rs111451916	20	40334985	C	T	0.07564	4.507e-05	4.08	0.625738	rs113561658	37	SNORA26	6132	intergenic	0.418	7	5	15
20:40336290:A:G	rs113561658	20	40336290	G	A	0.05068	4.473e-06	4.588	1	rs113561658	37	SNORA26	4827	intergenic	0.281	6	5	15
20:40339136:A:G	rs75483612	20	40339136	A	G	0.07489	0.0001279	3.83	0.63291	rs113561658	37	SNORA26	1981	intergenic	2.057	7	5	15
20:40341358:A:C	rs112414605	20	40341358	C	A	0.07564	0.0001389	3.81	0.625738	rs113561658	37	SNORA26	118	upstream	1.606	4	2	15
20:40342555:C:T	rs113215618	20	40342555	T	C	0.07564	0.0001389	3.81	0.625738	rs113561658	37	SNORA26	1315	intergenic	5.316	4	2	15
20:40342737:C:T	rs16986007	20	40342737	T	C	0.07564	0.0001389	3.81	0.625738	rs113561658	37	SNORA26	1497	intergenic	9.196	4	2	15
20:40342978:C:T	rs77411796	20	40342978	C	T	0.07564	3.574e-05	4.133	0.625738	rs113561658	37	SNORA26	1738	intergenic	3.472	5	2	15
20:40344080:A:G	rs75814588	20	40344080	A	G	0.07564	3.574e-05	4.133	0.625738	rs113561658	37	SNORA26	2840	intergenic	4.457	2b	2	15
20:40344542:C:T	rs113830154	20	40344542	C	T	0.07564	3.574e-05	4.133	0.625738	rs113561658	37	SNORA26	3302	intergenic	0.79	4	2	15
20:40344606:A:G	rs111466005	20	40344606	G	A	0.07564	3.574e-05	4.133	0.625738	rs113561658	37	SNORA26	3366	intergenic	2.826	4	2	15
20:40344745:A:T	rs78019245	20	40344745	T	A	0.07564	3.574e-05	4.133	0.625738	rs113561658	37	SNORA26	3505	intergenic	1.753	3a	2	15
20:40345108:C:T	rs111565346	20	40345108	T	C	0.07564	3.574e-05	4.133	0.625738	rs113561658	37	SNORA26	3868	intergenic	3.139	3a	5	15
20:40345364:C:T	rs2038522	20	40345364	C	T	0.07564	7.765e-05	3.952	0.625738	rs113561658	37	SNORA26	4124	intergenic	1.606	5	5	15
20:40345604:C:T	rs2038523	20	40345604	C	T	0.07564	7.765e-05	3.952	0.625738	rs113561658	37	SNORA26	4364	intergenic	0.551	5	5	15
20:40345624:A:G	rs2038524	20	40345624	G	A	0.07564	7.765e-05	3.952	0.625738	rs113561658	37	SNORA26	4384	intergenic	1.958	7	5	15
20:40345717:C:T	rs112327933	20	40345717	T	C	0.07564	7.765e-05	3.952	0.625738	rs113561658	37	SNORA26	4477	intergenic	2.003	6	5	15
21:18270964:C:G	rs389332	21	18270964	G	C	0.05976	9.645e-06	-4.425	1	rs389332	38	AF212831.2	24952	intergenic	2.192	5	5	15
21:18276518:C:T	rs391348	21	18276518	C	T	0.07262	0.02678	-2.215	0.768928	rs389332	38	AF212831.2	30506	intergenic	2.479	NA	9	15
21:18277946:C:T	rs370805	21	18277946	C	T	0.06127	8.659e-05	-3.925	0.948444	rs389332	38	AF212831.2	31934	intergenic	1.5	NA	9	15
21:18278479:A:C	rs368943	21	18278479	C	A	0.06051	0.000115	-3.857	0.935283	rs389332	38	AF212831.2	32467	intergenic	NA	NA	15	15
21:18279526:A:C	rs380807	21	18279526	C	A	0.06127	0.0001019	-3.886	0.948444	rs389332	38	AF212831.2	33514	intergenic	0.423	NA	9	15
21:18283289:C:G	rs2824116	21	18283289	C	G	0.05825	0.0001959	-3.724	0.89607	rs389332	38	AF212831.2	37277	intergenic	1.73	5	5	15
21:36097794:C:T	rs9974620	21	36097794	C	T	0.3525	8.563e-07	-4.922	1	rs9974620	39	LINC00160	0	ncRNA_intronic	3.046	7	2	15

## Sheet: SuppTable_3a_GenMapNan
Supplementary Table 3a. Genes implicated by positional, eQTL, or chromatin interaction mapping of SNPs associated with Gene-Smoking interaction for cIMT in Nanoro sample
Note: SNPs were identified by a genome-wide suggestive ( P<1e-5) association in a sample-size weighted meta-analysis, grouped into LD-independent genomic loci, and mapped to genes using positional mapping, eQTL mapping, and chromatin interaction strategies. Loci for genes mapped by two genomic risk loci are listed as locus1:locus2. Blue highlighted rows represent low confidence loci; see Suppleme…
GenomicLocus	Gene	Ensembl ID	Entrez ID	CHR	Start BP	End BP	pLI	posMap #SNPs	posMap Max CADD	eqtlMap #SNPs	eqtlMap minP	eqtlMap minQ	eqtlMap Tissues	eqtlMap Direction	ciMap	ciMap Tissues	minGwasP	IndSigSNPs
Ensembl ID	Gene	CHR	Start BP	End BP			Entrez ID		pLI		posMap #SNPs	posMap Max CADD	eqtlMap #SNPs	eqtlMap minP	eqtlMap minQ	eqtlMap Tissues	eqtlMap Direction	ciMap	ciMap Tissues	minGwasP	IndSigSNPs	GenomicLocus
ensg	symbol	chr	start	end	strand	type	entrezID	HUGO	pLI	ncRVIS	posMapSNPs	posMapMaxCADD	eqtlMapSNPs	eqtlMapminP	eqtlMapminQ	eqtlMapts	eqtlDirection	ciMap	ciMapts	minGwasP	IndSigSNPs	GenomicLocus
ENSG00000130940	CASZ1	1	10696661	10856707	-1	protein_coding	54897	CASZ1	0.999938476327784	-1.10487578	6	15.35	0	NA	NA	NA	NA	Yes	Spleen	5.163e-06	rs205482	1
ENSG00000117114	LPHN2	1	81771845	82458120	1	protein_coding	23266	LPHN2	0.999999944952148	0.222631863	0	0	0	NA	NA	NA	NA	Yes	Left_Ventricle	4.093e-06	rs616472	2
ENSG00000137941	TTLL7	1	84330711	84464833	-1	protein_coding	79739	TTLL7	0.268072469343805	0.37063181	0	0	0	NA	NA	NA	NA	Yes	hESC:IMR90:Mesenchymal_Stem_Cell:Mesendoderm:Trophoblast-like_Cell	4.093e-06	rs616472:rs11161464	2
ENSG00000271576	RP11-486G15.2	1	84542014	84543614	-1	lincRNA	NA	NA	NA	NA	0	0	0	NA	NA	NA	NA	Yes	hESC:IMR90:Mesenchymal_Stem_Cell:Mesendoderm	4.093e-06	rs11161464:rs616472	2
ENSG00000142875	PRKACB	1	84543745	84704181	1	protein_coding	5567	PRKACB	0.612478408550855	0.228743351	1	7.828	0	NA	NA	NA	NA	Yes	hESC:IMR90:Mesenchymal_Stem_Cell:Mesendoderm	4.093e-06	rs616472;rs11161464:rs616472	2
ENSG00000226970	RP11-82H13.2	1	84710017	84710260	1	pseudogene	NA	NA	NA	NA	1	7.828	0	NA	NA	NA	NA	No	NA	4.093e-06	rs616472	2
ENSG00000199959	SNORA2	1	84743004	84743140	1	snoRNA	NA	NA	NA	NA	1	7.828	0	NA	NA	NA	NA	No	NA	4.093e-06	rs616472	2
ENSG00000203943	SAMD13	1	84764049	84855640	1	protein_coding	148418	SAMD13	0.128562761436203	-0.157133711	1	7.828	0	NA	NA	NA	NA	Yes	hESC:IMR90:Mesenchymal_Stem_Cell:Mesendoderm:Trophoblast-like_Cell	4.093e-06	rs616472;rs616472:rs11161464	2
ENSG00000117133	RPF1	1	84944942	84963473	1	protein_coding	80135	RPF1	9.47682922183822e-07	0.058049419	0	0	0	NA	NA	NA	NA	Yes	hESC:IMR90:Mesenchymal_Stem_Cell	4.093e-06	rs616472:rs11161464	2
ENSG00000174021	GNG5	1	84964008	84972248	-1	protein_coding	2787	GNG5	0.524989345213255	0.694830835	0	0	0	NA	NA	NA	NA	Yes	hESC	4.093e-06	rs616472	2
ENSG00000122432	SPATA1	1	84971974	85031877	1	pseudogene	100505741	SPATA1	NA	NA	0	0	0	NA	NA	NA	NA	Yes	hESC	4.093e-06	rs616472	2
ENSG00000117151	CTBS	1	85015289	85040163	-1	protein_coding	1486	CTBS	2.00761188893893e-07	-0.036710983	0	0	0	NA	NA	NA	NA	Yes	hESC:IMR90:Left_Ventricle:Mesenchymal_Stem_Cell:Mesendoderm	4.093e-06	rs616472:rs11161464	2
ENSG00000117155	SSX2IP	1	85109390	85156486	-1	protein_coding	117178	SSX2IP	0.000829858792208633	-0.971398552	0	0	0	NA	NA	NA	NA	Yes	hESC:IMR90:Left_Ventricle:Mesenchymal_Stem_Cell:Mesendoderm	4.093e-06	rs616472:rs11161464	2
ENSG00000251899	AC104169.1	1	85258751	85258882	-1	miRNA	NA	NA	NA	NA	14	8.388	0	NA	NA	NA	NA	No	NA	7.335e-07	rs11161454;rs11161464;rs9662096	2
ENSG00000171517	LPAR3	1	85277285	85358896	-1	protein_coding	23566	LPAR3	0.786363329238024	1.00227692	16	20.2	5	3.27458e-06	0.0024321181170046	BIOS_eQTL_geneLevel	+	Yes	hESC:IMR90:Mesenchymal_Stem_Cell:Mesendoderm:Trophoblast-like_Cell	7.335e-07	rs11161454;rs11161464;rs9662096;rs616472:rs11161464	2
ENSG00000055732	MCOLN3	1	85483765	85514182	-1	protein_coding	55283	MCOLN3	3.77973883718057e-07	0.339538599	0	0	0	NA	NA	NA	NA	Yes	GM12878:hESC:IMR90:Mesenchymal_Stem_Cell:Mesendoderm	4.093e-06	rs11161464:rs616472	2
ENSG00000261737	RP4-612B15.3	1	87169185	87170145	-1	antisense	105378828	LOC105378828	NA	NA	0	0	0	NA	NA	NA	NA	Yes	IMR90	4.093e-06	rs616472	2
ENSG00000097033	SH3GLB1	1	87170259	87213867	1	protein_coding	51100	SH3GLB1	0.730421396838354	NA	0	0	0	NA	NA	NA	NA	Yes	IMR90	4.093e-06	rs616472	2
ENSG00000120332	TNN	1	175036994	175117202	1	protein_coding	63923	TNN	5.19247511001232e-15	-0.261804813	17	5.474	14	1.52681e-05	4.58082e-11	GTEx_v7_Heart_Atrial_Appendage	-	No	NA	4.077e-06	rs1057305	3
ENSG00000235750	KIAA0040	1	175126123	175162135	-1	protein_coding	9674	KIAA0040	NA	NA	17	5.474	17	2.31711e-32	0	GTEx_v6_Artery_Tibial:GTEx_v6_Skin_Not_Sun_Exposed_Suprapubic:GTEx_v6_Skin_Sun_Exposed_Lower_leg:GTEx_v7_Adipose_Subcutaneous:GTEx_v7_Artery_Aorta:GTEx_v7_Artery_Tibial:GTEx_v7_Nerve_Tibial:GTEx_v7_Skin_Not_Sun_Exposed_Suprapubic:GTEx_v7_Skin_Sun_Exposed_Lower_leg:GTEx_v7_Whole_Blood:BIOS_eQTL_geneLevel	-	Yes	GM12878:hESC:IMR90:Left_Ventricle:Liver:Mesenchymal_Stem_Cell:Mesendoderm:Trophoblast-like_Cell	4.077e-06	rs1057305	3
ENSG00000230687	RP5-1114G22.2	1	175172364	175173985	-1	lincRNA	NA	NA	NA	NA	12	5.474	0	NA	NA	NA	NA	No	NA	4.077e-06	rs1057305	3
ENSG00000116147	TNR	1	175284330	175712906	-1	protein_coding	7143	TNR	0.987762731547826	-0.801831447	0	0	0	NA	NA	NA	NA	Yes	hESC:IMR90:Mesenchymal_Stem_Cell:Mesendoderm:Trophoblast-like_Cell	2.17e-05	rs1057305	3
ENSG00000143207	RFWD2	1	175913967	176176629	-1	protein_coding	64326	RFWD2	0.998566093485584	NA	0	0	0	NA	NA	NA	NA	Yes	IMR90:Left_Ventricle:Mesenchymal_Stem_Cell:Mesendoderm:Trophoblast-like_Cell	2.17e-05	rs1057305	3
ENSG00000236021	RP11-195C7.1	1	176176784	176198466	1	antisense	NA	NA	NA	NA	0	0	0	NA	NA	NA	NA	Yes	IMR90:Left_Ventricle:Mesenchymal_Stem_Cell:Mesendoderm:Trophoblast-like_Cell	2.17e-05	rs1057305	3
ENSG00000116183	PAPPA2	1	176432307	176814735	1	protein_coding	60676	PAPPA2	0.00125005429153315	0.692746634	0	0	0	NA	NA	NA	NA	Yes	hESC:IMR90:Mesenchymal_Stem_Cell:Mesendoderm:Trophoblast-like_Cell	2.17e-05	rs1057305	3
ENSG00000152092	ASTN1	1	176826438	177134109	-1	protein_coding	460	ASTN1	0.999415997291979	-0.346375966	0	0	0	NA	NA	NA	NA	Yes	IMR90:Left_Ventricle	2.17e-05	rs1057305	3
ENSG00000198797	BRINP2	1	177140633	177251558	1	protein_coding	57795	BRINP2	0.999086308312748	-0.807648677	0	0	0	NA	NA	NA	NA	Yes	IMR90:Left_Ventricle	2.17e-05	rs1057305	3
ENSG00000224687	RASAL2-AS1	1	178060643	178063119	-1	lincRNA	100302401	RASAL2-AS1	NA	NA	0	0	0	NA	NA	NA	NA	Yes	Left_Ventricle:Mesenchymal_Stem_Cell	2.17e-05	rs1057305	3
ENSG00000075391	RASAL2	1	178062864	178448644	1	protein_coding	9462	RASAL2	0.226449659060918	NA	0	0	0	NA	NA	NA	NA	Yes	Left_Ventricle:Mesenchymal_Stem_Cell	2.17e-05	rs1057305	3
ENSG00000117597	DIEXF	1	210001352	210030910	1	protein_coding	27042	DIEXF	0.0492348597469146	2.014490881	0	0	0	NA	NA	NA	NA	Yes	Mesendoderm	0.0003704	rs79936010	4
ENSG00000143473	KCNH1	1	210856555	211307457	-1	protein_coding	3756	KCNH1	0.333014560273438	NA	21	19.24	0	NA	NA	NA	NA	Yes	Mesendoderm	8.554e-06	rs79936010	4
ENSG00000224668	IPO8P1	1	211032519	211035627	-1	pseudogene	100418819	IPO8P1	NA	NA	4	19.24	0	NA	NA	NA	NA	Yes	Mesendoderm	0.0003704	rs79936010	4
ENSG00000234233	KCNH1-IT1	1	211305930	211306716	-1	sense_intronic	100874296	KCNH1-IT1	NA	NA	0	0	0	NA	NA	NA	NA	Yes	Mesendoderm	0.0003704	rs79936010	4
ENSG00000115841	RMDN2	2	38150330	38294285	1	protein_coding	151393	RMDN2	5.20509387294093e-16	0.150486604	2	2.688	0	NA	NA	NA	NA	No	NA	6.268e-06	rs148751085;rs187829394	5
ENSG00000235848	RMDN2-AS1	2	38177144	38294184	-1	antisense	101410544	RMDN2-AS1	NA	NA	2	2.688	0	NA	NA	NA	NA	No	NA	6.268e-06	rs148751085;rs187829394	5
ENSG00000138061	CYP1B1	2	38294116	38337044	-1	protein_coding	1545	CYP1B1	0.00029647591103164	-1.041276908	2	2.688	0	NA	NA	NA	NA	No	NA	6.268e-06	rs148751085;rs187829394	5
ENSG00000232973	CYP1B1-AS1	2	38302791	38408997	1	antisense	285154	CYP1B1-AS1	NA	NA	2	2.688	0	NA	NA	NA	NA	No	NA	6.268e-06	rs148751085;rs187829394	5
ENSG00000229160	AC009229.6	2	38359779	38366088	-1	lincRNA	NA	NA	NA	NA	2	2.688	0	NA	NA	NA	NA	No	NA	6.268e-06	rs148751085;rs187829394	5
ENSG00000243667	WDR92	2	68350068	68384692	-1	protein_coding	116143	WDR92	0.805659459340733	0.777704486	0	0	0	NA	NA	NA	NA	Yes	IMR90	0.0001318	rs11126201	6
ENSG00000115946	PNO1	2	68384976	68403370	1	protein_coding	56902	PNO1	0.256534456542778	0.04513197	0	0	0	NA	NA	NA	NA	Yes	IMR90	0.0001318	rs11126201	6
ENSG00000273064	RP11-474G23.3	2	68480002	68480980	1	antisense	NA	NA	NA	NA	0	0	0	NA	NA	NA	NA	Yes	IMR90:Mesenchymal_Stem_Cell	0.0001318	rs11126201	6
ENSG00000221443	AC017083.3	2	68500236	68500338	1	miRNA	NA	NA	NA	NA	0	0	0	NA	NA	NA	NA	Yes	IMR90:Mesenchymal_Stem_Cell	0.0001318	rs11126201	6
ENSG00000229462	AC127383.1	2	68672842	68676306	-1	pseudogene	NA	NA	NA	NA	0	0	0	NA	NA	NA	NA	Yes	IMR90	0.0001318	rs11126201	6
ENSG00000204923	FBXO48	2	68686551	68694390	-1	protein_coding	554251	FBXO48	0.0166653080454206	-1.32488721	0	0	0	NA	NA	NA	NA	Yes	Aorta:GM12878:hESC:IMR90:Liver:Mesenchymal_Stem_Cell:Mesendoderm:Neural_Progenitor_Cell:Trophoblast-like_Cell	0.0001318	rs11126201	6
ENSG00000169621	APLF	2	68694693	68858004	1	protein_coding	200558	APLF	1.13610489937719e-17	-0.316181388	0	0	0	NA	NA	NA	NA	Yes	Aorta:GM12878:hESC:IMR90:Liver:Mesenchymal_Stem_Cell:Mesendoderm:Neural_Progenitor_Cell:Trophoblast-like_Cell	0.0001318	rs11126201	6
ENSG00000169618	PROKR1	2	68870721	68882708	1	protein_coding	10887	PROKR1	5.42251256340407e-10	NA	0	0	0	NA	NA	NA	NA	Yes	hESC:IMR90:Mesenchymal_Stem_Cell:Mesendoderm	0.0001318	rs11126201	6
ENSG00000163219	ARHGAP25	2	68906733	69053965	1	protein_coding	9938	ARHGAP25	0.438207321068152	0.310749694	5	2.859	4	-9	0.049	CMC_NoSVA_cis:CMC_SVA_cis	-	Yes	IMR90:Mesenchymal_Stem_Cell	2.389e-06	rs11126201	6
ENSG00000237576	AC097495.2	2	69059176	69064856	1	antisense	NA	NA	NA	NA	5	2.859	0	NA	NA	NA	NA	No	NA	2.389e-06	rs11126201	6
ENSG00000228329	AC097495.3	2	69059948	69064324	-1	lincRNA	105374791	LINC01890	NA	NA	5	2.859	5	5.66184e-08	9.97984e-11	GTEx_v7_Testis	-	No	NA	2.389e-06	rs11126201	6
ENSG00000163217	BMP10	2	69092613	69098649	-1	protein_coding	27302	BMP10	0.722716219511508	-0.084535052	5	2.859	0	NA	NA	NA	NA	No	NA	2.389e-06	rs11126201	6
ENSG00000183607	GKN2	2	69172364	69180102	-1	protein_coding	200504	GKN2	0.000143060405510152	0.199162189	0	0	0	NA	NA	NA	NA	Yes	IMR90:Mesenchymal_Stem_Cell:Mesendoderm	0.0001318	rs11126201	6
ENSG00000169604	ANTXR1	2	69240310	69476459	1	protein_coding	84168	ANTXR1	0.98528320310747	-0.950055114	0	0	0	NA	NA	NA	NA	Yes	IMR90:Mesenchymal_Stem_Cell:Mesendoderm	0.0001318	rs11126201	6
ENSG00000233605	AC073628.1	2	78143060	78145135	1	lincRNA	101927926	LINC01851	NA	NA	12	12.29	0	NA	NA	NA	NA	No	NA	2.983e-06	rs6747064	7
ENSG00000227479	AC124861.1	2	241166977	241195452	-1	lincRNA	NA	NA	NA	NA	1	0.057	0	NA	NA	NA	NA	No	NA	3.896e-06	rs4854101	8
ENSG00000235978	AC018816.3	3	4855978	4928977	-1	protein_coding	NA	NA	NA	NA	5	8.606	0	NA	NA	NA	NA	No	NA	9.009e-06	rs4684453	9
ENSG00000235831	BHLHE40-AS1	3	4938493	5021646	-1	antisense	100507582	BHLHE40-AS1	NA	NA	5	8.606	0	NA	NA	NA	NA	No	NA	9.009e-06	rs4684453	9
ENSG00000134107	BHLHE40	3	5020801	5027008	1	protein_coding	8553	BHLHE40	0.941607017631946	1.063534091	5	8.606	0	NA	NA	NA	NA	No	NA	9.009e-06	rs4684453	9
ENSG00000134109	EDEM1	3	5229331	5261642	1	protein_coding	9695	EDEM1	5.59576418489089e-11	2.009808808	0	0	1	4.17971e-07	0.000143193	GTEx_v7_Brain_Cerebellar_Hemisphere	-	No	NA	0.001016	rs4684453	9
ENSG00000114200	BCHE	3	165490692	165555260	-1	protein_coding	590	BCHE	4.44441991561661e-11	0.357928377	0	0	6	1.24231e-05	0.0337075	GTEx_v7_Stomach	-	No	NA	7.37e-08	rs7649061	10
ENSG00000224962	PSAT1P4	3	166408975	166409503	1	pseudogene	100287630	PSAT1P4	NA	NA	9	4.589	0	NA	NA	NA	NA	No	NA	7.37e-08	rs7649061;rs73880644	10
ENSG00000240458	RP11-450H5.3	3	166439246	166439398	1	pseudogene	NA	NA	NA	NA	16	12.29	0	NA	NA	NA	NA	No	NA	7.37e-08	rs7649061;rs73880644	10
ENSG00000231516	CBX1P5	3	166528797	166529355	1	pseudogene	100133259	CBX1P5	NA	NA	29	4.772	0	NA	NA	NA	NA	No	NA	6.445e-07	rs73880644;rs7615817;rs9862464	10
ENSG00000240033	RP11-12K11.2	3	166552809	166562744	-1	lincRNA	NA	NA	NA	NA	29	4.772	0	NA	NA	NA	NA	No	NA	6.445e-07	rs73880644;rs7615817;rs9862464	10
ENSG00000239227	RP11-12K11.1	3	166579732	166579898	1	pseudogene	NA	NA	NA	NA	22	3.588	0	NA	NA	NA	NA	No	NA	2.168e-06	rs9862464	10
ENSG00000152492	CCDC50	3	191046866	191116459	1	protein_coding	152137	CCDC50	9.33289305733199e-06	0.107292874	0	0	1	3.51567e-05	0.0272327	GTEx_v7_Lung	+	No	NA	6.838e-06	rs2643063	11
ENSG00000152208	GRID2	4	93225550	94695707	1	protein_coding	2895	GRID2	0.999998446555818	-0.76016799	2	7.214	0	NA	NA	NA	NA	No	NA	7.078e-06	rs79243722;rs146860029	12
ENSG00000251449	MTND1P19	4	93623496	93623810	1	pseudogene	100873220	MTND1P19	NA	NA	2	7.214	0	NA	NA	NA	NA	No	NA	7.078e-06	rs79243722;rs146860029	12
ENSG00000214559	RP11-323J4.1	4	99172839	99182781	-1	antisense	NA	NA	NA	NA	0	0	0	NA	NA	NA	NA	Yes	IMR90:Mesenchymal_Stem_Cell	1.387e-05	rs6822279	13
ENSG00000138698	RAP1GDS1	4	99182535	99365012	1	protein_coding	5910	RAP1GDS1	0.824878144875972	NA	0	0	0	NA	NA	NA	NA	Yes	IMR90:Mesenchymal_Stem_Cell	1.387e-05	rs6822279	13
ENSG00000168785	TSPAN5	4	99391518	99579780	-1	protein_coding	10098	TSPAN5	0.927948896697443	-0.439719003	0	0	0	NA	NA	NA	NA	Yes	hESC:IMR90:Left_Ventricle:Mesenchymal_Stem_Cell:Mesendoderm:Trophoblast-like_Cell	1.387e-05	rs6822279	13
ENSG00000260641	RP11-1299A16.3	4	99580055	99585701	1	antisense	NA	NA	NA	NA	0	0	0	NA	NA	NA	NA	Yes	hESC:IMR90:Left_Ventricle:Mesenchymal_Stem_Cell:Mesendoderm:Trophoblast-like_Cell	1.387e-05	rs6822279	13
ENSG00000151247	EIF4E	4	99792835	99851788	-1	protein_coding	1977	EIF4E	0.983573342194326	0.732919324	1	3.81	1	-9	0.009	CMC_SVA_cis	-	Yes	Mesenchymal_Stem_Cell	9.876e-06	rs6822279	13
ENSG00000263923	RP11-571L19.7	4	99850048	99916145	1	antisense	NA	NA	NA	NA	0	0	0	NA	NA	NA	NA	Yes	Mesenchymal_Stem_Cell	1.387e-05	rs6822279	13
ENSG00000238449	AC019131.1	4	99851074	99851138	-1	miRNA	NA	NA	NA	NA	0	0	0	NA	NA	NA	NA	Yes	Mesenchymal_Stem_Cell	1.387e-05	rs6822279	13
ENSG00000197894	ADH5	4	99992132	100009952	-1	protein_coding	128	ADH5	9.11477880080588e-07	2.344299085	0	0	1	8.10249e-06	2.44284e-19	GTEx_v7_Muscle_Skeletal	-	No	NA	9.876e-06	rs6822279	13
ENSG00000246090	RP11-696N14.1	4	100010008	100222513	1	antisense	100507053	LOC100507053	NA	NA	0	0	1	1.29917e-05	1.52646e-13	GTEx_v7_Adipose_Subcutaneous:GTEx_v7_Lung:GTEx_v7_Skin_Not_Sun_Exposed_Suprapubic:GTEx_v7_Skin_Sun_Exposed_Lower_leg	+	No	NA	9.876e-06	rs6822279	13
ENSG00000250215	CIR1P2	4	115634735	115636076	-1	pseudogene	100131828	CIR1P2	NA	NA	0	0	6	1.26075e-05	0.0138073	GTEx_v7_Pancreas	-	No	NA	0.004834	rs6819524	14
ENSG00000138653	NDST4	4	115748919	116035032	-1	protein_coding	64579	NDST4	0.0823391729749423	-0.435899271	0	0	0	NA	NA	NA	NA	Yes	hESC:Mesenchymal_Stem_Cell:Mesendoderm	0.005951	rs6819524	14
ENSG00000250693	RPF2P2	4	116549968	116550863	1	pseudogene	100128462	RPF2P2	NA	NA	7	9.666	0	NA	NA	NA	NA	No	NA	3.442e-06	rs6819524	14
ENSG00000248488	PGAM4P2	4	116685255	116685975	-1	pseudogene	100131611	PGAM4P2	NA	NA	14	10.62	0	NA	NA	NA	NA	No	NA	0.003226	rs6819524	14
ENSG00000145708	CRHBP	5	76248538	76276983	1	protein_coding	1393	CRHBP	0.989594470418958	-0.435834082	1	0.084	0	NA	NA	NA	NA	No	NA	3.963e-06	rs73764616	15
ENSG00000164252	AGGF1	5	76325076	76361059	1	protein_coding	55109	AGGF1	6.09962982121775e-05	-0.704749026	1	0.084	0	NA	NA	NA	NA	No	NA	3.963e-06	rs73764616	15
ENSG00000244245	RP11-120B7.1	5	107929310	107929668	1	pseudogene	NA	NA	NA	NA	3	6.854	0	NA	NA	NA	NA	No	NA	8.741e-06	rs79414964	16
ENSG00000170445	HARS	5	140052758	140071609	-1	protein_coding	3035	HARS	0.000736050889038717	-1.342137442	2	0.436	0	NA	NA	NA	NA	No	NA	2.077e-06	5:140208927	18
ENSG00000112855	HARS2	5	140071011	140078889	1	protein_coding	23438	HARS2	8.12767561165649e-05	-0.908738202	5	8.361	0	NA	NA	NA	NA	No	NA	2.077e-06	5:140208927	18
ENSG00000146007	ZMAT2	5	140078265	140086248	1	protein_coding	153527	ZMAT2	0.971433760073875	-0.225027712	7	13.6	0	NA	NA	NA	NA	No	NA	2.077e-06	5:140208927	18
ENSG00000199990	VTRNA1-1	5	140090860	140090958	1	misc_RNA	56664	VTRNA1-1	NA	NA	7	13.6	0	NA	NA	NA	NA	No	NA	2.077e-06	5:140208927	18
ENSG00000202111	VTRNA1-2	5	140098510	140098598	1	misc_RNA	56663	VTRNA1-2	NA	NA	8	13.6	0	NA	NA	NA	NA	No	NA	2.077e-06	5:140208927	18
ENSG00000202515	VTRNA1-3	5	140105743	140105831	1	misc_RNA	56662	VTRNA1-3	NA	NA	10	13.6	0	NA	NA	NA	NA	No	NA	1.692e-06	5:140208927	18
ENSG00000250515	RP11-515C16.7	5	140111875	140112448	-1	pseudogene	NA	NA	NA	NA	10	13.6	0	NA	NA	NA	NA	No	NA	1.692e-06	5:140208927	18
ENSG00000248106	AC005609.2	5	140143695	140144406	1	pseudogene	NA	NA	NA	NA	10	13.6	0	NA	NA	NA	NA	No	NA	1.692e-06	5:140208927	18
ENSG00000204970	PCDHA1	5	140165876	140391929	1	protein_coding	56147	PCDHA1	0.000559474715442591	-0.840725288	12	13.6	0	NA	NA	NA	NA	No	NA	4.072e-07	5:140208927	18
ENSG00000204969	PCDHA2	5	140174444	140391929	1	protein_coding	56146	PCDHA2	1.98580542965182e-09	-0.824134341	9	13.6	0	NA	NA	NA	NA	No	NA	4.072e-07	5:140208927	18
ENSG00000255408	PCDHA3	5	140180783	140391929	1	protein_coding	56145	PCDHA3	1.46196613178525e-13	0.002122533	7	13.6	0	NA	NA	NA	NA	No	NA	4.072e-07	5:140208927	18
ENSG00000204967	PCDHA4	5	140186659	140391929	1	protein_coding	56144	PCDHA4	2.8753730977395e-15	-0.62227883	5	6.688	0	NA	NA	NA	NA	No	NA	4.072e-07	5:140208927	18
ENSG00000204965	PCDHA5	5	140201222	140391929	1	protein_coding	56143	PCDHA5	0.00353824820282254	-0.181196298	3	6.688	0	NA	NA	NA	NA	No	NA	4.072e-07	5:140208927	18
ENSG00000081842	PCDHA6	5	140207563	140391929	1	protein_coding	56142	PCDHA6	6.16174888872113e-08	-0.972356063	2	4.428	0	NA	NA	NA	NA	No	NA	4.072e-07	5:140208927	18
ENSG00000204963	PCDHA7	5	140213969	140391929	1	protein_coding	56141	PCDHA7	0.000137151933946153	-0.427091079	2	4.428	0	NA	NA	NA	NA	No	NA	4.072e-07	5:140208927	18
ENSG00000204962	PCDHA8	5	140220907	140391929	1	protein_coding	56140	PCDHA8	3.70119875231036e-10	-0.652196065	2	4.428	0	NA	NA	NA	NA	No	NA	4.072e-07	5:140208927	18
ENSG00000204961	PCDHA9	5	140227048	140391929	1	protein_coding	9752	PCDHA9	7.8893945081967e-14	-0.676833696	2	4.428	0	NA	NA	NA	NA	No	NA	4.072e-07	5:140208927	18
ENSG00000250120	PCDHA10	5	140235595	140391929	1	protein_coding	56139	PCDHA10	4.18271816069149e-11	-0.910087283	2	4.428	0	NA	NA	NA	NA	No	NA	4.072e-07	5:140208927	18
ENSG00000249034	AC005609.1	5	140240341	140243224	-1	protein_coding	NA	NA	NA	NA	2	4.428	0	NA	NA	NA	NA	No	NA	4.072e-07	5:140208927	18
ENSG00000249504	PCDHA14	5	140240860	140243104	1	pseudogene	26307	PCDHA14	NA	NA	2	4.428	0	NA	NA	NA	NA	No	NA	4.072e-07	5:140208927	18
ENSG00000249158	PCDHA11	5	140248689	140391929	1	protein_coding	56138	PCDHA11	3.59325181225576e-10	-0.641249057	2	4.428	0	NA	NA	NA	NA	No	NA	4.072e-07	5:140208927	18
ENSG00000251664	PCDHA12	5	140255058	140391929	1	protein_coding	56137	PCDHA12	3.51762607400118e-10	-0.630755362	2	4.428	0	NA	NA	NA	NA	No	NA	4.072e-07	5:140208927	18
ENSG00000239389	PCDHA13	5	140261793	140391929	1	protein_coding	56136	PCDHA13	4.28546861491057e-11	-0.705577244	1	1.245	0	NA	NA	NA	NA	No	NA	7.158e-07	5:140208927	18
ENSG00000168246	UBTD2	5	171636644	171711075	-1	protein_coding	92181	UBTD2	0.748758501654584	0.489716427	0	0	3	-9	0.009	CMC_SVA_cis	+	No	NA	0.0004018	5:171912171	20
ENSG00000174705	SH3PXD2B	5	171752185	171881527	-1	protein_coding	285590	SH3PXD2B	0.0185367927997724	0.473773252	5	5.749	3	7.72366e-17	0	BIOS_eQTL_geneLevel	-	No	NA	7.154e-06	5:171912171	20
ENSG00000216127	AC011407.1	5	171866667	171866758	-1	miRNA	NA	NA	NA	NA	5	5.749	0	NA	NA	NA	NA	No	NA	7.154e-06	5:171912171	20
ENSG00000223342	RP3-429O6.1	6	6901255	6918948	-1	lincRNA	NA	NA	NA	NA	1	0.292	0	NA	NA	NA	NA	No	NA	5.886e-06	rs6934349	21
ENSG00000240936	RN7SL554P	6	6938835	6939130	-1	misc_RNA	106479423	RN7SL554P	NA	NA	1	0.292	0	NA	NA	NA	NA	No	NA	5.886e-06	rs6934349	21
ENSG00000199932	RNU1-18P	6	122532794	122532957	1	snRNA	100873815	RNU1-18P	NA	NA	1	4.287	0	NA	NA	NA	NA	No	NA	0.00138	rs699402	22
ENSG00000025156	HSF2	6	122720691	122754264	1	protein_coding	3298	HSF2	0.919340110510229	-0.603831964	0	0	2	5.37757e-13	0	BIOS_eQTL_geneLevel	+	No	NA	1.242e-06	rs699402	22
ENSG00000111897	SERINC1	6	122764499	122792967	-1	protein_coding	57515	SERINC1	0.0746214563362831	0.168754862	0	0	2	5.07972e-06	7.52694e-05	GTEx_v7_Esophagus_Mucosa	+	No	NA	1.242e-06	rs699402	22
ENSG00000152894	PTPRK	6	128289924	128841870	-1	protein_coding	5796	PTPRK	0.980388546226756	-0.479546584	1	4.601	1	1.03285547611768e-05	0.04811953	GTEx_v6_Colon_Sigmoid	NA	No	NA	0.0003694	rs59322395	23
ENSG00000224733	RP1-86D1.5	6	128821672	128822321	1	antisense	NA	NA	NA	NA	1	4.601	0	NA	NA	NA	NA	No	NA	0.0003694	rs59322395	23
ENSG00000227112	RP1-86D1.4	6	128826270	128827421	1	antisense	NA	NA	NA	NA	1	4.601	0	NA	NA	NA	NA	No	NA	0.0003694	rs59322395	23
ENSG00000213130	EEF1DP5	6	128901258	128902029	-1	pseudogene	442258	EEF1DP5	NA	NA	13	7.463	0	NA	NA	NA	NA	No	NA	2.14e-06	rs59322395;rs76515539;rs76865199	23
ENSG00000206982	Y_RNA	6	128905535	128905636	1	misc_RNA	NA	NA	NA	NA	12	7.463	0	NA	NA	NA	NA	No	NA	2.14e-06	rs76515539;rs76865199;rs59322395	23
ENSG00000238938	snoU13	6	128934346	128934452	1	snoRNA	NA	NA	NA	NA	12	7.463	0	NA	NA	NA	NA	No	NA	2.14e-06	rs76515539;rs76865199;rs59322395	23
ENSG00000220110	RP1-6P5.2	6	128960333	128960798	-1	pseudogene	NA	NA	NA	NA	11	7.463	0	NA	NA	NA	NA	No	NA	2.14e-06	rs76865199;rs59322395	23
ENSG00000146477	SLC22A3	6	160769300	160876014	1	protein_coding	6581	SLC22A3	3.31638540911901e-05	0.310629054	0	0	1	7.7436e-05	0.0426059888640449	BIOS_eQTL_geneLevel	+	No	NA	1.114e-05	rs7450411	24
ENSG00000213071	LPAL2	6	160874460	160932156	-1	pseudogene	80350	LPAL2	NA	NA	1	1.468	1	7.7436e-05	0.0426059888640449	BIOS_eQTL_geneLevel	+	No	NA	1.114e-05	rs7450411	24
ENSG00000198670	LPA	6	160952515	161087407	-1	protein_coding	4018	LPA	2.4422277924849e-32	0.042144435	11	6.92	10	1.51394e-16	0	GTEx_v7_Esophagus_Mucosa:BIOS_eQTL_geneLevel	-	No	NA	9.515e-06	rs7450411	24
ENSG00000128595	CALU	7	128379346	128411861	1	protein_coding	813	CALU	0.447140101291407	-0.157875851	0	0	0	NA	NA	NA	NA	Yes	GM12878:Mesenchymal_Stem_Cell	NA	rs4728159	25
ENSG00000128604	IRF5	7	128577666	128590089	1	protein_coding	3663	IRF5	0.288476015651223	NA	0	0	0	NA	NA	NA	NA	Yes	GM12878:IMR90:Mesenchymal_Stem_Cell:Trophoblast-like_Cell	NA	rs4728159	25
ENSG00000244556	ODCP	7	128668943	128670581	1	pseudogene	4954	ODCP	NA	NA	0	0	0	NA	NA	NA	NA	Yes	GM12878:IMR90:Mesenchymal_Stem_Cell:Mesendoderm	NA	rs4728159	25
ENSG00000158457	TSPAN33	7	128784712	128808671	1	protein_coding	340348	TSPAN33	0.000103178201876671	0.982621066	3	4.078	0	NA	NA	NA	NA	Yes	Mesenchymal_Stem_Cell	6.071e-07	rs4728159	25
ENSG00000240685	RP11-286H14.6	7	128808053	128809538	1	sense_overlapping	NA	NA	NA	NA	5	4.078	0	NA	NA	NA	NA	Yes	IMR90	6.071e-07	rs4728159	25
ENSG00000128602	SMO	7	128828713	128853386	1	protein_coding	6608	SMO	0.0637118150614874	NA	21	12.84	0	NA	NA	NA	NA	Yes	IMR90	6.071e-07	rs4728159;rs190614966	25
ENSG00000243230	RP11-286H14.8	7	128849616	128853386	-1	antisense	NA	NA	NA	NA	21	12.84	0	NA	NA	NA	NA	No	NA	6.071e-07	rs4728159;rs190614966	25
ENSG00000158467	AHCYL2	7	128864864	129070052	1	protein_coding	23382	AHCYL2	0.949258836025037	-0.556508126	23	12.84	0	NA	NA	NA	NA	No	NA	6.071e-07	rs4728159;rs190614966	25
ENSG00000252280	RNU7-16P	7	129045476	129045537	1	snRNA	100147764	RNU7-16P	NA	NA	0	0	0	NA	NA	NA	NA	Yes	hESC:IMR90:Mesenchymal_Stem_Cell:Mesendoderm:Trophoblast-like_Cell	0.001025	rs4728159	25
ENSG00000128578	STRIP2	7	129074274	129128240	1	protein_coding	57464	STRIP2	7.35176598741971e-10	-0.301291227	0	0	0	NA	NA	NA	NA	Yes	hESC:IMR90:Mesenchymal_Stem_Cell:Mesendoderm:Trophoblast-like_Cell	0.001025	rs4728159	25
ENSG00000240204	SMKR1	7	129142320	129152773	1	protein_coding	100287482	SMKR1	NA	NA	0	0	1	5.96545e-07	6.25079e-08	GTEx_v7_Testis	-	Yes	IMR90:Mesenchymal_Stem_Cell:Mesendoderm	2.521e-05	rs190614966;rs4728159	25
ENSG00000273329	RP11-448A19.1	7	129244389	129251471	-1	lincRNA	NA	NA	NA	NA	0	0	0	NA	NA	NA	NA	Yes	IMR90:Mesenchymal_Stem_Cell:Mesendoderm:Trophoblast-like_Cell	0.001025	rs4728159	25
ENSG00000106459	NRF1	7	129251555	129396922	1	protein_coding	4899	NRF1	0.996970242690309	-0.678127541	0	0	0	NA	NA	NA	NA	Yes	IMR90:Mesenchymal_Stem_Cell:Mesendoderm:Trophoblast-like_Cell	0.001025	rs4728159	25
ENSG00000242078	RP11-738B7.1	7	129423210	129425025	-1	lincRNA	NA	NA	NA	NA	0	0	0	NA	NA	NA	NA	Yes	Mesenchymal_Stem_Cell	NA	rs4728159	25
ENSG00000186591	UBE2H	7	129470572	129592789	-1	protein_coding	7328	UBE2H	0.970971739459398	-1.743014604	0	0	0	NA	NA	NA	NA	Yes	IMR90:Mesenchymal_Stem_Cell	NA	rs4728159	25
ENSG00000244036	RP11-306G20.1	7	129593074	129666391	1	antisense	NA	NA	NA	NA	0	0	0	NA	NA	NA	NA	Yes	IMR90:Mesenchymal_Stem_Cell	NA	rs4728159	25
ENSG00000158623	COPG2	7	130146089	130353598	-1	protein_coding	26958	COPG2	0.0560373568810472	NA	0	0	0	NA	NA	NA	NA	Yes	IMR90:Mesenchymal_Stem_Cell	NA	rs4728159	25
ENSG00000174595	KLF14	7	130417401	130418888	-1	protein_coding	136259	KLF14	0.21811382303303	NA	0	0	0	NA	NA	NA	NA	Yes	IMR90:Mesenchymal_Stem_Cell	NA	rs4728159	25
ENSG00000229858	AC016831.5	7	130507627	130507978	-1	pseudogene	NA	NA	NA	NA	0	0	0	NA	NA	NA	NA	Yes	Mesenchymal_Stem_Cell	NA	rs4728159	25
ENSG00000117868	ESYT2	7	158523686	158622944	-1	protein_coding	57488	ESYT2	0.00844095092621287	3.928779606	2	1.796	0	NA	NA	NA	NA	No	NA	5.47e-07	rs6978311	26
ENSG00000126870	WDR60	7	158649269	158749438	1	protein_coding	55112	WDR60	2.00913621845281e-07	1.057766073	6	5.788	0	NA	NA	NA	NA	No	NA	5.47e-07	rs6978311	26
ENSG00000238496	snoU13	8	9789230	9789333	-1	snoRNA	NA	NA	NA	NA	2	7.463	0	NA	NA	NA	NA	No	NA	2.125e-06	rs113394492	27
ENSG00000147481	SNTG1	8	50822349	51706678	1	protein_coding	54212	SNTG1	0.0379275653329757	1.293728298	0	0	0	NA	NA	NA	NA	Yes	hESC:IMR90:Mesenchymal_Stem_Cell:Mesendoderm	0.0004986	rs28890775	28
ENSG00000253664	RP11-401H2.1	8	52170248	52233678	1	antisense	NA	NA	NA	NA	8	5.643	0	NA	NA	NA	NA	No	NA	3.561e-07	rs28890775	28
ENSG00000147485	PXDNL	8	52232138	52722005	-1	protein_coding	137902	PXDNL	1.93677107008286e-27	-0.00524853	2	0.162	0	NA	NA	NA	NA	Yes	hESC:Mesendoderm	3.561e-07	rs28890775	28
ENSG00000176571	CNBD1	8	87878670	88627447	1	protein_coding	168975	CNBD1	2.81654403463771e-10	-0.058729355	252	13.96	0	NA	NA	NA	NA	No	NA	2.769e-07	rs13248225;rs4961035;rs67620422;rs3922614;rs28841989;rs13268575	29
ENSG00000156103	MMP16	8	89044237	89340254	-1	protein_coding	4325	MMP16	0.916974083764173	-3.432432894	0	0	0	NA	NA	NA	NA	Yes	Mesendoderm	1.712e-06	rs67620422:rs4961035:rs3922614	29
ENSG00000253553	RP11-586K2.1	8	89339065	89749363	1	antisense	NA	NA	NA	NA	0	0	0	NA	NA	NA	NA	Yes	Mesendoderm	1.712e-06	rs67620422:rs4961035:rs3922614	29
ENSG00000247844	CCAT1	8	128220111	128231333	-1	lincRNA	100507056	CCAT1	NA	NA	0	0	0	NA	NA	NA	NA	Yes	GM12878:hESC:IMR90:Liver:Mesenchymal_Stem_Cell:Mesendoderm	6.338e-05	rs74815096	30
ENSG00000249375	CASC11	8	128698588	128746213	-1	lincRNA	100270680	CASC11	NA	NA	0	0	0	NA	NA	NA	NA	Yes	GM12878:hESC:IMR90:Left_Ventricle:Liver:Mesenchymal_Stem_Cell:Mesendoderm	6.338e-05	rs74815096	30
ENSG00000136997	MYC	8	128747680	128753674	1	protein_coding	4609	MYC	NA	-0.253124713	0	0	0	NA	NA	NA	NA	Yes	GM12878:hESC:IMR90:Left_Ventricle:Liver:Mesenchymal_Stem_Cell:Mesendoderm	6.338e-05	rs74815096	30
ENSG00000253926	RP11-26E5.1	8	130428195	130458098	1	lincRNA	NA	NA	NA	NA	0	0	0	NA	NA	NA	NA	Yes	IMR90:Mesenchymal_Stem_Cell:Mesendoderm	6.338e-05	rs74815096	30
ENSG00000254223	RP11-419K12.1	8	130691381	130695925	-1	lincRNA	NA	NA	NA	NA	0	0	0	NA	NA	NA	NA	Yes	hESC:IMR90:Mesenchymal_Stem_Cell:Mesendoderm:Pancreas:Trophoblast-like_Cell	6.338e-05	rs74815096	30
ENSG00000147697	GSDMC	8	130760442	130799134	-1	protein_coding	56169	GSDMC	9.34939571735548e-12	-0.067346334	0	0	0	NA	NA	NA	NA	Yes	IMR90	6.338e-05	rs74815096	30
ENSG00000106733	NMRK1	9	77675489	77703133	-1	protein_coding	54981	NMRK1	0.00106636786756072	NA	0	0	0	NA	NA	NA	NA	Yes	hESC:Mesendoderm	5.868e-06	rs28687781	31
ENSG00000134996	OSTF1	9	77703459	77762181	1	protein_coding	26578	OSTF1	0.666040393255519	NA	0	0	0	NA	NA	NA	NA	Yes	hESC:Mesendoderm	5.868e-06	rs28687781	31
ENSG00000099139	PCSK5	9	78505560	78977255	1	protein_coding	5125	PCSK5	0.000207778974917015	1.175306731	7	9.188	0	NA	NA	NA	NA	No	NA	5.325e-06	rs28687781	31
ENSG00000238826	AL359253.1	9	78527369	78527465	1	miRNA	NA	NA	NA	NA	7	9.188	0	NA	NA	NA	NA	No	NA	5.325e-06	rs28687781	31
ENSG00000204612	FOXB2	9	79634571	79635869	1	protein_coding	442425	FOXB2	2.39247928093334e-06	-0.255425962	0	0	0	NA	NA	NA	NA	Yes	IMR90:Mesenchymal_Stem_Cell	5.868e-06	rs28687781	31
ENSG00000056586	RC3H2	9	125606835	125667620	-1	protein_coding	54542	RC3H2	0.999999562144921	-1.598703746	0	0	0	NA	NA	NA	NA	Yes	IMR90	5.591e-06	rs58733878	32
ENSG00000186130	ZBTB6	9	125670335	125675609	-1	protein_coding	10773	ZBTB6	0.357932618205793	0.135577365	0	0	0	NA	NA	NA	NA	Yes	IMR90	5.591e-06	rs58733878	32
ENSG00000225078	RP11-123N4.4	9	125824124	125825591	-1	pseudogene	NA	NA	NA	NA	0	0	0	NA	NA	NA	NA	Yes	Mesenchymal_Stem_Cell	5.591e-06	rs58733878	32
ENSG00000106689	LHX2	9	126763949	126795580	1	protein_coding	9355	LHX2	0.946789688867038	NA	0	0	0	NA	NA	NA	NA	Yes	IMR90:Mesenchymal_Stem_Cell:Mesendoderm:Trophoblast-like_Cell	5.591e-06	rs58733878	32
ENSG00000236668	RP11-85O21.2	9	126768556	126771675	-1	antisense	100505588	LOC100505588	NA	NA	0	0	0	NA	NA	NA	NA	Yes	IMR90:Mesenchymal_Stem_Cell:Mesendoderm:Trophoblast-like_Cell	5.591e-06	rs58733878	32
ENSG00000231227	RP11-85O21.4	9	126772809	126773393	1	sense_overlapping	NA	NA	NA	NA	0	0	0	NA	NA	NA	NA	Yes	IMR90:Mesenchymal_Stem_Cell:Mesendoderm:Trophoblast-like_Cell	5.591e-06	rs58733878	32
ENSG00000234921	RP11-85O21.5	9	126793903	126794803	-1	antisense	NA	NA	NA	NA	0	0	0	NA	NA	NA	NA	Yes	IMR90:Mesenchymal_Stem_Cell:Mesendoderm:Trophoblast-like_Cell	5.591e-06	rs58733878	32
ENSG00000119408	NEK6	9	127019885	127115586	1	protein_coding	10783	NEK6	0.644137660973949	-0.314011321	0	0	0	NA	NA	NA	NA	Yes	GM12878:IMR90	5.591e-06	rs58733878	32
ENSG00000224020	MIR181A2HG	9	127420746	127460910	1	antisense	100379345	MIR181A2HG	NA	NA	0	0	0	NA	NA	NA	NA	Yes	Mesenchymal_Stem_Cell	5.591e-06	rs58733878	32
ENSG00000233721	RP11-205K6.1	9	129278696	129281087	1	lincRNA	105376276	LOC105376276	NA	NA	0	0	0	NA	NA	NA	NA	Yes	Left_Ventricle	5.591e-06	rs58733878	32
ENSG00000126883	NUP214	9	134000948	134110057	1	protein_coding	8021	NUP214	0.993841692882668	-1.089990211	0	0	0	NA	NA	NA	NA	Yes	GM12878:IMR90:Left_Ventricle:Liver:Mesenchymal_Stem_Cell	9.436e-07	rs11794161	33
ENSG00000226987	RP11-544A12.5	9	134116074	134117111	1	pseudogene	NA	NA	NA	NA	0	0	0	NA	NA	NA	NA	Yes	IMR90:Left_Ventricle:Mesenchymal_Stem_Cell	0.0002704	rs11794161	33
ENSG00000126882	FAM78A	9	134133463	134151934	-1	protein_coding	286336	FAM78A	0.480800490723991	-1.029976595	0	0	0	NA	NA	NA	NA	Yes	Left_Ventricle	0.0002704	rs11794161	33
ENSG00000176868	AL358781.1	9	134374796	134375537	-1	pseudogene	NA	NA	NA	NA	0	0	0	NA	NA	NA	NA	Yes	hESC:IMR90:Left_Ventricle:Lung:Mesenchymal_Stem_Cell:Trophoblast-like_Cell	9.436e-07	rs11794161	33
ENSG00000130714	POMT1	9	134378289	134399193	1	protein_coding	10585	POMT1	4.99835474252924e-10	0.250467852	0	0	9	8.64318e-06	0.00594837261503928	BIOS_eQTL_geneLevel	-	Yes	hESC:IMR90:Left_Ventricle:Lung:Mesenchymal_Stem_Cell:Trophoblast-like_Cell	9.436e-07	rs11794161	33
ENSG00000130717	UCK1	9	134399188	134406655	-1	protein_coding	83549	UCK1	0.00212663067332242	-0.588264714	0	0	0	NA	NA	NA	NA	Yes	GM12878:hESC:IMR90:Left_Ventricle:Mesenchymal_Stem_Cell:Mesendoderm:Pancreas:Right_Ventricle:Spleen:Trophoblast-like_Cell	9.436e-07	rs11794161	33
ENSG00000107263	RAPGEF1	9	134452157	134615461	-1	protein_coding	2889	RAPGEF1	0.999914749689066	-1.486305758	10	10.86	10	-9	0	GTEx_v6_Cells_Transformed_fibroblasts:GTEx_v6_Whole_Blood:GTEx_v7_Cells_Transformed_fibroblasts:GTEx_v7_Heart_Atrial_Appendage:GTEx_v7_Pancreas:GTEx_v7_Skin_Sun_Exposed_Lower_leg:GTEx_v7_Thyroid:BIOS_eQTL_geneLevel:CMC_SVA_cis	+	Yes	GM12878	9.436e-07	rs11794161	33
ENSG00000240853	RN7SL328P	9	134600556	134600854	-1	misc_RNA	106481837	RN7SL328P	NA	NA	9	10.86	0	NA	NA	NA	NA	No	NA	0.0002704	rs11794161	33
ENSG00000160563	MED27	9	134735494	134955295	-1	protein_coding	9442	MED27	0.00360424731766106	-0.209969227	0	0	0	NA	NA	NA	NA	Yes	hESC:IMR90:Mesenchymal_Stem_Cell:Mesendoderm	9.436e-07	rs11794161	33
ENSG00000196358	NTNG2	9	135037334	135119921	1	protein_coding	84628	NTNG2	0.829583230038295	0.019324245	0	0	0	NA	NA	NA	NA	Yes	IMR90:Mesenchymal_Stem_Cell:Mesendoderm:Trophoblast-like_Cell	9.436e-07	rs11794161	33
ENSG00000107290	SETX	9	135136743	135230372	-1	protein_coding	23064	SETX	0.200249583810895	0.537760012	0	0	0	NA	NA	NA	NA	Yes	Mesenchymal_Stem_Cell	0.0002704	rs11794161	33
ENSG00000125482	TTF1	9	135251008	135282209	-1	protein_coding	7270	TTF1	1.47325071683527e-06	0.123753394	0	0	0	NA	NA	NA	NA	Yes	Mesenchymal_Stem_Cell	0.0002704	rs11794161	33
ENSG00000188523	C9orf171	9	135285430	135448704	1	protein_coding	389799	C9orf171	5.9147238133923e-07	0.302045172	0	0	0	NA	NA	NA	NA	Yes	Mesenchymal_Stem_Cell	0.0002704	rs11794161	33
ENSG00000125485	DDX31	9	135468384	135545788	-1	protein_coding	64794	DDX31	2.75575676923568e-06	-0.899017337	0	0	0	NA	NA	NA	NA	Yes	hESC:Mesenchymal_Stem_Cell:Trophoblast-like_Cell	9.436e-07	rs11794161	33
ENSG00000125484	GTF3C4	9	135545422	135570342	1	protein_coding	9329	GTF3C4	0.0149762555569875	0.796705006	0	0	0	NA	NA	NA	NA	Yes	hESC:Mesenchymal_Stem_Cell:Trophoblast-like_Cell	9.436e-07	rs11794161	33
ENSG00000165699	TSC1	9	135766735	135820020	-1	protein_coding	7248	TSC1	0.999978334212389	0.226682835	0	0	0	NA	NA	NA	NA	Yes	Mesenchymal_Stem_Cell	0.0002704	rs11794161	33
ENSG00000165702	GFI1B	9	135820932	135867083	1	protein_coding	8328	GFI1B	0.0128387744473726	1.337950017	0	0	0	NA	NA	NA	NA	Yes	Mesenchymal_Stem_Cell	0.0002704	rs11794161	33
ENSG00000263816	MIR548AW	9	135821094	135821158	1	miRNA	100846992	MIR548AW	NA	NA	0	0	0	NA	NA	NA	NA	Yes	Mesenchymal_Stem_Cell	0.0002704	rs11794161	33
ENSG00000160293	VAV2	9	136627016	136857726	-1	protein_coding	7410	VAV2	0.00251877000405443	0.240729092	4	9.658	0	NA	NA	NA	NA	Yes	IMR90	9.516e-06	rs112473634	34
ENSG00000266852	MIR4482-1	10	106028080	106028177	-1	miRNA	100616323	MIR4482-1	NA	NA	0	0	0	NA	NA	NA	NA	Yes	Mesendoderm	7.836e-06	rs7083262	35
ENSG00000065621	GSTO2	10	106028631	106064703	1	protein_coding	119391	GSTO2	1.66971146764309e-07	0.029891167	0	0	0	NA	NA	NA	NA	Yes	Mesendoderm	7.836e-06	rs7083262	35
ENSG00000156395	SORCS3	10	106400859	107024993	1	protein_coding	22986	SORCS3	0.325134263508276	0.170375294	2	10.08	0	NA	NA	NA	NA	Yes	hESC:Mesendoderm	1.233e-07	rs7095209;rs7083262	35
ENSG00000108018	SORCS1	10	108333421	108924292	-1	protein_coding	114815	SORCS1	0.969565842045511	NA	0	0	0	NA	NA	NA	NA	Yes	hESC:IMR90	7.836e-06	rs7083262	35
ENSG00000148702	HABP2	10	115310596	115349361	1	protein_coding	3026	HABP2	1.17394512031747e-14	-0.127698938	3	22.5	0	NA	NA	NA	NA	No	NA	3.184e-06	rs55729345;rs56273432;rs2270182	36
ENSG00000197893	NRAP	10	115348475	115423886	-1	protein_coding	4892	NRAP	2.58648973238176e-31	0.032613696	3	22.5	0	NA	NA	NA	NA	No	NA	3.184e-06	rs55729345;rs56273432;rs2270182	36
ENSG00000165806	CASP7	10	115438942	115490662	1	protein_coding	840	CASP7	0.000373926384361289	0.381962242	3	22.5	3	-9	1.54236e-70	xQTLServer_eQTLs:GTEx_v6_Adipose_Subcutaneous:GTEx_v6_Artery_Tibial:GTEx_v6_Cells_Transformed_fibroblasts:GTEx_v6_Heart_Left_Ventricle:GTEx_v6_Muscle_Skeletal:GTEx_v6_Nerve_Tibial:GTEx_v6_Skin_Not_Sun_Exposed_Suprapubic:GTEx_v6_Skin_Sun_Exposed_Lower_leg:GTEx_v7_Adipose_Subcutaneous:GTEx_v7_Adipose_Visceral_Omentum:GTEx_v7_Artery_Aorta:GTEx_v7_Artery_Tibial:GTEx_v7_Breast_Mammary_Tissue:GTEx_v7_C…	+	No	NA	3.184e-06	rs55729345;rs56273432;rs2270182	36
ENSG00000148735	PLEKHS1	10	115511213	115543188	1	protein_coding	79949	PLEKHS1	1.17132107467687e-15	-0.271015708	0	0	3	5.17013e-05	0.0300305151678334	BIOS_eQTL_geneLevel	-	No	NA	3.184e-06	rs55729345;rs56273432;rs2270182	36
ENSG00000183734	ASCL2	11	2289725	2292182	-1	protein_coding	430	ASCL2	0.388900409868869	NA	1	2.788	1	2.89917e-42	0	BIOS_eQTL_geneLevel	-	No	NA	3.82e-06	11:2307694	37
ENSG00000110665	C11orf21	11	2316875	2324279	-1	protein_coding	29125	C11orf21	NA	0.795294184	1	2.788	1	1.74084e-167	0	GTEx_v6_Whole_Blood:GTEx_v7_Muscle_Skeletal:GTEx_v7_Skin_Not_Sun_Exposed_Suprapubic:GTEx_v7_Whole_Blood:BIOS_eQTL_geneLevel	-	No	NA	3.82e-06	11:2307694	37
ENSG00000064201	TSPAN32	11	2323227	2339430	1	protein_coding	10077	TSPAN32	0.000537261290250421	0.111342186	1	2.788	1	1.6962e-125	0	GTEx_v6_Nerve_Tibial:GTEx_v7_Heart_Atrial_Appendage:GTEx_v7_Nerve_Tibial:BIOS_eQTL_geneLevel	+	No	NA	3.82e-06	11:2307694	37
ENSG00000207308	RNU6-878P	11	2342948	2343057	1	snRNA	106479954	RNU6-878P	NA	NA	1	2.788	0	NA	NA	NA	NA	No	NA	3.82e-06	11:2307694	37
ENSG00000238184	CD81-AS1	11	2349979	2399222	-1	processed_transcript	101927682	CD81-AS1	NA	NA	1	2.788	1	1.43801e-08	2.33358613849834e-05	BIOS_eQTL_geneLevel	-	No	NA	3.82e-06	11:2307694	37
ENSG00000236264	RPL26P30	11	2356362	2357006	-1	pseudogene	653147	RPL26P30	NA	NA	1	2.788	0	NA	NA	NA	NA	No	NA	3.82e-06	11:2307694	37
ENSG00000110651	CD81	11	2397407	2418649	1	protein_coding	975	CD81	0.950521598051911	NA	0	0	1	-9	0	BIOS_eQTL_geneLevel:CMC_SVA_cis	-	No	NA	3.82e-06	11:2307694	37
ENSG00000254757	RP13-726E6.1	11	3490549	3552558	1	lincRNA	NA	NA	NA	NA	30	7.519	0	NA	NA	NA	NA	No	NA	2.267e-06	rs116449999	38
ENSG00000255367	RP13-726E6.2	11	3502750	3602441	-1	processed_transcript	101927708	LOC101927708	NA	NA	30	7.519	1	2.6233e-11	1.84969e-21	GTEx_v6_Thyroid:GTEx_v7_Thyroid	+	No	NA	2.267e-06	rs116449999	38
ENSG00000255522	RP13-726E6.3	11	3552650	3552838	1	pseudogene	NA	NA	NA	NA	26	7.519	0	NA	NA	NA	NA	No	NA	2.267e-06	rs116449999	38
ENSG00000237226	RPS3AP39	11	3570975	3571749	-1	pseudogene	730993	RPS3AP39	NA	NA	4	3.304	0	NA	NA	NA	NA	No	NA	0.000196	rs116449999	38
ENSG00000182048	TRPC2	11	3631131	3658789	1	pseudogene	7221	TRPC2	NA	NA	0	0	8	2.79447e-05	0.0172236145920356	BIOS_eQTL_geneLevel	+	No	NA	2.267e-06	rs116449999	38
ENSG00000110713	NUP98	11	3692313	3819022	-1	protein_coding	4928	NUP98	0.999999978537761	-0.641304044	0	0	2	1.73978e-05	0.000541675	GTEx_v7_Thyroid	+	No	NA	8.26e-05	rs116449999	38
ENSG00000121335	PRB2	12	11544476	11653975	-1	protein_coding	653247	PRB2	2.87656217860537e-14	0.22843617	0	0	0	NA	NA	NA	NA	Yes	Mesendoderm	3.954e-06	rs11054696	39
ENSG00000256237	RP11-434C1.2	12	11694329	11708772	-1	lincRNA	NA	NA	NA	NA	0	0	0	NA	NA	NA	NA	Yes	GM12878:hESC:IMR90:Mesenchymal_Stem_Cell:Mesendoderm:Trophoblast-like_Cell	3.954e-06	rs11054696	39
ENSG00000251747	RNU7-60P	12	11699413	11699474	1	snRNA	100151655	RNU7-60P	NA	NA	0	0	0	NA	NA	NA	NA	Yes	GM12878:hESC:IMR90:Mesenchymal_Stem_Cell:Mesendoderm:Trophoblast-like_Cell	3.954e-06	rs11054696	39
ENSG00000139083	ETV6	12	11802788	12048336	1	protein_coding	2120	ETV6	0.99522782011263	1.935972876	0	0	0	NA	NA	NA	NA	Yes	hESC:IMR90:Left_Ventricle:Mesenchymal_Stem_Cell:Mesendoderm	3.954e-06	rs11054696	39
ENSG00000121380	BCL2L14	12	12202778	12364018	1	protein_coding	79370	BCL2L14	0.14312358632999	-0.122877895	2	16.57	0	NA	NA	NA	NA	No	NA	3.954e-06	rs11054696	39
ENSG00000198134	RP11-267J23.4	12	12264097	12264423	1	pseudogene	NA	NA	NA	NA	2	16.57	0	NA	NA	NA	NA	No	NA	3.954e-06	rs11054696	39
ENSG00000070018	LRP6	12	12268959	12419946	-1	protein_coding	4040	LRP6	0.999978329943341	0.505345693	2	16.57	2	-9	0.000929706	GTEx_v6_Muscle_Skeletal:GTEx_v7_Heart_Left_Ventricle:GTEx_v7_Muscle_Skeletal:CMC_SVA_cis	-	Yes	Mesenchymal_Stem_Cell	3.954e-06	rs11054696	39
ENSG00000242405	RP11-267J23.1	12	12308196	12308706	1	pseudogene	NA	NA	NA	NA	2	16.57	0	NA	NA	NA	NA	No	NA	3.954e-06	rs11054696	39
ENSG00000111261	MANSC1	12	12482198	12503475	-1	protein_coding	54682	MANSC1	0.000352735755361128	-0.129891379	0	0	0	NA	NA	NA	NA	Yes	hESC:IMR90:Left_Ventricle:Liver:Mesenchymal_Stem_Cell:Mesendoderm:Trophoblast-like_Cell	3.954e-06	rs11054696	39
ENSG00000243141	RP11-757G14.1	12	12491710	12492188	1	pseudogene	NA	NA	NA	NA	0	0	0	NA	NA	NA	NA	Yes	hESC:IMR90:Left_Ventricle:Liver:Mesenchymal_Stem_Cell:Mesendoderm:Trophoblast-like_Cell	3.954e-06	rs11054696	39
ENSG00000205791	LOH12CR2	12	12508342	12510001	-1	protein_coding	503693	LOH12CR2	NA	NA	0	0	0	NA	NA	NA	NA	Yes	hESC:IMR90:Left_Ventricle:Liver:Mesenchymal_Stem_Cell:Mesendoderm:Trophoblast-like_Cell	3.954e-06	rs11054696	39
ENSG00000165714	LOH12CR1	12	12510013	12619840	1	protein_coding	118426	LOH12CR1	0.021632084531083	1.386790687	0	0	0	NA	NA	NA	NA	Yes	hESC:IMR90:Left_Ventricle:Liver:Mesenchymal_Stem_Cell:Mesendoderm:Trophoblast-like_Cell	3.954e-06	rs11054696	39
ENSG00000111266	DUSP16	12	12628829	12715317	-1	protein_coding	80824	DUSP16	0.112697836437734	-0.455489112	0	0	0	NA	NA	NA	NA	Yes	IMR90:Mesenchymal_Stem_Cell:Mesendoderm	3.954e-06	rs11054696	39
ENSG00000183150	GPR19	12	12813825	12849141	-1	protein_coding	2842	GPR19	0.348589813892755	-0.214830791	0	0	0	NA	NA	NA	NA	Yes	hESC:IMR90:Mesenchymal_Stem_Cell:Mesendoderm	3.954e-06	rs11054696	39
ENSG00000111276	CDKN1B	12	12867992	12875305	1	protein_coding	1027	CDKN1B	0.847005306213341	-1.316978566	0	0	0	NA	NA	NA	NA	Yes	hESC:IMR90:Mesenchymal_Stem_Cell:Mesendoderm	3.954e-06	rs11054696	39
ENSG00000256658	RP11-180M15.4	12	12876231	12876945	-1	antisense	NA	NA	NA	NA	0	0	0	NA	NA	NA	NA	Yes	hESC:IMR90:Mesenchymal_Stem_Cell:Mesendoderm	3.954e-06	rs11054696	39
ENSG00000178878	APOLD1	12	12878851	12982909	1	protein_coding	81575	APOLD1	0.000507905443363466	0.920315234	0	0	0	NA	NA	NA	NA	Yes	hESC:IMR90:Mesenchymal_Stem_Cell:Mesendoderm	3.954e-06	rs11054696	39
ENSG00000171435	KSR2	12	117890817	118406788	-1	protein_coding	283455	KSR2	0.999946624685717	-0.119279219	2	7.144	0	NA	NA	NA	NA	No	NA	6.384e-07	rs75026504;rs79859444	40
ENSG00000225131	PSME2P2	13	49345264	49345965	1	pseudogene	338099	PSME2P2	NA	NA	0	0	3	1.0196e-05	0.024092	GTEx_v7_Colon_Transverse	-	No	NA	0.0165	rs57884356	41
ENSG00000102539	MLNR	13	49794474	49796513	1	protein_coding	2862	MLNR	0.0465876752547782	NA	0	0	0	NA	NA	NA	NA	Yes	GM12878:IMR90:Left_Ventricle:Mesenchymal_Stem_Cell:Mesendoderm:Trophoblast-like_Cell	1.349e-07	rs112017404;rs57884356:rs112017404:rs57884356	41
ENSG00000102543	CDADC1	13	49822047	49867618	1	protein_coding	81602	CDADC1	6.88626543443745e-08	-0.132254037	0	0	0	NA	NA	NA	NA	Yes	GM12878:hESC:IMR90:Left_Ventricle:Liver:Mesenchymal_Stem_Cell:Mesendoderm:Trophoblast-like_Cell	1.349e-07	rs112017404;rs57884356:rs57884356:rs112017404	41
ENSG00000102547	CAB39L	13	49882786	50018262	-1	protein_coding	81617	CAB39L	0.0164205539395948	-0.445706723	0	0	7	9.20839e-07	7.28765e-05	GTEx_v7_Thyroid	+	Yes	GM12878:hESC:Hippocampus:IMR90:Left_Ventricle:Liver:Mesenchymal_Stem_Cell:Mesendoderm:Spleen:Trophoblast-like_Cell	1.349e-07	rs57884356;rs112017404;rs57884356:rs57884356:rs112017404	41
ENSG00000136169	SETDB2	13	50018429	50069138	1	protein_coding	83852	SETDB2	0.0437301091973815	-0.400255383	2	2.978	0	NA	NA	NA	NA	Yes	GM12878:hESC:Hippocampus:IMR90:Left_Ventricle:Liver:Mesenchymal_Stem_Cell:Mesendoderm:Spleen:Trophoblast-like_Cell	1.349e-07	rs57884356;rs112017404;rs57884356:rs57884356:rs112017404	41
ENSG00000236577	SNRPGP14	13	50063106	50063500	1	pseudogene	100874434	SNRPGP14	NA	NA	2	2.978	0	NA	NA	NA	NA	No	NA	0.0315	rs57884356;rs112017404	41
ENSG00000136147	PHF11	13	50069746	50103123	1	protein_coding	51131	PHF11	1.76757700990619e-05	0.060996867	11	6.839	0	NA	NA	NA	NA	Yes	GM12878:hESC:IMR90:Mesenchymal_Stem_Cell:Mesendoderm	1.349e-07	rs57884356;rs112017404;rs57884356:rs112017404:rs57884356	41
ENSG00000136144	RCBTB1	13	50106082	50159719	-1	protein_coding	55213	RCBTB1	0.000217673997703456	1.648365808	16	11.82	4	2.09691e-06	3.50046e-16	GTEx_v7_Thyroid	+	Yes	GM12878:IMR90:Mesenchymal_Stem_Cell	1.349e-07	rs57884356;rs112017404;rs57884356:rs57884356:rs112017404	41
ENSG00000176882	RP11-432M24.4	13	50194450	50194784	1	pseudogene	NA	NA	NA	NA	6	11.82	0	NA	NA	NA	NA	Yes	GM12878:IMR90:Mesenchymal_Stem_Cell	1.349e-07	rs112017404;rs57884356;rs57884356:rs57884356	41
ENSG00000152213	ARL11	13	50202435	50208008	1	protein_coding	115761	ARL11	8.09182009706795e-06	-0.392815863	5	11.82	1	4.19425e-05	0.0042165	GTEx_v7_Skin_Sun_Exposed_Lower_leg	-	No	NA	1.349e-07	rs112017404;rs57884356	41
ENSG00000123179	EBPL	13	50234859	50265611	-1	protein_coding	84650	EBPL	0.0388533331243391	NA	1	5.079	0	NA	NA	NA	NA	Yes	IMR90	7.668e-06	rs186255622	41
ENSG00000203547	AL135901.1	13	50243040	50243254	1	pseudogene	NA	NA	NA	NA	1	5.079	0	NA	NA	NA	NA	No	NA	3.938e-05	rs186255622	41
ENSG00000102753	KPNA3	13	50273447	50367057	-1	protein_coding	3839	KPNA3	0.809823934177535	0.508248178	2	5.079	0	NA	NA	NA	NA	Yes	GM12878:hESC:IMR90:Liver:Mesenchymal_Stem_Cell:Mesendoderm:Spleen:Trophoblast-like_Cell	1.349e-07	rs186255622;rs112017404;rs57884356:rs112017404:rs186255622:rs57884356	41
ENSG00000123178	SPRYD7	13	50486842	50510626	-1	protein_coding	57213	SPRYD7	0.0911571663926814	-0.824825518	0	0	0	NA	NA	NA	NA	Yes	IMR90:Mesenchymal_Stem_Cell	1.349e-07	rs112017404;rs57884356:rs112017404:rs186255622	41
ENSG00000186047	DLEU7	13	51285144	51418075	-1	protein_coding	220107	DLEU7	0.0310204749254743	-0.270149518	0	0	0	NA	NA	NA	NA	Yes	Mesenchymal_Stem_Cell	7.668e-06	rs186255622	41
ENSG00000233672	RNASEH2B-AS1	13	51450822	51484848	-1	antisense	100874255	RNASEH2B-AS1	NA	NA	0	0	0	NA	NA	NA	NA	Yes	GM12878:IMR90:Left_Ventricle:Mesenchymal_Stem_Cell	7.668e-06	rs186255622	41
ENSG00000136104	RNASEH2B	13	51483814	51544592	1	protein_coding	79621	RNASEH2B	1.29919624387268e-09	-0.60050604	0	0	0	NA	NA	NA	NA	Yes	GM12878:IMR90:Left_Ventricle:Mesenchymal_Stem_Cell	7.668e-06	rs186255622	41
ENSG00000123201	GUCY1B2	13	51568647	51654998	-1	pseudogene	2974	GUCY1B2	NA	NA	0	0	0	NA	NA	NA	NA	Yes	Mesenchymal_Stem_Cell:Mesendoderm:Spleen	1.349e-07	rs112017404;rs57884356:rs57884356:rs186255622:rs112017404	41
ENSG00000150510	FAM124A	13	51796503	51858377	1	protein_coding	220108	FAM124A	5.43000288891245e-07	NA	0	0	0	NA	NA	NA	NA	Yes	Mesenchymal_Stem_Cell	7.668e-06	rs186255622	41
ENSG00000270400	RP11-464I4.1	13	83719675	83720038	1	pseudogene	NA	NA	NA	NA	43	11.29	0	NA	NA	NA	NA	No	NA	1.327e-06	rs2819241	42
ENSG00000178235	SLITRK1	13	84451344	84456528	-1	protein_coding	114798	SLITRK1	0.988430445876677	-0.809613024	0	0	52	1.85455e-11	7.25702e-12	GTEx_v6_Artery_Aorta:GTEx_v7_Artery_Aorta	-	No	NA	1.327e-06	rs2819241	42
ENSG00000258777	HIF1A-AS1	14	62147759	62162541	-1	lincRNA	100750246	HIF1A-AS1	NA	NA	0	0	0	NA	NA	NA	NA	Yes	hESC:IMR90:Mesenchymal_Stem_Cell	8.32e-06	rs2357001	43
ENSG00000100644	HIF1A	14	62162231	62214976	1	protein_coding	3091	HIF1A	0.980689532418508	-0.246157214	0	0	0	NA	NA	NA	NA	Yes	hESC:IMR90:Mesenchymal_Stem_Cell	8.32e-06	rs2357001	43
ENSG00000258667	HIF1A-AS2	14	62182276	62217815	-1	lincRNA	105370526	HIF1A-AS2	NA	NA	0	0	0	NA	NA	NA	NA	Yes	hESC:IMR90:Mesenchymal_Stem_Cell:Mesendoderm:Trophoblast-like_Cell	8.32e-06	rs2357001	43
ENSG00000023608	SNAPC1	14	62229075	62263146	1	protein_coding	6617	SNAPC1	3.82492140215155e-07	0.232677173	0	0	0	NA	NA	NA	NA	Yes	hESC:IMR90:Mesenchymal_Stem_Cell:Mesendoderm:Trophoblast-like_Cell	8.32e-06	rs2357001	43
ENSG00000258882	CTD-2277K2.1	14	62278692	62437037	1	lincRNA	NA	NA	NA	NA	0	0	0	NA	NA	NA	NA	Yes	IMR90:Mesendoderm	8.32e-06	rs2357001	43
ENSG00000258903	RP11-355I22.2	14	62570096	62583893	-1	lincRNA	NA	NA	NA	NA	0	0	0	NA	NA	NA	NA	Yes	Mesendoderm	8.32e-06	rs2357001	43
ENSG00000186369	LINC00643	14	62584197	62596352	1	lincRNA	646113	LINC00643	NA	NA	0	0	0	NA	NA	NA	NA	Yes	Mesendoderm	8.32e-06	rs2357001	43
ENSG00000154001	PPP2R5E	14	63838075	64010092	-1	protein_coding	5529	PPP2R5E	0.999433463999183	-0.858370071	0	0	0	NA	NA	NA	NA	Yes	GM12878:Mesenchymal_Stem_Cell:Mesendoderm:Trophoblast-like_Cell	8.32e-06	rs2357001	43
ENSG00000261242	CTD-2302E22.4	14	64010287	64011382	1	antisense	NA	NA	NA	NA	0	0	0	NA	NA	NA	NA	Yes	GM12878:Mesenchymal_Stem_Cell:Mesendoderm:Trophoblast-like_Cell	8.32e-06	rs2357001	43
ENSG00000200693	U3	14	64118015	64118217	-1	snoRNA	NA	NA	NA	NA	0	0	4	8.94797e-06	0.00837039	GTEx_v7_Esophagus_Mucosa	-	No	NA	5.686e-06	rs2357001	43
ENSG00000126821	SGPP1	14	64150932	64194757	-1	protein_coding	81537	SGPP1	0.500345892791711	-0.496333056	0	0	0	NA	NA	NA	NA	Yes	GM12878	8.32e-06	rs2357001	43
ENSG00000202182	Y_RNA	14	64314979	64315080	-1	misc_RNA	NA	NA	NA	NA	15	8.326	0	NA	NA	NA	NA	No	NA	7.007e-07	rs2357001	43
ENSG00000054654	SYNE2	14	64319683	64693165	1	protein_coding	23224	SYNE2	1.8533519422462e-11	0.553678875	15	8.326	15	-9	0	GTEx_v6_Brain_Cerebellar_Hemisphere:GTEx_v6_Brain_Cerebellum:GTEx_v6_Heart_Atrial_Appendage:GTEx_v6_Thyroid:GTEx_v7_Brain_Cerebellar_Hemisphere:GTEx_v7_Brain_Cerebellum:GTEx_v7_Heart_Atrial_Appendage:GTEx_v7_Heart_Left_Ventricle:GTEx_v7_Thyroid:BIOS_eQTL_geneLevel:CMC_SVA_cis	+	No	NA	7.007e-07	rs2357001	43
ENSG00000100714	MTHFD1	14	64854749	64926722	1	protein_coding	4522	MTHFD1	0.605609113854515	-0.471019379	0	0	0	NA	NA	NA	NA	Yes	IMR90:Mesenchymal_Stem_Cell:Mesendoderm	8.32e-06	rs2357001	43
ENSG00000089775	ZBTB25	14	64915824	64971931	-1	protein_coding	7597	ZBTB25	3.31068569517812e-05	NA	0	0	0	NA	NA	NA	NA	Yes	IMR90:Mesenchymal_Stem_Cell	8.32e-06	rs2357001	43
ENSG00000179841	AKAP5	14	64932217	64941221	1	protein_coding	9495	AKAP5	0.8411295400862	-0.454622228	0	0	0	NA	NA	NA	NA	Yes	IMR90:Mesenchymal_Stem_Cell	8.32e-06	rs2357001	43
ENSG00000126804	ZBTB1	14	64970430	65000408	1	protein_coding	22890	ZBTB1	0.973423963579882	-0.449443588	0	0	0	NA	NA	NA	NA	Yes	IMR90:Mesenchymal_Stem_Cell	8.32e-06	rs2357001	43
ENSG00000259116	RP11-973N13.4	14	64980872	65007086	-1	antisense	102723809	LOC102723809	NA	NA	0	0	0	NA	NA	NA	NA	Yes	Mesenchymal_Stem_Cell	8.32e-06	rs2357001	43
ENSG00000165807	PPP1R36	14	65016620	65056098	1	protein_coding	145376	PPP1R36	2.76562693347729e-07	-0.031002517	0	0	0	NA	NA	NA	NA	Yes	Mesenchymal_Stem_Cell	8.32e-06	rs2357001	43
ENSG00000259010	RP11-973N13.2	14	65066961	65068362	-1	pseudogene	NA	NA	NA	NA	0	0	0	NA	NA	NA	NA	Yes	Mesenchymal_Stem_Cell	8.32e-06	rs2357001	43
ENSG00000070182	SPTB	14	65213002	65346601	-1	protein_coding	6710	SPTB	0.999999747900015	0.434589294	0	0	0	NA	NA	NA	NA	Yes	Mesenchymal_Stem_Cell	8.32e-06	rs2357001	43
ENSG00000258289	CHURC1	14	65381079	65411309	1	protein_coding	91612	CHURC1	3.13272051464755e-05	1.47722281	0	0	0	NA	NA	NA	NA	Yes	Mesenchymal_Stem_Cell	8.32e-06	rs2357001	43
ENSG00000257365	FNTB	14	65381203	65529368	1	protein_coding	2342	FNTB	0.17200103905538	-0.965646144	0	0	0	NA	NA	NA	NA	Yes	Mesenchymal_Stem_Cell	8.32e-06	rs2357001	43
ENSG00000125954	CHURC1-FNTB	14	65381203	65528521	1	protein_coding	100529261	CHURC1-FNTB	NA	0.241891542	0	0	0	NA	NA	NA	NA	Yes	Mesenchymal_Stem_Cell	8.32e-06	rs2357001	43
ENSG00000139998	RAB15	14	65412532	65439494	-1	protein_coding	376267	RAB15	5.20750293834997e-06	-0.041374625	0	0	0	NA	NA	NA	NA	Yes	IMR90:Mesenchymal_Stem_Cell	8.32e-06	rs2357001	43
ENSG00000205562	RP11-497E19.1	14	85991477	85996332	-1	lincRNA	NA	NA	NA	NA	0	0	0	NA	NA	NA	NA	Yes	Mesendoderm	0.001337	rs11851487	44
ENSG00000258945	RP11-497E19.2	14	85994943	85995730	1	protein_coding	NA	NA	NA	NA	0	0	0	NA	NA	NA	NA	Yes	Mesendoderm	0.001337	rs11851487	44
ENSG00000185070	FLRT2	14	85996488	86095034	1	protein_coding	23768	FLRT2	0.894038333573428	-0.825060174	0	0	0	NA	NA	NA	NA	Yes	Mesendoderm	0.001337	rs11851487	44
ENSG00000258733	CTD-2341M24.1	14	86401054	86596117	1	lincRNA	NA	NA	NA	NA	0	0	0	NA	NA	NA	NA	Yes	Mesenchymal_Stem_Cell	0.001337	rs11851487	44
ENSG00000258807	RP11-1152H15.1	14	88176763	88338635	-1	lincRNA	NA	NA	NA	NA	43	19.31	0	NA	NA	NA	NA	No	NA	8.781e-06	rs11851487	44
ENSG00000259077	RP11-804L24.2	14	88277326	88304683	1	lincRNA	NA	NA	NA	NA	43	19.31	0	NA	NA	NA	NA	No	NA	8.781e-06	rs11851487	44
ENSG00000054983	GALC	14	88304164	88460009	-1	protein_coding	2581	GALC	6.28347214969704e-07	1.014021209	43	19.31	42	3.11584e-08	3.64423e-24	GTEx_v7_Muscle_Skeletal:GTEx_v7_Skin_Not_Sun_Exposed_Suprapubic:BIOS_eQTL_geneLevel	-	No	NA	8.781e-06	rs11851487	44
ENSG00000260411	RP11-420N3.2	16	5289803	6826015	1	processed_transcript	NA	NA	NA	NA	3	21.2	0	NA	NA	NA	NA	No	NA	6.677e-06	rs77506474	45
ENSG00000078328	RBFOX1	16	6069095	7763340	1	protein_coding	54715	RBFOX1	0.935961018293749	1.09605486	3	21.2	0	NA	NA	NA	NA	No	NA	6.677e-06	rs77506474	45
ENSG00000257180	RP11-509E10.1	16	6106976	6142955	1	sense_intronic	NA	NA	NA	NA	3	21.2	0	NA	NA	NA	NA	No	NA	6.677e-06	rs77506474	45
ENSG00000186153	WWOX	16	78133310	79246564	1	protein_coding	51741	WWOX	1.93855273615458e-08	2.205828093	1	5.684	0	NA	NA	NA	NA	No	NA	2.257e-06	rs74032742	46
ENSG00000266441	RP11-91I8.3	18	6728820	6729861	-1	antisense	NA	NA	NA	NA	0	0	0	NA	NA	NA	NA	Yes	Left_Ventricle	7.527e-07	rs11663276	47
ENSG00000088756	ARHGAP28	18	6729717	6915715	1	protein_coding	79822	ARHGAP28	0.0029584189440561	1.867894614	0	0	0	NA	NA	NA	NA	Yes	Left_Ventricle	7.527e-07	rs11663276	47
ENSG00000173482	PTPRM	18	7566780	8406859	1	protein_coding	5797	PTPRM	0.999958213992023	NA	0	0	0	NA	NA	NA	NA	Yes	IMR90	7.527e-07	rs11663276	47
ENSG00000206418	RAB12	18	8609443	8639379	1	protein_coding	201475	RAB12	0.718356946973086	NA	21	12.25	0	NA	NA	NA	NA	No	NA	7.527e-07	rs11663276	47
ENSG00000266708	RP11-661O13.1	18	8635177	8636345	-1	antisense	NA	NA	NA	NA	21	12.25	0	NA	NA	NA	NA	No	NA	7.527e-07	rs11663276	47
ENSG00000263935	RP11-674N23.2	18	8688020	8688408	-1	pseudogene	NA	NA	NA	NA	21	12.25	0	NA	NA	NA	NA	Yes	GM12878:hESC:IMR90:Mesenchymal_Stem_Cell:Mesendoderm	7.527e-07	rs11663276	47
ENSG00000265962	RP11-674N23.1	18	8695854	8707619	-1	antisense	100287082	GACAT2	NA	NA	15	12.25	0	NA	NA	NA	NA	Yes	GM12878:hESC:IMR90:Mesenchymal_Stem_Cell:Mesendoderm	7.527e-07	rs11663276	47
ENSG00000168502	SOGA2	18	8705659	8832776	1	protein_coding	23255	SOGA2	0.00589096940992293	0.568649466	1	4.471	0	NA	NA	NA	NA	Yes	GM12878:hESC:IMR90:Mesenchymal_Stem_Cell:Mesendoderm	7.527e-07	rs11663276	47
ENSG00000178127	NDUFV2	18	9102628	9134343	1	protein_coding	4729	NDUFV2	0.00763022340313864	-0.207601641	0	0	0	NA	NA	NA	NA	Yes	GM12878:hESC:IMR90:Mesenchymal_Stem_Cell:Mesendoderm	7.527e-07	rs11663276	47
ENSG00000265257	RP11-21J18.1	18	9102734	9254344	1	processed_transcript	NA	NA	NA	NA	0	0	0	NA	NA	NA	NA	Yes	GM12878:hESC:IMR90:Mesenchymal_Stem_Cell:Mesendoderm	7.527e-07	rs11663276	47
ENSG00000266053	RP11-143J12.2	18	9121263	9136643	-1	antisense	101927275	NDUFV2-AS1	NA	NA	0	0	0	NA	NA	NA	NA	Yes	hESC:IMR90:Mesenchymal_Stem_Cell:Mesendoderm	7.527e-07	rs11663276	47
ENSG00000101745	ANKRD12	18	9136226	9285983	1	protein_coding	23253	ANKRD12	0.999985243734791	-0.999584436	0	0	0	NA	NA	NA	NA	Yes	hESC:IMR90:Mesenchymal_Stem_Cell:Mesendoderm	7.527e-07	rs11663276	47
ENSG00000264964	RP11-888D10.3	18	9315192	9334439	-1	lincRNA	NA	NA	NA	NA	0	0	0	NA	NA	NA	NA	Yes	IMR90	7.527e-07	rs11663276	47
ENSG00000128791	TWSG1	18	9334765	9402418	1	protein_coding	57045	TWSG1	0.890252416255217	0.697265053	0	0	0	NA	NA	NA	NA	Yes	IMR90	7.527e-07	rs11663276	47
ENSG00000273335	RP11-61L19.2	18	9473419	9474004	-1	lincRNA	NA	NA	NA	NA	0	0	0	NA	NA	NA	NA	Yes	IMR90:Mesendoderm	7.527e-07	rs11663276	47
ENSG00000017797	RALBP1	18	9475007	9538114	1	protein_coding	10928	RALBP1	0.670181325366825	0.474346525	0	0	0	NA	NA	NA	NA	Yes	IMR90:Mesendoderm	7.527e-07	rs11663276	47
ENSG00000154845	PPP4R1	18	9546789	9615238	-1	protein_coding	9989	PPP4R1	0.998557751833321	-0.669629725	0	0	0	NA	NA	NA	NA	Yes	IMR90	7.527e-07	rs11663276	47
ENSG00000263627	RP11-692N5.1	18	9615262	9619361	1	lincRNA	101927323	PPP4R1-AS1	NA	NA	0	0	0	NA	NA	NA	NA	Yes	IMR90	7.527e-07	rs11663276	47
ENSG00000101654	RNMT	18	13726659	13764557	1	protein_coding	8731	RNMT	0.0809328060183284	-0.317191604	1	10.61	1	3.9802e-114	0	GTEx_v6_Testis:GTEx_v6_Whole_Blood:GTEx_v7_Testis:GTEx_v7_Whole_Blood:BIOS_eQTL_geneLevel	+	No	NA	5.359e-06	rs60637140	48
ENSG00000211528	AP001525.1	18	13823914	13823985	-1	miRNA	NA	NA	NA	NA	1	10.61	0	NA	NA	NA	NA	No	NA	5.359e-06	rs60637140	48
ENSG00000176136	MC5R	18	13824154	13826861	1	protein_coding	4161	MC5R	0.00108831422696949	0.941288887	1	10.61	0	NA	NA	NA	NA	No	NA	5.359e-06	rs60637140	48
ENSG00000267073	AC005256.1	19	1748055	1748744	1	lincRNA	NA	NA	NA	NA	1	1.919	0	NA	NA	NA	NA	No	NA	4.198e-06	rs67256262	49
ENSG00000205922	ONECUT3	19	1752372	1780987	1	protein_coding	390874	ONECUT3	NA	1.738999455	1	1.919	0	NA	NA	NA	NA	No	NA	4.198e-06	rs67256262	49
ENSG00000130270	ATP8B3	19	1782074	1812275	-1	protein_coding	148229	ATP8B3	9.18832885175999e-22	0.242627896	1	1.919	0	NA	NA	NA	NA	No	NA	4.198e-06	rs67256262	49
ENSG00000267007	CTB-31O20.3	19	1815248	1815872	1	antisense	NA	NA	NA	NA	1	1.919	0	NA	NA	NA	NA	No	NA	4.198e-06	rs67256262	49
ENSG00000079313	REXO1	19	1815248	1848452	-1	protein_coding	57455	REXO1	0.567927564385063	NA	1	1.919	0	NA	NA	NA	NA	No	NA	4.198e-06	rs67256262	49
ENSG00000223244	MIR1909	19	1816158	1816237	-1	miRNA	100302210	MIR1909	NA	NA	1	1.919	0	NA	NA	NA	NA	No	NA	4.198e-06	rs67256262	49
ENSG00000267244	CTB-31O20.4	19	1822088	1824544	1	processed_transcript	100288123	LOC100288123	NA	NA	1	1.919	0	NA	NA	NA	NA	No	NA	4.198e-06	rs67256262	49
ENSG00000204920	ZNF155	19	44472014	44502477	1	protein_coding	7711	ZNF155	1.33952561088838e-09	0.435175767	1	0.356	0	NA	NA	NA	NA	No	NA	9.406e-06	rs36010337	50
ENSG00000266921	RP11-15A1.7	19	44501048	44506988	-1	antisense	101928063	LOC101928063	NA	NA	1	0.356	0	NA	NA	NA	NA	No	NA	9.406e-06	rs36010337	50
ENSG00000159882	ZNF230	19	44507100	44518078	1	protein_coding	7773	ZNF230	0.00834108463646319	1.880496895	1	0.356	0	NA	NA	NA	NA	No	NA	9.406e-06	rs36010337	50
ENSG00000267144	AC067968.3	19	44527756	44529414	-1	lincRNA	NA	NA	NA	NA	1	0.356	0	NA	NA	NA	NA	No	NA	9.406e-06	rs36010337	50
ENSG00000159885	ZNF222	19	44529494	44537265	1	protein_coding	7673	ZNF222	9.20501288480146e-11	0.148041701	1	0.356	0	NA	NA	NA	NA	No	NA	9.406e-06	rs36010337	50
ENSG00000267022	ZNF223	19	44529506	44591471	1	protein_coding	7766	ZNF223	NA	0.204654881	1	0.356	0	NA	NA	NA	NA	No	NA	9.406e-06	rs36010337	50
ENSG00000178386	ZNF223	19	44555520	44572144	1	protein_coding	7766	ZNF223	5.14224553323192e-09	0.204654881	1	0.356	1	6.82022707727708e-08	0.00022267933	GTEx_v6_Adipose_Subcutaneous:GTEx_v6_Artery_Aorta:GTEx_v6_Esophagus_Mucosa:GTEx_v6_Lung:GTEx_v6_Nerve_Tibial:GTEx_v6_Skin_Sun_Exposed_Lower_leg:GTEx_v6_Thyroid	+	No	NA	9.406e-06	rs36010337	50
ENSG00000186026	ZNF284	19	44576297	44593766	1	protein_coding	342909	ZNF284	7.90018316515337e-09	0.721071866	1	0.356	0	NA	NA	NA	NA	No	NA	9.406e-06	rs36010337	50
ENSG00000101019	UQCC1	20	33890369	33999944	-1	protein_coding	55245	UQCC1	0.00485442531990324	-0.818063366	0	0	0	NA	NA	NA	NA	Yes	Left_Ventricle	6.962e-06	rs113096000	51
ENSG00000260032	LINC00657	20	34633544	34638882	-1	lincRNA	647979	LINC00657	NA	NA	0	0	0	NA	NA	NA	NA	Yes	Left_Ventricle	6.962e-06	rs113096000	51
ENSG00000088367	EPB41L1	20	34679426	34820721	1	protein_coding	2036	EPB41L1	0.645386132721516	-0.629643623	0	0	0	NA	NA	NA	NA	Yes	Mesenchymal_Stem_Cell	6.962e-06	rs113096000	51
ENSG00000232406	RP11-234K24.3	20	34736648	34743682	-1	antisense	NA	NA	NA	NA	0	0	0	NA	NA	NA	NA	Yes	GM12878:IMR90:Liver:Mesenchymal_Stem_Cell	6.962e-06	rs113096000	51
ENSG00000131043	AAR2	20	34824381	34858840	1	protein_coding	25980	AAR2	0.000262136180238876	-0.626447067	0	0	0	NA	NA	NA	NA	Yes	GM12878:IMR90:Mesenchymal_Stem_Cell	6.962e-06	rs113096000	51
ENSG00000232907	RP5-977B1.7	20	35136563	35201794	-1	antisense	101926987	DLGAP4-AS1	NA	NA	0	0	0	NA	NA	NA	NA	Yes	Aorta:GM12878:hESC:IMR90:Left_Ventricle:Liver:Mesenchymal_Stem_Cell:Mesendoderm:Spleen:Trophoblast-like_Cell	6.962e-06	rs113096000	51
ENSG00000101335	MYL9	20	35169887	35178228	1	protein_coding	10398	MYL9	0.0660421350679322	NA	0	0	0	NA	NA	NA	NA	Yes	IMR90:Mesenchymal_Stem_Cell	6.962e-06	rs113096000	51
ENSG00000259716	RP5-977B1.11	20	35177530	35232932	-1	antisense	NA	NA	NA	NA	0	0	0	NA	NA	NA	NA	Yes	Aorta:GM12878:hESC:IMR90:Left_Ventricle:Liver:Mesenchymal_Stem_Cell:Mesendoderm:Spleen:Trophoblast-like_Cell	6.962e-06	rs113096000	51
ENSG00000118707	TGIF2	20	35201891	35222353	1	protein_coding	60436	TGIF2	0.307264900831979	-0.215548649	0	0	0	NA	NA	NA	NA	Yes	Aorta:GM12878:hESC:IMR90:Left_Ventricle:Liver:Mesenchymal_Stem_Cell:Mesendoderm:Spleen:Trophoblast-like_Cell	6.962e-06	rs113096000	51
ENSG00000259399	TGIF2-C20orf24	20	35202956	35240787	1	protein_coding	100527943	TGIF2-C20orf24	0.932314274654765	NA	0	0	0	NA	NA	NA	NA	Yes	Aorta:GM12878:hESC:IMR90:Left_Ventricle:Liver:Mesenchymal_Stem_Cell:Mesendoderm:Spleen:Trophoblast-like_Cell	6.962e-06	rs113096000	51
ENSG00000101084	C20orf24	20	35234137	35240960	1	protein_coding	55969	C20orf24	0.856745481043852	NA	0	0	0	NA	NA	NA	NA	Yes	Aorta:GM12878:hESC:IMR90:Left_Ventricle:Liver:Mesenchymal_Stem_Cell:Mesendoderm:Spleen:Trophoblast-like_Cell	6.962e-06	rs113096000	51
ENSG00000101082	SLA2	20	35240721	35274619	-1	protein_coding	84174	SLA2	0.384130951390547	1.292260641	11	2.464	0	NA	NA	NA	NA	Yes	GM12878:hESC:IMR90:Left_Ventricle:Liver:Mesenchymal_Stem_Cell:Mesendoderm:Spleen:Trophoblast-like_Cell	1.115e-06	rs113096000	51
ENSG00000101079	NDRG3	20	35280169	35374481	-1	protein_coding	57446	NDRG3	0.919621043818656	-0.332649937	41	14.63	1	5.97539e-08	6.24026e-05	GTEx_v6_Adipose_Subcutaneous:GTEx_v6_Skin_Sun_Exposed_Lower_leg:GTEx_v7_Adipose_Subcutaneous:GTEx_v7_Adipose_Visceral_Omentum:GTEx_v7_Lung:GTEx_v7_Muscle_Skeletal:GTEx_v7_Skin_Sun_Exposed_Lower_leg:GTEx_v7_Thyroid:BIOS_eQTL_geneLevel	-	Yes	IMR90:Mesenchymal_Stem_Cell	1.115e-06	rs113096000	51
ENSG00000202255	Y_RNA	20	35296962	35297073	-1	misc_RNA	NA	NA	NA	NA	15	11.69	0	NA	NA	NA	NA	No	NA	1.115e-06	rs113096000	51
ENSG00000265441	AL132768.1	20	35374459	35374533	1	miRNA	NA	NA	NA	NA	30	14.63	0	NA	NA	NA	NA	Yes	IMR90:Mesenchymal_Stem_Cell	4.136e-06	rs113096000	51
ENSG00000149636	DSN1	20	35380194	35402221	-1	protein_coding	79980	DSN1	1.72357694081058e-06	-1.01169369	34	14.63	37	3.98614805084e-11	1.20402e-07	xQTLServer_eQTLs:GTEx_v6_Adipose_Subcutaneous:GTEx_v7_Adipose_Subcutaneous:GTEx_v7_Brain_Frontal_Cortex_BA9:GTEx_v7_Breast_Mammary_Tissue:GTEx_v7_Esophagus_Gastroesophageal_Junction:GTEx_v7_Esophagus_Mucosa:GTEx_v7_Esophagus_Muscularis:GTEx_v7_Muscle_Skeletal:GTEx_v7_Nerve_Tibial:GTEx_v7_Skin_Not_Sun_Exposed_Suprapubic:GTEx_v7_Skin_Sun_Exposed_Lower_leg	+	Yes	IMR90:Mesenchymal_Stem_Cell	1.115e-06	rs113096000	51
ENSG00000149639	SOGA1	20	35405845	35492089	-1	protein_coding	140710	SOGA1	0.997564311741111	-4.219755007	27	8.265	0	NA	NA	NA	NA	Yes	GM12878:IMR90:Left_Ventricle:Mesenchymal_Stem_Cell:Mesendoderm:Trophoblast-like_Cell	4.136e-06	rs113096000	51
ENSG00000101342	TLDC2	20	35504524	35522638	1	protein_coding	140711	TLDC2	0.113178686310675	-0.852968274	0	0	0	NA	NA	NA	NA	Yes	GM12878:IMR90:Left_Ventricle:Mesenchymal_Stem_Cell:Mesendoderm:Trophoblast-like_Cell	6.962e-06	rs113096000	51
ENSG00000124253	PCK1	20	56136136	56141513	1	protein_coding	5105	PCK1	3.93284883371259e-08	0.391382727	3	8.528	1	3.62033e-06	0.0114772	GTEx_v7_Artery_Tibial	-	No	NA	1.564e-06	rs6025645;rs6015037	52
ENSG00000227297	RP4-718J7.4	20	56174751	56176256	-1	lincRNA	NA	NA	NA	NA	3	8.528	0	NA	NA	NA	NA	No	NA	1.564e-06	rs6025645;rs6015037	52
ENSG00000124256	ZBP1	20	56178902	56195632	-1	protein_coding	81030	ZBP1	1.29679362994319e-10	0.164942575	3	8.528	0	NA	NA	NA	NA	No	NA	1.564e-06	rs6025645;rs6015037	52
ENSG00000124237	C20orf85	20	56725960	56736206	1	protein_coding	128602	C20orf85	1.38449977889469e-05	-0.140335438	0	0	0	NA	NA	NA	NA	Yes	hESC:IMR90:Mesenchymal_Stem_Cell:Mesendoderm	7.424e-06	rs6015037	52
ENSG00000124227	ANKRD60	20	56793551	56803709	-1	protein_coding	140731	ANKRD60	NA	NA	0	0	0	NA	NA	NA	NA	Yes	hESC:Mesendoderm	7.424e-06	rs6015037	52
ENSG00000124205	EDN3	20	57875482	57901047	1	protein_coding	1908	EDN3	0.0723949084714923	-1.111283725	0	0	0	NA	NA	NA	NA	Yes	IMR90	7.424e-06	rs6015037	52
ENSG00000235965	AP000431.1	21	20418629	20420003	-1	lincRNA	NA	NA	NA	NA	6	3.564	0	NA	NA	NA	NA	No	NA	2.281e-06	rs9982779	53
ENSG00000229289	AP000431.2	21	20502841	20506741	1	lincRNA	NA	NA	NA	NA	6	3.564	0	NA	NA	NA	NA	No	NA	2.281e-06	rs9982779	53
ENSG00000154654	NCAM2	21	22370633	22915650	1	protein_coding	4685	NCAM2	0.922157338297282	-0.72263248	3	4.082	0	NA	NA	NA	NA	No	NA	9.939e-06	rs9680265	54
ENSG00000226872	AC002472.11	22	21385646	21398258	1	antisense	NA	NA	NA	NA	1	6.844	0	NA	NA	NA	NA	No	NA	3.003e-06	rs111752108	55
ENSG00000206145	P2RX6P	22	21389532	21399306	-1	pseudogene	440799	P2RX6P	NA	NA	1	6.844	0	NA	NA	NA	NA	No	NA	3.003e-06	rs111752108	55
ENSG00000187905	AC002472.13	22	21400249	21418457	1	protein_coding	400891	LRRC74B	NA	NA	1	6.844	0	NA	NA	NA	NA	No	NA	3.003e-06	rs111752108	55
ENSG00000249680	TUBA3GP	22	21419749	21424386	1	pseudogene	645348	TUBA3GP	NA	NA	1	6.844	0	NA	NA	NA	NA	No	NA	3.003e-06	rs111752108	55
ENSG00000169668	BCRP2	22	21457305	21476574	1	pseudogene	400892	BCRP2	NA	NA	1	6.844	0	NA	NA	NA	NA	No	NA	3.003e-06	rs111752108	55
ENSG00000197210	KB-1592A4.15	22	21468896	21478740	-1	lincRNA	NA	NA	NA	NA	1	6.844	0	NA	NA	NA	NA	No	NA	3.003e-06	rs111752108	55
ENSG00000239511	POM121L7	22	21477050	21482352	-1	protein_coding	728418	POM121L7	NA	NA	1	6.844	0	NA	NA	NA	NA	No	NA	3.003e-06	rs111752108	55
ENSG00000227880	RP11-46E17.6	22	27853208	27856021	-1	lincRNA	NA	NA	NA	NA	1	0.739	0	NA	NA	NA	NA	No	NA	6.485e-06	rs13058149	56
ENSG00000219438	FAM19A5	22	48885272	49246724	1	protein_coding	25817	FAM19A5	0.310031381590844	0.172454885	1	0.861	0	NA	NA	NA	NA	No	NA	3.785e-06	rs73425956	57
ENSG00000219016	CTA-299D3.8	22	48934712	48943199	-1	protein_coding	NA	NA	NA	NA	1	0.861	0	NA	NA	NA	NA	No	NA	3.785e-06	rs73425956	57

## Sheet: SuppTable_3b_GenMapNav
Supplementary Table 3b. Genes implicated by positional, eQTL, or chromatin interaction mapping of SNPs associated with Gene-Smoking interaction for cIMT in Navrongo sample
Note: SNPs were identified by a genome-wide suggestive ( P<1e-5) association in a sample-size weighted meta-analysis, grouped into LD-independent genomic loci, and mapped to genes using positional mapping, eQTL mapping, and chromatin interaction strategies. Loci for genes mapped by two genomic risk loci are listed as locus1:locus2. Blue highlighted rows represent low confidence loci; see Suppleme…
GenomicLocus	Gene	Ensembl ID	Entrez ID	CHR	Start BP	End BP	pLI	posMap #SNPs	posMap Max CADD	eqtlMap #SNPs	eqtlMap minP	eqtlMap minQ	eqtlMap Tissues	eqtlMap Direction	ciMap	ciMap Tissues	minGwasP	IndSigSNPs
Ensembl ID	Gene	CHR	Start BP	End BP			Entrez ID		pLI		posMap #SNPs	posMap Max CADD	eqtlMap #SNPs	eqtlMap minP	eqtlMap minQ	eqtlMap Tissues	eqtlMap Direction	ciMap	ciMap Tissues	minGwasP	IndSigSNPs	GenomicLocus
ensg	symbol	chr	start	end	strand	type	entrezID	HUGO	pLI	ncRVIS	posMapSNPs	posMapMaxCADD	eqtlMapSNPs	eqtlMapminP	eqtlMapminQ	eqtlMapts	eqtlDirection	ciMap	ciMapts	minGwasP	IndSigSNPs	GenomicLocus
ENSG00000163554	SPTA1	1	158580496	158656488	-1	protein_coding	6708	SPTA1	5.85298929647153e-05	1.228724747	14	9.039	0	NA	NA	NA	NA	No	NA	9.186e-06	rs452108	2
ENSG00000231237	OR6K1P	1	158664329	158665299	-1	pseudogene	81449	OR6K1P	NA	NA	14	9.039	0	NA	NA	NA	NA	No	NA	9.186e-06	rs452108	2
ENSG00000196171	OR6K2	1	158669369	158670486	-1	protein_coding	81448	OR6K2	6.62918854479771e-05	-0.19922804	15	9.039	0	NA	NA	NA	NA	No	NA	3.169e-06	rs452108	2
ENSG00000203757	OR6K3	1	158686958	158687953	-1	protein_coding	391114	OR6K3	0.0069063678864482	-0.098187875	15	9.039	14	1.95383e-26	0	GTEx_v6_Lung:GTEx_v7_Lung:BIOS_eQTL_geneLevel	-	No	NA	3.169e-06	rs452108	2
ENSG00000180437	OR6K4P	1	158693903	158694902	-1	pseudogene	128370	OR6K4P	NA	NA	14	9.039	15	3.91615e-18	0	GTEx_v6_Lung:GTEx_v6_Whole_Blood:GTEx_v7_Lung:GTEx_v7_Whole_Blood:BIOS_eQTL_geneLevel	+	No	NA	3.169e-06	rs452108	2
ENSG00000226949	OR6K5P	1	158711936	158713205	-1	pseudogene	391115	OR6K5P	NA	NA	7	5.483	0	NA	NA	NA	NA	No	NA	3.169e-06	rs452108	2
ENSG00000180433	OR6K6	1	158724510	158725681	1	protein_coding	128371	OR6K6	0.0104831042185149	0.465186218	3	2.39	0	NA	NA	NA	NA	No	NA	3.169e-06	rs452108	2
ENSG00000197403	OR6N1	1	158735466	158736492	-1	protein_coding	128372	OR6N1	0.00123986038668199	0.056264814	2	2.39	1	9.20723e-06	0.00633761682242991	BIOS_eQTL_geneLevel	-	No	NA	3.169e-06	rs452108	2
ENSG00000188340	OR6N2	1	158746472	158747425	-1	protein_coding	81442	OR6N2	0.0234399156655135	0.34265408	1	2.337	1	4.41981e-08	4.54907312635051e-05	BIOS_eQTL_geneLevel	-	No	NA	3.169e-06	rs452108	2
ENSG00000229724	OR2AQ1P	1	158765804	158766003	1	pseudogene	81474	OR2AQ1P	NA	NA	1	2.337	0	NA	NA	NA	NA	No	NA	3.169e-06	rs452108	2
ENSG00000168288	MMADHC	2	150426148	150444330	-1	protein_coding	27249	MMADHC	0.02077684339759	0.02475206	2	2.775	0	NA	NA	NA	NA	No	NA	3.734e-06	rs78380843;rs77831436	3
ENSG00000164023	SGMS2	4	108745719	108836203	1	protein_coding	166929	SGMS2	0.0371284039640799	-1.667008026	1	2.286	0	NA	NA	NA	NA	No	NA	8.924e-06	rs59483727	4
ENSG00000109475	RPL34	4	109541722	109551568	1	protein_coding	6164	RPL34	0.891623097197441	0.068453712	0	0	1	7.71936516877961e-06	4.4266e-11	GTEx_v6_Artery_Tibial:GTEx_v7_Nerve_Tibial	+	No	NA	8.924e-06	rs59483727	4
ENSG00000113569	NUP155	5	37288239	37371283	-1	protein_coding	9631	NUP155	0.990594276419902	-1.104018957	0	0	0	NA	NA	NA	NA	Yes	Mesenchymal_Stem_Cell	0.002321	rs62352637	5
ENSG00000082068	WDR70	5	37379314	37753537	1	protein_coding	55100	WDR70	0.802235272890051	-0.502941182	0	0	0	NA	NA	NA	NA	Yes	Mesenchymal_Stem_Cell	0.002321	rs62352637	5
ENSG00000164318	EGFLAM	5	38258511	38465123	1	protein_coding	133584	EGFLAM	9.38438550961537e-10	0.343739734	0	0	0	NA	NA	NA	NA	Yes	hESC:Mesenchymal_Stem_Cell:Mesendoderm:Trophoblast-like_Cell	0.002321	rs62352637	5
ENSG00000244968	LIFR-AS1	5	38556888	38671318	1	antisense	100506495	LIFR-AS1	NA	NA	0	0	0	NA	NA	NA	NA	Yes	hESC:IMR90:Left_Ventricle:Mesenchymal_Stem_Cell:Mesendoderm:Trophoblast-like_Cell	0.002321	rs62352637	5
ENSG00000265304	MIR3650	5	38557604	38557663	-1	miRNA	100500824	MIR3650	NA	NA	0	0	0	NA	NA	NA	NA	Yes	hESC:IMR90:Left_Ventricle:Mesenchymal_Stem_Cell:Mesendoderm:Trophoblast-like_Cell	0.002321	rs62352637	5
ENSG00000249911	RP11-122C5.1	5	38710469	38720375	-1	lincRNA	NA	NA	NA	NA	0	0	3	2.18924e-05	9.24037e-14	GTEx_v7_Esophagus_Muscularis	+	No	NA	0.001176	rs62352637	5
ENSG00000249740	CTD-2127H9.1	5	38736157	38845931	-1	lincRNA	101926904	LINC01265	NA	NA	0	0	0	NA	NA	NA	NA	Yes	hESC:IMR90:Mesenchymal_Stem_Cell:Mesendoderm:Trophoblast-like_Cell	0.002321	rs62352637	5
ENSG00000145623	OSMR	5	38845960	38945698	1	protein_coding	9180	OSMR	3.10306262078619e-11	-0.176500312	6	6.669	2	4.02845e-08	4.55918390608081e-05	BIOS_eQTL_geneLevel	-	Yes	hESC:IMR90:Mesenchymal_Stem_Cell:Mesendoderm:Trophoblast-like_Cell	9.022e-06	rs62352637	5
ENSG00000164327	RICTOR	5	38938021	39074510	-1	protein_coding	253260	RICTOR	0.999999999869293	-0.167173978	6	6.669	3	1.51394e-16	0	GTEx_v7_Adipose_Subcutaneous:GTEx_v7_Nerve_Tibial:BIOS_eQTL_geneLevel	-	Yes	GM12878:hESC:IMR90:Liver:Mesenchymal_Stem_Cell:Mesendoderm	9.022e-06	rs62352637	5
ENSG00000082074	FYB	5	39105338	39274630	-1	protein_coding	2533	FYB	0.792005858585418	0.193923315	0	0	0	NA	NA	NA	NA	Yes	IMR90	0.002321	rs62352637	5
ENSG00000171522	PTGER4	5	40679600	40693837	1	protein_coding	5734	PTGER4	0.896912956538018	-1.342868943	0	0	0	NA	NA	NA	NA	Yes	IMR90	0.002321	rs62352637	5
ENSG00000113638	TTC33	5	40714577	40756077	-1	protein_coding	23548	TTC33	0.0226185448110003	-0.592575381	0	0	0	NA	NA	NA	NA	Yes	hESC:IMR90:Mesendoderm	0.002321	rs62352637	5
ENSG00000132356	PRKAA1	5	40759481	40798476	-1	protein_coding	5562	PRKAA1	0.0351010343853684	NA	0	0	0	NA	NA	NA	NA	Yes	hESC	0.002321	rs62352637	5
ENSG00000182836	PLCXD3	5	41307056	41510730	-1	protein_coding	345557	PLCXD3	0.0484887392356897	-0.319158709	0	0	0	NA	NA	NA	NA	Yes	Left_Ventricle	0.002321	rs62352637	5
ENSG00000164483	SAMD3	6	130465460	130686570	-1	protein_coding	154075	SAMD3	1.09707510090606e-06	0.088198284	0	0	4	2.89441e-20	0	BIOS_eQTL_geneLevel	+	No	NA	4.588e-06	rs6908852	6
ENSG00000164484	TMEM200A	6	130686879	130764208	1	protein_coding	114801	TMEM200A	0.835246151685534	-0.080679932	4	20.3	0	NA	NA	NA	NA	No	NA	4.588e-06	rs6908852	6
ENSG00000266556	AL137251.1	6	130755410	130755498	1	miRNA	NA	NA	NA	NA	4	20.3	0	NA	NA	NA	NA	No	NA	4.588e-06	rs6908852	6
ENSG00000217160	RP11-331O9.1	6	153986842	153987525	1	pseudogene	NA	NA	NA	NA	8	7.535	0	NA	NA	NA	NA	No	NA	1.923e-06	rs4869800	7
ENSG00000242246	RP11-331O9.2	6	153987601	153987801	1	pseudogene	NA	NA	NA	NA	8	7.535	0	NA	NA	NA	NA	No	NA	1.923e-06	rs4869800	7
ENSG00000218776	RP11-331O9.3	6	153987762	153988453	1	pseudogene	NA	NA	NA	NA	8	7.535	0	NA	NA	NA	NA	No	NA	1.923e-06	rs4869800	7
ENSG00000217044	RP11-331O9.4	6	153988453	153989241	1	pseudogene	NA	NA	NA	NA	8	7.535	0	NA	NA	NA	NA	No	NA	1.923e-06	rs4869800	7
ENSG00000220733	RP11-331O9.5	6	153989312	153989497	1	pseudogene	NA	NA	NA	NA	9	9.013	0	NA	NA	NA	NA	No	NA	1.923e-06	rs4869800	7
ENSG00000220514	RP11-331O9.6	6	153989724	153989993	1	pseudogene	NA	NA	NA	NA	9	9.013	0	NA	NA	NA	NA	No	NA	1.923e-06	rs4869800	7
ENSG00000216713	MTND4P13	6	153990014	153991036	1	pseudogene	100862853	MTND4P13	NA	NA	11	9.013	0	NA	NA	NA	NA	No	NA	1.923e-06	rs4869800	7
ENSG00000199246	RNU6-896P	6	154002582	154002688	1	snRNA	106481922	RNU6-896P	NA	NA	15	9.013	0	NA	NA	NA	NA	No	NA	1.923e-06	rs4869800	7
ENSG00000120438	TCP1	6	160199530	160210781	-1	protein_coding	6950	TCP1	0.989085751892209	0.157899873	0	0	0	NA	NA	NA	NA	Yes	Mesenchymal_Stem_Cell	0.02613	rs2849519	8
ENSG00000112110	MRPL18	6	160210844	160219468	1	protein_coding	29074	MRPL18	0.000794102804498299	1.581628342	0	0	0	NA	NA	NA	NA	Yes	Mesenchymal_Stem_Cell	0.02613	rs2849519	8
ENSG00000197081	IGF2R	6	160390131	160534539	1	protein_coding	3482	IGF2R	0.999999196216303	-0.312060143	0	0	0	NA	NA	NA	NA	Yes	Mesenchymal_Stem_Cell	0.02613	rs2849519	8
ENSG00000233342	RP11-235G24.3	6	161347401	161348194	1	lincRNA	NA	NA	NA	NA	0	0	0	NA	NA	NA	NA	Yes	IMR90:Mesenchymal_Stem_Cell	0.02613	rs2849519	8
ENSG00000231863	RP3-428L16.1	6	161352112	161390803	1	antisense	NA	NA	NA	NA	0	0	0	NA	NA	NA	NA	Yes	IMR90:Mesenchymal_Stem_Cell	0.02613	rs2849519	8
ENSG00000272841	RP3-428L16.2	6	161411350	161413374	-1	antisense	NA	NA	NA	NA	0	0	0	NA	NA	NA	NA	Yes	Mesenchymal_Stem_Cell	0.02613	rs2849519	8
ENSG00000085511	MAP3K4	6	161412759	161538417	1	protein_coding	4216	MAP3K4	0.999991910638856	NA	0	0	0	NA	NA	NA	NA	Yes	Mesenchymal_Stem_Cell	0.02613	rs2849519	8
ENSG00000026652	AGPAT4	6	161551011	161695093	-1	protein_coding	56895	AGPAT4	0.674499951839515	0.748253089	0	0	0	NA	NA	NA	NA	Yes	IMR90:Mesenchymal_Stem_Cell	0.02613	rs2849519	8
ENSG00000185345	PARK2	6	161768452	163148803	-1	protein_coding	5071	PARK2	0.0218088318211922	0.549835313	5	8.312	5	1.86880918367929e-07	0.0006946125	GTEx_v6_Testis:GTEx_v7_Testis	-	No	NA	6.23e-06	rs2849519	8
ENSG00000221021	AL035697.1	6	162036098	162036191	1	miRNA	NA	NA	NA	NA	0	0	0	NA	NA	NA	NA	Yes	Aorta:hESC:IMR90:Left_Ventricle:Mesenchymal_Stem_Cell:Mesendoderm	0.02613	rs2849519	8
ENSG00000112530	PACRG	6	163148164	163736524	1	protein_coding	135138	PACRG	0.000104676937493315	0.454746473	5	8.312	5	-9	1.02045e-32	GTEx_v6_Adipose_Subcutaneous:GTEx_v6_Artery_Aorta:GTEx_v6_Artery_Coronary:GTEx_v6_Artery_Tibial:GTEx_v6_Brain_Cerebellar_Hemisphere:GTEx_v6_Colon_Sigmoid:GTEx_v6_Esophagus_Muscularis:GTEx_v6_Heart_Atrial_Appendage:GTEx_v6_Nerve_Tibial:GTEx_v6_Thyroid:GTEx_v7_Adipose_Subcutaneous:GTEx_v7_Adipose_Visceral_Omentum:GTEx_v7_Artery_Aorta:GTEx_v7_Artery_Coronary:GTEx_v7_Artery_Tibial:GTEx_v7_Brain_Cereb…	+	No	NA	6.23e-06	rs2849519	8
ENSG00000270419	CAHM	6	163834097	163834992	-1	lincRNA	100526820	CAHM	NA	NA	0	0	0	NA	NA	NA	NA	Yes	hESC:Hippocampus:IMR90:Left_Ventricle:Mesenchymal_Stem_Cell:Mesendoderm:Neural_Progenitor_Cell:Trophoblast-like_Cell	0.02613	rs2849519	8
ENSG00000112531	QKI	6	163835032	163999628	1	protein_coding	9444	QKI	0.963163356453829	-0.183477081	0	0	0	NA	NA	NA	NA	Yes	hESC:Hippocampus:IMR90:Left_Ventricle:Mesenchymal_Stem_Cell:Mesendoderm:Neural_Progenitor_Cell:Trophoblast-like_Cell	0.02613	rs2849519	8
ENSG00000227455	RP11-300M24.1	6	165241239	165245119	1	lincRNA	NA	NA	NA	NA	0	0	0	NA	NA	NA	NA	Yes	hESC:IMR90:Left_Ventricle:Mesenchymal_Stem_Cell:Mesendoderm:Trophoblast-like_Cell	0.02613	rs2849519	8
ENSG00000112539	C6orf118	6	165693153	165723096	-1	protein_coding	168090	C6orf118	1.45572025749264e-17	0.46311863	0	0	0	NA	NA	NA	NA	Yes	Mesendoderm	0.02613	rs2849519	8
ENSG00000130226	DPP6	7	153584182	154685995	1	protein_coding	1804	DPP6	0.96769110706309	NA	8	4.698	0	NA	NA	NA	NA	No	NA	4.145e-06	rs79668927	9
ENSG00000188352	FOCAD	9	20658308	20995954	1	protein_coding	54914	FOCAD	5.37298120474939e-16	-0.251641786	5	8.169	0	NA	NA	NA	NA	No	NA	7.121e-06	rs116544389	11
ENSG00000188921	PTPLAD2	9	20995306	21031635	-1	protein_coding	401494	PTPLAD2	0.0044327552335192	0.614467458	0	0	3	6.60153e-08	3.67475e-40	GTEx_v7_Skin_Not_Sun_Exposed_Suprapubic:GTEx_v7_Skin_Sun_Exposed_Lower_leg:BIOS_eQTL_geneLevel	+	No	NA	7.033e-06	rs116544389;rs10964835	11
ENSG00000230208	IFNNP1	9	21058770	21059322	-1	pseudogene	654783	IFNNP1	NA	NA	4	2.026	0	NA	NA	NA	NA	No	NA	7.033e-06	rs10964835	11
ENSG00000171855	IFNB1	9	21077104	21077943	-1	protein_coding	3456	IFNB1	0.0136944375935193	-0.278476774	4	2.026	0	NA	NA	NA	NA	No	NA	7.033e-06	rs10964835	11
ENSG00000225027	IFNWP4	9	21106542	21106835	1	pseudogene	NA	IFNWP4	NA	NA	4	2.026	0	NA	NA	NA	NA	No	NA	7.033e-06	rs10964835	11
ENSG00000177047	IFNW1	9	21140631	21142144	-1	protein_coding	3467	IFNW1	0.00616591505034941	0.1851937	4	2.026	0	NA	NA	NA	NA	No	NA	7.033e-06	rs10964835	11
ENSG00000130707	ASS1	9	133320316	133376661	1	protein_coding	445	ASS1	0.000493337976371257	-0.363743931	1	3.511	0	NA	NA	NA	NA	No	NA	6.28e-06	rs11793060	12
ENSG00000107164	FUBP3	9	133454352	133513739	1	protein_coding	8939	FUBP3	0.86267942485269	-0.693417004	1	3.511	0	NA	NA	NA	NA	Yes	IMR90:Mesenchymal_Stem_Cell:Spleen	6.28e-06	rs11793060	12
ENSG00000015171	ZMYND11	10	180405	300577	1	protein_coding	10771	ZMYND11	0.999963586350186	-1.968147409	15	8.163	0	NA	NA	NA	NA	No	NA	1.047e-05	rs76252315	13
ENSG00000151240	DIP2C	10	320130	735683	-1	protein_coding	22982	DIP2C	0.999999838277401	-1.342826815	92	11	0	NA	NA	NA	NA	Yes	hESC:IMR90:Left_Ventricle:Mesenchymal_Stem_Cell:Mesendoderm:Spleen:Trophoblast-like_Cell	6.981e-06	rs76252315;rs74509340;rs76252315:rs74509340	13
ENSG00000264248	AL603831.1	10	323124	323248	1	miRNA	NA	NA	NA	NA	27	11	0	NA	NA	NA	NA	No	NA	6.981e-06	rs76252315	13
ENSG00000201861	RNA5SP298	10	327955	328065	-1	rRNA	106480761	RNA5SP298	NA	NA	28	11	0	NA	NA	NA	NA	No	NA	6.981e-06	rs76252315	13
ENSG00000239822	RN7SL754P	10	476181	476444	-1	misc_RNA	106479497	RN7SL754P	NA	NA	45	10.87	0	NA	NA	NA	NA	No	NA	9.788e-06	rs74509340	13
ENSG00000233021	RP11-490E15.2	10	483501	487110	1	antisense	NA	NA	NA	NA	51	10.87	0	NA	NA	NA	NA	No	NA	9.788e-06	rs74509340	13
ENSG00000225140	RP11-809C18.3	10	674578	677195	1	antisense	101930421	LOC101930421	NA	NA	0	0	0	NA	NA	NA	NA	Yes	hESC:IMR90:Left_Ventricle:Mesenchymal_Stem_Cell:Mesendoderm:Trophoblast-like_Cell	6.981e-06	rs76252315:rs74509340	13
ENSG00000107929	LARP4B	10	855484	977564	-1	protein_coding	23185	LARP4B	0.999885803939474	-0.657955891	0	0	0	NA	NA	NA	NA	Yes	IMR90:Mesenchymal_Stem_Cell	6.981e-06	rs76252315:rs74509340	13
ENSG00000205740	AL359878.1	10	1017097	1034281	-1	protein_coding	NA	NA	NA	NA	0	0	0	NA	NA	NA	NA	Yes	hESC:IMR90:Left_Ventricle:Mesenchymal_Stem_Cell:Mesendoderm:Trophoblast-like_Cell	6.981e-06	rs76252315:rs74509340	13
ENSG00000107937	GTPBP4	10	1034338	1065876	1	protein_coding	23560	GTPBP4	0.999865566823629	1.570225603	0	0	0	NA	NA	NA	NA	Yes	hESC:IMR90:Left_Ventricle:Mesenchymal_Stem_Cell:Mesendoderm:Trophoblast-like_Cell	6.981e-06	rs76252315:rs74509340	13
ENSG00000067064	IDI1	10	1085848	1095110	-1	protein_coding	3422	IDI1	0.00205000884385519	-0.346599362	0	0	0	NA	NA	NA	NA	Yes	IMR90:Mesenchymal_Stem_Cell	6.981e-06	rs76252315	13
ENSG00000047056	WDR37	10	1095478	1178237	1	protein_coding	22884	WDR37	0.996766802999974	-1.124929737	0	0	0	NA	NA	NA	NA	Yes	IMR90:Mesenchymal_Stem_Cell	6.981e-06	rs76252315	13
ENSG00000273001	RP11-118K6.3	10	3107616	3108193	-1	lincRNA	NA	NA	NA	NA	0	0	0	NA	NA	NA	NA	Yes	Trophoblast-like_Cell	NA	rs74509340	13
ENSG00000067057	PFKP	10	3108525	3179904	1	protein_coding	5214	PFKP	7.08342752970718e-15	NA	0	0	0	NA	NA	NA	NA	Yes	Trophoblast-like_Cell	NA	rs74509340	13
ENSG00000110321	EIF4G2	11	10818597	10830657	-1	protein_coding	1982	EIF4G2	NA	-1.088470568	0	0	0	NA	NA	NA	NA	Yes	hESC:IMR90:Mesenchymal_Stem_Cell:Mesendoderm:Trophoblast-like_Cell	9.095e-06	rs11043124	14
ENSG00000246308	RP11-685M7.3	11	10830844	10844478	1	antisense	101928053	LOC101928053	NA	NA	0	0	0	NA	NA	NA	NA	Yes	hESC:IMR90:Mesenchymal_Stem_Cell:Mesendoderm:Trophoblast-like_Cell	9.095e-06	rs11043124	14
ENSG00000236287	ZBED5	11	10833621	10880343	-1	protein_coding	58486	ZBED5	NA	NA	0	0	0	NA	NA	NA	NA	Yes	IMR90:Mesenchymal_Stem_Cell:Mesendoderm	9.095e-06	rs11043124	14
ENSG00000247271	ZBED5-AS1	11	10879806	10928349	1	antisense	729013	ZBED5-AS1	NA	NA	0	0	0	NA	NA	NA	NA	Yes	IMR90:Mesenchymal_Stem_Cell:Mesendoderm	9.095e-06	rs11043124	14
ENSG00000254401	RP11-179A10.1	11	11139401	11205158	1	lincRNA	NA	NA	NA	NA	16	14.79	0	NA	NA	NA	NA	No	NA	3.356e-06	rs11043124	14
ENSG00000254957	RP11-179A10.2	11	11157029	11159205	1	pseudogene	NA	NA	NA	NA	16	14.79	0	NA	NA	NA	NA	No	NA	3.356e-06	rs11043124	14
ENSG00000270897	RP11-179A10.3	11	11203654	11203960	-1	pseudogene	NA	NA	NA	NA	16	14.79	0	NA	NA	NA	NA	No	NA	3.356e-06	rs11043124	14
ENSG00000110328	GALNT18	11	11292423	11643552	-1	protein_coding	374378	GALNT18	0.0476851755722948	0.02731886	0	0	0	NA	NA	NA	NA	Yes	hESC:IMR90:Left_Ventricle:Mesenchymal_Stem_Cell:Mesendoderm:Neural_Progenitor_Cell:Trophoblast-like_Cell	9.095e-06	rs11043124	14
ENSG00000173456	RNF26	11	119205237	119208023	1	protein_coding	79102	RNF26	0.677950757165205	-0.332242776	2	7.39	0	NA	NA	NA	NA	No	NA	9.334e-06	rs891290	15
ENSG00000245385	RP11-334E6.10	11	119206959	119208019	-1	antisense	NA	NA	NA	NA	2	7.39	0	NA	NA	NA	NA	No	NA	9.334e-06	rs891290	15
ENSG00000223953	C1QTNF5	11	119209652	119217383	-1	protein_coding	114902	C1QTNF5	0.830646789327775	NA	2	7.39	0	NA	NA	NA	NA	No	NA	9.334e-06	rs891290	15
ENSG00000235718	MFRP	11	119209652	119217383	-1	protein_coding	83552	MFRP	5.34353005764772e-08	NA	2	7.39	0	NA	NA	NA	NA	No	NA	9.334e-06	rs891290	15
ENSG00000259159	MFRP	11	119209652	119217368	-1	protein_coding	83552	MFRP	NA	NA	2	7.39	0	NA	NA	NA	NA	No	NA	9.334e-06	rs891290	15
ENSG00000036672	USP2	11	119225925	119252436	-1	protein_coding	9099	USP2	0.185180861868735	-1.252220561	2	7.39	0	NA	NA	NA	NA	No	NA	9.334e-06	rs891290	15
ENSG00000254740	RP11-334E6.3	11	119243416	119252323	1	antisense	NA	NA	NA	NA	2	7.39	0	NA	NA	NA	NA	No	NA	9.334e-06	rs891290	15
ENSG00000245248	USP2-AS1	11	119252488	119397374	1	antisense	100499227	USP2-AS1	NA	NA	2	7.39	0	NA	NA	NA	NA	No	NA	9.334e-06	rs891290	15
ENSG00000254590	RP11-334E6.2	11	119273502	119274798	1	pseudogene	NA	NA	NA	NA	2	7.39	0	NA	NA	NA	NA	No	NA	9.334e-06	rs891290	15
ENSG00000254892	RP11-334E6.4	11	119274673	119274937	-1	pseudogene	NA	NA	NA	NA	2	7.39	0	NA	NA	NA	NA	No	NA	9.334e-06	rs891290	15
ENSG00000154096	THY1	11	119288090	119295695	-1	protein_coding	7070	THY1	0.164135342066625	0.593219922	2	7.39	0	NA	NA	NA	NA	No	NA	9.334e-06	rs891290	15
ENSG00000263873	RP11-334E6.12	11	119288661	119289824	1	sense_intronic	NA	NA	NA	NA	2	7.39	0	NA	NA	NA	NA	No	NA	9.334e-06	rs891290	15
ENSG00000182667	NTM	11	131240373	132206716	1	protein_coding	50863	NTM	0.525365693930018	-0.215951005	1	2.726	0	NA	NA	NA	NA	No	NA	6.243e-06	rs12797802	16
ENSG00000175215	CTDSP2	12	58213710	58240522	-1	protein_coding	10106	CTDSP2	0.397665011331897	-1.970628014	0	0	0	NA	NA	NA	NA	Yes	IMR90	7.421e-06	rs7358623	17
ENSG00000245651	RP11-620J15.2	12	58263618	58290265	-1	lincRNA	283387	LOC283387	NA	NA	0	0	0	NA	NA	NA	NA	Yes	IMR90	7.421e-06	rs7358623	17
ENSG00000258231	RP11-362K2.2	12	58937907	59206842	1	protein_coding	100506869	LOC100506869	NA	NA	1	9.591	0	NA	NA	NA	NA	No	NA	7.421e-06	rs7358623	17
ENSG00000257259	RP11-767I20.1	12	58959743	59175529	-1	lincRNA	101927653	LINC02388	NA	NA	1	9.591	0	NA	NA	NA	NA	Yes	hESC:IMR90:Liver:Mesenchymal_Stem_Cell:Mesendoderm	7.421e-06	rs7358623	17
ENSG00000139263	LRIG3	12	59265931	59314303	-1	protein_coding	121227	LRIG3	0.426287752609207	-0.133399408	0	0	0	NA	NA	NA	NA	Yes	IMR90:Mesenchymal_Stem_Cell	7.421e-06	rs7358623	17
ENSG00000257443	RP11-150C16.1	12	59314420	59458019	1	antisense	NA	NA	NA	NA	0	0	0	NA	NA	NA	NA	Yes	IMR90:Mesenchymal_Stem_Cell	7.421e-06	rs7358623	17
ENSG00000255830	RP11-385N17.3	12	114986659	114987657	1	pseudogene	NA	NA	NA	NA	1	5.629	0	NA	NA	NA	NA	No	NA	4.638e-06	rs11067175	18
ENSG00000265632	AC069240.1	12	114988567	114988654	-1	miRNA	NA	NA	NA	NA	1	5.629	0	NA	NA	NA	NA	No	NA	4.638e-06	rs11067175	18
ENSG00000258244	OSTF1P1	12	115025999	115026607	1	pseudogene	386654	OSTF1P1	NA	NA	1	5.629	0	NA	NA	NA	NA	No	NA	4.638e-06	rs11067175	18
ENSG00000258254	RP11-162N7.1	12	115059566	115060727	1	lincRNA	NA	NA	NA	NA	1	5.629	0	NA	NA	NA	NA	No	NA	4.638e-06	rs11067175	18
ENSG00000139915	MDGA2	14	47308826	48144157	-1	protein_coding	161357	MDGA2	0.993216871367626	0.397758699	2	0	0	NA	NA	NA	NA	No	NA	7.385e-06	rs201818410	19
ENSG00000272781	MDGA2	14	47311134	48143999	-1	protein_coding	161357	MDGA2	NA	0.397758699	2	0	0	NA	NA	NA	NA	No	NA	7.385e-06	rs201818410	19
ENSG00000072121	ZFYVE26	14	68194091	68283307	-1	protein_coding	23503	ZFYVE26	1.03844572602961e-11	-0.270914892	0	0	0	NA	NA	NA	NA	Yes	hESC:Mesendoderm	3.765e-06	rs11158732	20
ENSG00000182185	RAD51B	14	68286496	69196935	1	protein_coding	5890	RAD51B	1.45736567534375e-09	0.621695073	1	1.71	0	NA	NA	NA	NA	Yes	hESC:Mesendoderm	3.765e-06	rs11158732	20
ENSG00000240210	RP11-204K16.1	14	68805445	68806258	-1	pseudogene	NA	NA	NA	NA	1	1.71	0	NA	NA	NA	NA	No	NA	3.765e-06	rs11158732	20
ENSG00000259038	CTD-2325P2.4	14	69093883	69095162	-1	antisense	NA	NA	NA	NA	0	0	0	NA	NA	NA	NA	Yes	Aorta:GM12878:hESC:IMR90:Left_Ventricle:Liver:Mesenchymal_Stem_Cell:Mesendoderm:Neural_Progenitor_Cell:Right_Ventricle:Trophoblast-like_Cell	3.765e-06	rs11158732	20
ENSG00000185650	ZFP36L1	14	69254377	69263190	-1	protein_coding	677	ZFP36L1	0.506697565301335	-1.240479324	0	0	0	NA	NA	NA	NA	Yes	Aorta:GM12878:hESC:Hippocampus:IMR90:Left_Ventricle:Liver:Lung:Mesenchymal_Stem_Cell:Mesendoderm:Neural_Progenitor_Cell:Spleen:Trophoblast-like_Cell	3.765e-06	rs11158732	20
ENSG00000247092	SNHG10	14	95998634	96001209	-1	antisense	283596	SNHG10	NA	NA	0	0	0	NA	NA	NA	NA	Yes	Mesenchymal_Stem_Cell	1.64e-05	rs10873486	21
ENSG00000252481	SCARNA13	14	95999692	95999966	-1	snoRNA	677768	SCARNA13	NA	NA	0	0	0	NA	NA	NA	NA	Yes	Mesenchymal_Stem_Cell	1.64e-05	rs10873486	21
ENSG00000182512	GLRX5	14	95999840	96011061	1	protein_coding	51218	GLRX5	0.626214086667008	0.307302309	0	0	0	NA	NA	NA	NA	Yes	Mesenchymal_Stem_Cell	1.64e-05	rs10873486	21
ENSG00000258702	RP11-433J8.1	14	97059070	97062099	1	lincRNA	NA	NA	NA	NA	0	0	0	NA	NA	NA	NA	Yes	IMR90:Mesenchymal_Stem_Cell	1.64e-05	rs10873486	21
ENSG00000100749	VRK1	14	97263641	97398059	1	protein_coding	7443	VRK1	0.0428984052164855	-0.524567852	0	0	0	NA	NA	NA	NA	Yes	Mesenchymal_Stem_Cell	1.64e-05	rs10873486	21
ENSG00000246084	CTD-2506J14.1	14	97925153	98047938	1	lincRNA	101929241	LINC02325	NA	NA	0	0	0	NA	NA	NA	NA	Yes	hESC:Mesendoderm	1.64e-05	rs10873486	21
ENSG00000258869	RP11-204N11.1	14	98215601	98230326	-1	protein_coding	100132612	LINC02312	NA	NA	19	4.064	0	NA	NA	NA	NA	Yes	hESC:Mesendoderm	9.9e-06	rs10873486	21
ENSG00000258379	RP11-204N11.2	14	98252902	98255593	-1	lincRNA	NA	NA	NA	NA	19	4.064	0	NA	NA	NA	NA	No	NA	9.9e-06	rs10873486	21
ENSG00000246223	C14orf64	14	98391947	98444461	-1	protein_coding	388011	C14orf64	NA	NA	0	0	0	NA	NA	NA	NA	Yes	hESC:Left_Ventricle:Mesendoderm	1.64e-05	rs10873486	21
ENSG00000216173	AL132819.1	14	99828628	99828716	1	miRNA	NA	NA	NA	NA	0	0	0	NA	NA	NA	NA	Yes	IMR90	1.64e-05	rs10873486	21
ENSG00000183576	SETD3	14	99864083	99947216	-1	protein_coding	84193	SETD3	0.371891002606027	-0.140743383	0	0	0	NA	NA	NA	NA	Yes	Mesendoderm	1.64e-05	rs10873486	21
ENSG00000090061	CCNK	14	99947506	100001381	1	protein_coding	8812	CCNK	0.997144332155116	-1.248265489	0	0	0	NA	NA	NA	NA	Yes	Mesendoderm	1.64e-05	rs10873486	21
ENSG00000173786	CNP	17	40118759	40129749	1	protein_coding	1267	CNP	0.890888252106868	0.169424296	0	0	0	NA	NA	NA	NA	Yes	IMR90:Left_Ventricle:Liver:Mesenchymal_Stem_Cell	1.569e-05	rs116720528	22
ENSG00000089558	KCNH4	17	40308909	40333296	-1	protein_coding	23415	KCNH4	0.999978751386027	-0.452983046	0	0	0	NA	NA	NA	NA	Yes	GM12878:IMR90:Left_Ventricle:Liver:Mesenchymal_Stem_Cell	1.569e-05	rs116720528	22
ENSG00000161610	HCRT	17	40336078	40337470	-1	protein_coding	3060	HCRT	0.502440434384708	-0.292071092	0	0	0	NA	NA	NA	NA	Yes	GM12878:IMR90:Left_Ventricle:Liver:Mesenchymal_Stem_Cell	1.569e-05	rs116720528	22
ENSG00000167925	GHDC	17	40340817	40346531	-1	protein_coding	84514	GHDC	2.1212473947494e-05	-0.790742885	0	0	0	NA	NA	NA	NA	Yes	GM12878:IMR90:Left_Ventricle:Liver:Mesenchymal_Stem_Cell	1.569e-05	rs116720528	22
ENSG00000173757	STAT5B	17	40351186	40428725	-1	protein_coding	6777	STAT5B	0.999953160240961	-0.776025941	0	0	0	NA	NA	NA	NA	Yes	GM12878	1.569e-05	rs116720528	22
ENSG00000236194	AC003104.1	17	40422535	40424701	-1	sense_intronic	NA	NA	NA	NA	0	0	0	NA	NA	NA	NA	Yes	GM12878	1.569e-05	rs116720528	22
ENSG00000126561	STAT5A	17	40439565	40463961	1	protein_coding	6776	STAT5A	0.999866029464463	-0.75901606	2	3.089	0	NA	NA	NA	NA	Yes	GM12878:IMR90:Mesenchymal_Stem_Cell:Spleen	4.244e-06	rs116720528	22
ENSG00000168610	STAT3	17	40465342	40540586	-1	protein_coding	6774	STAT3	0.999989193151158	-0.485532674	5	17.44	0	NA	NA	NA	NA	No	NA	4.244e-06	rs116720528	22
ENSG00000221020	AC107993.1	17	40551027	40551109	1	miRNA	NA	NA	NA	NA	5	17.44	0	NA	NA	NA	NA	No	NA	4.244e-06	rs116720528	22
ENSG00000177469	PTRF	17	40554470	40575535	-1	protein_coding	284119	PTRF	0.0208810466767636	1.331642306	6	17.44	0	NA	NA	NA	NA	No	NA	4.244e-06	rs116720528	22
ENSG00000238704	RNU7-97P	17	40592216	40592277	-1	snRNA	106479063	RNU7-97P	NA	NA	4	17.44	0	NA	NA	NA	NA	No	NA	1.131e-05	rs116720528	22
ENSG00000033627	ATP6V0A1	17	40610862	40674629	1	protein_coding	535	ATP6V0A1	0.997249734540438	-0.758472109	3	3.197	0	NA	NA	NA	NA	No	NA	1.131e-05	rs116720528	22
ENSG00000264314	MIR548AT	17	40646791	40646848	1	miRNA	100847030	MIR548AT	NA	NA	1	2.465	0	NA	NA	NA	NA	No	NA	1.131e-05	rs116720528	22
ENSG00000267222	RP11-194N12.2	17	40647885	40648568	1	sense_intronic	NA	NA	NA	NA	1	2.465	0	NA	NA	NA	NA	No	NA	1.131e-05	rs116720528	22
ENSG00000267632	RP11-400F19.18	17	40661802	40663537	1	sense_intronic	NA	NA	NA	NA	1	2.465	0	NA	NA	NA	NA	Yes	IMR90:Left_Ventricle:Mesenchymal_Stem_Cell:Mesendoderm:Spleen	1.131e-05	rs116720528	22
ENSG00000265611	MIR5010	17	40666206	40666325	1	miRNA	100847046	MIR5010	NA	NA	1	2.465	0	NA	NA	NA	NA	No	NA	1.131e-05	rs116720528	22
ENSG00000131462	TUBG1	17	40761694	40767252	1	protein_coding	7283	TUBG1	0.975922883842582	-0.356638886	1	0.188	0	NA	NA	NA	NA	No	NA	5.677e-06	rs116720528	22
ENSG00000267189	ATP5LP7	17	40799852	40800161	1	pseudogene	100287964	ATP5LP7	NA	NA	1	0.188	0	NA	NA	NA	NA	No	NA	5.677e-06	rs116720528	22
ENSG00000267132	HMGB3P27	17	40800196	40800756	1	pseudogene	441795	HMGB3P27	NA	NA	1	0.188	0	NA	NA	NA	NA	No	NA	5.677e-06	rs116720528	22
ENSG00000037042	TUBG2	17	40811323	40819024	1	protein_coding	27175	TUBG2	0.00431001948765521	-0.743554285	1	0.188	0	NA	NA	NA	NA	No	NA	5.677e-06	rs116720528	22
ENSG00000068137	PLEKHH3	17	40819932	40829048	-1	protein_coding	79990	PLEKHH3	0.00376066186801617	NA	1	0.188	0	NA	NA	NA	NA	No	NA	5.677e-06	rs116720528	22
ENSG00000184451	CCR10	17	40830907	40835935	-1	protein_coding	2826	CCR10	0.00620605308801029	NA	1	0.188	0	NA	NA	NA	NA	No	NA	5.677e-06	rs116720528	22
ENSG00000267042	CTD-3193K9.4	17	40831981	40834038	1	antisense	NA	NA	NA	NA	1	0.188	0	NA	NA	NA	NA	No	NA	5.677e-06	rs116720528	22
ENSG00000108797	CNTNAP1	17	40834631	40851832	1	protein_coding	8506	CNTNAP1	0.0041087576230276	-0.621512703	1	0.188	0	NA	NA	NA	NA	No	NA	5.677e-06	rs116720528	22
ENSG00000267765	CTD-3193K9.3	17	40835205	40851484	-1	antisense	NA	NA	NA	NA	1	0.188	0	NA	NA	NA	NA	No	NA	5.677e-06	rs116720528	22
ENSG00000108799	EZH1	17	40852293	40897071	-1	protein_coding	2145	EZH1	0.000641437785994428	-0.562770669	1	0.188	0	NA	NA	NA	NA	No	NA	5.677e-06	rs116720528	22
ENSG00000131471	AOC3	17	41003201	41010147	1	protein_coding	8639	AOC3	6.4699578127283e-09	-0.500553811	1	2.516	0	NA	NA	NA	NA	No	NA	1.373e-05	rs7225801	22
ENSG00000260105	AOC4P	17	41017939	41026386	1	pseudogene	90586	AOC4P	NA	NA	3	10.79	2	1.24959e-06	0.000842726	GTEx_v7_Esophagus_Mucosa	-	No	NA	6.617e-06	rs7225801	22
ENSG00000213373	LINC00671	17	41026687	41050751	-1	lincRNA	388387	LINC00671	NA	NA	3	10.79	0	NA	NA	NA	NA	No	NA	6.617e-06	rs7225801	22
ENSG00000252039	RNU6-287P	17	41043355	41043452	-1	snRNA	106481269	RNU6-287P	NA	NA	3	10.79	0	NA	NA	NA	NA	No	NA	6.617e-06	rs7225801	22
ENSG00000131482	G6PC	17	41052814	41065386	1	protein_coding	2538	G6PC	0.00181135620983483	-0.028982885	3	10.79	0	NA	NA	NA	NA	No	NA	6.617e-06	rs7225801	22
ENSG00000200510	RNY4P2	17	41084865	41084959	-1	misc_RNA	6088	RNY4P2	NA	NA	3	10.79	0	NA	NA	NA	NA	No	NA	6.617e-06	rs7225801	22
ENSG00000212149	SNORA40	17	41092592	41092719	-1	snoRNA	677822	SNORA40	NA	NA	3	10.79	0	NA	NA	NA	NA	No	NA	6.617e-06	rs7225801	22
ENSG00000108825	PTGES3L-AARSD1	17	41102543	41132545	-1	protein_coding	100885850	PTGES3L-AARSD1	2.56865193172703e-08	NA	3	10.79	0	NA	NA	NA	NA	No	NA	6.617e-06	rs7225801	22
ENSG00000266967	AARSD1	17	41102543	41116515	-1	protein_coding	80755	AARSD1	2.43909906368394e-07	0.10568296	3	10.79	0	NA	NA	NA	NA	No	NA	6.617e-06	rs7225801	22
ENSG00000267060	PTGES3L	17	41120105	41132545	-1	protein_coding	100885848	PTGES3L	0.0247440738776789	-0.422602439	1	10.79	0	NA	NA	NA	NA	No	NA	NA	rs7225801	22
ENSG00000108830	RND2	17	41177258	41184057	1	protein_coding	8153	RND2	0.000138854210054274	NA	0	0	1	0.000111332	4.75531e-26	GTEx_v7_Skin_Sun_Exposed_Lower_leg	+	No	NA	6.617e-06	rs7225801	22
ENSG00000252100	AC002539.2	17	67945002	67945088	-1	miRNA	NA	NA	NA	NA	4	3.464	0	NA	NA	NA	NA	No	NA	2.059e-06	rs74656678	23
ENSG00000237560	AC004562.1	17	67957848	67979679	1	lincRNA	102723487	LINC01497	NA	NA	7	3.464	0	NA	NA	NA	NA	No	NA	2.059e-06	rs74656678	23
ENSG00000199801	Y_RNA	17	67982127	67982235	1	misc_RNA	NA	NA	NA	NA	7	3.464	0	NA	NA	NA	NA	No	NA	2.059e-06	rs74656678	23
ENSG00000230258	AC002539.1	17	68013465	68125000	-1	antisense	NA	NA	NA	NA	7	3.464	0	NA	NA	NA	NA	No	NA	2.059e-06	rs74656678	23
ENSG00000267603	LINC01028	17	68047418	68064236	1	lincRNA	101928141	LINC01028	NA	NA	3	2.196	0	NA	NA	NA	NA	No	NA	9.188e-06	rs74656678	23
ENSG00000153822	KCNJ16	17	68049570	68131749	1	protein_coding	3773	KCNJ16	5.41974671317498e-06	0.221443806	2	2.196	0	NA	NA	NA	NA	No	NA	9.188e-06	rs74656678	23
ENSG00000141965	FEM1A	19	4791728	4795571	1	protein_coding	55527	FEM1A	NA	-1.050656847	1	0.187	0	NA	NA	NA	NA	No	NA	7.041e-06	rs7245961	24
ENSG00000269604	AC005523.2	19	4791757	4795571	-1	antisense	NA	NA	NA	NA	1	0.187	0	NA	NA	NA	NA	No	NA	7.041e-06	rs7245961	24
ENSG00000127666	TICAM1	19	4815944	4831716	-1	protein_coding	148022	TICAM1	0.852477311306477	0.199243936	1	0.187	0	NA	NA	NA	NA	No	NA	7.041e-06	rs7245961	24
ENSG00000267484	CTC-518P12.6	19	4838344	4838919	1	antisense	NA	NA	NA	NA	1	0.187	0	NA	NA	NA	NA	No	NA	7.041e-06	rs7245961	24
ENSG00000105355	PLIN3	19	4838353	4867780	-1	protein_coding	10226	PLIN3	1.2373923055107e-08	-0.070740178	1	0.187	0	NA	NA	NA	NA	No	NA	7.041e-06	rs7245961	24
ENSG00000264899	AC027319.2	19	4876724	4876810	1	miRNA	NA	NA	NA	NA	1	0.187	0	NA	NA	NA	NA	No	NA	7.041e-06	rs7245961	24
ENSG00000221535	AC027319.1	19	4889215	4889310	-1	miRNA	NA	NA	NA	NA	1	0.187	0	NA	NA	NA	NA	No	NA	7.041e-06	rs7245961	24
ENSG00000205784	ARRDC5	19	4890449	4902879	-1	protein_coding	645432	ARRDC5	1.97507105170421e-06	0.058702643	1	0.187	0	NA	NA	NA	NA	No	NA	7.041e-06	rs7245961	24
ENSG00000221007	AL354984.1	20	56493940	56494091	1	miRNA	NA	NA	NA	NA	3	3.97	0	NA	NA	NA	NA	No	NA	2.938e-06	rs16981530	25
ENSG00000203971	RP13-379L11.2	20	56532182	56534716	-1	lincRNA	NA	NA	NA	NA	3	3.97	0	NA	NA	NA	NA	No	NA	2.938e-06	rs16981530	25
ENSG00000221451	AL354984.3	20	56551074	56551149	1	miRNA	NA	NA	NA	NA	3	3.97	0	NA	NA	NA	NA	No	NA	2.938e-06	rs16981530	25

## Sheet: SuppTable_3c_GenMapAll
Supplementary Table 3c. Genes implicated by positional, eQTL, or chromatin interaction mapping of SNPs associated with Gene-Smoking interaction for cIMT in combined sample
Note: SNPs were identified by a genome-wide suggestive ( P<1e-5) association in a sample-size weighted meta-analysis, grouped into LD-independent genomic loci, and mapped to genes using positional mapping, eQTL mapping, and chromatin interaction strategies. Loci for genes mapped by two genomic risk loci are listed as locus1:locus2. Blue highlighted rows represent low confidence loci; see Suppleme…
GenomicLocus	Gene	Ensembl ID	Entrez ID	CHR	Start BP	End BP	pLI	posMap #SNPs	posMap Max CADD	eqtlMap #SNPs	eqtlMap minP	eqtlMap minQ	eqtlMap Tissues	eqtlMap Direction	ciMap	ciMap Tissues	minGwasP	IndSigSNPs
Ensembl ID	Gene	CHR	Start BP	End BP			Entrez ID		pLI		posMap #SNPs	posMap Max CADD	eqtlMap #SNPs	eqtlMap minP	eqtlMap minQ	eqtlMap Tissues	eqtlMap Direction	ciMap	ciMap Tissues	minGwasP	IndSigSNPs	GenomicLocus
ensg	symbol	chr	start	end	strand	type	entrezID	HUGO	pLI	ncRVIS	posMapSNPs	posMapMaxCADD	eqtlMapSNPs	eqtlMapminP	eqtlMapminQ	eqtlMapts	eqtlDirection	ciMap	ciMapts	minGwasP	IndSigSNPs	GenomicLocus
ENSG00000158286	RNF207	1	6265535	6281359	1	protein_coding	388591	RNF207	5.19011202351337e-06	-0.143922421	0	0	1	1.61543e-05	0.000578491	GTEx_v7_Adipose_Visceral_Omentum	+	No	NA	6.225e-06	rs6685095	1
ENSG00000158292	GPR153	1	6307406	6321035	-1	protein_coding	387509	GPR153	0.000377954117161823	-0.584185592	0	0	1	-9	0.049	CMC_SVA_cis	-	No	NA	9.623e-06	rs6685095	1
ENSG00000097021	ACOT7	1	6324329	6454451	-1	protein_coding	11332	ACOT7	0.381517901841213	0.283152895	1	0.23	0	NA	NA	NA	NA	No	NA	6.225e-06	rs6685095	1
ENSG00000271746	RP1-202O8.3	1	6453615	6454451	1	antisense	NA	NA	NA	NA	1	0.23	0	NA	NA	NA	NA	No	NA	6.225e-06	rs6685095	1
ENSG00000069812	HES2	1	6472478	6484730	-1	protein_coding	54626	HES2	0.0670466550651167	-0.530891859	2	6.113	2	5.68239e-07	4.75751e-06	GTEx_v7_Breast_Mammary_Tissue	+	No	NA	6.225e-06	rs6685095	1
ENSG00000187017	ESPN	1	6484848	6521430	1	protein_coding	83715	ESPN	0.00255384128821556	NA	2	6.113	2	1.08889196355407e-09	4.71351e-07	GTEx_v6_Whole_Blood:GTEx_v7_Breast_Mammary_Tissue:GTEx_v7_Whole_Blood:BIOS_eQTL_geneLevel	+	No	NA	6.225e-06	rs6685095	1
ENSG00000265392	MIR4252	1	6489894	6489956	-1	miRNA	100422975	MIR4252	NA	NA	2	6.113	0	NA	NA	NA	NA	No	NA	6.225e-06	rs6685095	1
ENSG00000231868	RP1-202O8.2	1	6503094	6507066	-1	antisense	NA	NA	NA	NA	2	6.113	0	NA	NA	NA	NA	No	NA	6.225e-06	rs6685095	1
ENSG00000215788	TNFRSF25	1	6521211	6526255	-1	protein_coding	8718	TNFRSF25	0.448738853101197	NA	2	6.113	0	NA	NA	NA	NA	No	NA	6.225e-06	rs6685095	1
ENSG00000171680	PLEKHG5	1	6526152	6580121	-1	protein_coding	57449	PLEKHG5	4.02821229083025e-05	NA	2	6.113	0	NA	NA	NA	NA	No	NA	6.225e-06	rs6685095	1
ENSG00000143001	TMEM61	1	55446465	55457966	1	protein_coding	199964	TMEM61	0.00437577280284652	NA	1	4.877	0	NA	NA	NA	NA	No	NA	6.216e-06	rs11588151	2
ENSG00000233271	RP11-12C17.2	1	55446623	55457947	-1	antisense	NA	NA	NA	NA	1	4.877	0	NA	NA	NA	NA	No	NA	6.216e-06	rs11588151	2
ENSG00000162399	BSND	1	55464606	55476556	1	protein_coding	7809	BSND	4.41379060688424e-07	2.622206016	1	4.877	1	1.38348e-20	0	GTEx_v6_Whole_Blood:GTEx_v7_Lung:GTEx_v7_Whole_Blood:BIOS_eQTL_geneLevel	-	No	NA	6.216e-06	rs11588151	2
ENSG00000169174	PCSK9	1	55505221	55530525	1	protein_coding	255738	PCSK9	1.02507611210468e-10	0.264270736	1	4.877	1	1.28221e-28	9.26278e-31	GTEx_v6_Nerve_Tibial:GTEx_v7_Lung:GTEx_v7_Nerve_Tibial:BIOS_eQTL_geneLevel	-	No	NA	6.216e-06	rs11588151	2
ENSG00000162402	USP24	1	55532032	55680786	-1	protein_coding	23358	USP24	0.999999998496473	-1.006094649	1	4.877	0	NA	NA	NA	NA	No	NA	6.216e-06	rs11588151	2
ENSG00000197323	TRIM33	1	114935399	115053781	-1	protein_coding	51592	TRIM33	0.999998355934464	0.983689465	3	7.401	0	NA	NA	NA	NA	No	NA	9.022e-06	rs74115213	3
ENSG00000226984	RP4-591B8.2	1	115002556	115002982	1	pseudogene	NA	NA	NA	NA	1	7.401	0	NA	NA	NA	NA	No	NA	4.285e-05	rs74115213	3
ENSG00000225650	EIF2S2P5	1	115010937	115011904	1	pseudogene	347675	EIF2S2P5	NA	NA	3	7.401	0	NA	NA	NA	NA	No	NA	9.022e-06	rs74115213	3
ENSG00000201114	Y_RNA	1	115033346	115033454	1	misc_RNA	NA	NA	NA	NA	3	7.401	0	NA	NA	NA	NA	No	NA	9.022e-06	rs74115213	3
ENSG00000236480	PKMP1	1	115078616	115080461	1	pseudogene	643586	PKMP1	NA	NA	3	7.401	0	NA	NA	NA	NA	No	NA	9.022e-06	rs74115213	3
ENSG00000213281	NRAS	1	115247090	115259515	-1	protein_coding	4893	NRAS	0.912772900891261	-1.243467832	0	0	1	1.62877e-05	0.00325521	GTEx_v7_Esophagus_Mucosa	+	No	NA	4.285e-05	rs74115213	3
ENSG00000134198	TSPAN2	1	115590632	115632121	-1	protein_coding	10100	TSPAN2	0.000100586967317338	1.134025592	0	0	1	4.70859e-05	0.010148	GTEx_v7_Artery_Tibial	NA	No	NA	NA	rs74115213	3
ENSG00000223947	AC016738.4	2	101610138	101618706	-1	antisense	NA	NA	NA	NA	0	0	0	NA	NA	NA	NA	Yes	hESC:IMR90:Mesenchymal_Stem_Cell:Mesendoderm	4.482e-06	rs77461169	4
ENSG00000071082	RPL31	2	101618177	101640494	1	protein_coding	6160	RPL31	0.843001842538011	-0.415153546	0	0	1	3.01938e-05	0.0184306653719887	BIOS_eQTL_geneLevel	-	Yes	hESC:IMR90:Mesenchymal_Stem_Cell:Mesendoderm	5.902e-09	rs1192824;rs77461169	4
ENSG00000204634	TBC1D8	2	101624079	101869328	-1	protein_coding	11138	TBC1D8	5.26132710714781e-07	NA	2	4.838	1	1.03426e-07	8.35794283167103e-05	BIOS_eQTL_geneLevel	-	No	NA	5.902e-09	rs77461169;rs1192824	4
ENSG00000272902	RP11-299H21.1	2	101768122	101771872	1	lincRNA	100506286	TBC1D8-AS1	NA	NA	1	0.895	1	9.6541002640617e-06	0.029875942	GTEx_v6_Esophagus_Muscularis	+	Yes	IMR90	5.902e-09	rs77461169;rs1192824	4
ENSG00000158435	CNOT11	2	101869264	101886778	1	protein_coding	55571	CNOT11	0.993507645349384	-0.657884114	1	4.838	0	NA	NA	NA	NA	No	NA	5.902e-09	rs1192824	4
ENSG00000163162	RNF149	2	101887681	101925163	-1	protein_coding	284996	RNF149	0.000502223698926861	-0.853913006	0	0	1	3.69161e-25	0	BIOS_eQTL_geneLevel	+	No	NA	5.902e-09	rs1192824	4
ENSG00000212283	SNORD89	2	101889398	101889511	-1	snoRNA	692205	SNORD89	NA	NA	0	0	1	3.69161e-25	0	BIOS_eQTL_geneLevel	+	No	NA	5.902e-09	rs1192824	4
ENSG00000205716	AC007248.6	2	102866317	102866715	-1	pseudogene	NA	NA	NA	NA	0	0	0	NA	NA	NA	NA	Yes	IMR90	4.482e-06	rs77461169	4
ENSG00000150540	HNMT	2	138721590	138773930	1	protein_coding	3176	HNMT	0.0967293826850996	0.562236353	1	1.04	1	6.6884e-05	0.00197037	SNIG:TCTX:GTEx_v7_Nerve_Tibial	+	No	NA	2.486e-06	rs12991332	5
ENSG00000168542	COL3A1	2	189839046	189877472	1	protein_coding	1281	COL3A1	0.999999998393609	-0.38876181	1	4.056	0	NA	NA	NA	NA	No	NA	4.265e-06	rs73047627	6
ENSG00000221502	MIR1245A	2	189842818	189842887	1	miRNA	100302219	MIR1245A	NA	NA	1	4.056	0	NA	NA	NA	NA	No	NA	4.265e-06	rs73047627	6
ENSG00000119041	GTF3C3	2	197627756	197664449	-1	protein_coding	9330	GTF3C3	5.35810483574069e-06	-0.234460225	0	0	0	NA	NA	NA	NA	Yes	hESC	1.441e-05	rs11695675	7
ENSG00000231621	AC013264.2	2	198062715	198063997	1	antisense	101927596	LOC101927596	NA	NA	0	0	0	NA	NA	NA	NA	Yes	Mesenchymal_Stem_Cell:Mesendoderm	1.441e-05	rs11695675	7
ENSG00000144381	HSPD1	2	198351305	198381461	-1	protein_coding	3329	HSPD1	0.985208243840261	-0.813832273	0	0	0	NA	NA	NA	NA	Yes	Mesenchymal_Stem_Cell	1.441e-05	rs11695675	7
ENSG00000115541	HSPE1	2	198364718	198368181	1	protein_coding	3336	HSPE1	0.787528047849985	-0.835658197	0	0	0	NA	NA	NA	NA	Yes	Mesenchymal_Stem_Cell	1.441e-05	rs11695675	7
ENSG00000270757	HSPE1-MOB4	2	198365137	198415450	1	protein_coding	100529241	HSPE1-MOB4	0.889798357973135	NA	0	0	0	NA	NA	NA	NA	Yes	Mesenchymal_Stem_Cell	1.441e-05	rs11695675	7
ENSG00000115540	MOB4	2	198380295	198418423	1	protein_coding	25843	MOB4	0.777832909994367	-1.626843079	0	0	0	NA	NA	NA	NA	Yes	Mesenchymal_Stem_Cell	1.441e-05	rs11695675	7
ENSG00000247626	MARS2	2	198570087	198573113	1	protein_coding	92935	MARS2	1.41647403486977e-06	-0.302062448	0	0	0	NA	NA	NA	NA	Yes	Mesenchymal_Stem_Cell	1.441e-05	rs11695675	7
ENSG00000152430	BOLL	2	198591603	198651486	-1	protein_coding	66037	BOLL	0.00790218351286136	-1.241883899	0	0	0	NA	NA	NA	NA	Yes	Left_Ventricle:Mesenchymal_Stem_Cell:Mesendoderm:Neural_Progenitor_Cell	1.441e-05	rs11695675	7
ENSG00000115896	PLCL1	2	198669426	199437305	1	protein_coding	5334	PLCL1	0.0110523707623017	NA	0	0	0	NA	NA	NA	NA	Yes	Left_Ventricle:Mesenchymal_Stem_Cell:Mesendoderm:Neural_Progenitor_Cell	1.441e-05	rs11695675	7
ENSG00000119042	SATB2	2	200134223	200335989	-1	protein_coding	23314	SATB2	0.99956300698079	-1.169766173	0	0	0	NA	NA	NA	NA	Yes	Mesenchymal_Stem_Cell:Mesendoderm:Trophoblast-like_Cell	1.441e-05	rs11695675	7
ENSG00000225953	SATB2-AS1	2	200322423	200341658	1	antisense	150538	SATB2-AS1	NA	NA	0	0	0	NA	NA	NA	NA	Yes	Mesenchymal_Stem_Cell:Mesendoderm:Trophoblast-like_Cell	1.441e-05	rs11695675	7
ENSG00000213938	SEPHS1P6	2	200524274	200525452	1	pseudogene	729399	SEPHS1P6	NA	NA	0	0	11	-9	1.33316e-19	CMC_NoSVA_cis:CMC_SVA_cis:GTEx_v6_Adrenal_Gland:GTEx_v6_Brain_Caudate_basal_ganglia:GTEx_v6_Brain_Cortex:GTEx_v6_Brain_Frontal_Cortex_BA9:GTEx_v6_Brain_Nucleus_accumbens_basal_ganglia:GTEx_v6_Brain_Putamen_basal_ganglia:GTEx_v6_Muscle_Skeletal:GTEx_v6_Thyroid:GTEx_v7_Adipose_Subcutaneous:GTEx_v7_Adrenal_Gland:GTEx_v7_Brain_Amygdala:GTEx_v7_Brain_Caudate_basal_ganglia:GTEx_v7_Brain_Cortex:GTEx_v7_…	+	Yes	hESC:IMR90:Mesenchymal_Stem_Cell:Mesendoderm	3.484e-07	rs11695675	7
ENSG00000226124	FTCDNL1	2	200625267	200715896	-1	protein_coding	348751	FTCDNL1	NA	NA	11	6.782	11	-9	0	CMC_NoSVA_cis:CMC_SVA_cis:GTEx_v6_Adipose_Subcutaneous:GTEx_v6_Adipose_Visceral_Omentum:GTEx_v6_Adrenal_Gland:GTEx_v6_Artery_Aorta:GTEx_v6_Artery_Coronary:GTEx_v6_Artery_Tibial:GTEx_v6_Brain_Anterior_cingulate_cortex_BA24:GTEx_v6_Brain_Caudate_basal_ganglia:GTEx_v6_Brain_Cerebellar_Hemisphere:GTEx_v6_Brain_Cerebellum:GTEx_v6_Brain_Cortex:GTEx_v6_Brain_Frontal_Cortex_BA9:GTEx_v6_Brain_Hippocampus:…	-	Yes	hESC:IMR90:Mesenchymal_Stem_Cell:Mesendoderm:Trophoblast-like_Cell	3.484e-07	rs11695675	7
ENSG00000232732	AC073043.1	2	200732119	200775882	-1	processed_transcript	NA	NA	NA	NA	0	0	0	NA	NA	NA	NA	Yes	hESC:Mesendoderm	1.441e-05	rs11695675	7
ENSG00000178074	C2orf69	2	200775979	200820658	1	protein_coding	205327	C2orf69	0.432171539151161	-0.595155149	0	0	0	NA	NA	NA	NA	Yes	hESC:Mesendoderm	1.441e-05	rs11695675	7
ENSG00000243478	AOX2P	2	201560640	201658962	1	pseudogene	344454	AOX2P	NA	NA	0	0	0	NA	NA	NA	NA	Yes	hESC	1.441e-05	rs11695675	7
ENSG00000237166	AC007163.3	2	201577028	201599900	-1	lincRNA	100507140	LINC01792	NA	NA	0	0	0	NA	NA	NA	NA	Yes	hESC	1.441e-05	rs11695675	7
ENSG00000169047	IRS1	2	227596033	227664475	-1	protein_coding	3667	IRS1	0.218507352371316	-1.69763346	0	0	0	NA	NA	NA	NA	Yes	hESC	0.0003288	rs12465362	8
ENSG00000272622	RP11-395N3.2	2	227664862	227675745	1	lincRNA	NA	NA	NA	NA	0	0	0	NA	NA	NA	NA	Yes	hESC	0.0003288	rs12465362	8
ENSG00000081052	COL4A4	2	227867427	228028829	-1	protein_coding	1286	COL4A4	1.68977859995688e-08	-1.720840672	0	0	0	NA	NA	NA	NA	Yes	hESC:IMR90	0.0003288	rs12465362	8
ENSG00000169031	COL4A3	2	228029281	228179508	1	protein_coding	1285	COL4A3	7.57550007722727e-05	0.806121191	0	0	0	NA	NA	NA	NA	Yes	hESC:IMR90	0.0003288	rs12465362	8
ENSG00000236432	AC097662.2	2	228085768	228189917	-1	antisense	654841	LOC654841	NA	NA	0	0	0	NA	NA	NA	NA	Yes	hESC:IMR90:Mesenchymal_Stem_Cell:Mesendoderm	0.0003288	rs12465362	8
ENSG00000168958	MFF	2	228189867	228222550	1	protein_coding	56947	MFF	0.375813389382855	1.451440907	0	0	0	NA	NA	NA	NA	Yes	hESC:IMR90:Mesenchymal_Stem_Cell:Mesendoderm	0.0003288	rs12465362	8
ENSG00000266382	MIR5703	2	228336848	228336903	1	miRNA	100847081	MIR5703	NA	NA	0	0	0	NA	NA	NA	NA	Yes	hESC:IMR90:Mesenchymal_Stem_Cell:Mesendoderm	0.0003288	rs12465362	8
ENSG00000173744	AGFG1	2	228336868	228425930	1	protein_coding	3267	AGFG1	0.969265961919115	NA	0	0	0	NA	NA	NA	NA	Yes	hESC:IMR90:Mesenchymal_Stem_Cell:Mesendoderm	0.0003288	rs12465362	8
ENSG00000135917	SLC19A3	2	228549926	228582728	-1	protein_coding	80704	SLC19A3	0.00163108657525026	0.173701146	0	0	0	NA	NA	NA	NA	Yes	hESC:IMR90:Mesenchymal_Stem_Cell:Mesendoderm	0.0003288	rs12465362	8
ENSG00000183514	TDGF1P2	2	228734799	228735360	-1	pseudogene	22816	TDGF1P2	NA	NA	0	0	0	NA	NA	NA	NA	Yes	hESC:IMR90:Left_Ventricle:Mesenchymal_Stem_Cell:Mesendoderm	0.0003288	rs12465362	8
ENSG00000123977	DAW1	2	228735770	228789060	1	protein_coding	164781	DAW1	0.00078594792223416	0.41609241	0	0	0	NA	NA	NA	NA	Yes	hESC:IMR90:Left_Ventricle:Mesenchymal_Stem_Cell:Mesendoderm	0.0003288	rs12465362	8
ENSG00000153820	SPHKAP	2	228844666	229046361	-1	protein_coding	80309	SPHKAP	0.233358014706211	-0.799534869	0	0	0	NA	NA	NA	NA	Yes	IMR90:Mesenchymal_Stem_Cell:Mesendoderm	0.0003288	rs12465362	8
ENSG00000153823	PID1	2	229715242	230136001	-1	protein_coding	55022	PID1	0.403719374100703	0.742126993	0	0	0	NA	NA	NA	NA	Yes	hESC:IMR90:Mesenchymal_Stem_Cell:Mesendoderm:Trophoblast-like_Cell	0.0003288	rs12465362	8
ENSG00000187957	DNER	2	230222345	230579274	-1	protein_coding	92737	DNER	0.785502089513872	-0.191028172	59	18.67	3	1.3677e-05	0.0110138	GTEx_v7_Lung	+	No	NA	7.627e-06	rs12465362	8
ENSG00000235993	AC007559.1	2	230566510	230566864	1	pseudogene	NA	NA	NA	NA	59	18.67	0	NA	NA	NA	NA	No	NA	7.627e-06	rs12465362	8
ENSG00000153827	TRIP12	2	230628554	230787955	-1	protein_coding	9320	TRIP12	0.999999999999483	-0.142345007	42	18.67	52	4.09239e-20	0	GTEx_v7_Muscle_Skeletal:GTEx_v7_Testis:BIOS_eQTL_geneLevel	-	No	NA	7.627e-06	rs12465362	8
ENSG00000153832	FBXO36	2	230787018	230877825	1	protein_coding	130888	FBXO36	3.22841418359222e-06	-0.280077894	0	0	11	6.46343e-06	0.000140727	GTEx_v7_Esophagus_Gastroesophageal_Junction	-	No	NA	3.097e-05	rs12465362	8
ENSG00000185404	SP140L	2	231191899	231268447	1	protein_coding	93349	SP140L	6.06952429760381e-05	1.532928638	0	0	0	NA	NA	NA	NA	Yes	hESC	0.0003288	rs12465362	8
ENSG00000180385	EMC3-AS1	3	10028577	10048674	1	pseudogene	442075	EMC3-AS1	NA	NA	0	0	0	NA	NA	NA	NA	Yes	IMR90	0.0008649	rs7619102	9
ENSG00000144559	TAMM41	3	11831916	11888393	-1	protein_coding	132001	TAMM41	0.000184600184419332	0.129452253	0	0	0	NA	NA	NA	NA	Yes	Mesendoderm	0.000776	rs7619102	9
ENSG00000157152	SYN2	3	12045876	12232900	1	processed_transcript	6854	SYN2	NA	NA	0	0	0	NA	NA	NA	NA	Yes	Trophoblast-like_Cell	0.0008649	rs7619102	9
ENSG00000157150	TIMP4	3	12194551	12200851	-1	protein_coding	7079	TIMP4	0.00355403121695193	-0.237345291	0	0	0	NA	NA	NA	NA	Yes	Aorta:GM12878:hESC:IMR90:Left_Ventricle:Liver:Lung:Mesenchymal_Stem_Cell:Mesendoderm:Right_Ventricle:Spleen:Trophoblast-like_Cell	4.972e-05	rs7619102	9
ENSG00000132170	PPARG	3	12328867	12475855	1	protein_coding	5468	PPARG	0.668218173785609	-0.331736114	24	21.6	0	NA	NA	NA	NA	Yes	hESC:IMR90:Left_Ventricle:Mesenchymal_Stem_Cell:Mesendoderm	0.0003566	rs7619102	9
ENSG00000154743	TSEN2	3	12525931	12581122	1	protein_coding	80746	TSEN2	0.000104861288702718	-0.025724942	55	21.6	16	1.03374e-18	0	GTEx_v6_Cells_Transformed_fibroblasts:GTEx_v7_Artery_Tibial:GTEx_v7_Brain_Cerebellum:GTEx_v7_Cells_Transformed_fibroblasts:GTEx_v7_Esophagus_Mucosa:GTEx_v7_Esophagus_Muscularis:BIOS_eQTL_geneLevel	+	Yes	hESC:IMR90:Mesenchymal_Stem_Cell:Mesendoderm	0.0001954	rs7619102	9
ENSG00000251777	RNU6-404P	3	12543122	12543203	-1	snRNA	NA	RNU6-404P	NA	NA	45	21.6	0	NA	NA	NA	NA	No	NA	0.0004616	rs7619102	9
ENSG00000200114	RNA5SP123	3	12552594	12552712	-1	rRNA	100873393	RNA5SP123	NA	NA	49	21.6	0	NA	NA	NA	NA	No	NA	0.0004616	rs7619102	9
ENSG00000251774	RNU6-377P	3	12556205	12556306	1	snRNA	106479733	RNU6-377P	NA	NA	50	21.6	0	NA	NA	NA	NA	No	NA	0.0003566	rs7619102	9
ENSG00000225526	C3orf83	3	12556433	12602558	-1	protein_coding	100129480	C3orf83	NA	0.037136844	59	21.6	3	7.09577e-06	1.08895e-12	GTEx_v7_Heart_Left_Ventricle	+	No	NA	7.228e-05	rs7619102	9
ENSG00000075975	MKRN2	3	12598513	12625212	1	protein_coding	23609	MKRN2	0.407628906147087	-0.031498412	29	9.652	3	1.46905e-06	0.00120844354545926	BIOS_eQTL_geneLevel	+	Yes	GM12878:hESC:IMR90:Mesenchymal_Stem_Cell:Mesendoderm:Trophoblast-like_Cell	4.972e-05	rs7619102	9
ENSG00000132155	RAF1	3	12625100	12705725	-1	protein_coding	5894	RAF1	0.999776866110749	-1.160187764	39	10.16	3	-9	0.00120844354545926	CMC_SVA_cis:BIOS_eQTL_geneLevel	-	Yes	GM12878:IMR90:Mesenchymal_Stem_Cell	7.65e-06	rs7619102	9
ENSG00000239140	snoU13	3	12674233	12674333	1	snoRNA	NA	NA	NA	NA	23	10.16	0	NA	NA	NA	NA	No	NA	2.569e-05	rs7619102	9
ENSG00000233252	CRIP1P1	3	12715198	12715382	1	pseudogene	106480793	CRIP1P1	NA	NA	21	10.16	0	NA	NA	NA	NA	No	NA	7.65e-06	rs7619102	9
ENSG00000088726	TMEM40	3	12775024	12810956	-1	protein_coding	55287	TMEM40	0.000135844028608561	0.223164047	8	2.096	0	NA	NA	NA	NA	No	NA	7.65e-06	rs7619102	9
ENSG00000213943	KRT18P17	3	12828892	12830170	-1	pseudogene	344866	KRT18P17	NA	NA	2	1.753	0	NA	NA	NA	NA	No	NA	0.0009196	rs7619102	9
ENSG00000144712	CAND2	3	12837971	12913415	1	protein_coding	23066	CAND2	4.5328114836349e-09	0.140801091	2	1.753	0	NA	NA	NA	NA	No	NA	0.0009196	rs7619102	9
ENSG00000272263	RP11-767C1.2	3	12873718	12874227	-1	antisense	NA	NA	NA	NA	2	1.753	0	NA	NA	NA	NA	No	NA	0.0009196	rs7619102	9
ENSG00000144713	RPL32	3	12875984	12883087	-1	protein_coding	6161	RPL32	0.755582037585297	-0.734107715	2	1.753	0	NA	NA	NA	NA	No	NA	0.0009196	rs7619102	9
ENSG00000207496	SNORA7A	3	12881811	12881949	-1	snoRNA	619563	SNORA7A	NA	NA	1	1.753	0	NA	NA	NA	NA	No	NA	0.0009196	rs7619102	9
ENSG00000151090	THRB	3	24158651	24536773	-1	protein_coding	7068	THRB	0.994541861187431	-1.119632523	4	15.05	0	NA	NA	NA	NA	No	NA	6.569e-06	rs869784	10
ENSG00000265028	MIR4792	3	24562853	24562926	-1	miRNA	NA	MIR4792	NA	NA	0	0	0	NA	NA	NA	NA	Yes	hESC:IMR90:Mesenchymal_Stem_Cell:Mesendoderm	5.002e-05	rs869784	10
ENSG00000114541	FRMD4B	3	69219141	69591734	-1	protein_coding	23150	FRMD4B	0.807013707732818	-0.177870421	2	1.385	0	NA	NA	NA	NA	No	NA	7.453e-06	rs9834968	11
ENSG00000239263	RBM43P1	3	69520603	69521683	-1	pseudogene	100131568	RBM43P1	NA	NA	1	1.013	0	NA	NA	NA	NA	No	NA	7.453e-06	rs9834968	11
ENSG00000240265	RP11-62G11.1	3	69584815	69585844	-1	pseudogene	NA	NA	NA	NA	2	1.385	0	NA	NA	NA	NA	No	NA	7.453e-06	rs9834968	11
ENSG00000240842	RP11-62G11.2	3	69613257	69620273	-1	lincRNA	NA	NA	NA	NA	1	1.385	0	NA	NA	NA	NA	No	NA	2.092e-05	rs9834968	11
ENSG00000163870	TPRA1	3	127291912	127317094	-1	protein_coding	131601	TPRA1	0.0583580196535496	0.022236777	3	1.999	12	3.86388e-68	0	xQTLServer_eQTLs:GTEx_v6_Artery_Tibial:GTEx_v6_Brain_Cerebellum:GTEx_v6_Heart_Left_Ventricle:GTEx_v6_Muscle_Skeletal:GTEx_v6_Pancreas:GTEx_v6_Thyroid:GTEx_v7_Adipose_Subcutaneous:GTEx_v7_Brain_Cerebellum:GTEx_v7_Brain_Cortex:GTEx_v7_Colon_Sigmoid:GTEx_v7_Esophagus_Gastroesophageal_Junction:GTEx_v7_Esophagus_Muscularis:GTEx_v7_Heart_Left_Ventricle:GTEx_v7_Muscle_Skeletal:GTEx_v7_Nerve_Tibial:GTEx_…	-	No	NA	4.318e-06	rs782444	12
ENSG00000073111	MCM2	3	127317066	127341276	1	protein_coding	4171	MCM2	0.509038119651144	-1.221096084	3	1.999	2	2.97516e-05	0.0188398	GTEx_v7_Whole_Blood	+	No	NA	0.0001187	rs782444	12
ENSG00000114631	PODXL2	3	127348024	127391652	1	protein_coding	50512	PODXL2	0.977986099041167	NA	12	9.044	11	1.13187e-46	0	GTEx_v6_Whole_Blood:GTEx_v7_Whole_Blood:BIOS_eQTL_geneLevel	+	No	NA	4.318e-06	rs782444	12
ENSG00000221413	AC023593.1	3	127383547	127383653	1	miRNA	NA	NA	NA	NA	10	9.044	0	NA	NA	NA	NA	No	NA	4.318e-06	rs782444	12
ENSG00000114626	ABTB1	3	127391778	127399768	1	protein_coding	80325	ABTB1	0.00129830665139568	NA	9	9.044	10	9.93817e-10	6.0013202904639e-06	BIOS_eQTL_geneLevel	+	No	NA	4.318e-06	rs782444	12
ENSG00000074416	MGLL	3	127407909	127542051	-1	protein_coding	11343	MGLL	0.00459891048076127	-0.852019353	9	9.044	10	-9	1.91039347988e-15	xQTLServer_eQTLs:CMC_SVA_cis	-	No	NA	4.318e-06	rs782444	12
ENSG00000187715	KBTBD12	3	127634075	127706514	1	protein_coding	166348	KBTBD12	9.96465322017853e-13	0.083759422	0	0	0	NA	NA	NA	NA	Yes	IMR90	4.318e-06	rs782444	12
ENSG00000058262	SEC61A1	3	127770484	127790526	1	protein_coding	29927	SEC61A1	0.995608071830047	-0.464768275	0	0	0	NA	NA	NA	NA	Yes	GM12878:IMR90:Mesenchymal_Stem_Cell	4.318e-06	rs782444	12
ENSG00000222627	RNU2-37P	3	127793916	127794092	-1	snRNA	106480213	RNU2-37P	NA	NA	0	0	0	NA	NA	NA	NA	Yes	GM12878:IMR90:Mesenchymal_Stem_Cell	4.318e-06	rs782444	12
ENSG00000239608	RUVBL1-AS1	3	127794653	127797899	1	antisense	100874089	RUVBL1-AS1	NA	NA	0	0	0	NA	NA	NA	NA	Yes	GM12878:IMR90:Mesenchymal_Stem_Cell	4.318e-06	rs782444	12
ENSG00000163694	RBM47	4	40425272	40632892	-1	protein_coding	54502	RBM47	0.958532355471074	-0.203590944	1	2.17	0	NA	NA	NA	NA	No	NA	3.202e-06	rs76169119	13
ENSG00000244245	RP11-120B7.1	5	107929310	107929668	1	pseudogene	NA	NA	NA	NA	3	6.854	0	NA	NA	NA	NA	No	NA	1.056e-06	rs77655815	14
ENSG00000164284	GRPEL2	5	148724993	148734146	1	protein_coding	134266	GRPEL2	0.00575467231542279	-1.147270481	0	0	0	NA	NA	NA	NA	Yes	IMR90:Mesenchymal_Stem_Cell	1.144e-05	rs10454990	15
ENSG00000253618	GRPEL2-AS1	5	148727679	148737205	-1	antisense	106144529	GRPEL2-AS1	NA	NA	0	0	0	NA	NA	NA	NA	Yes	IMR90:Mesenchymal_Stem_Cell	1.144e-05	rs10454990	15
ENSG00000145882	PCYOX1L	5	148737570	148749216	1	protein_coding	78991	PCYOX1L	1.26712222774021e-05	0.75823636	0	0	4	2.06633e-05	0.0132625246733716	BIOS_eQTL_geneLevel	-	Yes	IMR90:Mesenchymal_Stem_Cell	5.166e-06	rs10454990	15
ENSG00000127743	IL17B	5	148750887	148783765	-1	protein_coding	27190	IL17B	0.00207428402959818	0.115088564	2	11.47	0	NA	NA	NA	NA	No	NA	8.571e-05	rs10454990	15
ENSG00000253865	RP11-394O4.3	5	148751737	148754679	1	antisense	NA	NA	NA	NA	0	0	0	NA	NA	NA	NA	Yes	IMR90:Mesenchymal_Stem_Cell	1.144e-05	rs10454990	15
ENSG00000249669	MIR143HG	5	148786252	148808241	1	lincRNA	728264	MIR143HG	NA	NA	7	12.18	0	NA	NA	NA	NA	Yes	IMR90	5.166e-06	rs10454990	15
ENSG00000253864	AC131025.8	5	148786526	148793660	1	lincRNA	NA	NA	NA	NA	7	12.18	0	NA	NA	NA	NA	Yes	IMR90	5.166e-06	rs10454990	15
ENSG00000208035	MIR143	5	148808481	148808586	1	miRNA	406935	MIR143	NA	NA	7	12.18	7	1.37179922356305e-05	0.00834853034555438	MEDU	NA	No	NA	5.166e-06	rs10454990	15
ENSG00000269936	MIR145	5	148809849	148812397	1	lincRNA	406937	MIR145	NA	NA	7	12.18	0	NA	NA	NA	NA	No	NA	5.166e-06	rs10454990	15
ENSG00000113712	CSNK1A1	5	148871760	148931007	-1	protein_coding	1452	CSNK1A1	0.993657229734498	-0.260284522	7	12.18	0	NA	NA	NA	NA	Yes	IMR90	5.166e-06	rs10454990	15
ENSG00000230551	CTB-89H12.4	5	148872949	148884233	-1	processed_transcript	NA	NA	NA	NA	7	12.18	0	NA	NA	NA	NA	No	NA	5.166e-06	rs10454990	15
ENSG00000183111	ARHGEF37	5	148931510	149014531	1	protein_coding	389337	ARHGEF37	1.08240046485854e-13	-0.615363367	0	0	0	NA	NA	NA	NA	Yes	IMR90	1.144e-05	rs10454990	15
ENSG00000233085	XXyac-YX65C7_A.3	6	169686629	169689311	-1	lincRNA	NA	NA	NA	NA	7	6.436	0	NA	NA	NA	NA	No	NA	2.298e-06	rs62435247	16
ENSG00000224999	XXyac-YX65C7_A.4	6	169696566	169698054	-1	pseudogene	NA	NA	NA	NA	7	6.436	3	1.79837e-07	1.74774e-05	GTEx_v7_Lung:GTEx_v7_Skin_Not_Sun_Exposed_Suprapubic:GTEx_v7_Skin_Sun_Exposed_Lower_leg	-	No	NA	2.298e-06	rs62435247	16
ENSG00000226194	RP1-137D17.1	6	169770093	169788480	-1	lincRNA	NA	NA	NA	NA	7	6.436	2	2.21585e-12	1.24703e-16	GTEx_v6_Artery_Aorta:GTEx_v6_Esophagus_Mucosa:GTEx_v6_Esophagus_Muscularis:GTEx_v6_Testis:GTEx_v7_Adipose_Subcutaneous:GTEx_v7_Artery_Aorta:GTEx_v7_Colon_Sigmoid:GTEx_v7_Colon_Transverse:GTEx_v7_Esophagus_Gastroesophageal_Junction:GTEx_v7_Esophagus_Mucosa:GTEx_v7_Esophagus_Muscularis:GTEx_v7_Heart_Atrial_Appendage:GTEx_v7_Nerve_Tibial:GTEx_v7_Pituitary:GTEx_v7_Testis:GTEx_v7_Thyroid	+	No	NA	2.298e-06	rs62435247	16
ENSG00000130226	DPP6	7	153584182	154685995	1	protein_coding	1804	DPP6	0.96769110706309	NA	1	2.792	0	NA	NA	NA	NA	No	NA	1.648e-06	rs62475193	17
ENSG00000147687	TATDN1	8	125500726	125551699	-1	protein_coding	83940	TATDN1	1.72640600686597e-08	0.357863168	0	0	0	NA	NA	NA	NA	Yes	GM12878:IMR90:Mesenchymal_Stem_Cell:Trophoblast-like_Cell	8.296e-06	rs16900766	18
ENSG00000147684	NDUFB9	8	125551344	125580751	1	protein_coding	4715	NDUFB9	0.0428894468164687	-0.016587227	0	0	0	NA	NA	NA	NA	Yes	GM12878:IMR90:Mesenchymal_Stem_Cell:Trophoblast-like_Cell	8.296e-06	rs16900766	18
ENSG00000180938	ZNF572	8	125985540	125991631	1	protein_coding	137209	ZNF572	0.000651450621070101	-0.137914163	0	0	0	NA	NA	NA	NA	Yes	GM12878:Mesenchymal_Stem_Cell	8.296e-06	rs16900766	18
ENSG00000253513	RP11-6D1.3	8	126009227	126010440	-1	antisense	105375744	LOC105375744	NA	NA	0	0	0	NA	NA	NA	NA	Yes	GM12878:hESC:IMR90:Left_Ventricle:Liver:Mesenchymal_Stem_Cell:Mesendoderm	8.296e-06	rs16900766	18
ENSG00000104549	SQLE	8	126010739	126034525	1	protein_coding	6713	SQLE	0.91297067975512	1.171693492	0	0	0	NA	NA	NA	NA	Yes	GM12878:hESC:IMR90:Left_Ventricle:Liver:Mesenchymal_Stem_Cell:Mesendoderm	8.296e-06	rs16900766	18
ENSG00000164961	KIAA0196	8	126036502	126104082	-1	protein_coding	9897	KIAA0196	4.81024990398197e-13	-0.762157486	0	0	0	NA	NA	NA	NA	Yes	Aorta:GM12878:hESC:IMR90:Left_Ventricle:Liver:Mesenchymal_Stem_Cell:Mesendoderm:Spleen:Trophoblast-like_Cell	8.296e-06	rs16900766	18
ENSG00000156831	NSMCE2	8	126103921	126379362	1	protein_coding	286053	NSMCE2	0.0724507212755206	-0.471934498	0	0	0	NA	NA	NA	NA	Yes	Aorta:GM12878:hESC:IMR90:Left_Ventricle:Liver:Mesenchymal_Stem_Cell:Mesendoderm:Spleen:Trophoblast-like_Cell	8.296e-06	rs16900766	18
ENSG00000249859	PVT1	8	128806779	129113499	1	processed_transcript	5820	PVT1	NA	NA	0	0	0	NA	NA	NA	NA	Yes	IMR90	8.296e-06	rs16900766	18
ENSG00000151240	DIP2C	10	320130	735683	-1	protein_coding	22982	DIP2C	0.999999838277401	-1.342826815	62	10.87	0	NA	NA	NA	NA	Yes	hESC:IMR90:Left_Ventricle:Mesenchymal_Stem_Cell:Mesendoderm:Spleen:Trophoblast-like_Cell	7.97e-07	rs74509340	19
ENSG00000239822	RN7SL754P	10	476181	476444	-1	misc_RNA	106479497	RN7SL754P	NA	NA	45	10.87	0	NA	NA	NA	NA	No	NA	7.97e-07	rs74509340	19
ENSG00000233021	RP11-490E15.2	10	483501	487110	1	antisense	NA	NA	NA	NA	51	10.87	0	NA	NA	NA	NA	No	NA	7.97e-07	rs74509340	19
ENSG00000225140	RP11-809C18.3	10	674578	677195	1	antisense	101930421	LOC101930421	NA	NA	0	0	0	NA	NA	NA	NA	Yes	hESC:IMR90:Left_Ventricle:Mesenchymal_Stem_Cell:Mesendoderm:Trophoblast-like_Cell	7.97e-07	rs74509340	19
ENSG00000107929	LARP4B	10	855484	977564	-1	protein_coding	23185	LARP4B	0.999885803939474	-0.657955891	0	0	0	NA	NA	NA	NA	Yes	IMR90:Mesenchymal_Stem_Cell	7.97e-07	rs74509340	19
ENSG00000205740	AL359878.1	10	1017097	1034281	-1	protein_coding	NA	NA	NA	NA	0	0	0	NA	NA	NA	NA	Yes	IMR90:Left_Ventricle:Mesenchymal_Stem_Cell:Mesendoderm:Trophoblast-like_Cell	7.97e-07	rs74509340	19
ENSG00000107937	GTPBP4	10	1034338	1065876	1	protein_coding	23560	GTPBP4	0.999865566823629	1.570225603	0	0	0	NA	NA	NA	NA	Yes	IMR90:Left_Ventricle:Mesenchymal_Stem_Cell:Mesendoderm:Trophoblast-like_Cell	7.97e-07	rs74509340	19
ENSG00000273001	RP11-118K6.3	10	3107616	3108193	-1	lincRNA	NA	NA	NA	NA	0	0	0	NA	NA	NA	NA	Yes	Trophoblast-like_Cell	NA	rs74509340	19
ENSG00000067057	PFKP	10	3108525	3179904	1	protein_coding	5214	PFKP	7.08342752970718e-15	NA	0	0	0	NA	NA	NA	NA	Yes	Trophoblast-like_Cell	NA	rs74509340	19
ENSG00000197467	COL13A1	10	71561644	71724031	1	protein_coding	1305	COL13A1	0.0039289675922385	0.409844169	1	1.543	0	NA	NA	NA	NA	No	NA	3.018e-06	rs114020277	20
ENSG00000224222	RP11-262I2.2	10	71754382	71767592	-1	lincRNA	NA	NA	NA	NA	2	5.681	0	NA	NA	NA	NA	No	NA	3.018e-06	rs114020277;rs144552991	20
ENSG00000099284	H2AFY2	10	71812552	71872036	1	protein_coding	55506	H2AFY2	0.975641110489864	-0.702378183	1	5.681	0	NA	NA	NA	NA	No	NA	3.964e-06	rs144552991	20
ENSG00000042286	AIFM2	10	71857979	71892690	-1	protein_coding	84883	AIFM2	1.41216409648831e-07	0.816607196	1	5.681	0	NA	NA	NA	NA	No	NA	3.964e-06	rs144552991	20
ENSG00000119917	IFIT3	10	91087651	91100728	1	protein_coding	3437	IFIT3	0.00442653331666044	1.754638262	0	0	1	6.246e-06	0.0430758	GTEx_v7_Vagina	+	No	NA	9.949e-06	rs114248843	21
ENSG00000185745	IFIT1	10	91152303	91163745	1	protein_coding	3434	IFIT1	0.00534820018141597	0.443641667	0	0	1	7.92338e-08	0.00156467	GTEx_v7_Vagina	+	No	NA	9.949e-06	rs114248843	21
ENSG00000251363	RP11-129M6.1	14	41424103	41445082	1	lincRNA	NA	NA	NA	NA	0	0	0	NA	NA	NA	NA	Yes	hESC:IMR90:Left_Ventricle:Mesenchymal_Stem_Cell:Mesendoderm	1.961e-06	rs1546993	25
ENSG00000258636	CTD-2298J14.2	14	42057064	42074059	-1	lincRNA	NA	NA	NA	NA	0	0	0	NA	NA	NA	NA	Yes	hESC:IMR90:Mesenchymal_Stem_Cell:Mesendoderm:Trophoblast-like_Cell	1.961e-06	rs1546993	25
ENSG00000165379	LRFN5	14	42076773	42373752	1	protein_coding	145581	LRFN5	0.712324783241459	0.122069049	0	0	0	NA	NA	NA	NA	Yes	hESC:IMR90:Mesenchymal_Stem_Cell:Mesendoderm:Trophoblast-like_Cell	1.961e-06	rs1546993	25
ENSG00000103460	TOX3	16	52471917	52581714	-1	protein_coding	27324	TOX3	0.99433910835596	NA	0	0	0	NA	NA	NA	NA	Yes	Aorta	NA	rs60889063	26
ENSG00000166971	AKTIP	16	53524952	53538323	-1	protein_coding	64400	AKTIP	0.788012645511726	-0.341576304	0	0	0	NA	NA	NA	NA	Yes	Mesenchymal_Stem_Cell	NA	rs60889063	26
ENSG00000103494	RPGRIP1L	16	53631595	53737850	-1	protein_coding	23322	RPGRIP1L	1.19937665171712e-18	-0.756693202	0	0	0	NA	NA	NA	NA	Yes	hESC:Left_Ventricle:Mesenchymal_Stem_Cell:Mesendoderm	NA	rs60889063	26
ENSG00000140718	FTO	16	53737875	54155853	1	protein_coding	79068	FTO	0.0113445756239307	0.293683447	0	0	0	NA	NA	NA	NA	Yes	hESC:Left_Ventricle:Mesenchymal_Stem_Cell:Mesendoderm	NA	rs60889063	26
ENSG00000260194	RP11-357N13.2	16	54032225	54033881	-1	antisense	NA	NA	NA	NA	0	0	0	NA	NA	NA	NA	Yes	hESC:IMR90:Mesenchymal_Stem_Cell:Mesendoderm:Trophoblast-like_Cell	NA	rs60889063	26
ENSG00000177508	IRX3	16	54317216	54320675	-1	protein_coding	79191	IRX3	NA	NA	5	21.5	0	NA	NA	NA	NA	Yes	hESC:IMR90:Left_Ventricle:Mesenchymal_Stem_Cell:Mesendoderm:Neural_Progenitor_Cell:Pancreas:Spleen:Trophoblast-like_Cell	8.487e-05	rs60889063	26
ENSG00000261803	RP11-434E6.2	16	54399919	54404611	-1	lincRNA	100996345	LINC02140	NA	NA	10	21.5	0	NA	NA	NA	NA	Yes	hESC:IMR90:Left_Ventricle:Mesenchymal_Stem_Cell:Mesendoderm:Neural_Progenitor_Cell:Trophoblast-like_Cell	4.386e-06	rs60889063	26
ENSG00000245694	CRNDE	16	54952775	54963101	-1	lincRNA	101927480	CRNDE	NA	NA	0	0	0	NA	NA	NA	NA	Yes	hESC:IMR90:Left_Ventricle:Liver:Mesenchymal_Stem_Cell:Mesendoderm:Neural_Progenitor_Cell:Trophoblast-like_Cell	NA	rs60889063	26
ENSG00000176842	IRX5	16	54964774	54968397	1	protein_coding	10265	IRX5	NA	NA	0	0	0	NA	NA	NA	NA	Yes	hESC:IMR90:Left_Ventricle:Liver:Mesenchymal_Stem_Cell:Mesendoderm:Neural_Progenitor_Cell:Trophoblast-like_Cell	NA	rs60889063	26
ENSG00000259711	CTD-3032H12.2	16	54968825	54988577	1	lincRNA	NA	NA	NA	NA	0	0	0	NA	NA	NA	NA	Yes	hESC:IMR90:Left_Ventricle:Liver:Mesenchymal_Stem_Cell:Mesendoderm:Neural_Progenitor_Cell:Trophoblast-like_Cell	NA	rs60889063	26
ENSG00000259725	CTD-3032H12.1	16	54971698	54972583	-1	lincRNA	NA	NA	NA	NA	0	0	0	NA	NA	NA	NA	Yes	hESC:IMR90:Left_Ventricle:Liver:Mesenchymal_Stem_Cell:Mesendoderm:Neural_Progenitor_Cell:Trophoblast-like_Cell	NA	rs60889063	26
ENSG00000159387	IRX6	16	55357672	55364672	1	protein_coding	79190	IRX6	2.81616051778102e-08	0.438476122	0	0	0	NA	NA	NA	NA	Yes	Aorta:hESC:IMR90:Left_Ventricle:Mesenchymal_Stem_Cell:Mesendoderm:Trophoblast-like_Cell	NA	rs60889063	26
ENSG00000263207	RP11-26L20.4	16	55366267	55366879	1	lincRNA	NA	NA	NA	NA	0	0	0	NA	NA	NA	NA	Yes	IMR90:Mesenchymal_Stem_Cell:Trophoblast-like_Cell	NA	rs60889063	26
ENSG00000087253	LPCAT2	16	55542910	55620582	1	protein_coding	54947	LPCAT2	1.12519142457894e-06	1.042935368	0	0	0	NA	NA	NA	NA	Yes	Mesenchymal_Stem_Cell	NA	rs60889063	26
ENSG00000261997	RP11-212I21.4	16	55572112	55575939	1	lincRNA	NA	NA	NA	NA	0	0	0	NA	NA	NA	NA	Yes	IMR90:Left_Ventricle:Mesenchymal_Stem_Cell	NA	rs60889063	26
ENSG00000256812	CAPNS2	16	55600584	55601599	1	protein_coding	84290	CAPNS2	0.131736738431294	-0.28625896	0	0	0	NA	NA	NA	NA	Yes	IMR90:Mesenchymal_Stem_Cell	NA	rs60889063	26
ENSG00000103546	SLC6A2	16	55689516	55740104	1	protein_coding	6530	SLC6A2	0.277118300003759	-0.057499085	0	0	0	NA	NA	NA	NA	Yes	IMR90:Mesenchymal_Stem_Cell	NA	rs60889063	26
ENSG00000228695	CES1P1	16	55794460	55828070	1	pseudogene	51716	CES1P1	NA	NA	0	0	0	NA	NA	NA	NA	Yes	IMR90:Mesenchymal_Stem_Cell	NA	rs60889063	26
ENSG00000246379	RP11-461O7.1	16	56126899	56225006	-1	lincRNA	283856	LOC283856	NA	NA	0	0	0	NA	NA	NA	NA	Yes	Mesenchymal_Stem_Cell	NA	rs60889063	26
ENSG00000087258	GNAO1	16	56225302	56391356	1	protein_coding	2775	GNAO1	0.98428817684836	0.474248501	0	0	0	NA	NA	NA	NA	Yes	Mesenchymal_Stem_Cell	NA	rs60889063	26
ENSG00000261439	CTD-2050B12.2	16	56226526	56228430	-1	antisense	26077	DKFZP434H168	NA	NA	0	0	0	NA	NA	NA	NA	Yes	Mesenchymal_Stem_Cell	NA	rs60889063	26
ENSG00000103160	HSDL1	16	84155886	84178797	-1	protein_coding	83693	HSDL1	0.000929031159036312	0.67768328	0	0	0	NA	NA	NA	NA	Yes	hESC:IMR90:Mesenchymal_Stem_Cell	4.633e-06	rs934166	27
ENSG00000154099	DNAAF1	16	84178865	84212373	1	protein_coding	123872	DNAAF1	5.41468353704791e-06	NA	0	0	0	NA	NA	NA	NA	Yes	hESC:IMR90:Mesenchymal_Stem_Cell	4.633e-06	rs934166	27
ENSG00000140950	TLDC1	16	84511681	84587639	-1	protein_coding	57707	TLDC1	2.2902052991234e-12	1.116889066	2	4.741	0	NA	NA	NA	NA	Yes	IMR90:Mesenchymal_Stem_Cell	4.633e-06	rs934166	27
ENSG00000103187	COTL1	16	84599200	84651683	-1	protein_coding	23406	COTL1	0.0667591515201751	0.707463179	2	4.741	2	1.37142e-16	0	BIOS_eQTL_geneLevel	+	Yes	GM12878:IMR90:Mesenchymal_Stem_Cell	4.633e-06	rs934166	27
ENSG00000261471	RP11-61F12.1	16	84627999	84630432	1	antisense	NA	NA	NA	NA	2	4.741	2	2.48237e-57	0	BIOS_eQTL_geneLevel	+	No	NA	4.633e-06	rs934166	27
ENSG00000135686	KLHL36	16	84682131	84701292	1	protein_coding	79786	KLHL36	0.939925902191205	NA	0	0	0	NA	NA	NA	NA	Yes	IMR90	4.633e-06	rs934166	27
ENSG00000103194	USP10	16	84733584	84813528	1	protein_coding	9100	USP10	0.98885345266455	NA	0	0	0	NA	NA	NA	NA	Yes	IMR90:Mesenchymal_Stem_Cell	4.633e-06	rs934166	27
ENSG00000232190	RP11-134D3.1	16	87091390	87097597	1	processed_transcript	440390	LINC02181	NA	NA	2	5.743	0	NA	NA	NA	NA	No	NA	9.235e-06	rs75985084	28
ENSG00000261363	RP11-134D3.2	16	87100311	87103354	1	lincRNA	NA	NA	NA	NA	3	5.743	0	NA	NA	NA	NA	No	NA	9.235e-06	rs75985084	28
ENSG00000260456	C16orf95	16	87117168	87351022	-1	protein_coding	100506581	C16orf95	NA	0.915813928	5	5.743	0	NA	NA	NA	NA	No	NA	9.235e-06	rs75985084	28
ENSG00000167840	ZNF232	17	5008836	5026411	-1	protein_coding	7775	ZNF232	0.000435397717293909	NA	0	0	0	NA	NA	NA	NA	Yes	Mesenchymal_Stem_Cell	4.224e-06	rs11653290	29
ENSG00000234327	AC012146.7	17	5014763	5017674	1	processed_transcript	101928000	LOC101928000	NA	NA	0	0	0	NA	NA	NA	NA	Yes	Mesenchymal_Stem_Cell	4.224e-06	rs11653290	29
ENSG00000129204	USP6	17	5019733	5078329	1	protein_coding	9098	USP6	1.76208067122363e-18	-1.131908375	0	0	0	NA	NA	NA	NA	Yes	Mesenchymal_Stem_Cell	4.224e-06	rs11653290	29
ENSG00000267047	RP11-589P10.7	17	6888813	6922733	-1	antisense	NA	NA	NA	NA	0	0	0	NA	NA	NA	NA	Yes	hESC	4.224e-06	rs11653290	29
ENSG00000269871	AC040977.1	17	6915928	6917755	-1	protein_coding	NA	NA	NA	NA	0	0	0	NA	NA	NA	NA	Yes	hESC	4.224e-06	rs11653290	29
ENSG00000161939	RNASEK-C17orf49	17	6915954	6920839	1	protein_coding	100529209	RNASEK-C17orf49	NA	NA	0	0	0	NA	NA	NA	NA	Yes	hESC	4.224e-06	rs11653290	29
ENSG00000258315	C17orf49	17	6917814	6920844	1	protein_coding	124944	C17orf49	0.00762293080428993	NA	0	0	0	NA	NA	NA	NA	Yes	hESC	4.224e-06	rs11653290	29
ENSG00000267532	MIR497HG	17	6919137	6922978	-1	antisense	100506755	MIR497HG	NA	NA	0	0	0	NA	NA	NA	NA	Yes	hESC	4.224e-06	rs11653290	29
ENSG00000161940	BCL6B	17	6926339	6933609	1	protein_coding	255877	BCL6B	0.151089911885991	0.043080987	3	4.744	0	NA	NA	NA	NA	Yes	hESC	4.224e-06	rs11653290	29
ENSG00000174327	SLC16A13	17	6939394	6943440	1	protein_coding	201232	SLC16A13	7.50511260026083e-07	-0.627521408	4	4.744	0	NA	NA	NA	NA	Yes	hESC	4.224e-06	rs11653290	29
ENSG00000174326	SLC16A11	17	6944949	6947242	-1	protein_coding	162515	SLC16A11	0.0459183066040548	0.234440625	4	4.744	0	NA	NA	NA	NA	Yes	hESC	4.224e-06	rs11653290	29
ENSG00000262067	CTD-2545G14.2	17	6962253	6962523	1	pseudogene	NA	NA	NA	NA	4	4.744	0	NA	NA	NA	NA	No	NA	4.224e-06	rs11653290	29
ENSG00000132514	CLEC10A	17	6977856	6983626	-1	protein_coding	10462	CLEC10A	4.25495920863582e-08	0.539496549	4	4.744	0	NA	NA	NA	NA	No	NA	4.224e-06	rs11653290	29
ENSG00000161944	ASGR2	17	7004641	7019019	-1	protein_coding	433	ASGR2	6.63907703485809e-06	0.792382564	4	4.744	0	NA	NA	NA	NA	No	NA	4.224e-06	rs11653290	29
ENSG00000006047	YBX2	17	7191571	7197934	-1	protein_coding	51087	YBX2	0.968725623233792	NA	0	0	3	7.558e-05	0.0418499495149041	BIOS_eQTL_geneLevel	+	No	NA	4.224e-06	rs11653290	29
ENSG00000141510	TP53	17	7565097	7590856	-1	protein_coding	7157	TP53	0.91222295333147	-0.1200951	0	0	3	1.89699e-05	0.043329	GTEx_v7_Skin_Not_Sun_Exposed_Suprapubic	+	No	NA	4.224e-06	rs11653290	29
ENSG00000182224	CYB5D1	17	7761064	7765600	1	protein_coding	124637	CYB5D1	4.57519538498037e-05	-1.966049949	0	0	3	4.59967e-05	0.00422937	GTEx_v7_Cells_Transformed_fibroblasts	-	No	NA	4.224e-06	rs11653290	29
ENSG00000184185	KCNJ12	17	21279509	21323179	1	protein_coding	3768	KCNJ12	1.42518086932541e-05	8.291981886	0	0	10	1.32715e-10	1.51298e-08	GTEx_v6_Skin_Not_Sun_Exposed_Suprapubic:GTEx_v6_Skin_Sun_Exposed_Lower_leg:GTEx_v7_Skin_Not_Sun_Exposed_Suprapubic:GTEx_v7_Skin_Sun_Exposed_Lower_leg	+	No	NA	4.696e-05	17:21509395	30
ENSG00000244582	RPL21P120	17	21407884	21408385	1	pseudogene	731688	RPL21P120	NA	NA	2	7.326	0	NA	NA	NA	NA	No	NA	4.696e-05	17:21509395	30
ENSG00000265265	RP11-822E23.7	17	21422775	21424530	1	lincRNA	NA	NA	NA	NA	3	7.326	0	NA	NA	NA	NA	No	NA	4.696e-05	17:21509395	30
ENSG00000212719	C17orf51	17	21428051	21477722	-1	protein_coding	339263	C17orf51	NA	1.160941423	14	9.138	11	9.46845e-122	0	GTEx_v6_Adipose_Subcutaneous:GTEx_v6_Esophagus_Mucosa:GTEx_v6_Liver:GTEx_v6_Lung:GTEx_v6_Nerve_Tibial:GTEx_v6_Skin_Not_Sun_Exposed_Suprapubic:GTEx_v6_Skin_Sun_Exposed_Lower_leg:GTEx_v6_Thyroid:GTEx_v7_Adipose_Subcutaneous:GTEx_v7_Adipose_Visceral_Omentum:GTEx_v7_Artery_Tibial:GTEx_v7_Cells_Transformed_fibroblasts:GTEx_v7_Esophagus_Mucosa:GTEx_v7_Esophagus_Muscularis:GTEx_v7_Liver:GTEx_v7_Lung:GTE…	-	No	NA	5.733e-06	17:21509395	30
ENSG00000272780	RP11-822E23.8	17	21435738	21477781	-1	processed_transcript	NA	NA	NA	NA	14	9.138	0	NA	NA	NA	NA	No	NA	5.733e-06	17:21509395	30
ENSG00000266466	RP11-822E23.2	17	21436235	21446049	1	antisense	NA	NA	NA	NA	8	7.326	11	9.46845e-122	0	BIOS_eQTL_geneLevel	-	No	NA	4.696e-05	17:21509395	30
ENSG00000266673	RP11-822E23.3	17	21455772	21455974	1	pseudogene	NA	NA	NA	NA	10	9.138	0	NA	NA	NA	NA	No	NA	4.696e-05	17:21509395	30
ENSG00000266050	RP11-822E23.6	17	21469833	21477781	-1	pseudogene	NA	NA	NA	NA	14	9.138	9	1.72676e-08	3.82198e-05	GTEx_v7_Liver:GTEx_v7_Lung	-	No	NA	5.733e-06	17:21509395	30
ENSG00000264245	RP11-822E23.4	17	21477034	21477337	1	pseudogene	NA	NA	NA	NA	14	9.138	0	NA	NA	NA	NA	No	NA	5.733e-06	17:21509395	30
ENSG00000216100	AC138710.1	17	21481084	21481171	1	miRNA	NA	NA	NA	NA	14	9.138	0	NA	NA	NA	NA	No	NA	5.733e-06	17:21509395	30
ENSG00000263375	RP11-822E23.5	17	21496060	21497446	1	pseudogene	NA	NA	NA	NA	14	9.138	0	NA	NA	NA	NA	No	NA	5.733e-06	17:21509395	30
ENSG00000265019	NCOR1P2	17	21536014	21544603	1	pseudogene	729490	NCOR1P2	NA	NA	9	9.138	0	NA	NA	NA	NA	No	NA	5.733e-06	17:21509395	30
ENSG00000265233	AC144838.2	17	21549811	21549979	1	pseudogene	NA	NA	NA	NA	5	9.138	0	NA	NA	NA	NA	No	NA	5.733e-06	17:21509395	30
ENSG00000264617	AC144838.3	17	21560548	21562330	-1	pseudogene	NA	NA	NA	NA	3	2.931	2	1.55848e-05	0.0177929	GTEx_v7_Brain_Caudate_basal_ganglia	+	No	NA	4.696e-05	17:21509395	30
ENSG00000267785	CTD-3194G12.2	17	35078894	35082651	1	lincRNA	NA	NA	NA	NA	6	3.484	0	NA	NA	NA	NA	Yes	hESC:IMR90:Mesenchymal_Stem_Cell:Mesendoderm	3.879e-05	rs8067970	31
ENSG00000121064	SCPEP1	17	55055466	55084129	1	protein_coding	59342	SCPEP1	6.98627530887446e-08	-0.174410067	0	0	0	NA	NA	NA	NA	Yes	hESC:Mesendoderm	1.295e-06	rs115990591	33
ENSG00000261192	RNF126P1	17	55122839	55124158	1	pseudogene	376412	RNF126P1	NA	NA	0	0	0	NA	NA	NA	NA	Yes	IMR90:Mesendoderm	1.295e-06	rs115990591	33
ENSG00000263004	RP11-166P13.3	17	55155659	55162385	-1	lincRNA	NA	NA	NA	NA	0	0	0	NA	NA	NA	NA	Yes	hESC:IMR90:Left_Ventricle:Mesenchymal_Stem_Cell:Mesendoderm:Trophoblast-like_Cell	1.295e-06	rs115990591	33
ENSG00000121057	AKAP1	17	55162453	55198710	1	protein_coding	8165	AKAP1	0.561768712699788	0.843078893	0	0	0	NA	NA	NA	NA	Yes	hESC:IMR90:Left_Ventricle:Mesenchymal_Stem_Cell:Mesendoderm:Trophoblast-like_Cell	1.295e-06	rs115990591	33
ENSG00000153944	MSI2	17	55333212	55762046	1	protein_coding	124540	MSI2	0.963858041525188	-2.745991629	3	3.577	0	NA	NA	NA	NA	Yes	IMR90:Mesenchymal_Stem_Cell:Mesendoderm	1.295e-06	rs115990591	33
ENSG00000263499	RP11-118E18.4	17	55678217	55685773	-1	antisense	101927539	LOC101927539	NA	NA	3	3.577	0	NA	NA	NA	NA	No	NA	1.295e-06	rs115990591	33
ENSG00000242889	RN7SL449P	17	55695469	55695759	1	misc_RNA	106481045	RN7SL449P	NA	NA	3	3.577	0	NA	NA	NA	NA	No	NA	1.295e-06	rs115990591	33
[truncated: 50 more rows]

## Sheet: SuppTable_4a_GeneSetNan
Supplementary Table 4a. Gene-sets with significant enrichment for genes associated with gene-smoking interaction for cIMT based on positional, eQTL, or chromatin interaction of suggestive GWAS SNPs (p<1E-05) in Nanoro sample.
[truncated: 281 more rows]

[truncated: 4 more sheets: SuppTable_4b_GeneSetNav, SuppTable_4c_GeneSetAll, SuppTable_5, Sheet8]
